# Supplementary material
Source: PubMed Central journal article supplement (PMC8877724)

Synthesis of Guaianolide Analogues with a Tunable  $\alpha$ -Methylene- $\gamma$ -lactam Electrophile and  
Correlating Bioactivity with Thiol Reactivity

**Authors**

Paul A. Jackson,<sup>†</sup> Henry A. M. Schares,<sup>‡</sup> Katherine F. M. Jones,<sup>§</sup> John C. Widen,<sup>‡</sup> Daniel P.  
Dempe,<sup>†</sup> Francois Grillet,<sup>†</sup> Matthew E. Cuellar,<sup>||</sup> Michael A. Walters,<sup>||</sup> Daniel A. Harki,<sup>‡§\*</sup>

Kay M. Brummond<sup>†\*</sup>

<sup>†</sup> *Department of Chemistry, University of Pittsburgh, Pittsburgh, Pennsylvania 15260, United States*

<sup>‡</sup> *Department of Medicinal Chemistry, University of Minnesota, Minneapolis, Minnesota 55455, United States*

<sup>§</sup> *Department of Chemistry, University of Minnesota, Minneapolis, Minnesota 55455, United States*

<sup>||</sup> *Institute for Therapeutics Discovery and Development, University of Minnesota, Minneapolis, Minnesota 55455, United States*

## Table of Contents

|                                                                                                                                                  |      |
|--------------------------------------------------------------------------------------------------------------------------------------------------|------|
| Figure S1. Structures of Supporting Information Compounds.....                                                                                   | S3   |
| Tables S1 and S2.....                                                                                                                            | S4   |
| Reaction of $\alpha$ -Methylene- $\gamma$ -Lactams and Lactone <b>S17</b> with Cysteamine: Monitoring Reaction Progress by $^1\text{H}$ NMR..... | S6   |
| Biological Materials and Methods.....                                                                                                            | S29  |
| $^1\text{H}$ NMR, $^{13}\text{C}$ NMR, and Peptide Mass Spectra.....                                                                             | S38  |
| HSQC of $\alpha$ -Methylene- $\gamma$ -Lactam <b>52</b> .....                                                                                    | S172 |

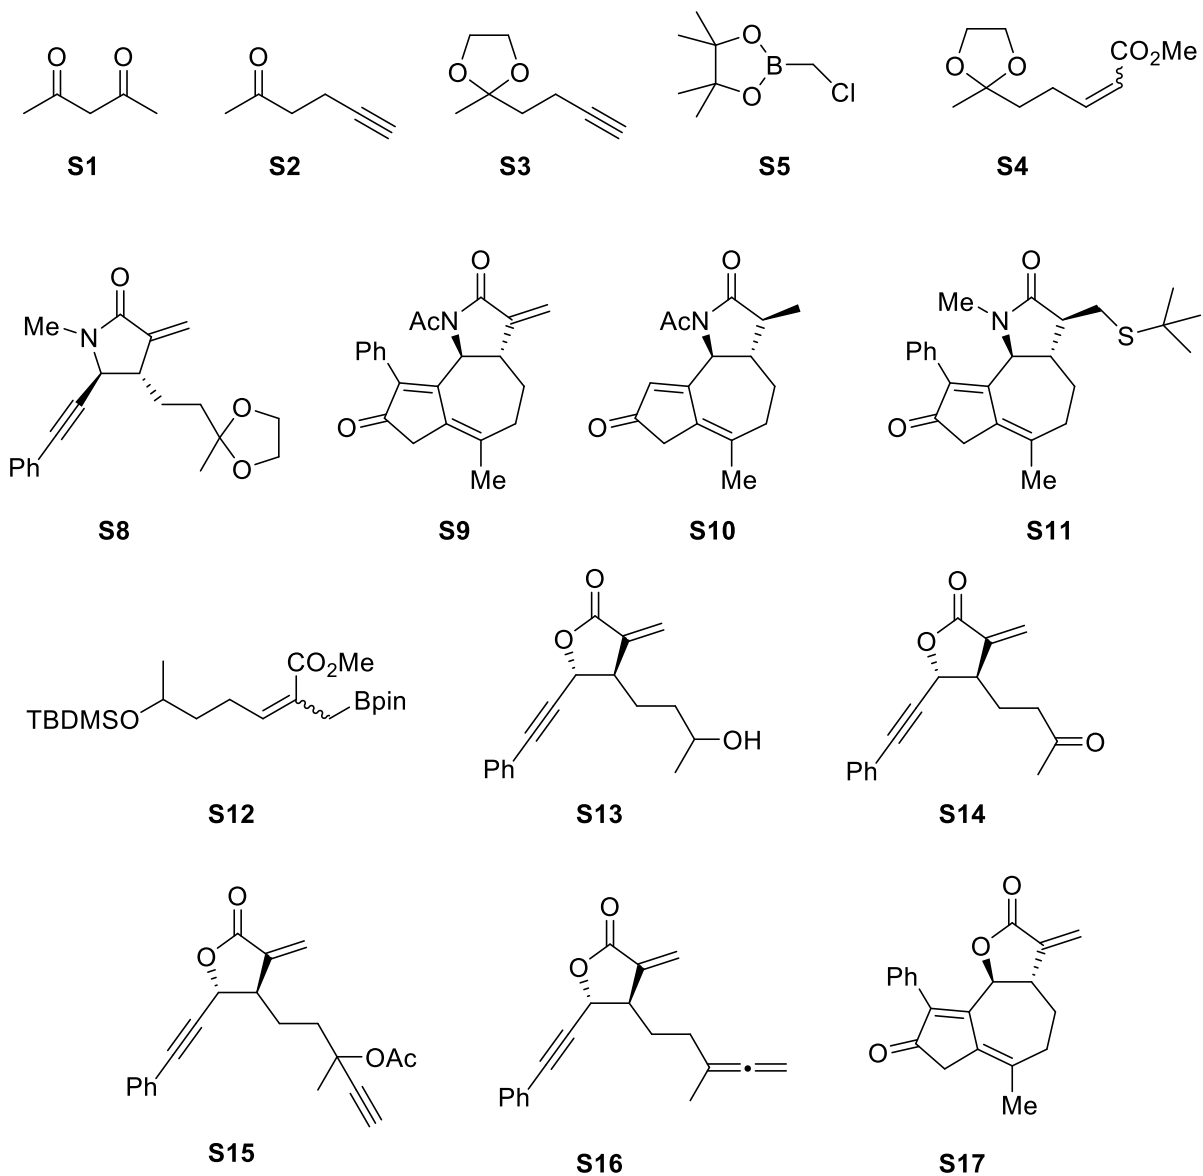

**Figure S1.** Structures of Supporting Information Compounds

Supporting Information Table S1

| <b>A549/NF-κB-Luciferase Activity (%)</b> |                                      |              |              |                                  |              |              |
|-------------------------------------------|--------------------------------------|--------------|--------------|----------------------------------|--------------|--------------|
| <b>Compound</b>                           | A549/NF-κB Luciferase Reporter Assay |              |              | Alamar Blue Cell Viability Assay |              |              |
|                                           | 20μM                                 | 10μM         | 5μM          | 20μM                             | 10μM         | 5μM          |
| <b>45</b>                                 | 93.6 ± 8.2                           | 97.3 ± 9.0   | 96.2 ± 12.1  | 102.0 ± 11.3                     | 97.3 ± 22.0  | 91.1 ± 13.9  |
| <b>47</b>                                 | 100.4 ± 7.7                          | 106.2 ± 13.4 | 100.5 ± 15.2 | 87.9 ± 26.9                      | 96.3 ± 13.8  | 96.8 ± 16.9  |
| <b>48</b>                                 | 101.3 ± 4.2                          | 95.7 ± 6.5   | 101.6 ± 7.4  | 111.6 ± 17.4                     | 98.5 ± 10.8  | 99.9 ± 23.0  |
| <b>49</b>                                 | 86.0 ± 17.6                          | 95.3 ± 15.9  | 105.8 ± 16.4 | 108.4 ± 19.6                     | 100.6 ± 11.9 | 97.2 ± 31.2  |
| <b>51</b>                                 | 20.9 ± 2.7                           | 61.9 ± 8.5   | 85.6 ± 7.2   | 88.0 ± 38.3                      | 96.8 ± 21.8  | 103.7 ± 22.0 |
| <b>52</b>                                 | 80.8 ± 12.8                          | 95.7 ± 7.2   | 98.9 ± 11.5  | 99.2 ± 7.5                       | 99.0 ± 11.1  | 96.6 ± 16.2  |
| <b>54</b>                                 | 2.6 ± 1.3                            | 8.8 ± 2.2    | 33.1 ± 5.2   | 64.1 ± 7.7                       | 63.6 ± 12.1  | 80.7 ± 7.0   |
| <b>60</b>                                 | 28.3 ± 13.7                          | 59.1 ± 6.1   | 97.8 ± 19.5  | 82.3 ± 8.2                       | 93.3 ± 10.9  | 89.0 ± 5.3   |

**Table S1.** Relative NF-κB activities (%; left) and relative cellular viabilities (%; right) for lactams dosed at various concentrations to A549/NF-κB-luc cells (Figure 4). Values are shown as mean ± S.D. for n ≥ 3 biological replicates.

Supporting Information Table S2

| <b>HEK293-NF-κB/SEAP Activity (%)</b> |                                  |              |             |              |                                  |              |             |             |
|---------------------------------------|----------------------------------|--------------|-------------|--------------|----------------------------------|--------------|-------------|-------------|
| <b>Compound</b>                       | HEK293-NF-κB/SEAP Reporter Assay |              |             |              | Alamar Blue Cell Viability Assay |              |             |             |
|                                       | 7.5μM                            | 5μM          | 2.5μM       | 1μM          | 7.5μM                            | 5μM          | 2.5μM       | 1μM         |
| <b>PTL</b>                            | 19.7 ± 4.6                       | 21.1 ± 5.0   | 49.7 ± 10.3 | 85.2 ± 15.8  | 74.4 ± 5.4                       | 87.1 ± 9.6   | 93.3 ± 14.5 | 104.7±17.7  |
| <b>49</b>                             | 102.0±43.1                       | 113.2 ± 37.3 | 97.4 ± 29.9 | 143.5 ± 29.0 | 99.1 ± 12.2                      | 101.3 ± 7.11 | 97.9 ± 12.1 | 94.6 ± 7.1  |
| <b>51</b>                             | 44.1 ± 13.8                      | 59.7 ± 18.3  | 93.2 ± 20.3 | 104.4 ± 39.3 | 101.2±12.3                       | 110.7 ± 11.9 | 107.4 ± 6.6 | 113.5 ± 6.3 |
| <b>54</b>                             | 20.1 ± 4.1                       | 27.6 ± 6.4   | 54.2 ± 13.7 | 85.1 ± 26.6  | 82.0 ± 5.2                       | 87.8 ± 8.7   | 92.8 ± 8.0  | 101.7 ± 9.1 |
| <b>60</b>                             | 18.9 ± 3.5                       | 20.3 ± 4.0   | 34.5 ± 13.3 | 63.4 ± 20.2  | 68.7 ± 9.1                       | 76.3 ± 5.4   | 90.3 ± 12.7 | 102.6±17.1  |

**Table S2.** Relative NF-κB activities (%; left) and relative cellular viabilities (%; right) for lactams dosed at various concentrations to HEK293/NF-κB-SEAP cells (Figure 4). Values are shown as mean ± S.D. for n ≥ 3 biological replicates.

**Reaction of  $\alpha$ -Methylene- $\gamma$ -Lactams and Lactone S17 with Cysteamine: Monitoring Reaction Progress by  $^1\text{H}$  NMR.**

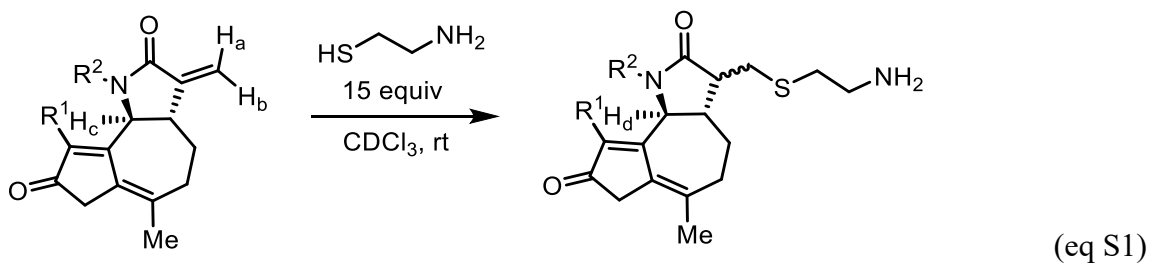

$$\text{Fraction Remaining}_x = \frac{\frac{H_a + H_b}{2}}{H_c + H_d} \quad (\text{eq S2})$$

$$\ln(\text{Fraction Remaining}_x) = -k_{\text{pseudo1st}}t + \ln(\text{Fraction Remaining}_{x_0}) \quad (\text{eq S3})$$

$$t_{1/2} = \frac{\ln 2}{k_{\text{pseudo1st}}} \quad (\text{eq S4})$$

$$\text{Fraction Remaining}_x = \frac{\frac{H_a + H_b}{2}}{\frac{H_{\text{hexamethylbenzene}}}{32}} \quad (\text{eq S5})$$

$$\text{Fraction Remaining}_x = \frac{\frac{H_a + H_b}{2}}{\frac{H_{\text{hexamethylbenzene}}}{18}} \quad (\text{eq S6})$$

**Table S3. <sup>1</sup>H NMR Integration and ln(Fraction Remaining) Values Used to Determine Pseudo-first Order Rate Constant for Reaction of Cysteamine with Lactam 45**

| Time              | Time Point | Integration Values |                |                                | Fraction Remaining | ln(Fraction Remaining) |
|-------------------|------------|--------------------|----------------|--------------------------------|--------------------|------------------------|
|                   |            | H <sub>a</sub>     | H <sub>b</sub> | H <sub>c</sub> +H <sub>d</sub> |                    |                        |
| mm/dd/yy<br>hh:mm | d:h:min    | δ 5.95             | δ 5.25         | δ 4.8                          |                    |                        |
| 6/3/15 12:55      | 1:0:00     | 1                  | 1.03           | 1.57                           | 0.646497           | -0.43619               |
| 6/4/15 10:10      | 1:21:15    | 1                  | 1.02           | 2.07                           | 0.487923           | -0.7176                |
| 6/5/15 10:30      | 2:21:35    | 1                  | 1              | 2.54                           | 0.393701           | -0.93216               |
| 6/8/15 11:41      | 5:22:46    | 1                  | 1.22           | 8.56                           | 0.129673           | -2.04274               |

**Figure S1. <sup>1</sup>H NMR Spectra at Reaction Time Points for Cysteamine and Lactam 45**

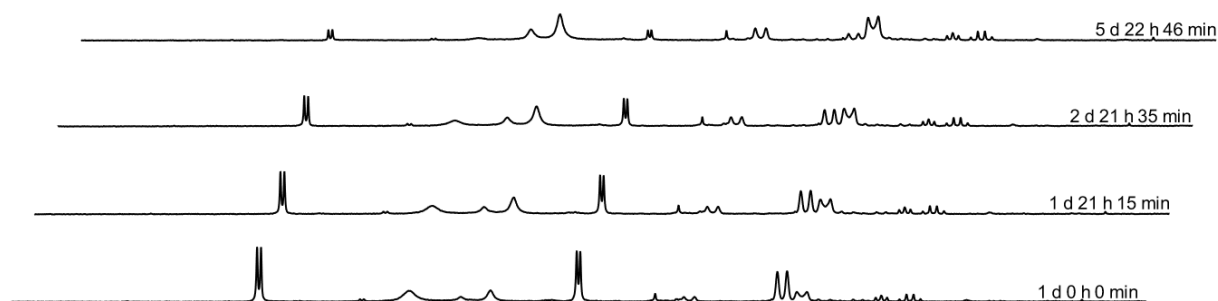

**Figure S2. Fraction Remaining Values Plotted Against Time Points for Lactam 45**

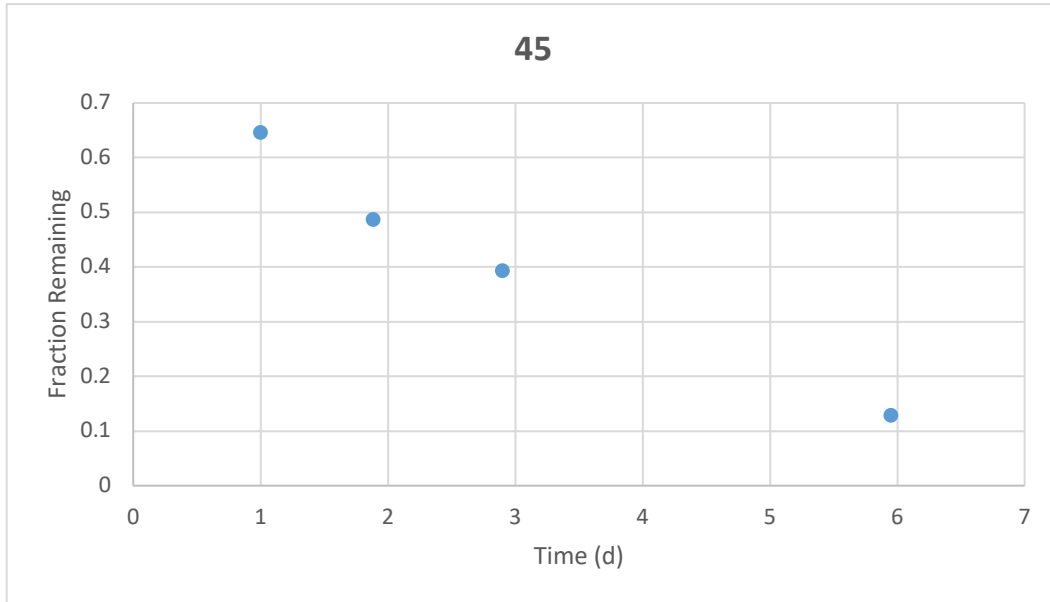

**Figure S3. ln(Fraction Remaining) Values Plotted Against Time Points for Lactam 45**

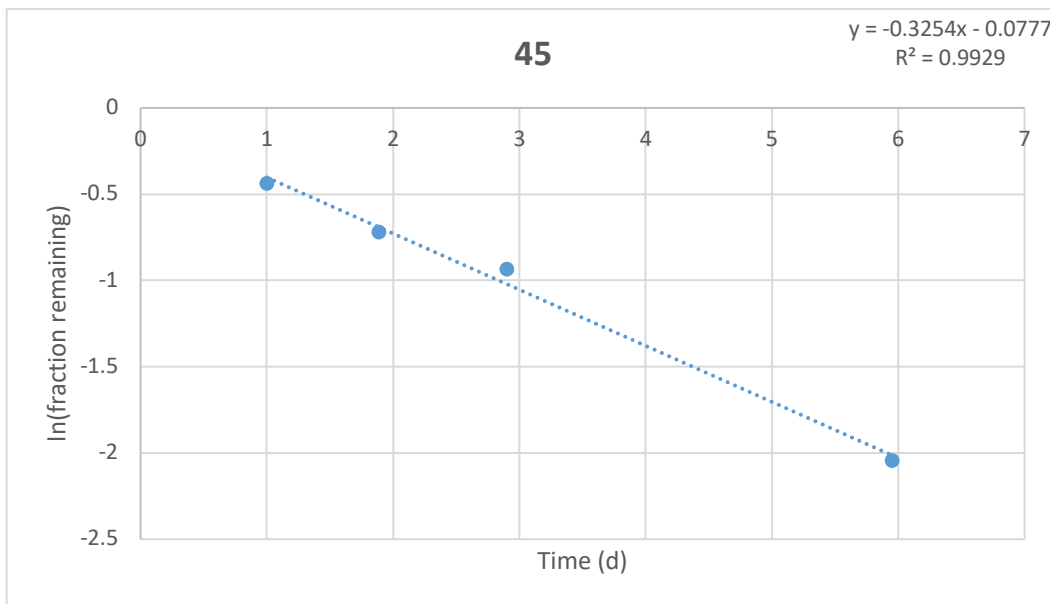



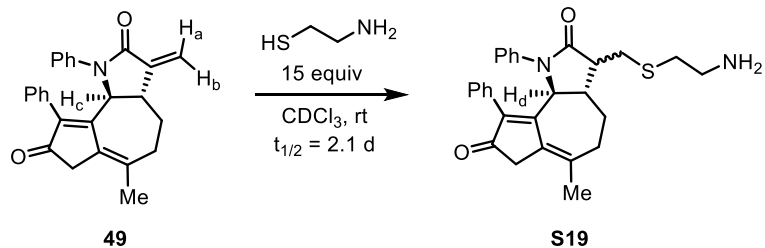

**Table S4. <sup>1</sup>H NMR Integration and ln(Fraction Remaining) Values Used to Determine Pseudo-first Order Rate Constant for Reaction of Cysteamine with Lactam 49**

| Time<br>mm/dd/yy<br>hh:mm | Time Point<br>min | Integration values       |                          |                                          | Fraction<br>Remaining | ln(Fraction<br>Remaining) |
|---------------------------|-------------------|--------------------------|--------------------------|------------------------------------------|-----------------------|---------------------------|
|                           |                   | H <sub>a</sub><br>δ 6.24 | H <sub>b</sub><br>δ 5.46 | H <sub>c</sub> +H <sub>d</sub><br>δ 5.35 |                       |                           |
| 5/22/19 12:05             | 0:0:00            | 1                        | 1.06                     | 1.07                                     | 0.962617              | -0.0381                   |
| 5/22/19 12:07             | 0:0:02            | 1                        | 1.1                      | 1.07                                     | 0.981308              | -0.01887                  |
| 5/22/19 12:43             | 0:0:38            | 1                        | 1.1                      | 1.08                                     | 0.972222              | -0.02817                  |
| 5/22/19 12:45             | 0:0:40            | 1                        | 1.04                     | 1.07                                     | 0.953271              | -0.04786                  |
| 5/22/19 13:36             | 0:1:31            | 1                        | 1.06                     | 1.11                                     | 0.927928              | -0.0748                   |
| 5/22/19 13:38             | 0:1:33            | 1                        | 1.06                     | 1.12                                     | 0.919643              | -0.08377                  |
| 5/22/19 14:06             | 0:2:01            | 1                        | 1.06                     | 1.12                                     | 0.919643              | -0.08377                  |
| 5/22/19 18:05             | 0:6:00            | 1                        | 1.06                     | 1.2                                      | 0.858333              | -0.15276                  |
| 5/23/19 7:34              | 0:19:29           | 1                        | 1.12                     | 1.53                                     | 0.69281               | -0.367                    |
| 5/23/19 9:39              | 0:21:34           | 1                        | 1.19                     | 1.65                                     | 0.663636              | -0.41002                  |
| 5/23/19 9:41              | 0:21:36           | 1                        | 1.15                     | 1.61                                     | 0.667702              | -0.40391                  |
| 5/23/19 13:44             | 1:1:39            | 1                        | 1.13                     | 1.73                                     | 0.615607              | -0.48515                  |
| 5/23/19 13:46             | 1:1:41            | 1                        | 1.16                     | 1.76                                     | 0.613636              | -0.48835                  |
| 5/23/19 15:31             | 1:0:00            | 1                        | 1.17                     | 1.82                                     | 0.596154              | -0.51726                  |
| 5/23/19 15:33             | 1:3:28            | 1                        | 1.16                     | 1.75                                     | 0.617143              | -0.48265                  |
| 5/23/19 16:49             | 1:4:44            | 1                        | 1.15                     | 1.89                                     | 0.568783              | -0.56426                  |
| 5/23/19 16:51             | 1:4:46            | 1                        | 1.13                     | 1.81                                     | 0.588398              | -0.53035                  |
| 5/24/19 10:32             | 1:22:27           | 1                        | 1.18                     | 2.41                                     | 0.452282              | -0.79345                  |
| 5/24/19 10:34             | 1:22:29           | 1                        | 1.19                     | 2.37                                     | 0.462025              | -0.77214                  |
| 5/24/19 13:43             | 2:1:38            | 1                        | 1.26                     | 2.62                                     | 0.431298              | -0.84096                  |
| 5/24/19 15:36             | 2:3:31            | 1                        | 1.27                     | 2.71                                     | 0.418819              | -0.87032                  |
| 5/24/19 17:56             | 2:5:51            | 1                        | 1.27                     | 2.77                                     | 0.409747              | -0.89221                  |
| 5/25/19 13:35             | 3:1:30            | 1                        | 1.35                     | 3.77                                     | 0.311671              | -1.16581                  |
| 5/25/19 22:16             | 3:10:11           | 1                        | 1.33                     | 4.11                                     | 0.283455              | -1.2607                   |
| 5/25/19 22:18             | 3:10:13           | 1                        | 1.41                     | 4.24                                     | 0.284198              | -1.25808                  |
| 5/26/19 11:16             | 3:23:11           | 1                        | 1.57                     | 5.16                                     | 0.249031              | -1.39018                  |
| 5/26/19 11:18             | 3:23:13           | 1                        | 1.51                     | 5.02                                     | 0.25                  | -1.38629                  |
| 5/27/19 10:19             | 4:22:14           | 1                        | 1.74                     | 6.75                                     | 0.202963              | -1.59473                  |

Figure S4. <sup>1</sup>H NMR Spectra at Reaction Time Points for Cysteamine and Lactam 49

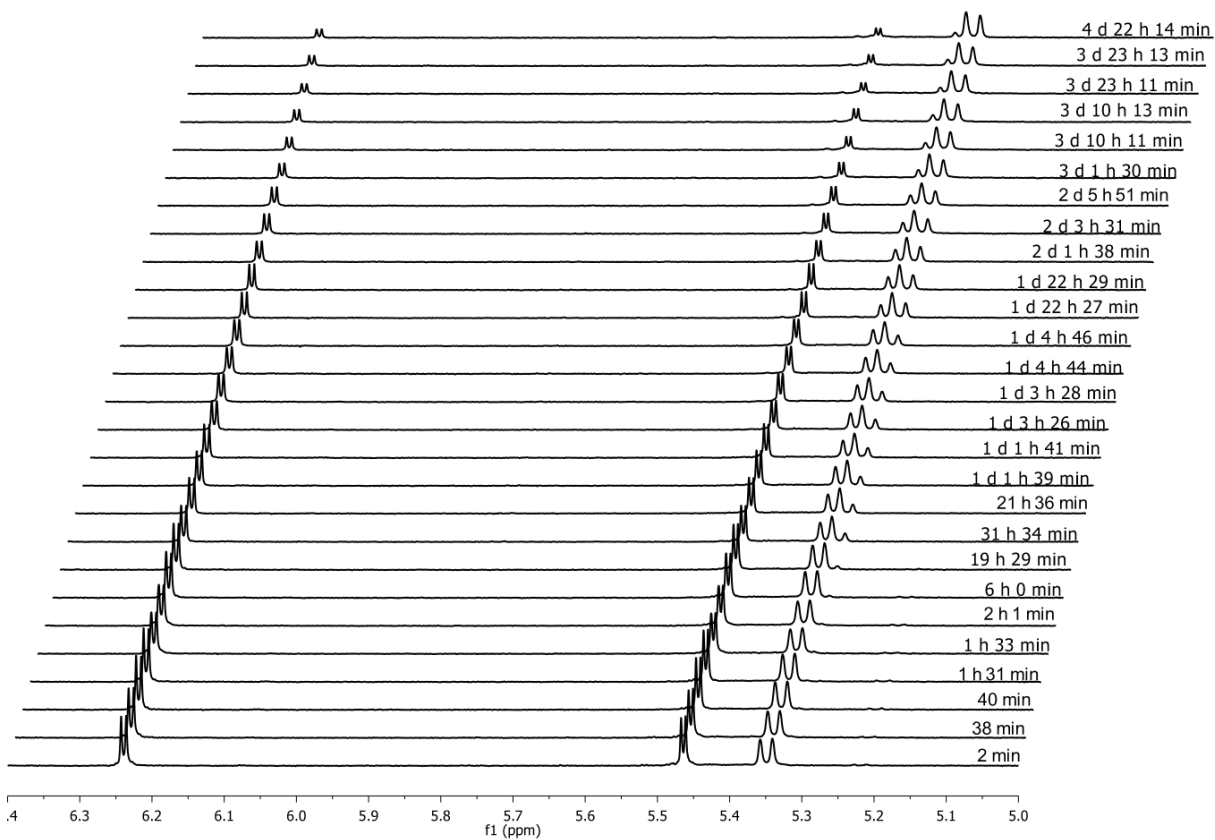

**Figure S5. Fraction Remaining Values Plotted Against Time Points for Lactam 49**

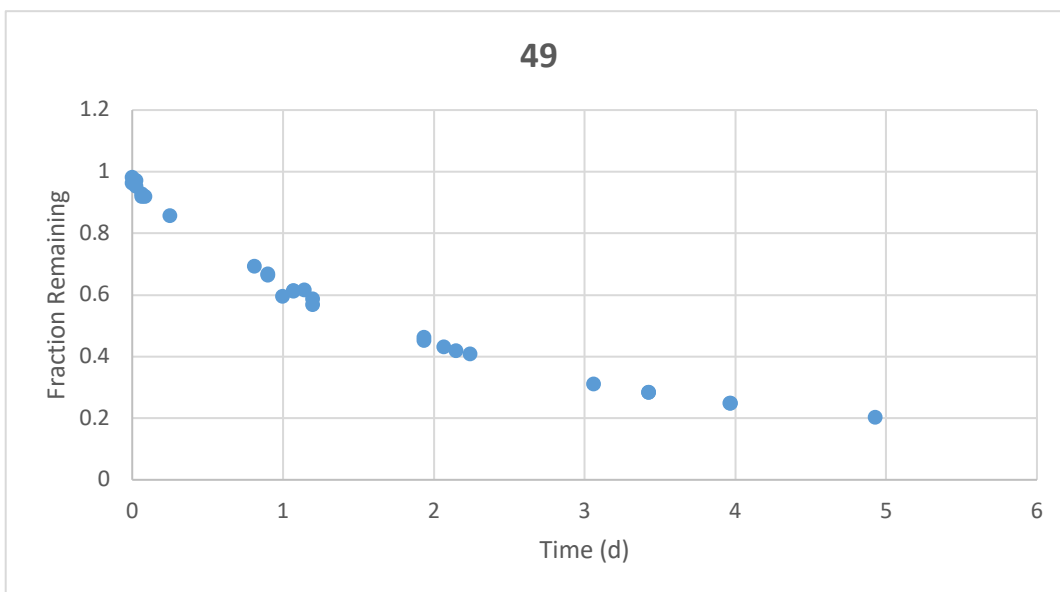

**Figure S6. ln(Fraction Remaining) Values Plotted Against Time Points for Lactam 49**

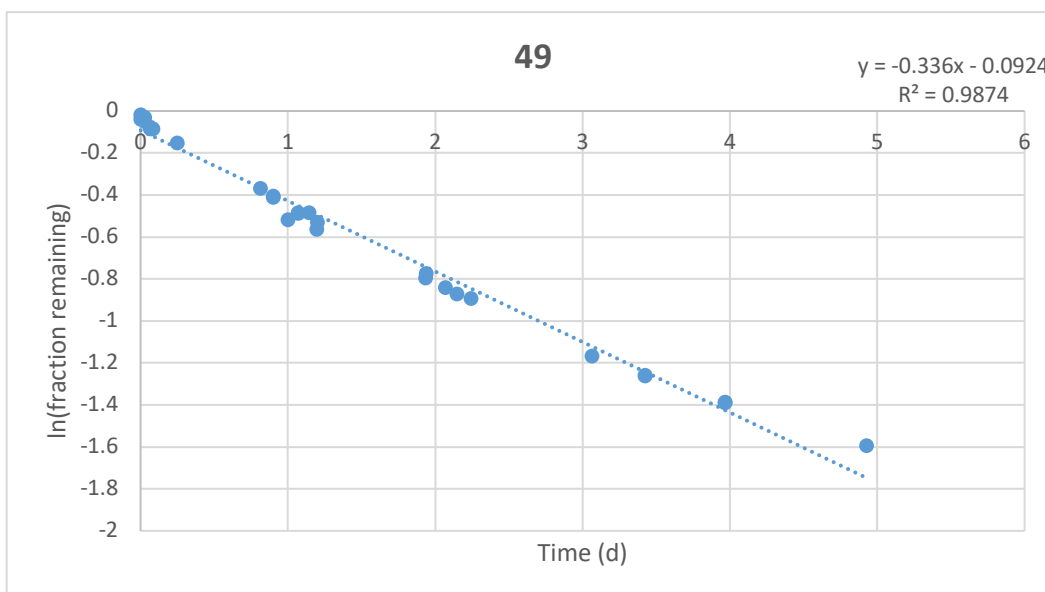

**Table S5. <sup>1</sup>H NMR Integration and ln(Fraction Remaining) Values Used to Determine Pseudo-first Order Rate Constant for Reaction of Cysteamine with Lactam 49 and Internal Standard**

| Time            | Time Point | Integration Values |                |                   | Fraction Remaining | ln(Fraction Remaining) |
|-----------------|------------|--------------------|----------------|-------------------|--------------------|------------------------|
|                 |            | H <sub>a</sub>     | H <sub>b</sub> | Internal standard |                    |                        |
| m/dd/yy hh:mm   | d:h:min    | δ 6.18             | δ 5.4          | δ 2.2             |                    |                        |
| 5/22/2019 12:05 | 0:0:00     | 1                  | 1.06           | 32.59             | 1.011353           | 0.011289               |
| 5/22/2019 12:07 | 0:0:02     | 1                  | 1.1            | 33.12             | 1.014493           | 0.014389               |
| 5/22/2019 12:43 | 0:0:38     | 1                  | 1.1            | 33.79             | 0.994377           | -0.00564               |
| 5/22/2019 12:45 | 0:0:40     | 1                  | 1.04           | 33.72             | 0.967972           | -0.03255               |
| 5/22/2019 13:36 | 0:1:31     | 1                  | 1.06           | 34.53             | 0.954532           | -0.04653               |
| 5/22/2019 13:38 | 0:1:33     | 1                  | 1.06           | 35.12             | 0.938497           | -0.06348               |
| 5/22/2019 14:06 | 0:2:01     | 1                  | 1.06           | 35.04             | 0.940639           | -0.0612                |
| 5/22/2019 18:05 | 0:6:00     | 1                  | 1.06           | 38.49             | 0.856326           | -0.1551                |
| 5/23/2019 7:34  | 0:19:29    | 1                  | 1.12           | 50.04             | 0.677858           | -0.38882               |
| 5/23/2019 9:39  | 0:21:34    | 1                  | 1.19           | 53.7              | 0.652514           | -0.42692               |
| 5/23/2019       | 0:21:36    | 1                  | 1.15           | 52.37             | 0.656865           | -0.42028               |
| 5/23/2019 13:44 | 1:1:39     | 1                  | 1.13           | 56.2              | 0.606406           | -0.50021               |
| 5/23/2019 13:46 | 1:1:41     | 1                  | 1.16           | 56.51             | 0.611573           | -0.49172               |
| 5/23/2019 15:31 | 1:0:00     | 1                  | 1.17           | 57.77             | 0.601004           | -0.50915               |
| 5/23/2019 15:33 | 1:3:28     | 1                  | 1.16           | 56.65             | 0.610062           | -0.4942                |
| 5/23/2019 16:49 | 1:4:44     | 1                  | 1.15           | 59.86             | 0.574674           | -0.55395               |
| 5/23/2019 16:51 | 1:4:46     | 1                  | 1.13           | 59.34             | 0.574317           | -0.55457               |
| 5/24/2019 10:32 | 1:22:27    | 1                  | 1.18           | 78.15             | 0.446321           | -0.80672               |
| 5/24/2019 10:34 | 1:22:29    | 1                  | 1.19           | 78.49             | 0.446426           | -0.80648               |
| 5/24/2019 13:43 | 2:1:38     | 1                  | 1.26           | 83.98             | 0.430579           | -0.84263               |
| 5/24/2019 15:36 | 2:3:31     | 1                  | 1.27           | 88.54             | 0.41021            | -0.89109               |
| 5/24/2019 17:56 | 2:5:51     | 1                  | 1.27           | 95.41             | 0.380673           | -0.96581               |
| 5/25/2019 13:35 | 3:1:30     | 1                  | 1.35           | 124.4             | 0.302251           | -1.1965                |
| 5/25/2019 22:16 | 3:10:11    | 1                  | 1.33           | 144.36            | 0.258243           | -1.35385               |
| 5/25/2019       | 3:10:13    | 1                  | 1.41           | 146.97            | 0.262366           | -1.33801               |
| 5/26/2019 11:16 | 3:23:11    | 1                  | 1.57           | 184.74            | 0.222583           | -1.50245               |
| 5/26/2019 11:18 | 3:23:13    | 1                  | 1.51           | 178.01            | 0.225605           | -1.48897               |
| 5/27/2019 10:19 | 4:22:14    | 1                  | 1.74           | 248.15            | 0.176667           | -1.73349               |

**Figure S7. <sup>1</sup>H NMR Spectra at Reaction Time Points for Cysteamine and Lactam 49 with Internal Standard**

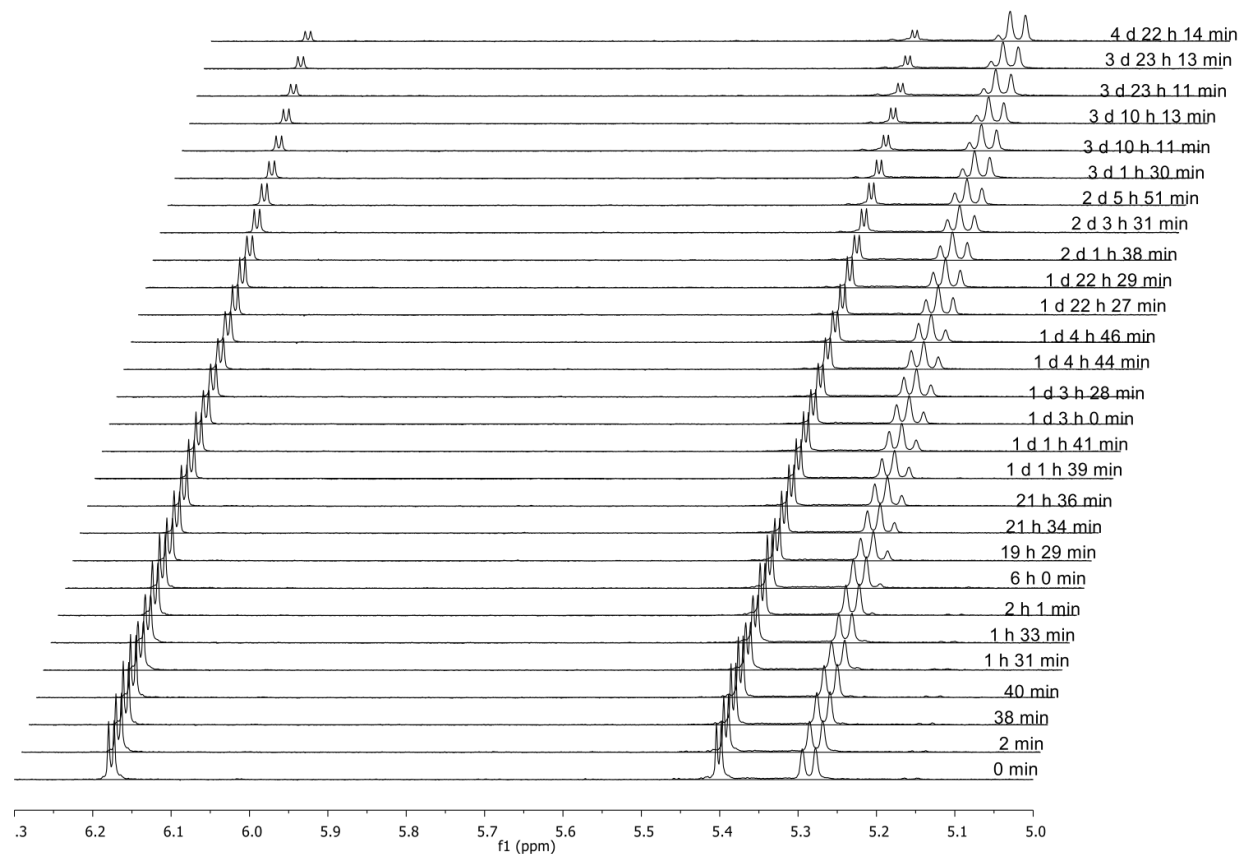

**Figure S8. Fraction Remaining Values Plotted Against Time Points for Lactam 49**

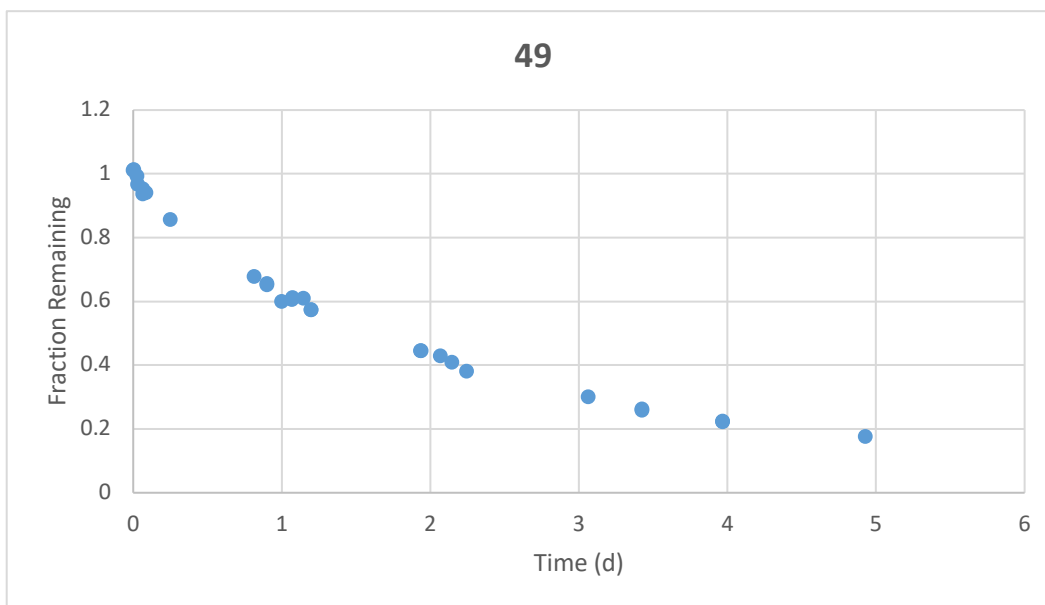

**Figure S9. ln(Fraction Remaining) Values Plotted Against Time Points for Lactam 49**

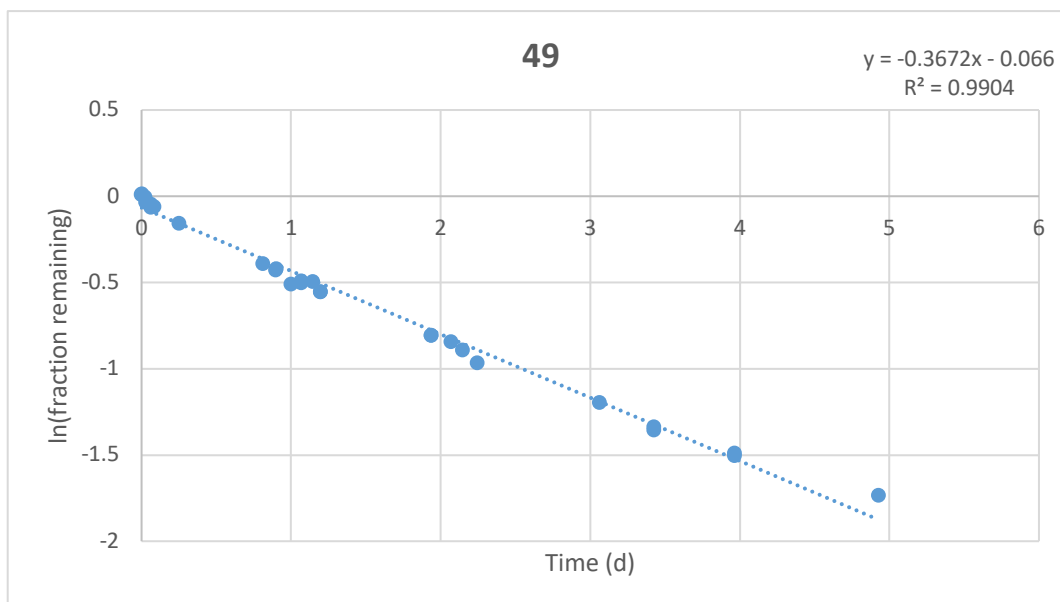

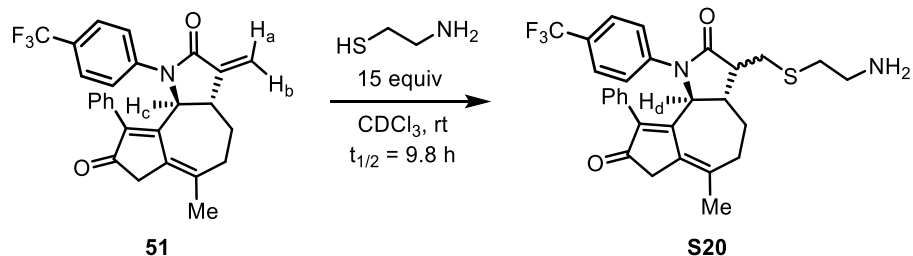

**Table S6. <sup>1</sup>H NMR Integration and ln(Fraction Remaining) Values Used to Determine Pseudo-first Order Rate Constant for Reaction of Cysteamine with Lactam 51**

| Time<br>m/dd/yy<br>hh:mm | Timepoint<br>d:h:min | Integration                 |                                         |                             | %rem     | ln%rem   |
|--------------------------|----------------------|-----------------------------|-----------------------------------------|-----------------------------|----------|----------|
|                          |                      | Proton<br>Ha<br>6.28<br>ppm | Proton<br>H <sub>b</sub><br>5.52<br>ppm | Proton<br>Hc+Hd<br>5.34 ppm |          |          |
| 5/14/18 13:38            | 0:0:02               | 1                           | 1                                       | 1.15                        | 0.869565 | -0.13976 |
| 5/14/18 14:55            | 0:1:19               | 1                           | 0.98                                    | 1.31                        | 0.755725 | -0.28008 |
| 5/14/18 15:43            | 0:2:07               | 1                           | 1.09                                    | 1.49                        | 0.701342 | -0.35476 |
| 5/14/18 16:42            | 0:3:06               | 1                           | 1.07                                    | 1.56                        | 0.663462 | -0.41028 |
| 5/14/18 16:51            | 0:3:15               | 1                           | 1.06                                    | 1.62                        | 0.635802 | -0.45287 |
| 5/14/18 16:53            | 0:3:17               | 1                           | 1                                       | 1.61                        | 0.621118 | -0.47623 |
| 5/15/18 2:25             | 0:12:49              | 1                           | 1.09                                    | 3.2                         | 0.326563 | -1.11913 |
| 5/15/18 8:44             | 0:19:08              | 1                           | 1.04                                    | 5.32                        | 0.191729 | -1.65167 |
| 5/15/18 9:40             | 0:20:04              | 1                           | 1.11                                    | 5.94                        | 0.177609 | -1.72817 |
| 5/15/18 10:43            | 0:21:07              | 1                           | 0.86                                    | 4.82                        | 0.192946 | -1.64534 |
| 5/15/18 11:32            | 0:21:56              | 1                           | 1.18                                    | 6.19                        | 0.17609  | -1.73676 |
| 5/15/18 12:34            | 0:22:58              | 1                           | 1.02                                    | 6.27                        | 0.161085 | -1.82583 |
| 5/15/18 14:37            | 1:0:59               | 1                           | 0.94                                    | 6.39                        | 0.1518   | -1.88519 |

**Figure S10.  $^1\text{H}$  NMR Spectra at Reaction Time Points for Cysteamine and Lactam 51**

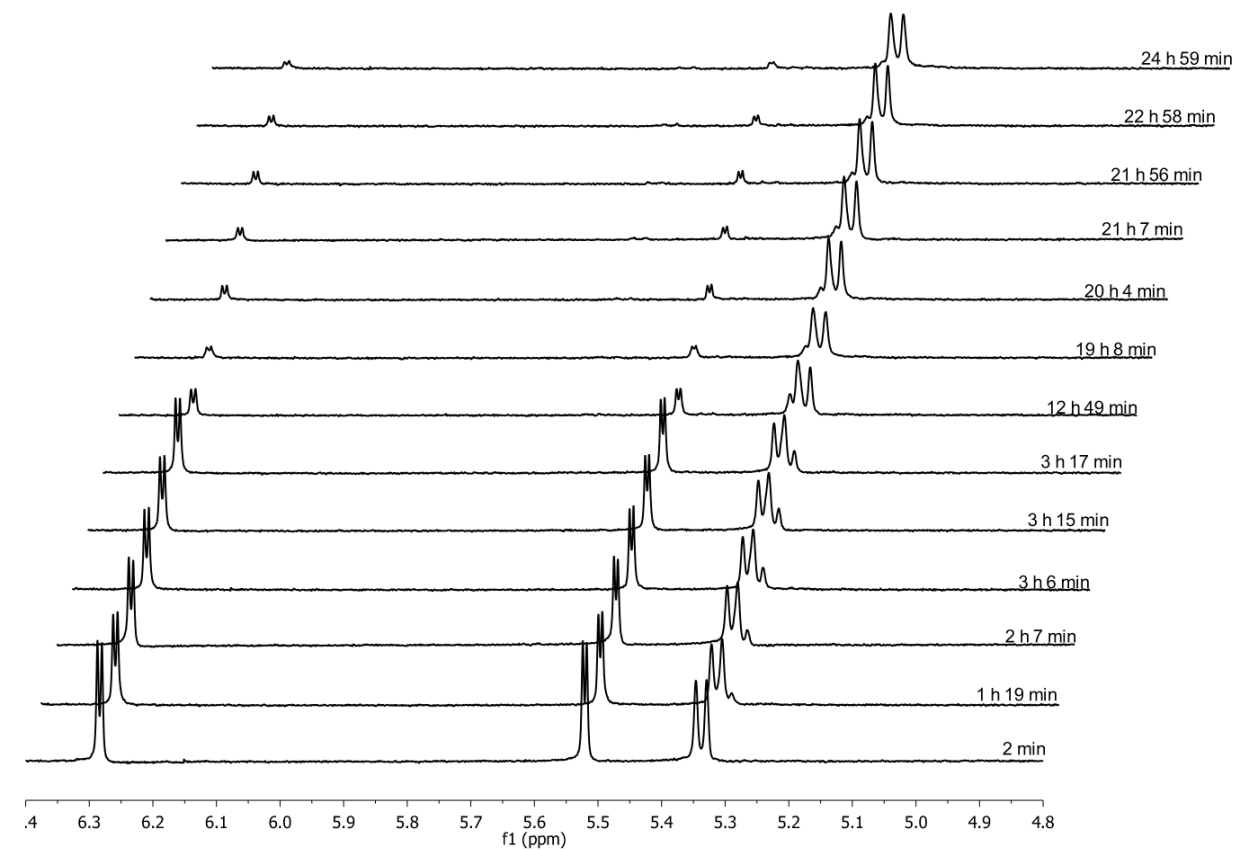



**Figure S11. Fraction Remaining Values Plotted Against Time Points for Lactam 51**

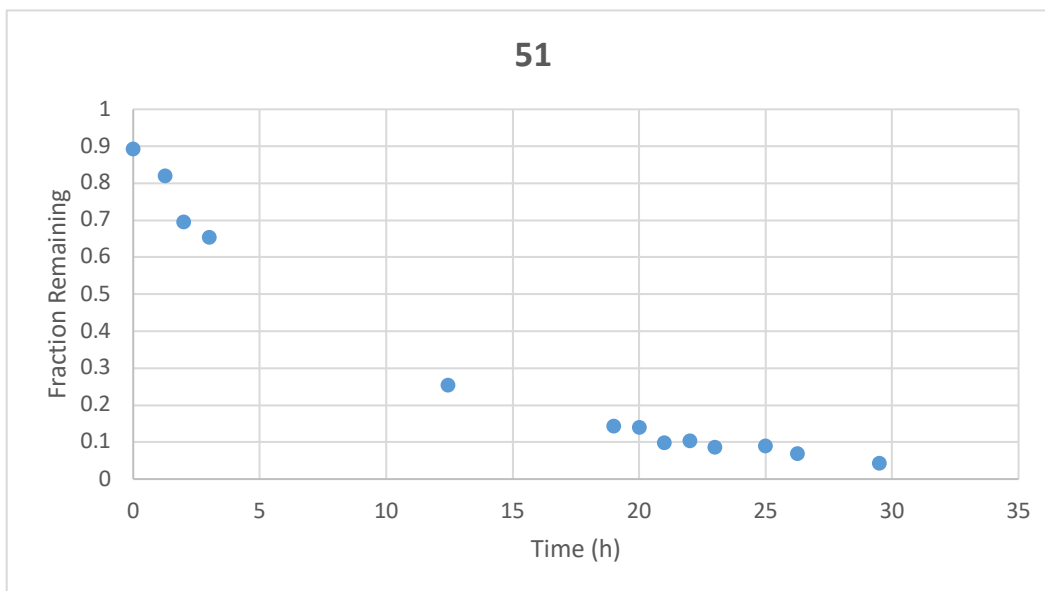

**Figure S12. ln(Fraction Remaining) Values Plotted Against Time Points for Lactam 51**

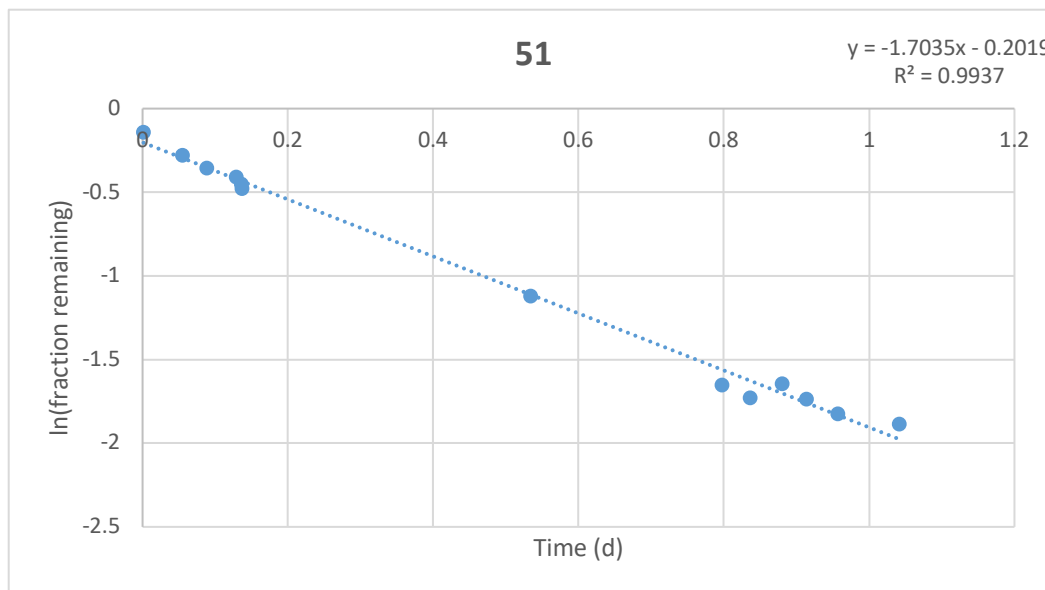

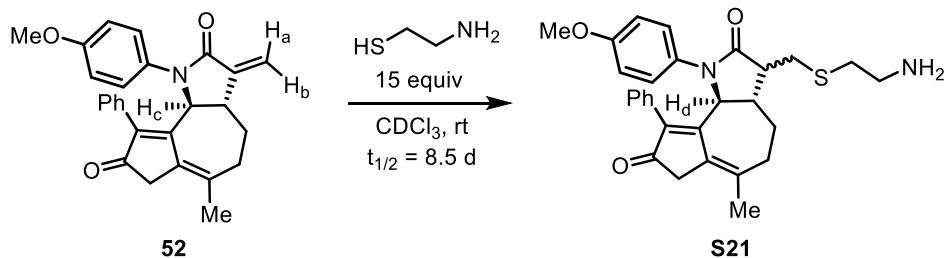

**Table S7. <sup>1</sup>H NMR Integration and ln(Fraction Remaining) Values Used to Determine Pseudo-first Order Rate Constant for Reaction of Cysteamine with Lactam 52**

| Time              | Time Point | Integration Values |                |                                | Fraction Remaining | ln(Fraction Remaining) |
|-------------------|------------|--------------------|----------------|--------------------------------|--------------------|------------------------|
|                   |            | H <sub>a</sub>     | H <sub>b</sub> | H <sub>c</sub> +H <sub>d</sub> |                    |                        |
| mm/dd/yy<br>hh:mm | d:h:min    | δ 6.22             | δ 5.45         | δ 5.31                         |                    |                        |
| 4/11/19 14:25     | 0:0:02     | 1                  | 1.03           | 1.06                           | 0.957547           | -0.04338               |
| 4/11/19 14:28     | 0:0:05     | 1                  | 1.04           | 1.09                           | 0.93578            | -0.06638               |
| 4/11/19 14:30     | 0:0:07     | 1                  | 1.03           | 1.07                           | 0.948598           | -0.05277               |
| 4/11/19 14:45     | 0:0:22     | 1                  | 1.03           | 1.09                           | 0.931193           | -0.07129               |
| 4/11/19 14:47     | 0:0:24     | 1                  | 1.03           | 1.09                           | 0.931193           | -0.07129               |
| 4/11/19 15:08     | 0:0:45     | 1                  | 1.03           | 1.09                           | 0.931193           | -0.07129               |
| 4/11/19 15:10     | 0:0:47     | 1                  | 1.03           | 1.07                           | 0.948598           | -0.05277               |
| 4/11/19 16:39     | 0:2:16     | 1                  | 1.06           | 1.1                            | 0.936364           | -0.06575               |
| 4/11/19 16:41     | 0:2:18     | 1                  | 1.05           | 1.12                           | 0.915179           | -0.08864               |
| 4/12/19 8:59      | 0:18:36    | 1                  | 1.09           | 1.23                           | 0.849593           | -0.163                 |
| 4/12/19 10:13     | 0:19:50    | 1                  | 1.09           | 1.26                           | 0.829365           | -0.18709               |
| 4/12/19 10:15     | 0:19:52    | 1                  | 1.03           | 1.23                           | 0.825203           | -0.19213               |
| 4/12/19 10:17     | 0:19:54    | 1                  | 1.05           | 1.2                            | 0.854167           | -0.15763               |
| 4/12/19 12:52     | 0:22:29    | 1                  | 1.04           | 1.21                           | 0.842975           | -0.17082               |
| 4/12/19 12:54     | 0:22:31    | 1                  | 1.05           | 1.26                           | 0.813492           | -0.20642               |
| 4/12/19 13:47     | 0:23:24    | 1                  | 1.05           | 1.25                           | 0.82               | -0.19845               |
| 4/12/19 16:04     | 1:1:41     | 1                  | 1.05           | 1.25                           | 0.82               | -0.19845               |
| 4/12/19 16:52     | 1:2:29     | 1                  | 1.07           | 1.26                           | 0.821429           | -0.19671               |
| 4/13/19 12:01     | 1:21:38    | 1                  | 1.07           | 1.32                           | 0.784091           | -0.24323               |
| 4/13/19 14:13     | 1:23:50    | 1                  | 1.09           | 1.34                           | 0.779851           | -0.24865               |
| 4/13/19 17:46     | 2:3:23     | 1                  | 1.04           | 1.26                           | 0.809524           | -0.21131               |
| 4/13/19 17:48     | 2:3:25     | 1                  | 1.05           | 1.27                           | 0.807087           | -0.21432               |
| 4/14/19 12:29     | 2:22:06    | 1                  | 1.06           | 1.38                           | 0.746377           | -0.29252               |
| 4/14/19 12:32     | 2:22:09    | 1                  | 1.09           | 1.4                            | 0.746429           | -0.29246               |
| 4/15/19 10:10     | 3:19:47    | 1                  | 1.09           | 1.56                           | 0.669872           | -0.40067               |
| 4/15/19 10:13     | 3:19:50    | 1                  | 1.07           | 1.54                           | 0.672078           | -0.39738               |
| 4/15/19 13:54     | 3:23:31    | 1                  | 1.08           | 1.6                            | 0.65               | -0.43078               |
| 4/16/19 9:37      | 4:19:14    | 1                  | 1.08           | 1.64                           | 0.634146           | -0.45548               |

|               |         |   |      |      |          |          |
|---------------|---------|---|------|------|----------|----------|
| 4/16/19 11:51 | 4:21:28 | 1 | 1.09 | 1.67 | 0.625749 | -0.46881 |
| 4/16/19 17:27 | 5:3:04  | 1 | 1.08 | 1.7  | 0.611765 | -0.49141 |
| 4/16/19 21:07 | 5:6:44  | 1 | 1.11 | 1.76 | 0.599432 | -0.51177 |
| 4/17/19 10:14 | 5:19:51 | 1 | 1.11 | 1.84 | 0.57337  | -0.55622 |

**Figure S13. <sup>1</sup>H NMR Spectra at Reaction Time Points for Cysteamine and Lactam 52**

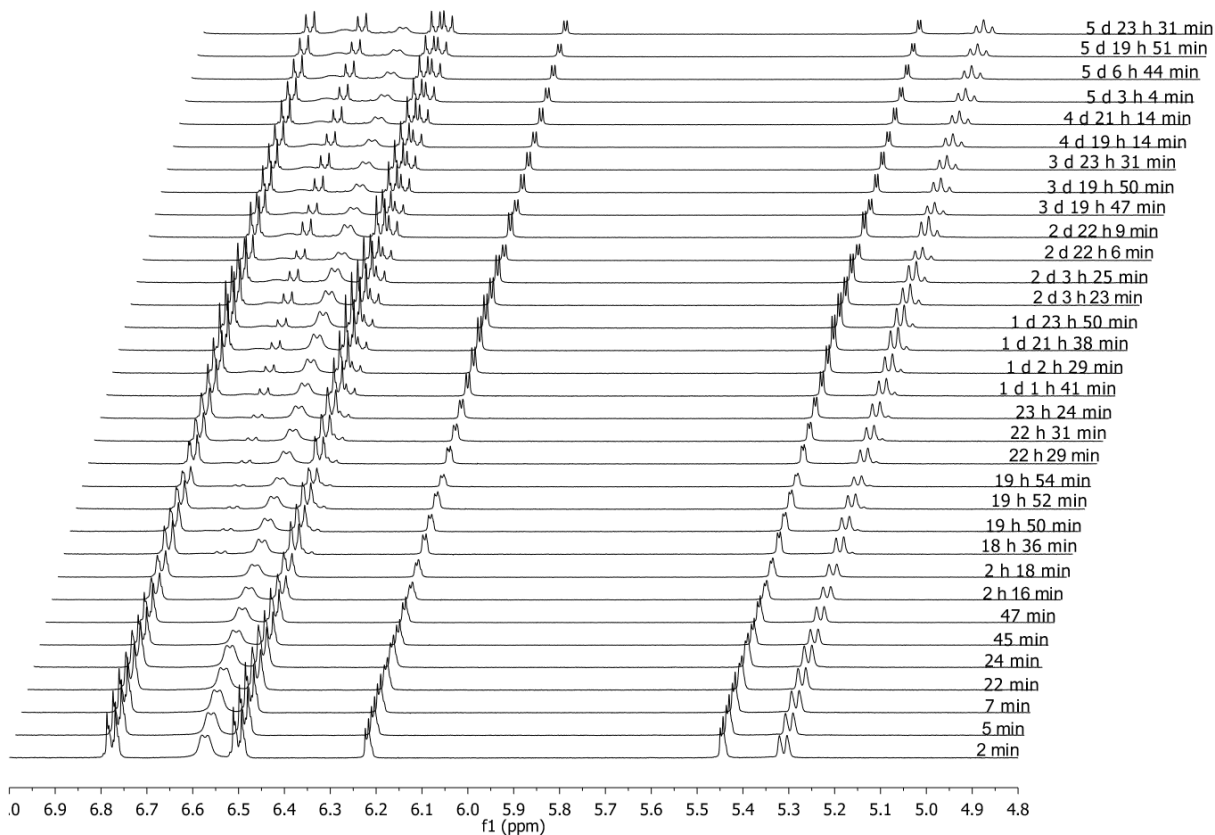

**Figure S14. Fraction Remaining Values Plotted Against Time Points for Lactam 52**

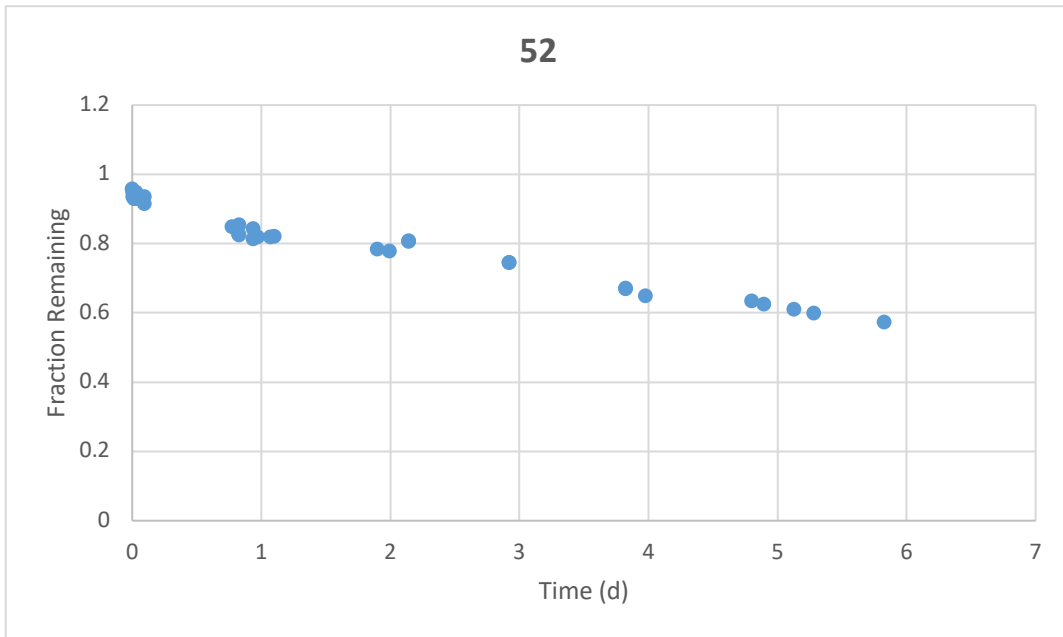

**Figure S15. ln(Fraction Remaining) Values Plotted Against Time Points for Lactam 52**

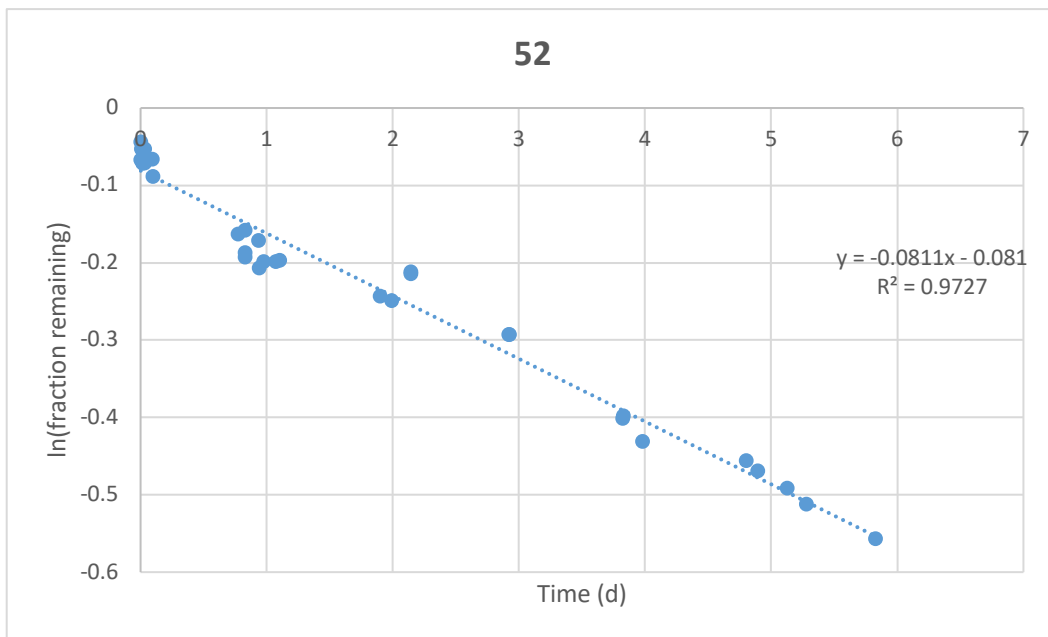

**Table S8. <sup>1</sup>H NMR Integration and ln(Fraction Remaining) Values Used to Determine Pseudo-first Order Rate Constant for Reaction of Cysteamine with Lactam 52 with Internal Standard**

| Time             | Time Point | Integration Values |                |                   | Fraction Remaining | ln(Fraction Remaining) |
|------------------|------------|--------------------|----------------|-------------------|--------------------|------------------------|
|                  |            | H <sub>a</sub>     | H <sub>b</sub> | Internal standard |                    |                        |
| m/dd/yy<br>hh:mm | d:h:min    | δ 6.22             | δ 5.45         | δ 2.20            |                    |                        |
| 5/3/2019 16:19   | 0:0:00     | 1                  | 1.02           | 17.83             | 1.01963            | 0.01944                |
| 5/4/2019 12:07   | 0:19:48    | 1                  | 1.07           | 20.23             | 0.92091            | -0.08239               |
| 5/4/2019 15:05   | 0:22:46    | 1                  | 1.13           | 20.6              | 0.930583           | -0.07194               |
| 5/4/2019 15:07   | 0:22:48    | 1                  | 1.05           | 20.63             | 0.894329           | -0.11168               |
| 5/6/2019 9:51    | 2:17:32    | 1                  | 1.12           | 25.26             | 0.755344           | -0.28058               |
| 5/7/2019 13:30   | 3:21:11    | 1                  | 1.19           | 27.59             | 0.714389           | -0.33633               |
| 5/8/2019 13:42   | 4:21:23    | 1                  | 1.03           | 28.02             | 0.652034           | -0.42766               |
| 5/9/2019 8:14    | 5:15:55    | 1                  | 1.12           | 32.13             | 0.593838           | -0.52115               |
| 5/9/2019 14:34   | 5:22:15    | 1                  | 1.22           | 34.19             | 0.584381           | -0.5372                |
| 5/10/2019 4:08   | 6:11:49    | 1                  | 1.31           | 36.35             | 0.571939           | -0.55872               |

**Figure S16.  $^1\text{H}$  NMR Spectra at Reaction Time Points for Cysteamine and Lactam 52 with Internal Standard**

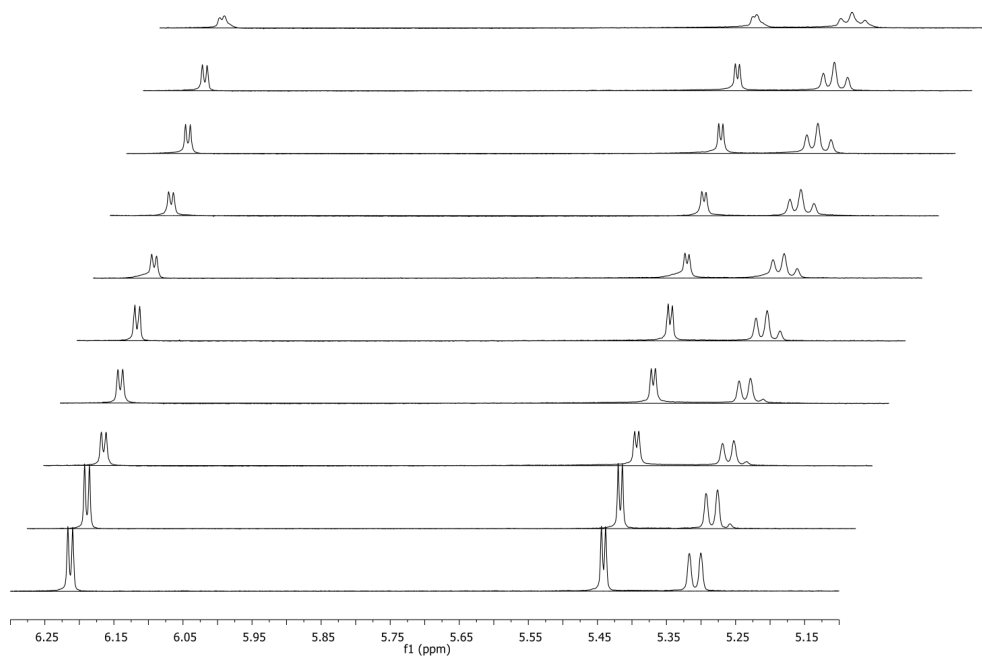

**Figure S17. Fraction Remaining Values Plotted Against Time Points for Lactam 52 with Internal Standard**

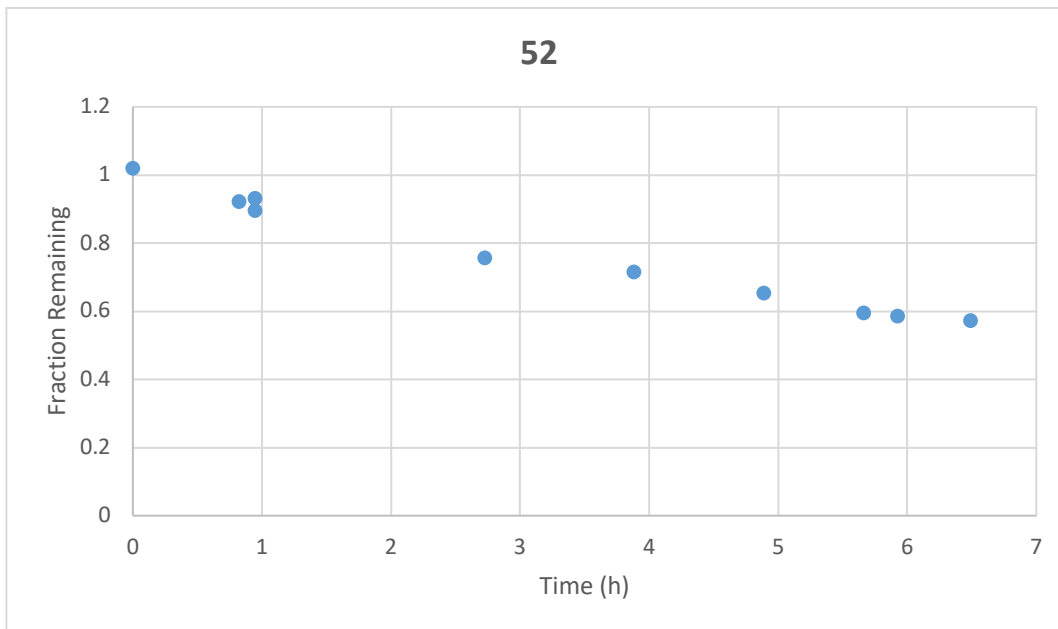

**Figure S18. ln(Fraction Remaining) Values Plotted Against Time Points for Lactam 52 with Internal Standard**

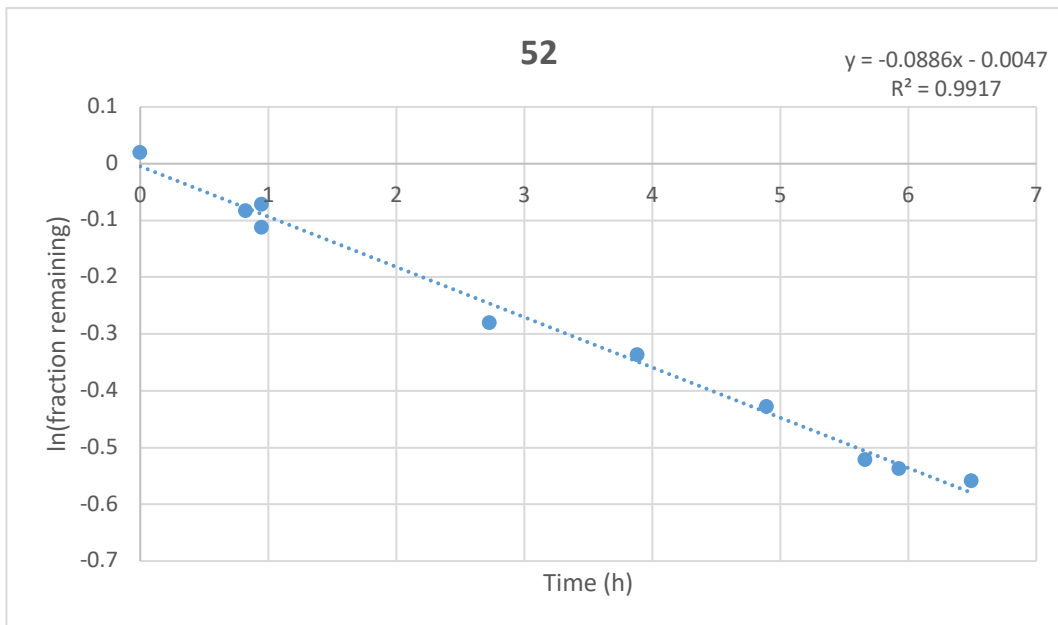

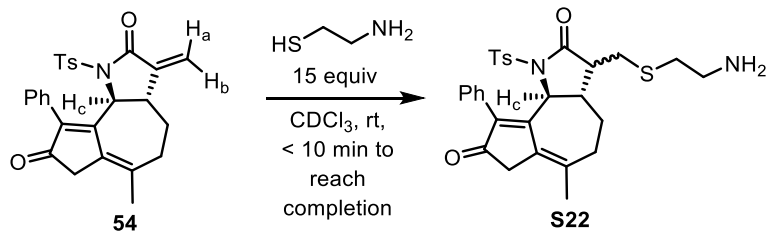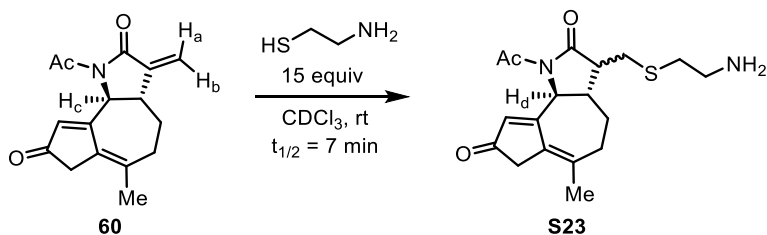

**Table S9. <sup>1</sup>H NMR Integration and ln(Fraction Remaining) Values Used to Determine Pseudo-first Order Rate Constant for Reaction of Cysteamine with Lactam 60**

| Time<br>m/dd/yy<br>hh:mm | Time<br>Point<br>min | Integration Values |                |                                | Fraction<br>Remaining | ln(Fraction<br>Remaining) |
|--------------------------|----------------------|--------------------|----------------|--------------------------------|-----------------------|---------------------------|
|                          |                      | H <sub>a</sub>     | H <sub>b</sub> | H <sub>c</sub> +H <sub>d</sub> |                       |                           |
|                          |                      | δ 6.28             | δ 5.50         | δ 5.06                         |                       |                           |
| 5/17/18 15:12            | 4                    | 1                  | 0.82           | 2.17                           | 0.419354839           | -0.869037847              |
| 5/17/18 15:14            | 6                    | 1                  | 1.07           | 3.5                            | 0.295714286           | -1.218361542              |
| 5/17/18 15:16            | 8                    | 1                  | 0.83           | 3.81                           | 0.24015748            | -1.426460403              |

**Figure S19. <sup>1</sup>H NMR Spectra at Reaction Time Points for Cysteamine and Lactam 60**

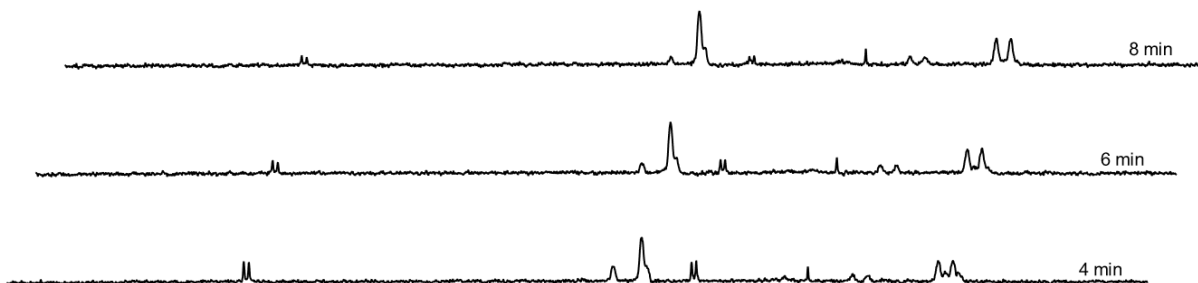



**Figure S20. Fraction Remaining Values Plotted Against Time Points for Lactam 60**

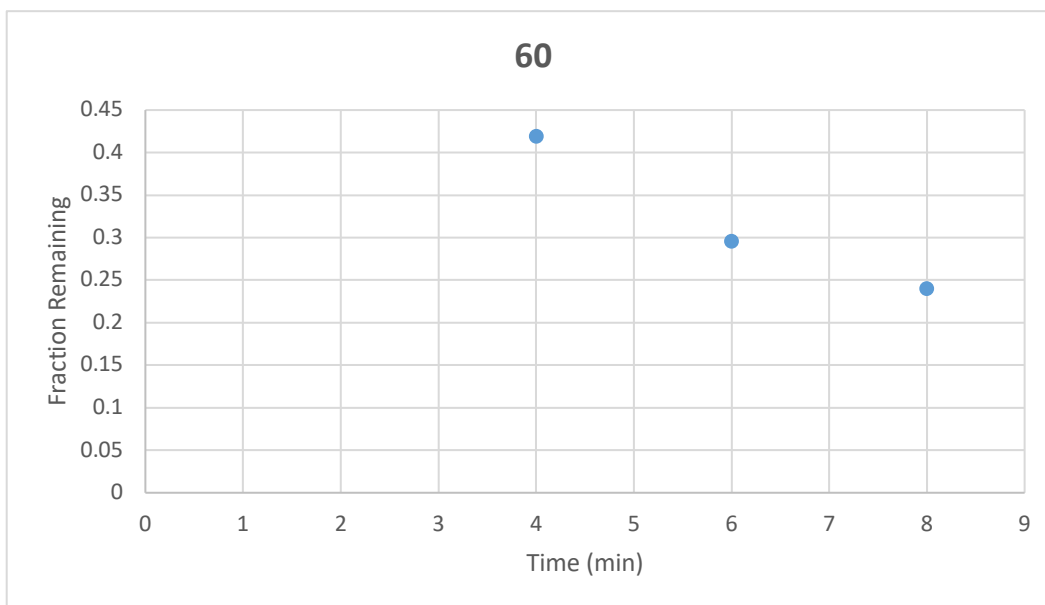

**Figure S21. ln(Fraction Remaining) Values Plotted Against Time Points for Lactam 60**

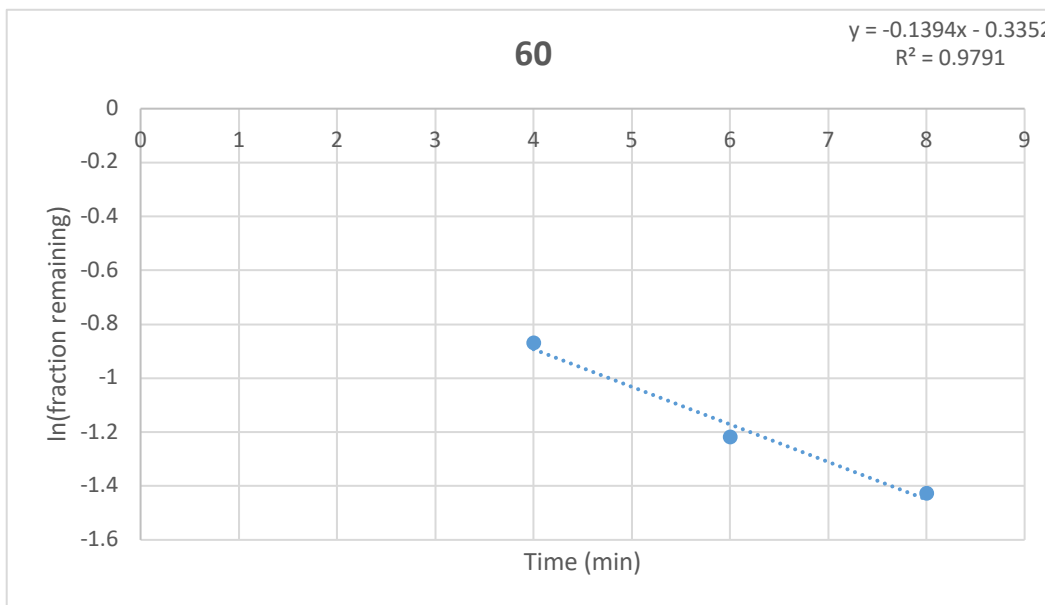

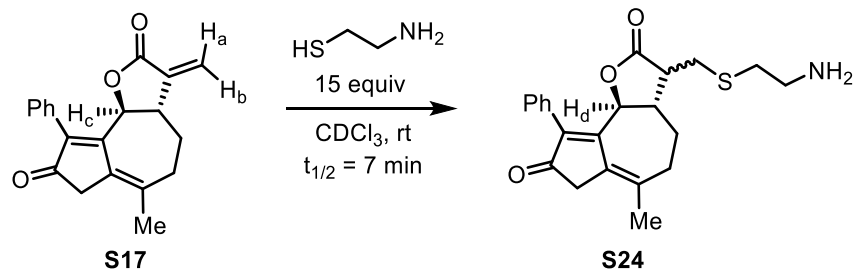

**Table S10.**  $^1\text{H}$  NMR Integration and  $\ln(\text{Fraction Remaining})$  Values Used to Determine Pseudo-first Order Rate Constant for Reaction of Cysteamine with Lactone S17

| Time Point<br>min | Integration Values |                |                                | Fraction Remaining | $\ln(\text{Fraction Remaining})$ |
|-------------------|--------------------|----------------|--------------------------------|--------------------|----------------------------------|
|                   | H <sub>a</sub>     | H <sub>b</sub> | H <sub>c</sub> +H <sub>d</sub> |                    |                                  |
|                   | $\delta$ 6.22      | $\delta$ 5.53  | $\delta$ 5.45                  |                    |                                  |
| 3                 | 1                  | 1              | 1.15                           | 0.869565           | -0.13976                         |
| 6                 | 1                  | 0.98           | 1.31                           | 0.755725           | -0.28008                         |
| 8                 | 1                  | 1.09           | 1.49                           | 0.701342           | -0.35476                         |
| 10                | 1                  | 1.07           | 1.56                           | 0.663462           | -0.41028                         |
| 12                | 1                  | 1.06           | 1.62                           | 0.635802           | -0.45287                         |
| 14                | 1                  | 1              | 1.61                           | 0.621118           | -0.47623                         |
| 17                | 1                  | 1.09           | 3.2                            | 0.326563           | -1.11913                         |
| 19                | 1                  | 1.04           | 5.32                           | 0.191729           | -1.65167                         |
| 21                | 1                  | 1.11           | 5.94                           | 0.177609           | -1.72817                         |
| 24                | 1                  | 0.86           | 4.82                           | 0.192946           | -1.64534                         |
| 26                | 1                  | 1.18           | 6.19                           | 0.17609            | -1.73676                         |
| 28                | 1                  | 1.02           | 6.27                           | 0.161085           | -1.82583                         |
| 30                | 1                  | 0.94           | 6.39                           | 0.1518             | -1.88519                         |

Figure 22.  $^1\text{H}$  NMR Spectra at Reaction Time Points for Cysteamine and Lactone S17

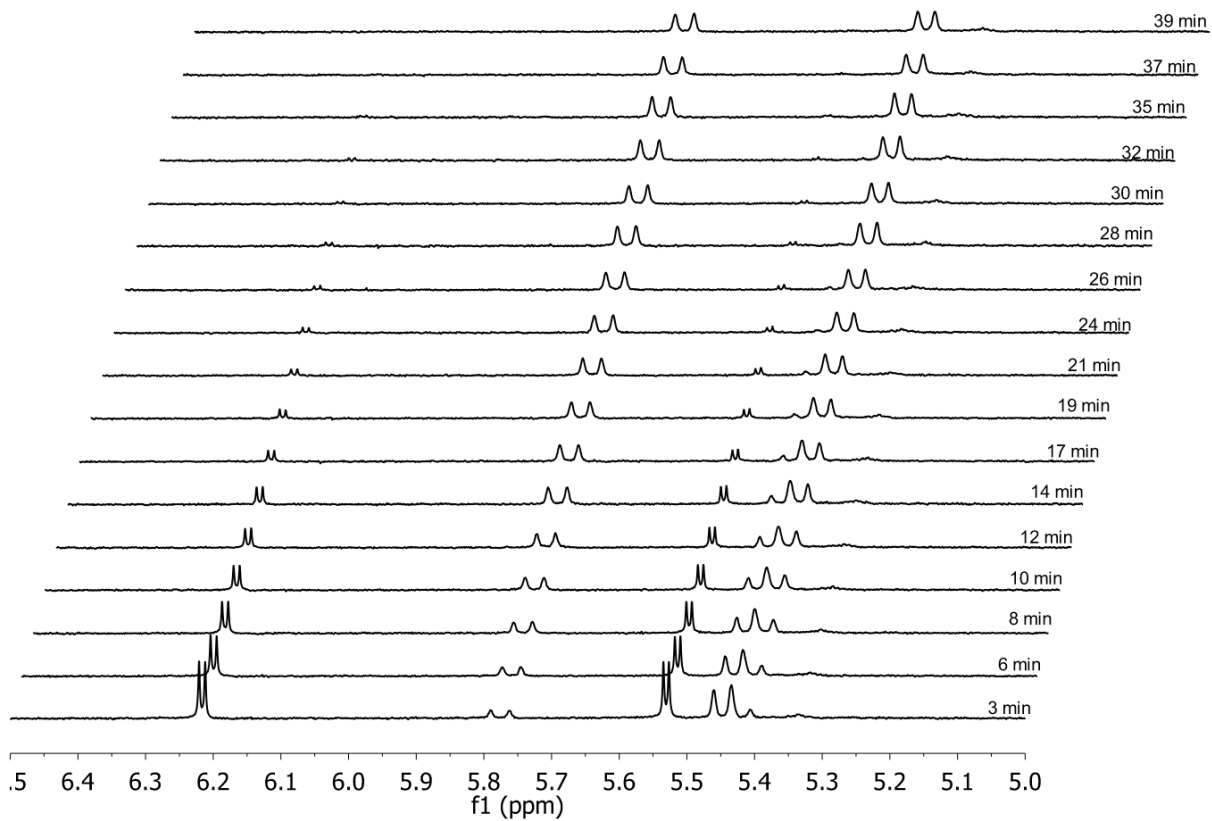

**Figure S23. Fraction Remaining Values Plotted Against Time Points for Lactone S17**

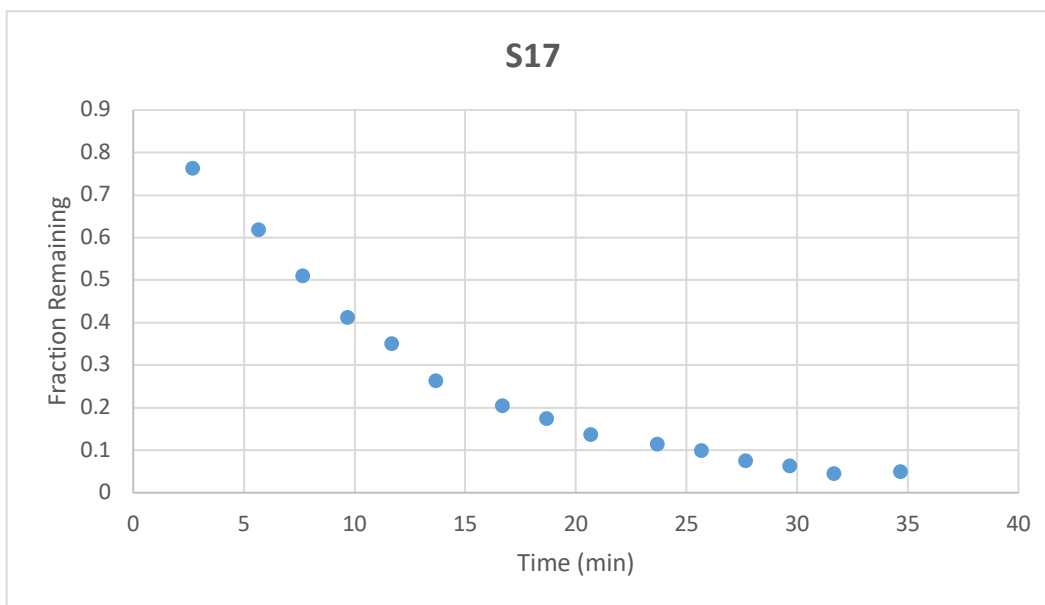

**Figure S24. ln(Fraction Remaining) Values Plotted Against Time Points for Lactone S17**

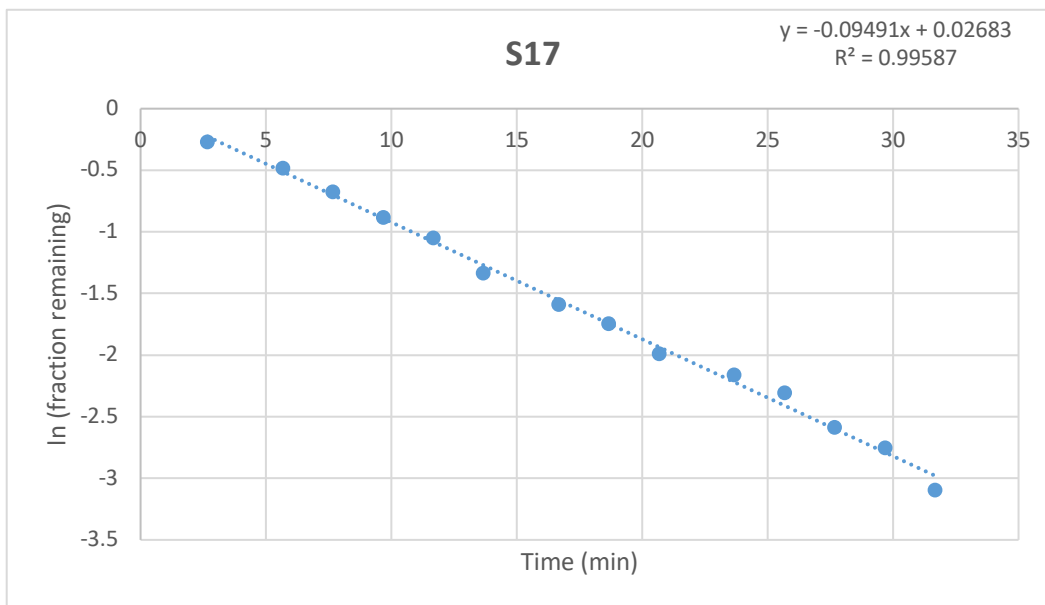

## Biological Materials and Methods

**Table S11.** HPLC purities of compounds.

| Compound  | Retention Time (min) | Purity (%) |
|-----------|----------------------|------------|
| <b>45</b> | 14.8                 | >99        |
| <b>47</b> | 11.0                 | 98.4       |
| <b>48</b> | 15.2                 | 95.8       |
| <b>49</b> | 20.1                 | 95.6       |
| <b>51</b> | 22.5                 | 93.6       |
| <b>52</b> | 19.1                 | 92.1       |
| <b>54</b> | 20.2                 | 91.0       |
| <b>60</b> | 13.3                 | 98.6       |

**Figure S25.** HPLC trace of **45**, > 99% pure. RT = 14.8 min. Peak at 1.5-3 min is DMSO.

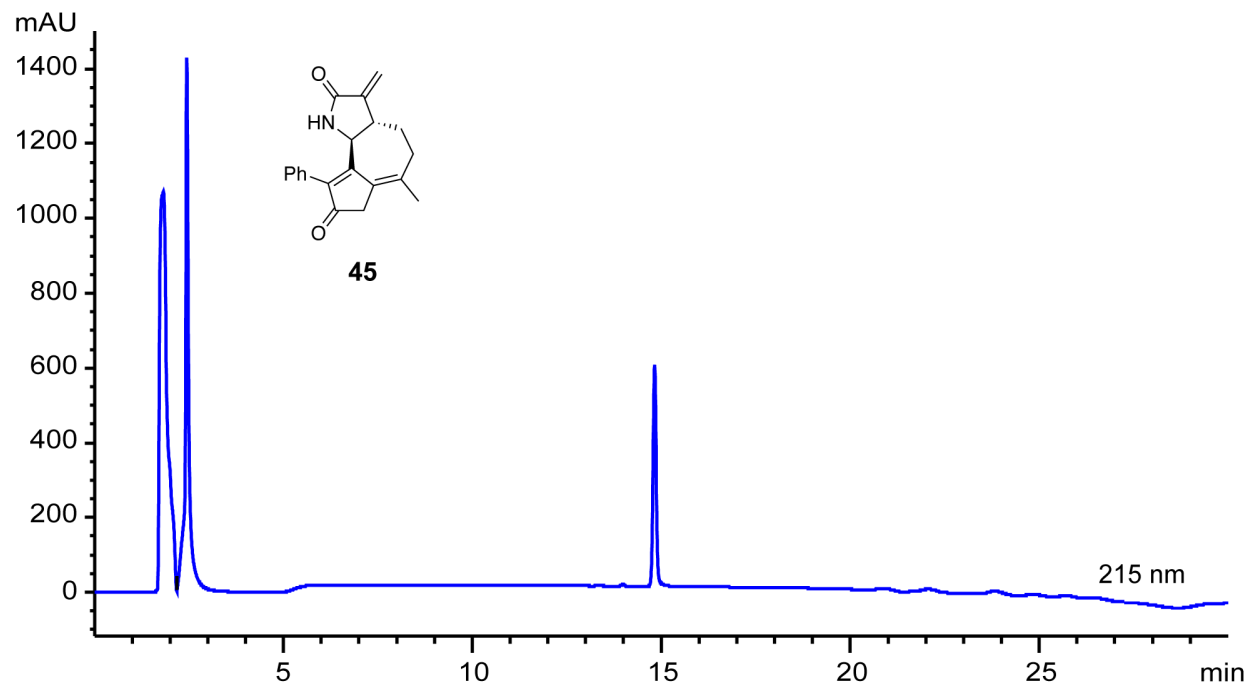

**Figure S26.** HPLC trace of **47**, 98.4% pure. RT = 11.0 min. Peak at 1.5-3 min is DMSO. The peak at 18.0 min appears in the blank run, and was excluded from purity analysis.

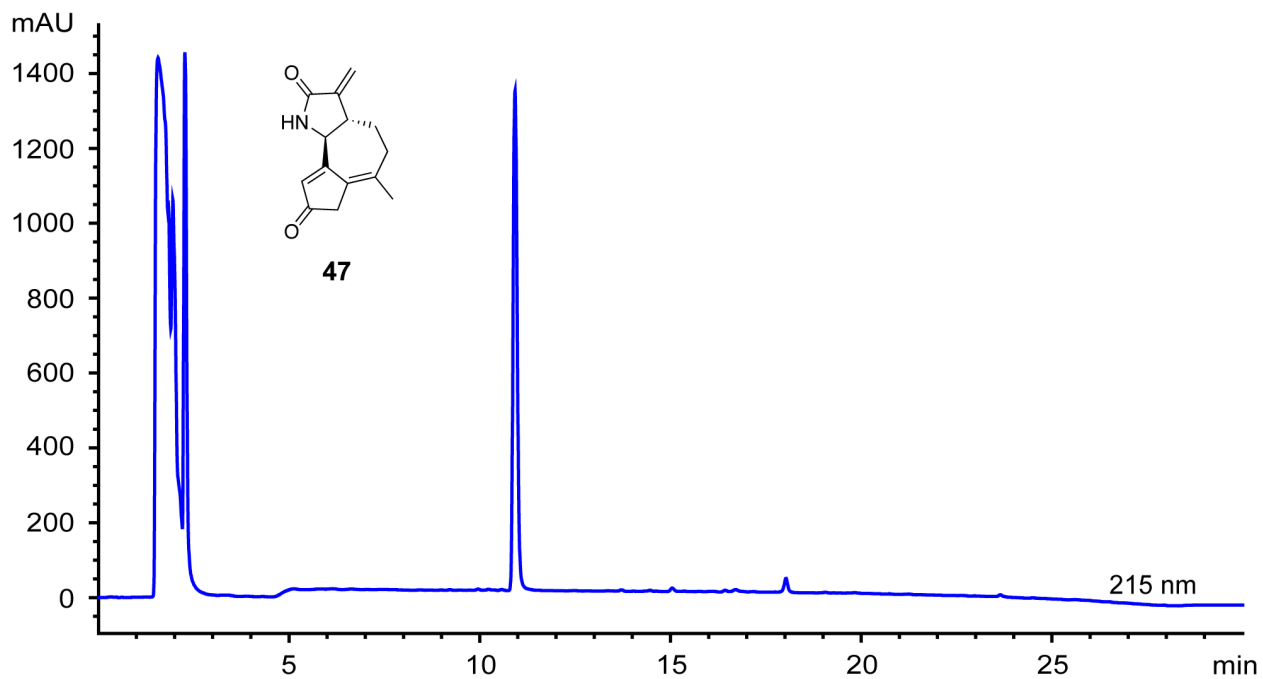

**Figure S27.** HPLC trace of **48**, 95.8% pure. RT = 15.2 min. Peak at 1.5-3 min is DMSO. The peak at 18.0 min appears in the blank run, and was excluded from purity analysis.

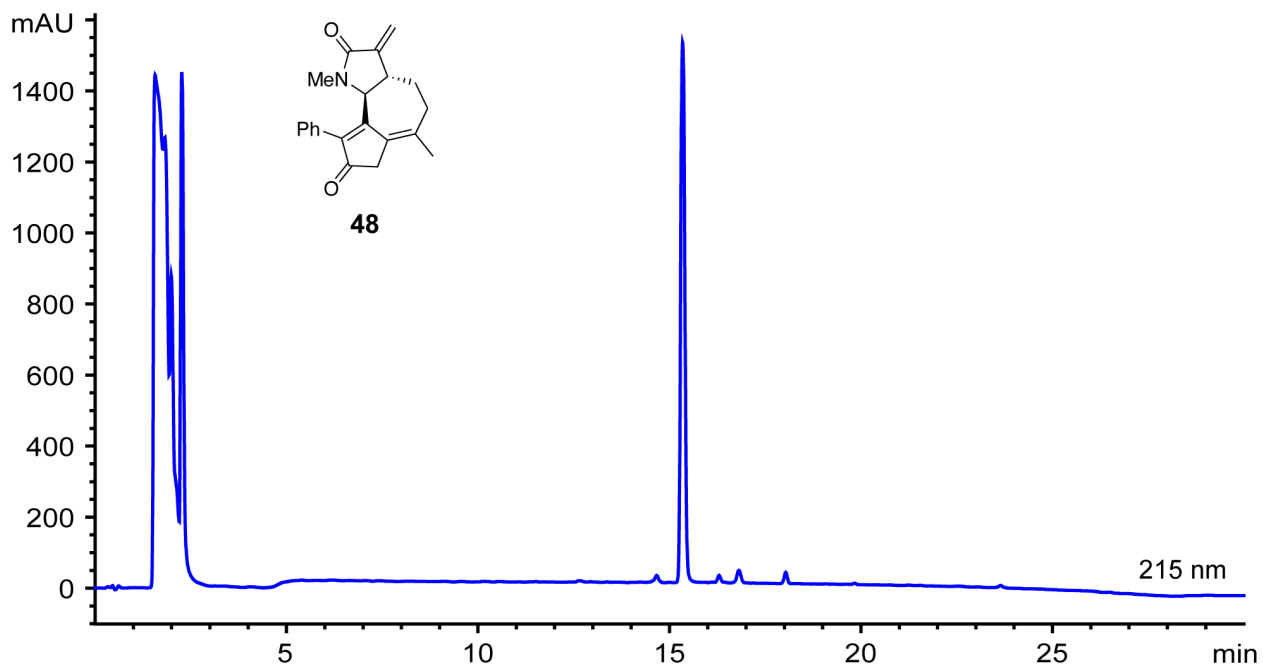

**Figure S28.** HPLC trace of **49**, 95.6% pure. RT = 20.1 min. The peak at 18.0 min appears in the blank run, and was excluded from purity analysis.

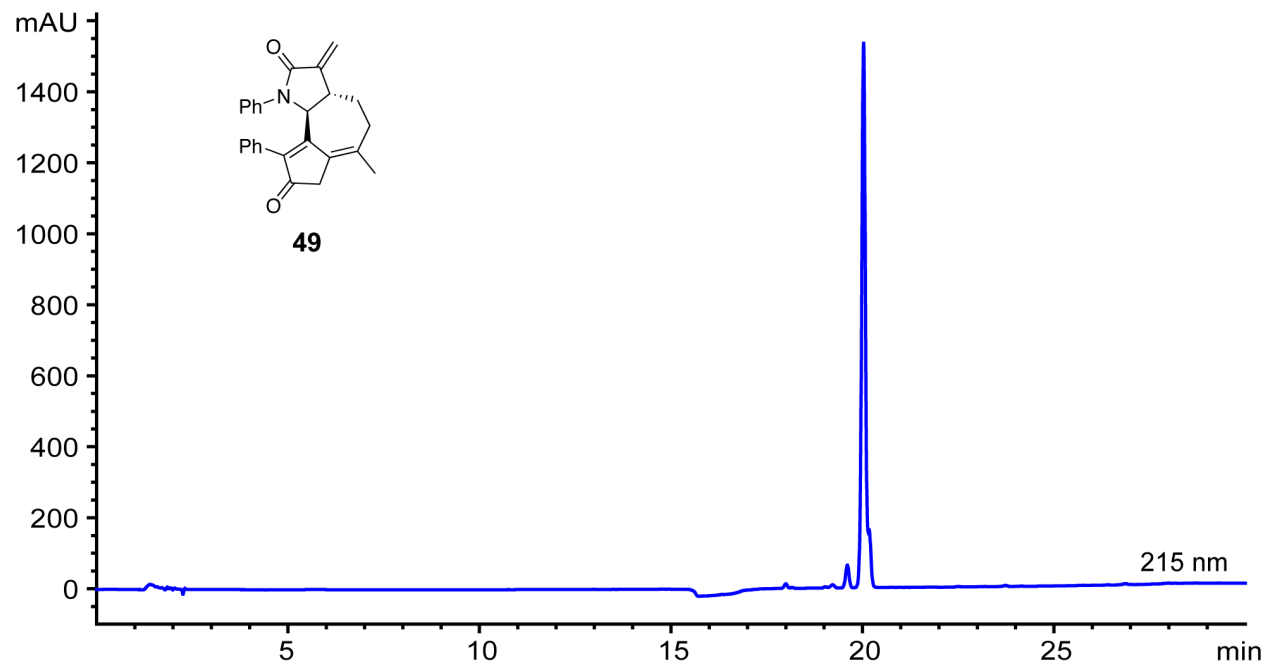

**Figure S29.** HPLC trace of **51**, 93.6% pure. RT = 22.5 min.

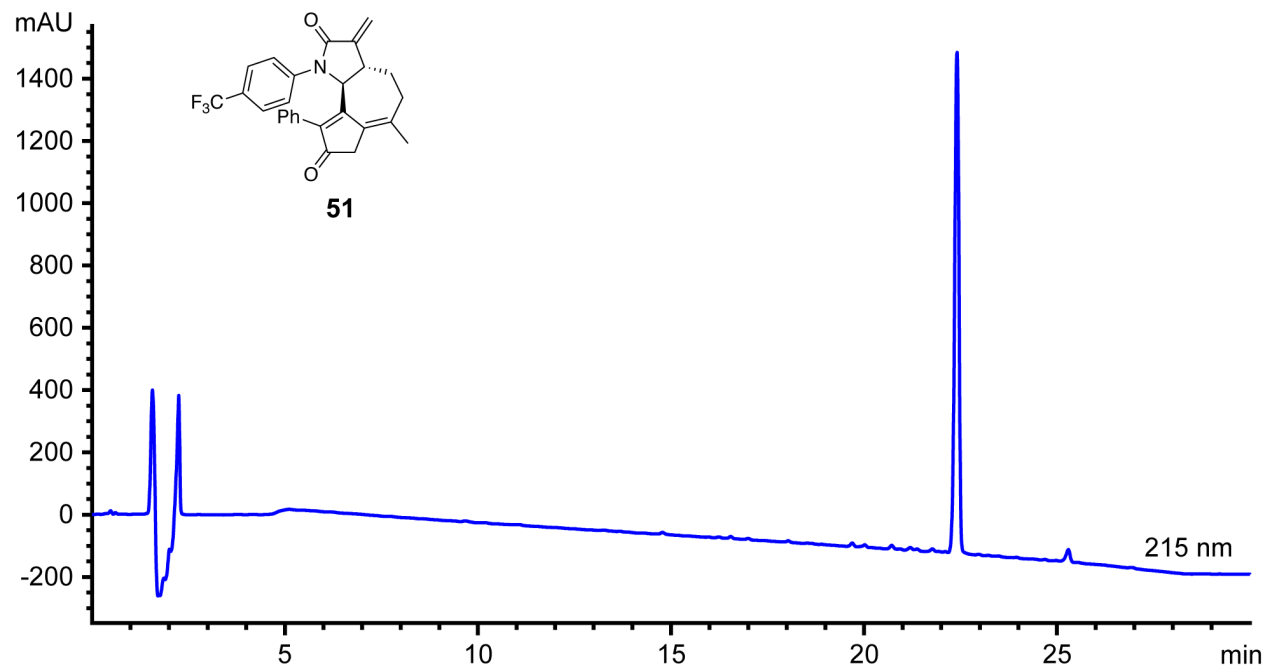

**Figure S30.** HPLC trace of **52**, 92.1% pure, RT = 19.1 min. Peak at 1.5-3 min is DMSO.

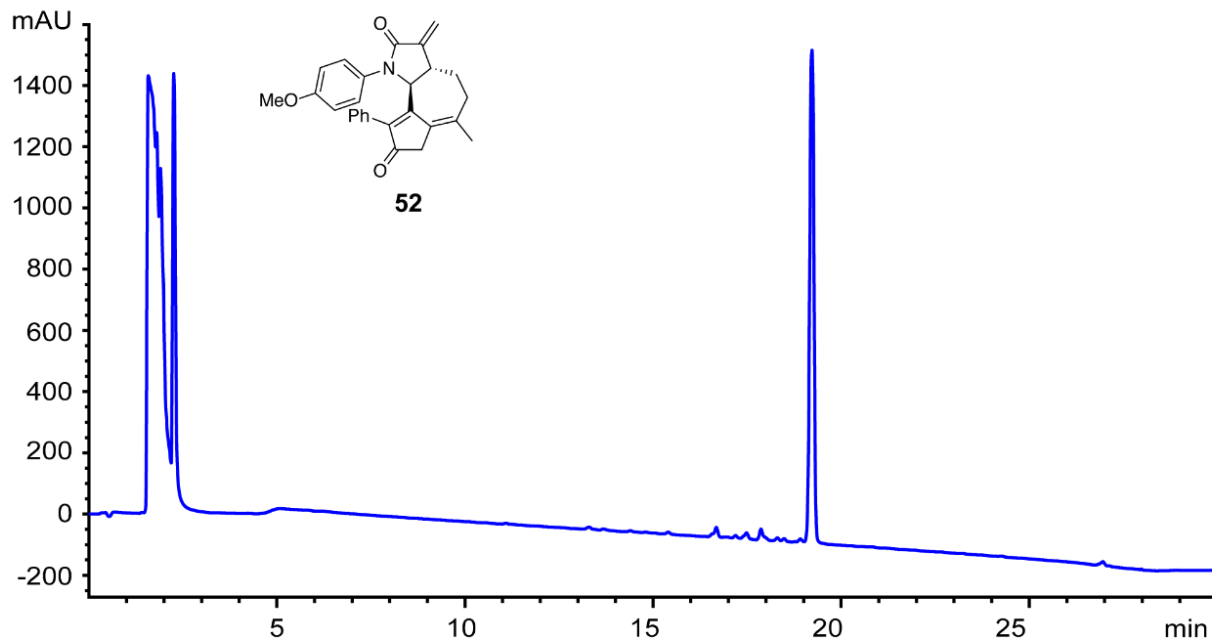

**Figure S31.** HPLC trace of **54**, 91.0% pure. RT = 20.2 min.

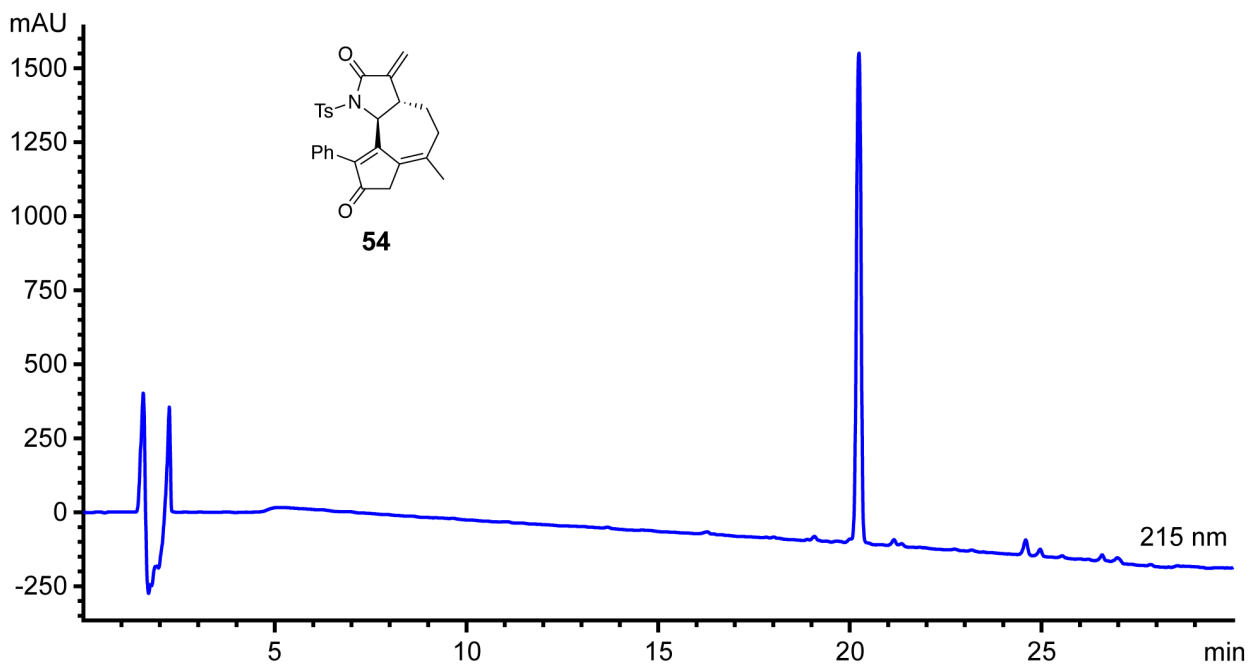



**Figure S32.** HPLC trace of **60**, 98.6% pure. RT = 13.3 min.

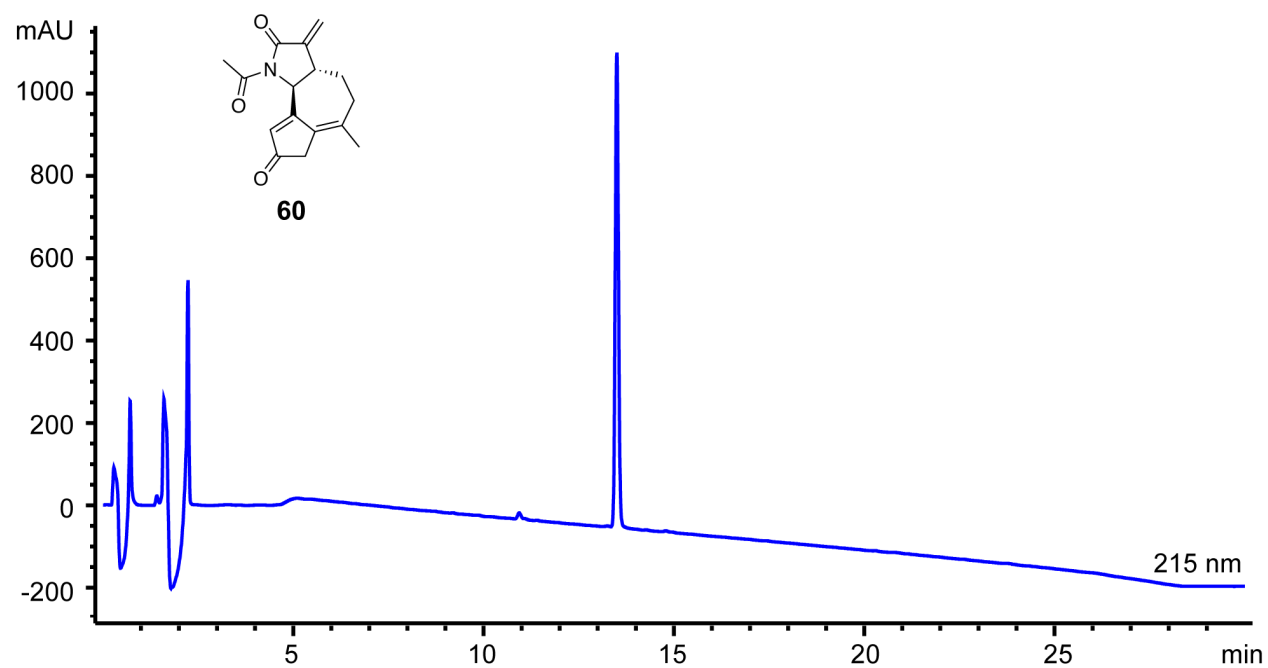

**Figure S33.** 4-15% SDS-PAGE analysis of La antigen protein expression, stained with Coomassie blue.

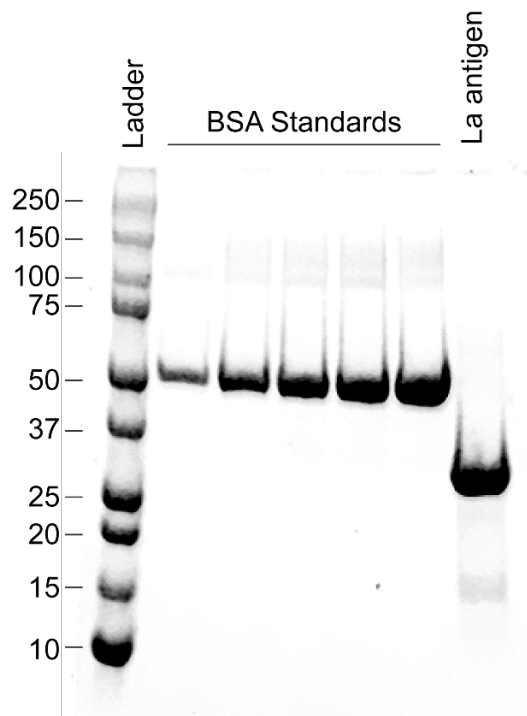

**Table S12.** Observed adducts from La Antigen mass spectrometry MS/MS analysis. Listed are the cysteine adducts identified for the three peptides searched. IAD = carbamidomethylation, D2-IAD = d<sub>2</sub>-carbamidomethylation. Fluconazole and CPM are the same negative and positive controls, respectively, used in the ALARM NMR assay. N/A indicated the peptide was not identified. Samples included three biological replicates analyzed each in technical triplicate.

| Sample | Compound | SLEEKIGC <sup>232</sup> LLK | IGC <sup>232</sup> LLK | FSGDLDDQTC <sup>245</sup> R |
|--------|----------|-----------------------------|------------------------|-----------------------------|
| S1_1   | DMSO     | IAD/D2-IAD                  | D2-IAD                 | N/A                         |
| S1_2   |          | IAD/D2-IAD                  | D2-IAD                 | IAD                         |
| S1_3   |          | IAD/D2-IAD                  | N/A                    | IAD                         |
| S2_1   | DMSO     | IAD/D2-IAD                  | IAD/D2-IAD             | IAD                         |
| S2_2   |          | IAD/D2-IAD                  | IAD/D2-IAD             | IAD                         |
| S2_3   |          | IAD/D2-IAD                  | IAD/D2-IAD             | IAD                         |
| S3_1   | DMSO     | D2-IAD                      | IAD/D2-IAD             | IAD                         |
| S3_2   |          | IAD/D2-IAD                  | IAD/D2-IAD             | IAD                         |
| S3_3   |          | IAD/D2-IAD                  | IAD/D2-IAD             | IAD                         |

|       |             |            |               |        |
|-------|-------------|------------|---------------|--------|
| S4_1  | Fluconazole | IAD/D2-IAD | D2-IAD        | IAD    |
| S4_2  |             | IAD/D2-IAD | D2-IAD        | IAD    |
| S4_3  |             | IAD/D2-IAD | D2-IAD        | IAD    |
| S5_1  | Fluconazole | IAD/D2-IAD | IAD/D2-IAD    | IAD    |
| S5_2  |             | IAD/D2-IAD | D2-IAD        | IAD    |
| S5_3  |             | IAD/D2-IAD | D2-IAD        | IAD    |
| S6_1  | Fluconazole | IAD/D2-IAD | D2-IAD        | IAD    |
| S6_2  |             | IAD/D2-IAD | IAD/D2-IAD    | IAD    |
| S6_3  |             | IAD/D2-IAD | D2-IAD        | IAD    |
| S7_1  | CPM         | D2-IAD     | D2-IAD/CPM    | D2-IAD |
| S7_2  |             | D2-IAD/CPM | D2-IAD/CPM    | D2-IAD |
| S7_3  |             | D2-IAD/CPM | D2-IAD/CPM    | D2-IAD |
| S8_1  | CPM         | D2-IAD/CPM | D2-IAD/CPM    | D2-IAD |
| S8_2  |             | D2-IAD/CPM | D2-IAD/CPM    | D2-IAD |
| S8_3  |             | D2-IAD/CPM | D2-IAD/CPM    | D2-IAD |
| S9_1  | CPM         | D2-IAD/CPM | D2-IAD/CPM    | N/A    |
| S9_2  |             | D2-IAD/CPM | D2-IAD/CPM    | N/A    |
| S9_3  |             | D2-IAD/CPM | D2-IAD/CPM    | N/A    |
| S10_1 | <b>S17</b>  | D2-IAD     | D2-IAD/S17    | D2-IAD |
| S10_2 |             | D2-IAD/S17 | D2-IAD/S17    | D2-IAD |
| S10_3 |             | D2-IAD/S17 | D2-IAD/S17    | D2-IAD |
| S11_1 | <b>S17</b>  | D2-IAD/S17 | D2-IAD/S17    | D2-IAD |
| S11_2 |             | D2-IAD/S17 | D2-IAD/S17    | D2-IAD |
| S11_3 |             | D2-IAD/S17 | D2-IAD/S17    | D2-IAD |
| S12_1 | <b>S17</b>  | D2-IAD/S17 | D2-IAD/S17    | D2-IAD |
| S12_2 |             | D2-IAD/S17 | D2-IAD/S17    | D2-IAD |
| S12_3 |             | D2-IAD/S17 | D2-IAD/S17    | D2-IAD |
| S13_1 | <b>51</b>   | IAD        | IAD/D2-IAD    | IAD    |
| S13_2 |             | IAD/D2-IAD | IAD/D2-IAD    | IAD    |
| S13_3 |             | IAD        | IAD/D2-IAD    | IAD    |
| S14_1 | <b>51</b>   | IAD/D2-IAD | D2-IAD/51     | IAD    |
| S14_2 |             | IAD/D2-IAD | D2-IAD        | IAD    |
| S14_3 |             | IAD/D2-IAD | D2-IAD/51     | IAD    |
| S15_1 | <b>51</b>   | IAD/D2-IAD | IAD/D2-IAD/51 | IAD    |
| S15_2 |             | IAD/D2-IAD | IAD/D2-IAD/51 | IAD    |
| S15_3 |             | IAD/D2-IAD | IAD/D2-IAD/51 | IAD    |

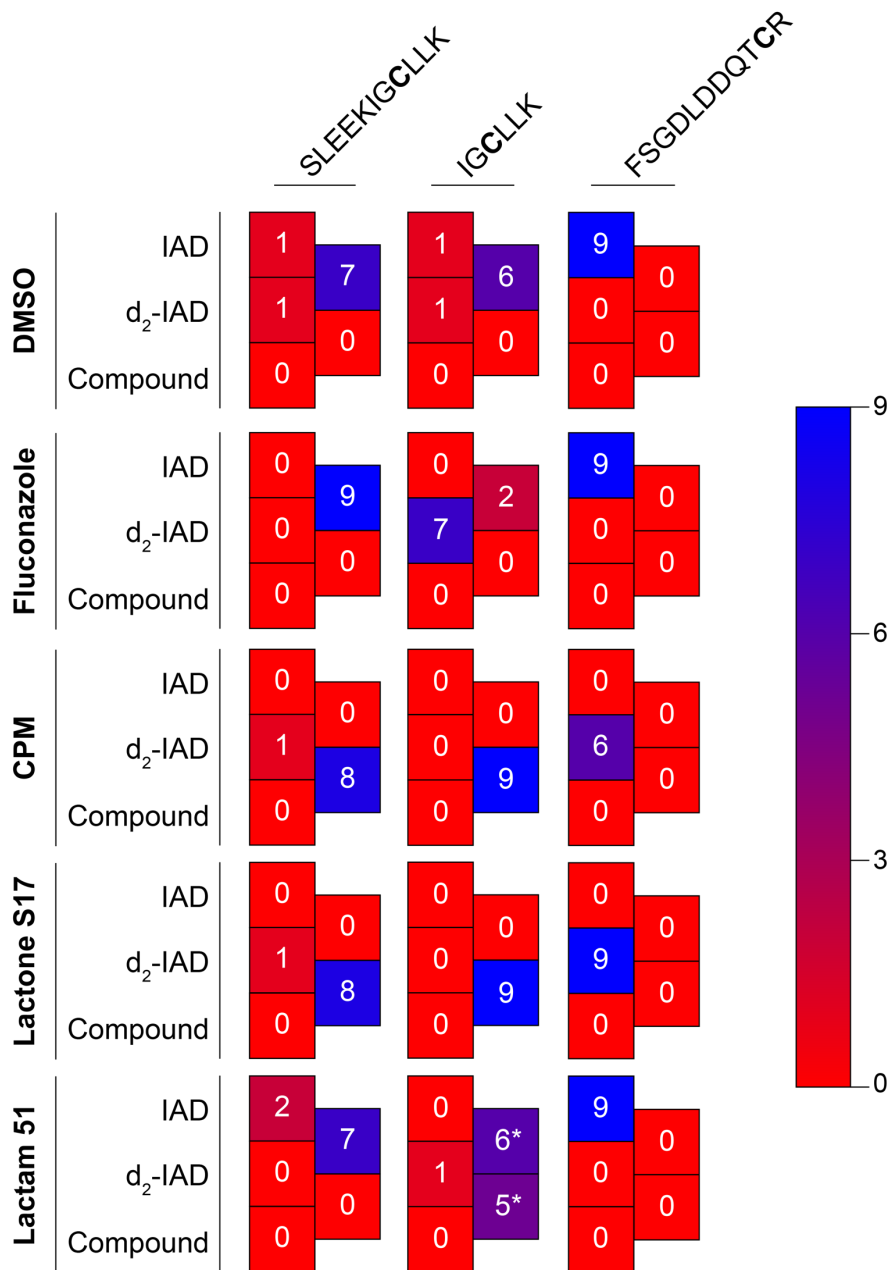

**Figure S34.** Heat map analysis of the observed adducts from La Antigen mass spectrometry MS/MS analysis (Table 12). Fluconazole is the negative control (non-thiol reactive) and CPM is the positive control (thiol-reactive). Asterisk indicates three samples overlap between these two categories (i.e., in three samples,  $\text{IGC}^{232}\text{LLK}$  is found adducted with IAD, d<sub>2</sub>-IAD, and compound). Boxes in the middle of two possible adducts indicates the number of samples in which

the peptide is found with both adducts. Samples included three biological replicates analyzed each in technical triplicate.

# <sup>1</sup>H NMR, <sup>13</sup>C NMR, and Peptide Mass Spectra

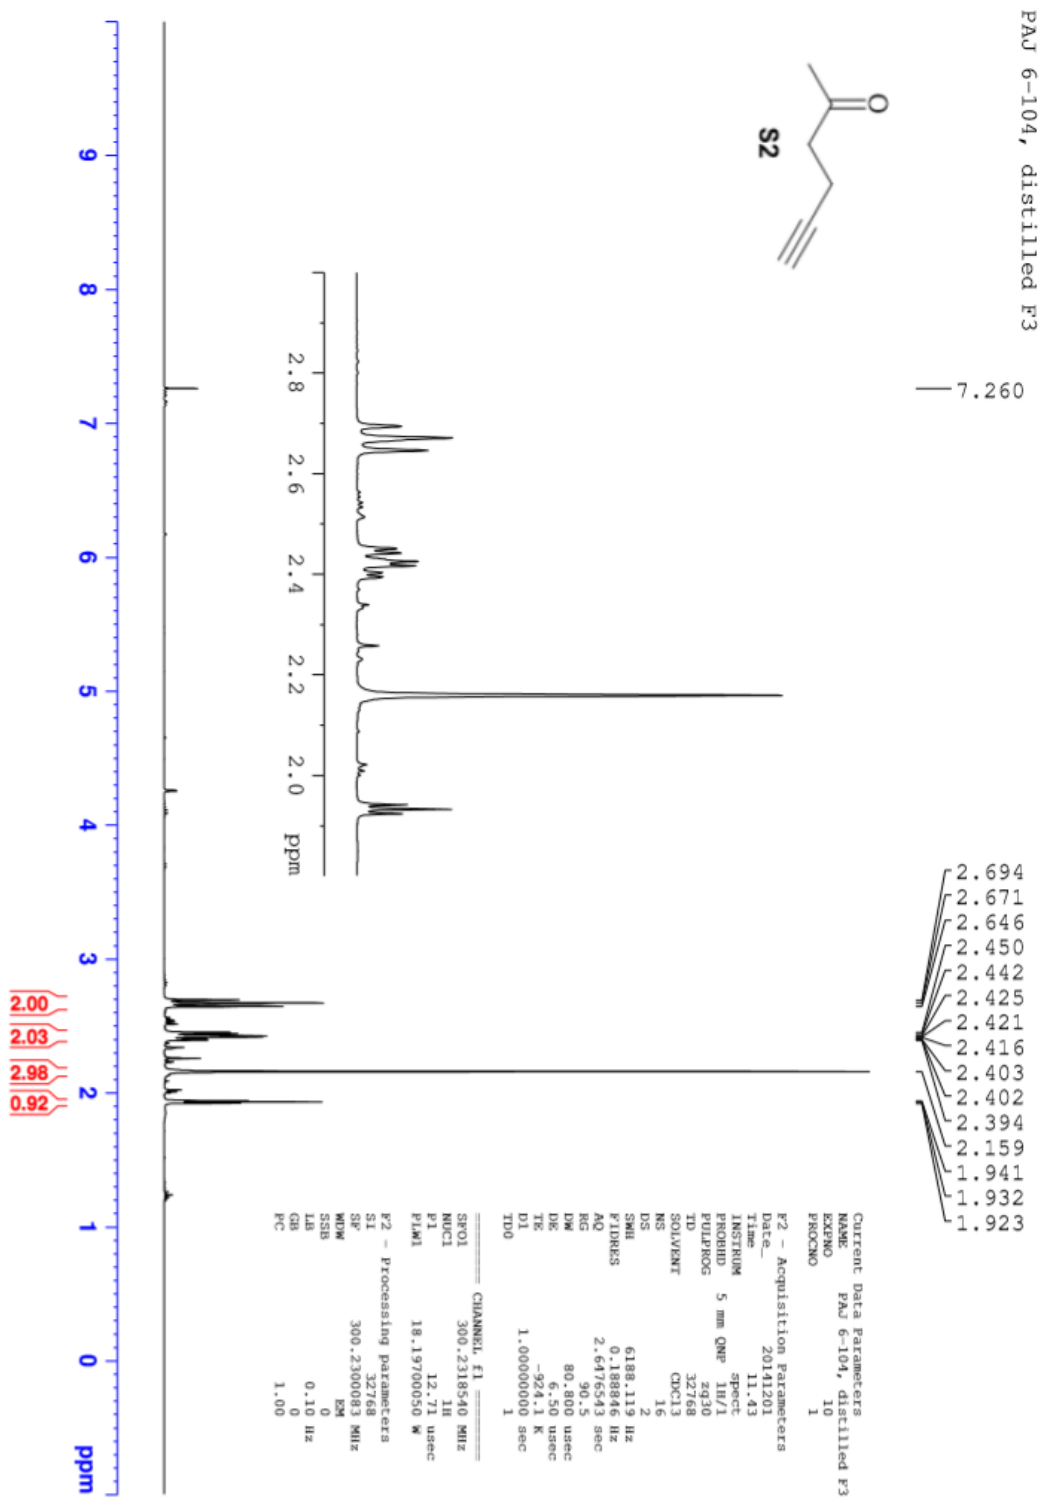

PAJ 6-106 dist. f3

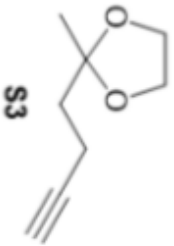

7.336  
7.260

5.973  
5.941  
5.935  
5.929  
5.921  
5.909  
5.907  
5.901  
5.889  
5.889  
5.887  
5.883  
5.893  
5.884  
5.868  
5.261  
5.252  
5.240  
5.232  
5.928  
5.923  
5.916  
5.907  
5.900  
5.891  
5.881

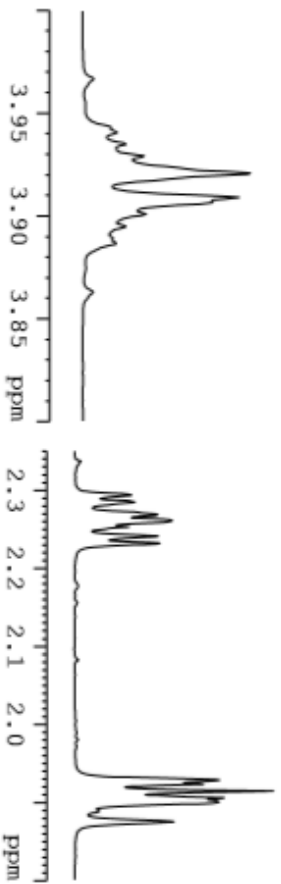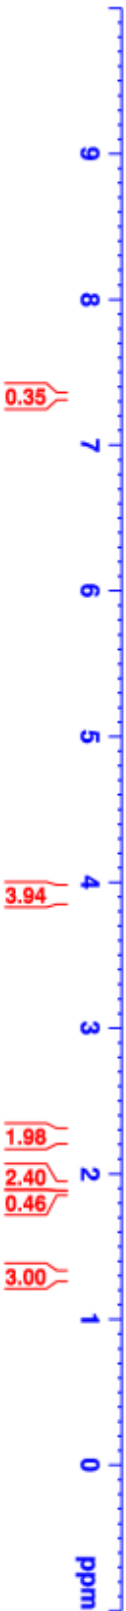

Current Data Parameters  
NAME PAJ 6-106 dist. f3  
EXPNO 10  
PROCNO 1

F2 - Acquisition Parameters  
Date\_ 20141202  
Time 17.26  
INSTRUM spect  
PROBHD 5 mm QNP 1H/1  
PULPROG zg30  
TD 32768  
SOLVENT CDCl3  
NS 16  
DS 2  
SWH 6188.119 Hz  
FIDRES 0.188846 Hz  
AQ 2.6476543 sec  
RG 50.8  
DW 80.800 usec  
DE 6.50 usec  
TE -927.5 K  
D1 1.00000000 sec  
TD0 1

CHANNEL f1  
SF01 300.2318540 MHz  
NUC1 1H  
PI 12.71 usec  
PLW1 18.1970050 W

F2 - Processing parameters  
SI 32768  
SF 300.2300086 MHz  
WDW EM  
SSB 0  
LB 0.10 Hz  
GB 0  
PC 1.00

PAJ, 6-66, simple distill

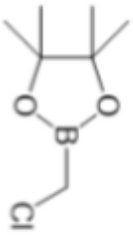

S5

7.260

2.943

1.278

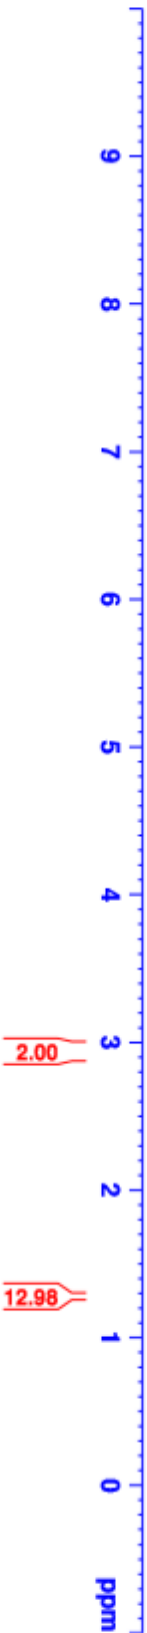

Current Data Parameters  
NAME Paj, 6-66, simple distill  
EXPNO 20  
PROCNO 1

F2 - Acquisition Parameters  
Date\_ 20141001  
Time 17.01  
INSTRUM spect  
PROBHD 5 mm QNP 1H/1  
PULPROG zg30  
TD 32768  
SOLVENT CDCl3  
NS 16  
DS 2  
SWH 5188.112 Hz  
FIDRES 0.180046 Hz  
AQ 2.6476543 sec  
RG 50.8  
DM 80.800 usec  
DE 6.90 usec  
TE -923.3 K  
D1 1.00000000 sec  
TD0 1

CHANNEL F1  
SFO1 300.2318540 MHz  
NUC1 1H  
P1 12.71 usec  
PL1 18.19700050 W

F2 - Processing parameters  
SI 32768  
SF 300.230083 MHz  
WDW EM  
SSB 0  
LB 0.10 Hz  
GB 0  
PC 1.00



PAJ 8-94, CNMR

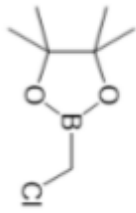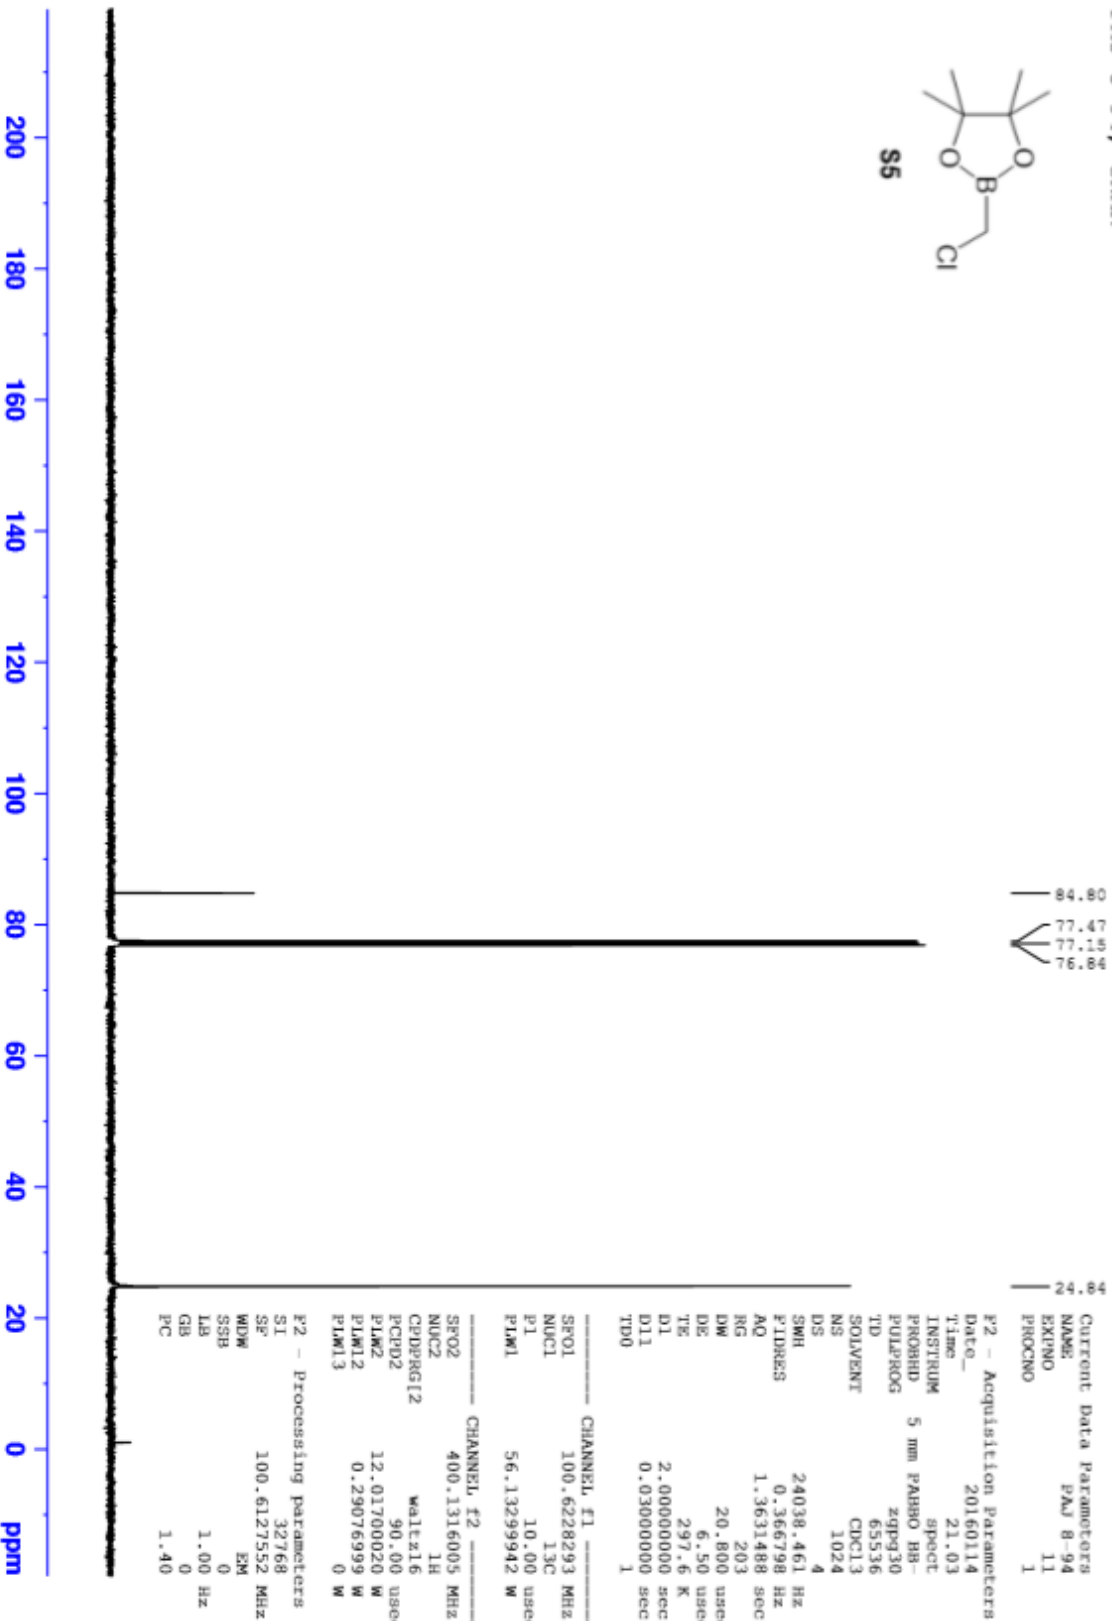

8.918  
8.917  
8.916  
8.915  
8.914

Current Data Parameters  
NAME Paj 8-94  
EXPNO 11  
PROCNO 1

F2 - Acquisition Parameters  
Date\_ 20160114  
Time 21.03  
INSTRUM spect  
PROBHD 5 mm PABBO B8-  
PULPROG zgpg30  
TD 65536  
SOLVENT CDCl3  
NS 1024  
DS 4  
SWH 24038.461 Hz  
FIDRES 0.366798 Hz  
AQ 1.3631488 sec  
RG 203  
DW 20.800 usec  
DE 6.50 usec  
TE 297.6 K  
D1 2.00000000 sec  
D11 0.03000000 sec  
TD0 1

CHANNEL F1  
SFO1 100.6228293 MHz  
NUC1 13C  
P1 10.00 usec  
PL1 56.13299942 W

CHANNEL F2  
SFO2 400.1316005 MHz  
NUC2 1H  
CPDPRG12 waltz16  
PCPD2 90.00 usec  
PLM2 12.01700020 W  
PLM12 0.29076999 W  
PLM13 0 W

F2 - Processing parameters  
SI 32768  
SF 100.6127552 MHz  
WDW EM  
SSB 0  
LB 1.00 Hz  
GB 0  
PC 1.40

PAJ 6-130

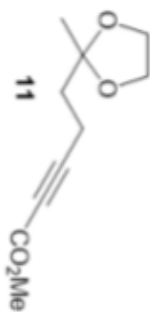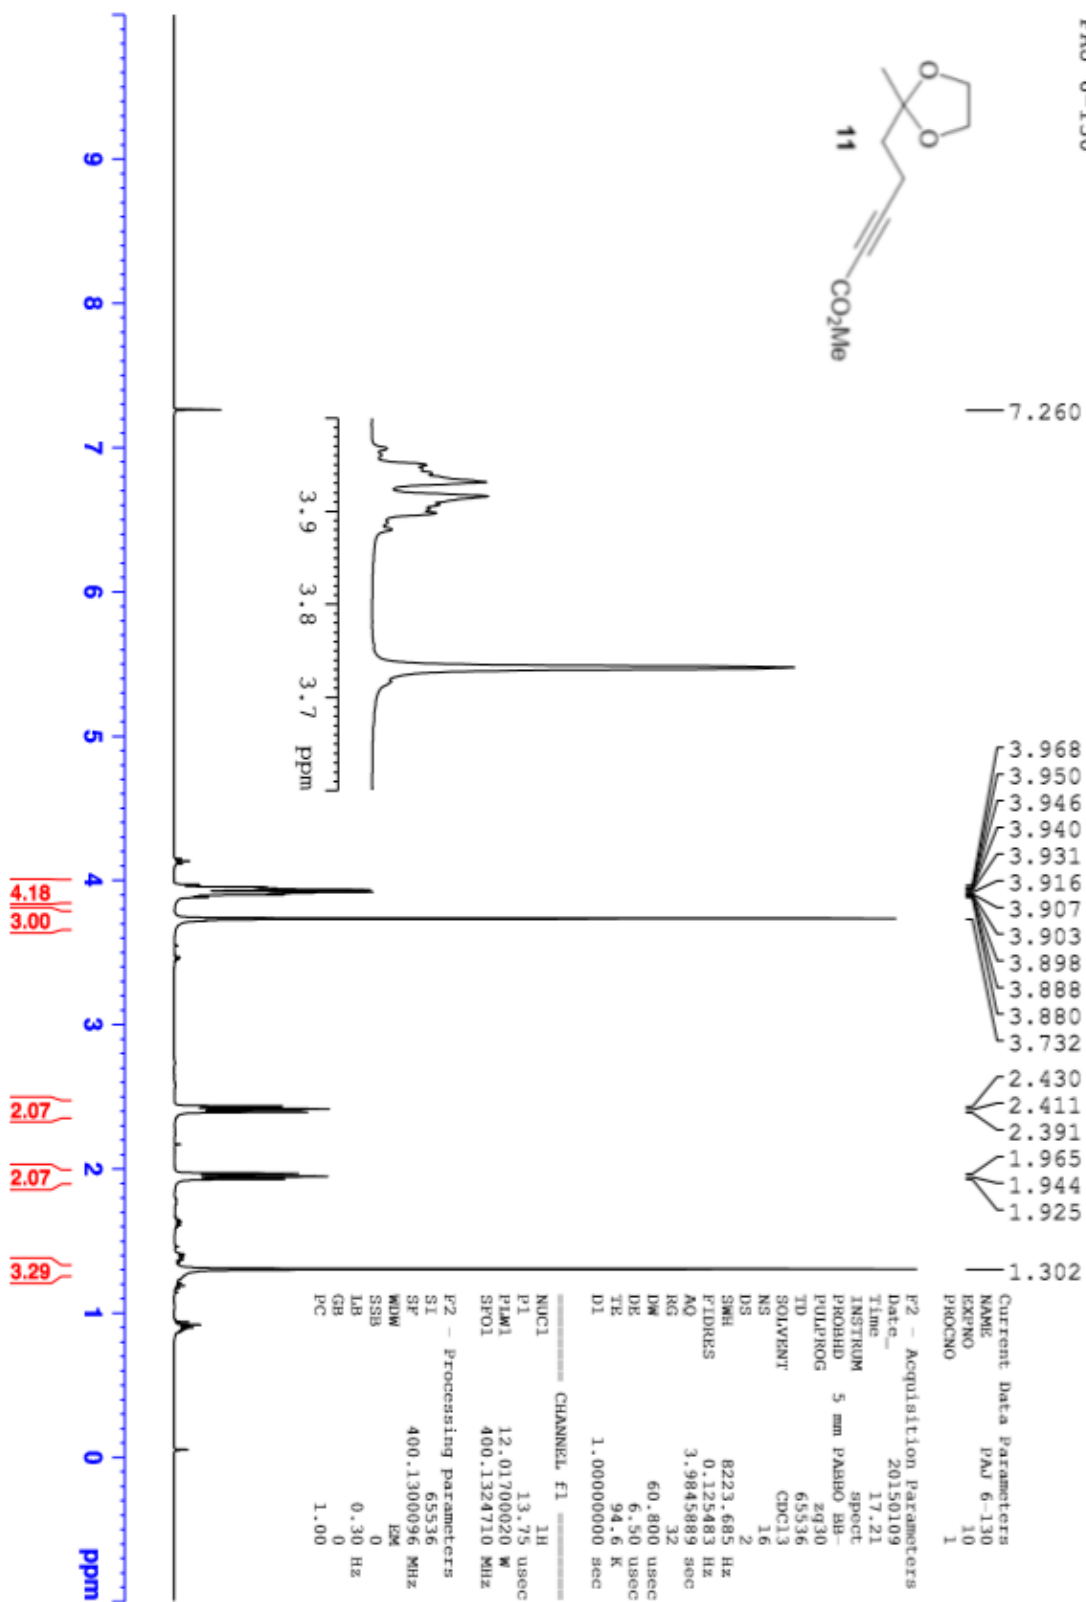

PAJ 6-74 12-24

- 7.261
- 6.748
- 6.729
- 6.711
- 5.963
- 5.945
- 5.926
- 3.944
- 3.936
- 3.928
- 3.924
- 3.916
- 3.907
- 3.699
- 3.478
- 3.460
- 2.614
- 2.595
- 2.574
- 2.555
- 2.276
- 2.257
- 2.247
- 2.236
- 2.216
- 1.851
- 1.817
- 1.792
- 1.772
- 1.752
- 1.732
- 1.665
- 1.325
- 1.222

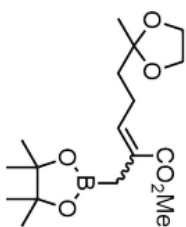

9

2:1 Z:E

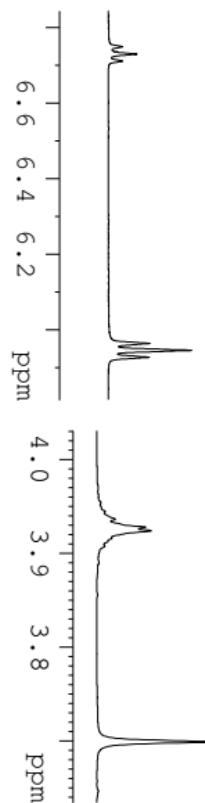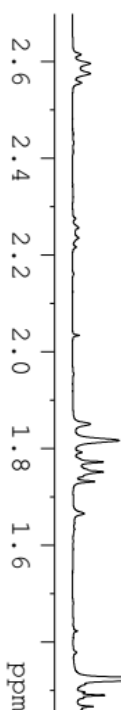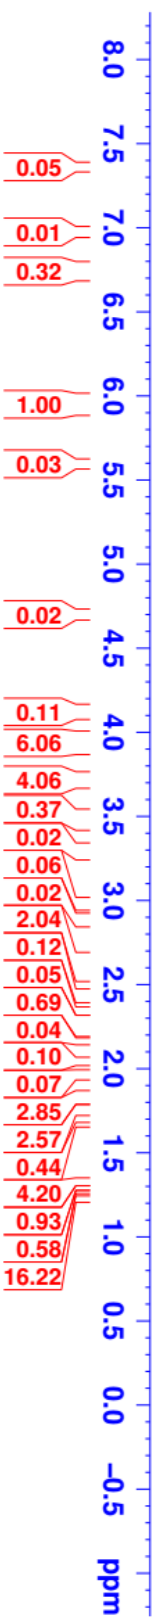

```

NAME          PAJ 6-74 12-24
EXPNO         10
PROCNO        1
Date_         20141015
Time          12.09
INSTRUM       spect
PROBHD        5 mm PABBO BB-
PULPROG       zg30
TD            65536
SOLVENT       CDCl3
NS            16
DS            2
SWH           8223.685 Hz
FIDRES        0.125483 Hz
AQ            3.9846387 sec
RG            57
DW            60.800 usec
DE            6.50 usec
TE            -3209.8 K
D1            1.00000000 sec

===== CHANNEL f1 =====
NUC1          1H
P1            13.75 usec
SI            65536
SF            400.1300090 MHz
WDW           EM
SSB           0
LB            0.30 Hz
GB            0
PC            1.00
  
```

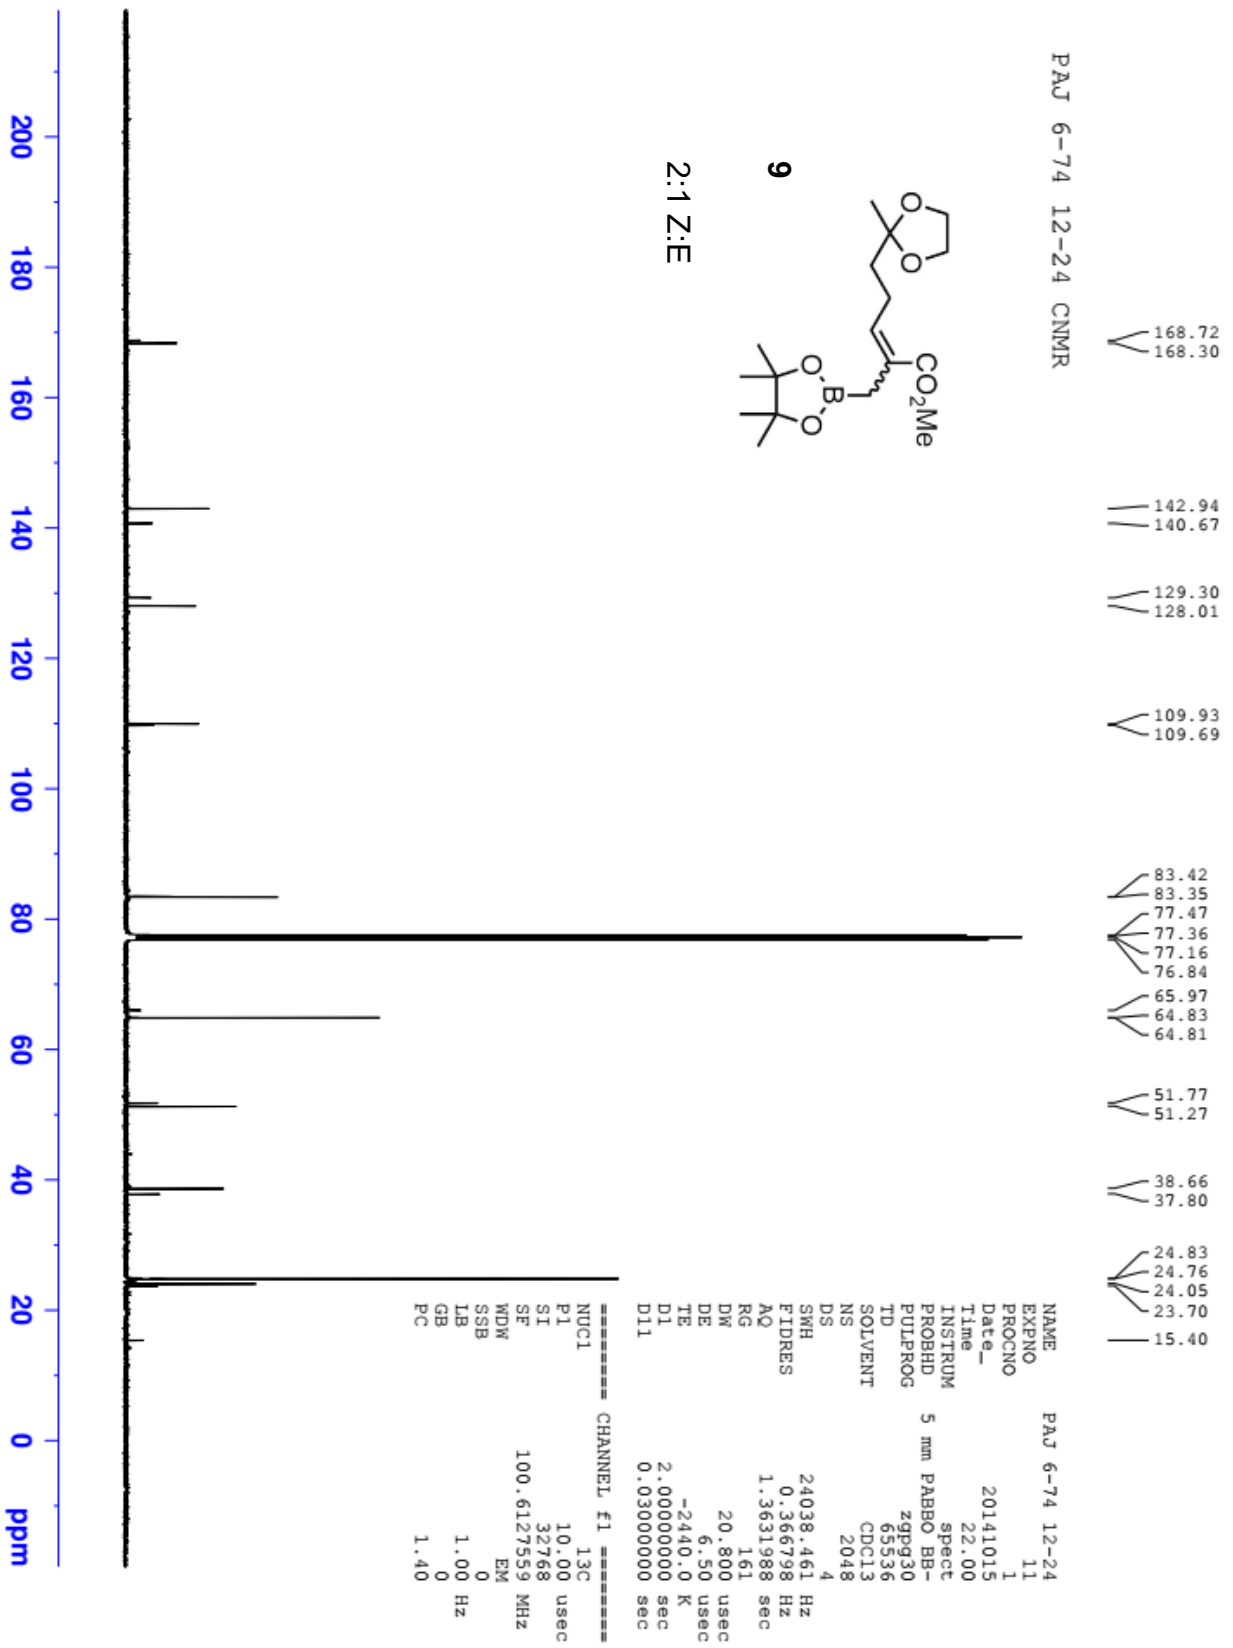

Paj 7-14

9.430  
7.627  
7.622  
7.619  
7.616  
7.607  
7.602  
7.598  
7.519  
7.516  
7.512  
7.503  
7.497  
7.492  
7.482  
7.478  
7.475  
7.428  
7.425  
7.412  
7.409  
7.405  
7.395  
7.391  
7.388  
7.260

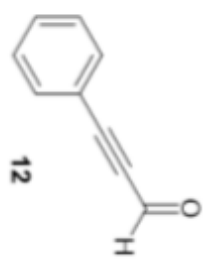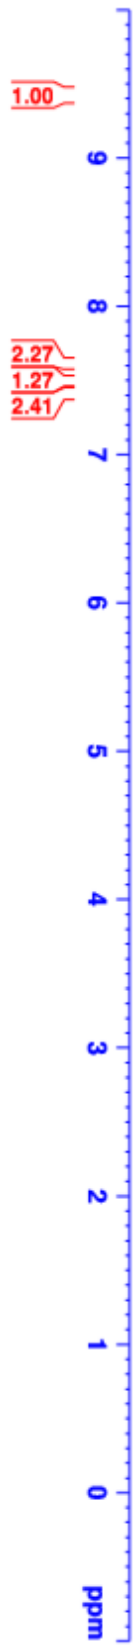

Current Data Parameters  
 NAME Paj 7-14  
 EXPNO 10  
 PROCNO 1

F2 - Acquisition Parameters  
 Date\_ 20150520  
 Time 11.54

INSTRUM spect  
 PROBHD 5 mm PABBO BB-  
 PULPROG zg30  
 TD 65536  
 SOLVENT CDCl3  
 NS 16  
 DS 2

SWH 8223.685 Hz  
 FIDRES 0.129483 Hz  
 AQ 3.9845889 sec  
 RG 128  
 DW 60.800 usec  
 DE 6.50 usec  
 TE 95.4 K  
 D1 1.00000000 sec

CHANNEL F1

NUC1 1H  
 P1 13.75 usec  
 PLM1 12.01700020 W  
 SFO1 400.1324710 MHz

F2 - Processing parameters  
 SI 65536  
 SF 400.1300102 MHz  
 WDW EM  
 SSB 0  
 LB 0.30 Hz  
 GB 0  
 PC 1.00

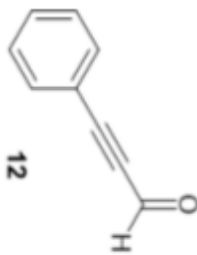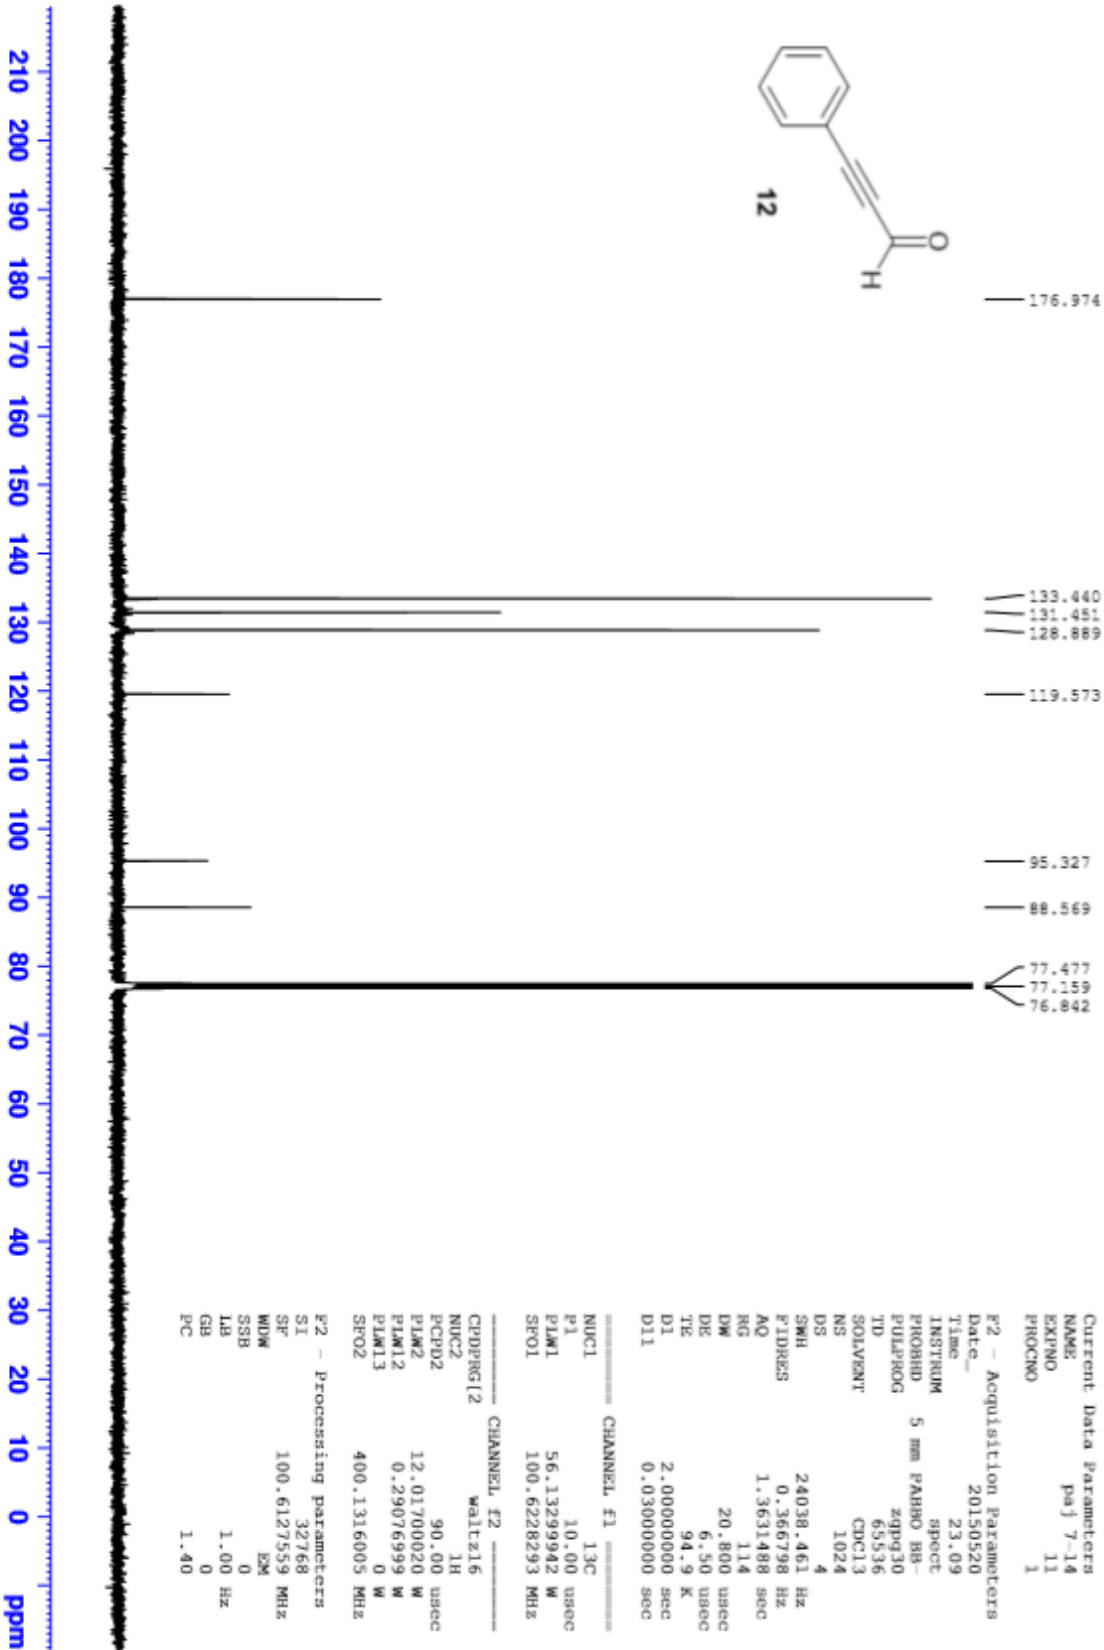

Current Data Parameters  
 NAME pag 7-14  
 EXPNO 11  
 PROCNO 1

F2 - Acquisition Parameters  
 Date\_ 20150520

Time 23.09  
 INSTRUM spect  
 PROBRD 5 mm PABBO BB-  
 PULPROG zgpg30  
 TD 65536  
 SOLVENT CDCl3  
 NS 1024  
 DS 4  
 SWH 24038.461 Hz  
 FIDRES 0.366798 Hz  
 AQ 1.3631488 sec  
 RG 114  
 DW 20.800 usec  
 DE 6.50 usec  
 TE 94.9 K  
 D1 2.00000000 sec  
 D11 0.03000000 sec

CHANNEL F1  
 NUC1 13C  
 P1 10.00 usec  
 PLM1 56.1329942 W  
 SFO1 100.6228293 MHz

CHANNEL F2  
 CPDPRG2 waltz16  
 NUC2 1H  
 PCPD2 90.00 usec  
 PLM2 12.01700020 W  
 PLM12 0.29076999 W  
 PLM13 0 W  
 SFO2 400.1316005 MHz

F2 - Processing parameters  
 SI 32768  
 SF 100.6127559 MHz  
 WDW EM  
 SSB 0  
 LB 1.00 Hz  
 GB 0  
 PC 1.40

PAU 7-2<sub>sp</sub> plug

9.20  
7.260

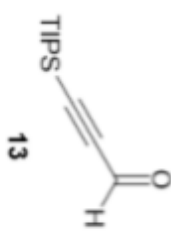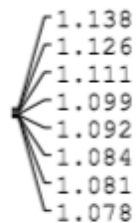

Current Data Parameters  
 NAME PAU 7-2, plug  
 EXPNO 10  
 PROCNO 1

F2 - Acquisition Parameters  
 Date\_ 20150310  
 Time 9.38

INSTRUM spect  
 PROBHD 5 mm PABBO BB-  
 PULPROG zg30

TD 65536  
 SOLVENT CDCl3  
 NS 16  
 DS 2

SWH 8223.685 Hz  
 FIDRES 0.125483 Hz  
 AQ 3.9845889 sec

RG 57  
 DW 60.800 usec  
 DE 6.50 usec  
 TE 95.7 K  
 D1 1.00000000 sec

----- CHANNEL F1 -----  
 NUCL 1H  
 P1 13.75 usec  
 PLWI 12.01700020 W  
 SFO1 400.1324710 MHz

F2 - Processing parameters  
 SI 65536  
 SF 400.1300108 MHz  
 WDW EM  
 SSB 0  
 LB 0.30 Hz  
 GB 0  
 PC 1.00

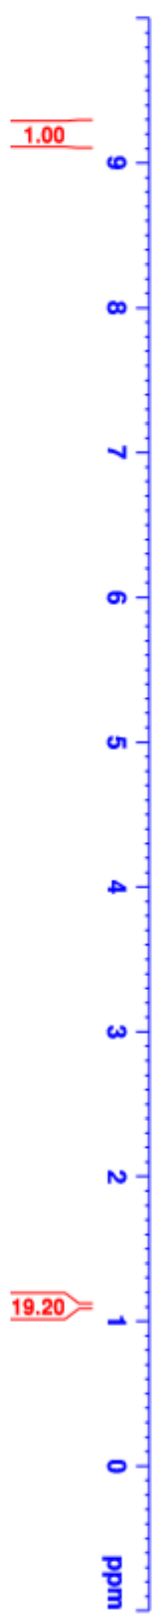

PAJ 7-2 CNMR

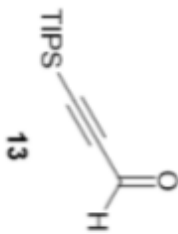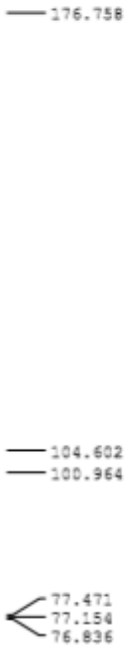

Current Data Parameters  
 NAME PAJ 7-2  
 EXPNO 11  
 PROCNO 1

F2 - Acquisition Parameters  
 Date\_ 20150520  
 Time 22.05

INSTRUM spect  
 PROHD 5 mm PABBO BB-  
 PULPROG zgpg30  
 TD 65536  
 SOLVENT CDCl3  
 NS 1024  
 DS 4  
 SWH 24038.461 Hz  
 FIDRES 0.366798 Hz  
 AQ 1.3631488 sec  
 RG 114  
 DW 20.800 usec  
 DE 6.50 usec  
 TE 94.8 K  
 D1 2.00000000 sec  
 D11 0.03000000 sec

CHANNEL F1  
 NUC1 13C  
 P1 10.00 usec  
 PLW1 56.1329942 W  
 SFO1 100.6228293 MHz

CHANNEL F2  
 CPDPRG12 waltz16  
 NUC2 1H  
 PCPD2 90.00 usec  
 PLW2 12.01700020 W  
 PLW12 0.29076999 W  
 PLW13 0 W  
 SFO2 400.1316005 MHz

F2 - Processing parameters  
 SI 32768  
 SF 100.6127551 MHz  
 WDW EM  
 SSB 0  
 LB 1.00 Hz  
 GB 0  
 PC 1.40

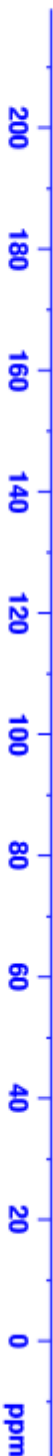



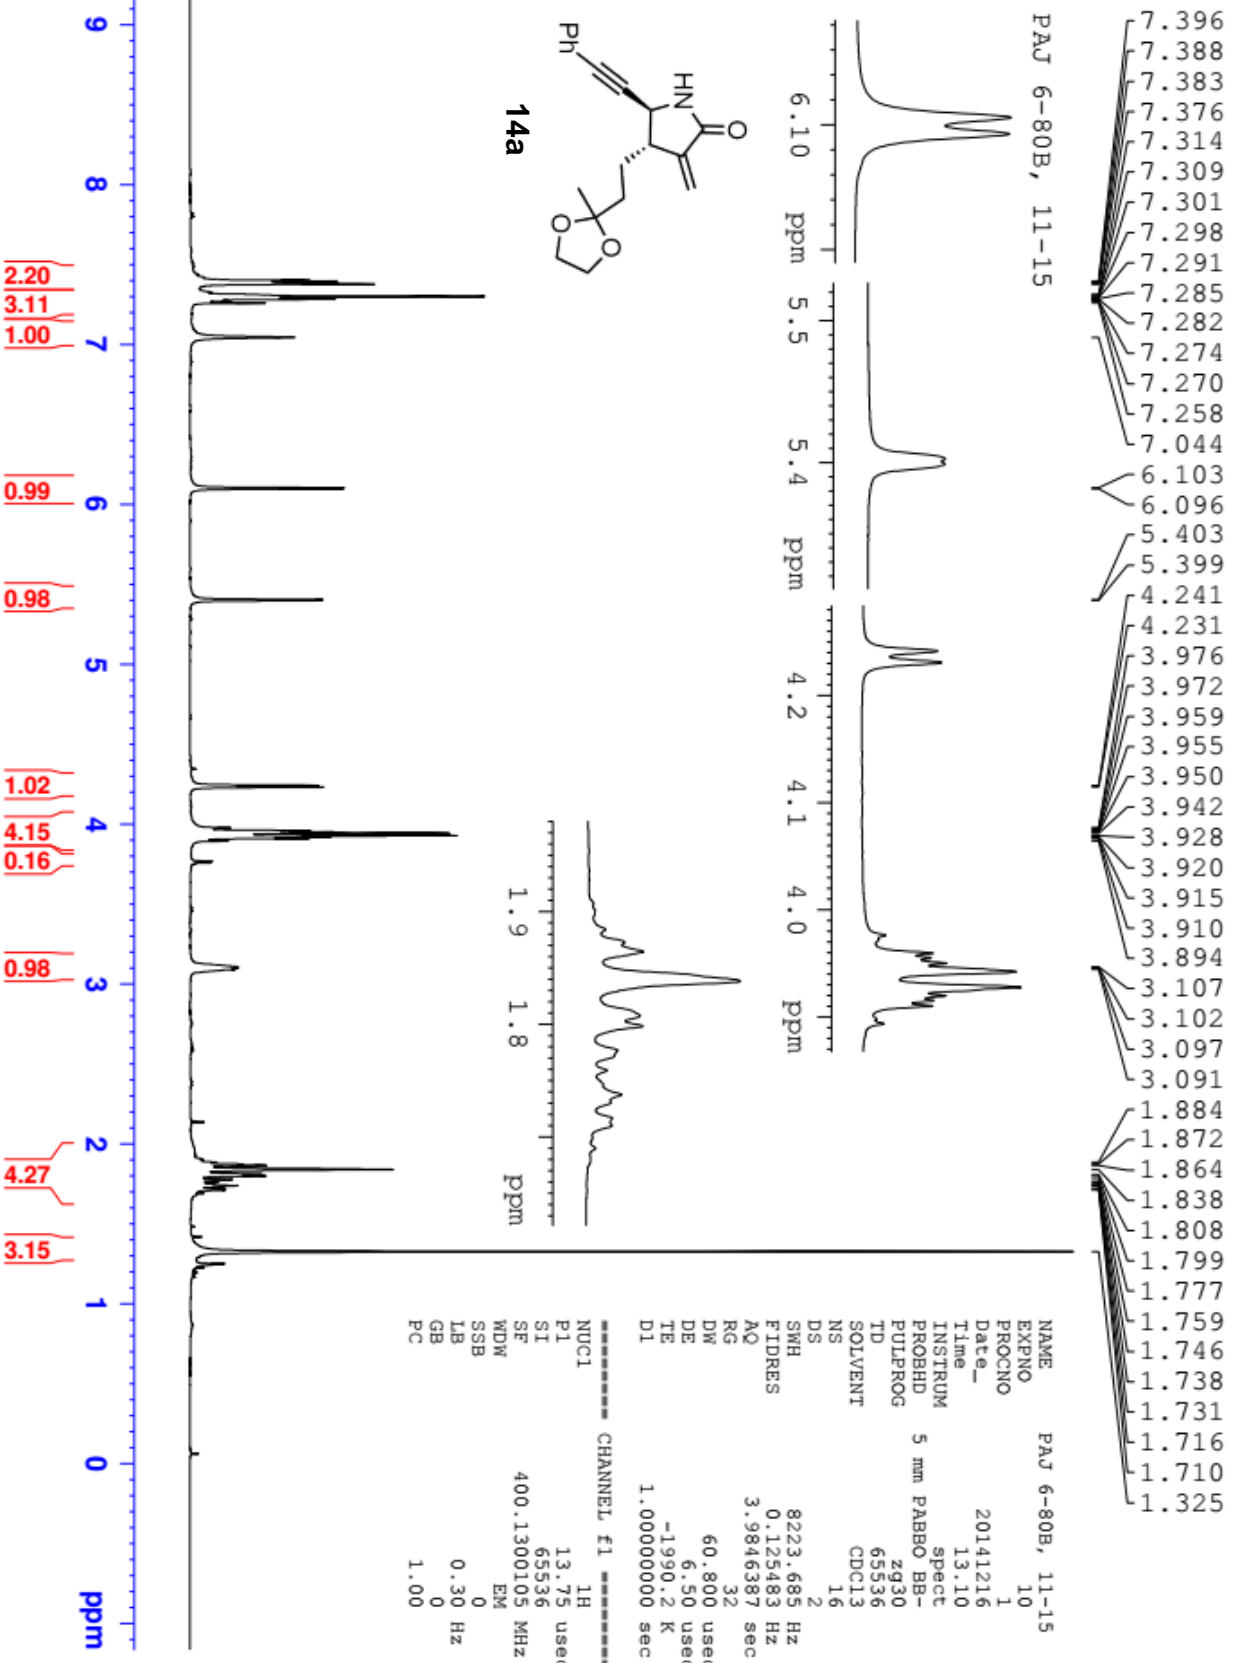

PAJ 6-80B, 11-15

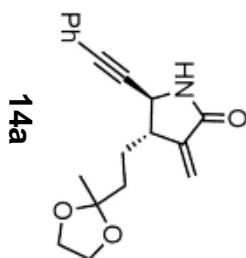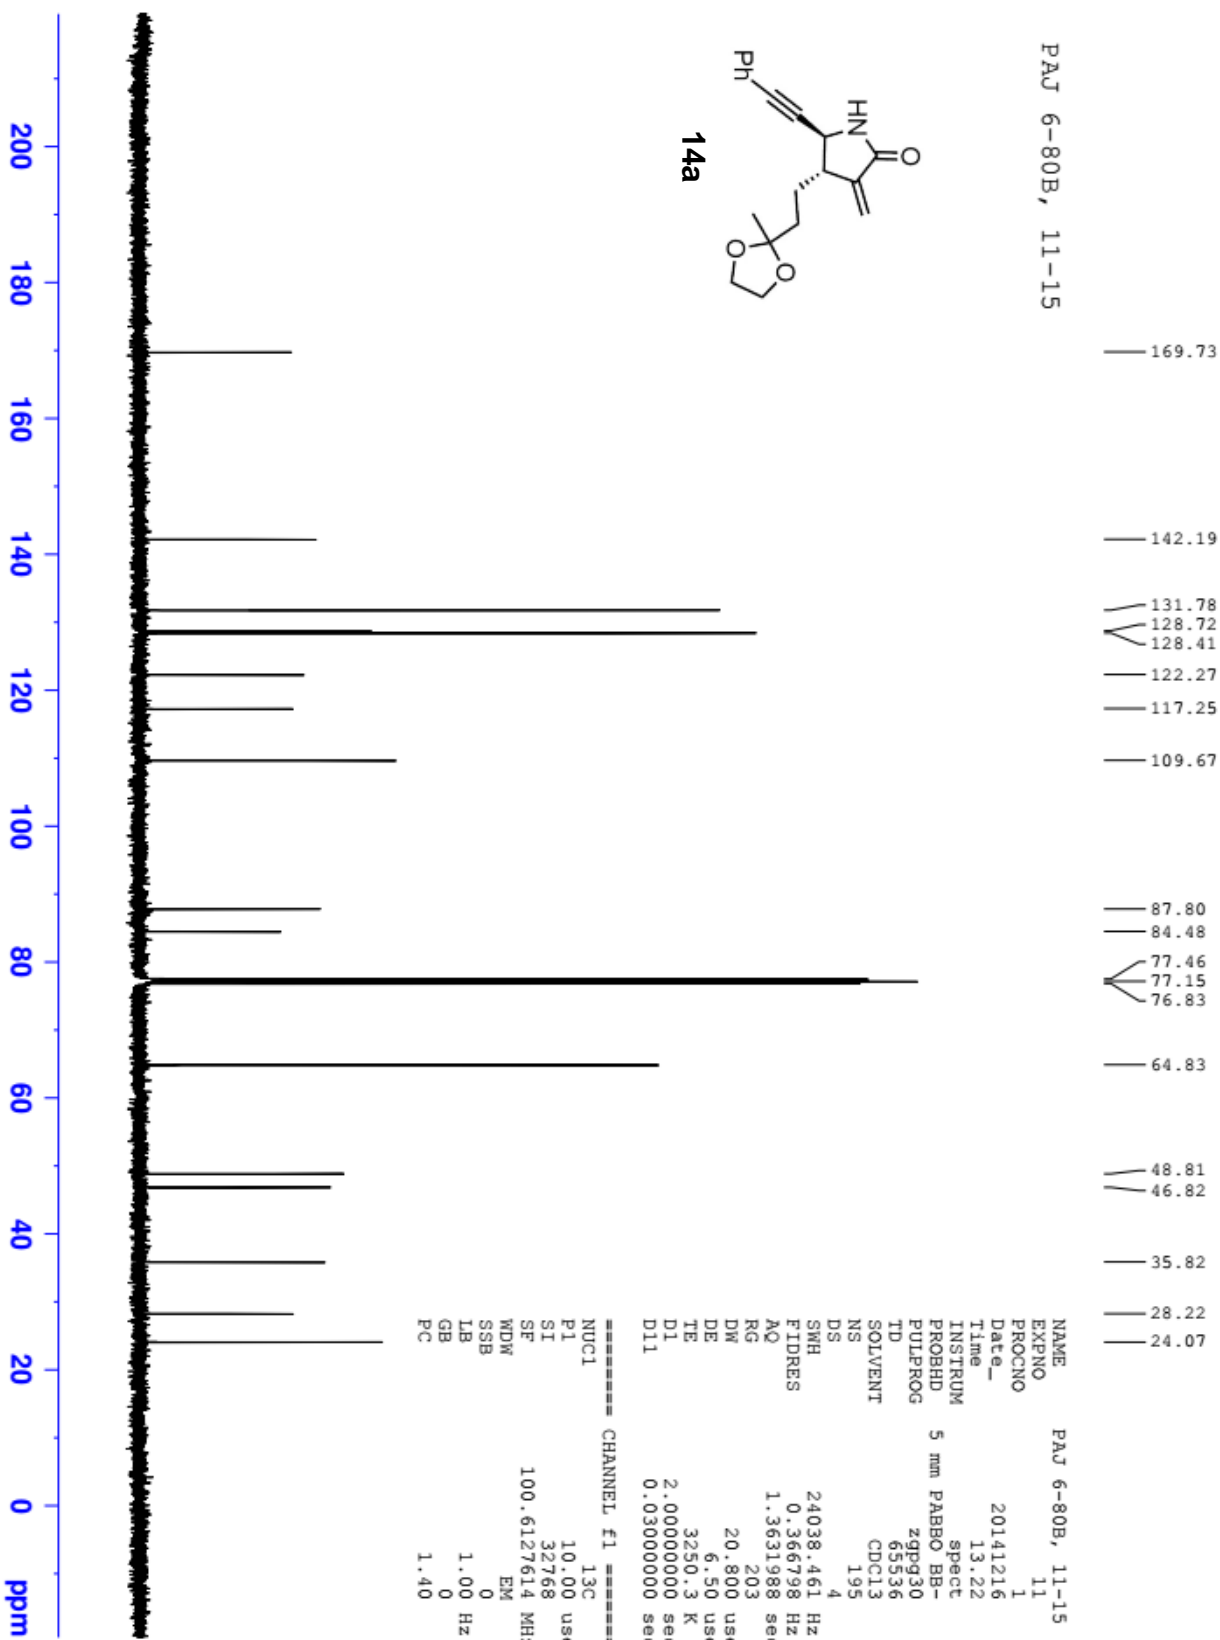

PAJ 6-80B, 23-26

- 7.407
- 7.403
- 7.397
- 7.389
- 7.384
- 7.312
- 7.301
- 7.283
- 7.251
- 6.312
- 6.125
- 6.115
- 6.103
- 6.096
- 5.413
- 5.399
- 5.394
- 4.696
- 4.681
- 4.661
- 3.934
- 3.926
- 3.917
- 3.911
- 3.898
- 3.888
- 3.871
- 3.122
- 3.115
- 3.096
- 3.089
- 3.080
- 2.154
- 2.112
- 2.095
- 1.960
- 1.941
- 1.933
- 1.923
- 1.911
- 1.896
- 1.873
- 1.845
- 1.763
- 1.751
- 1.744
- 1.659
- 1.256
- 1.240

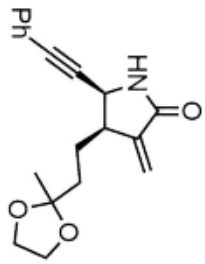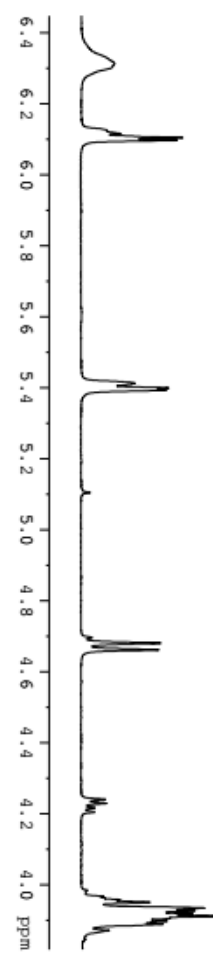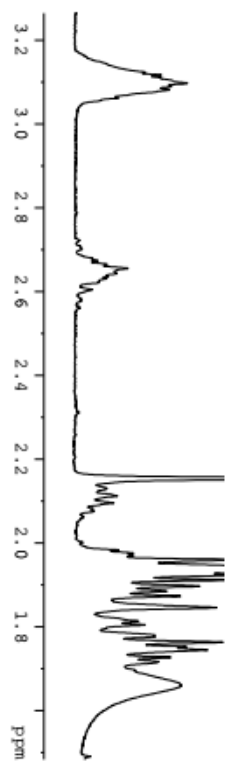

```

NAME          PAJ 6-80B, 23-26
EXPNO         10
PROCNO        1
Date_         20141028
Time_         17.16
INSTRUM       spect
PROBHD        5 mm PABBO BB-
PULPROG       zg30
TD            65536
SOLVENT       CDCl3
NS            16
DS            2
SWH           8223.685 Hz
FIDRES        0.125483 Hz
AQ            3.9846387 sec
RG            101
DW            60.800 usec
DE            6.50 usec
TE            -1.4 K
D1            1.00000000 sec

----- CHANNEL f1 -----
NUC1          1H
P1            13.75 usec
SI            65536
SF            400.1300129 MHz
WDW           EM
SSB           0
LB            0.30 Hz
GB            0
PC            1.00
  
```

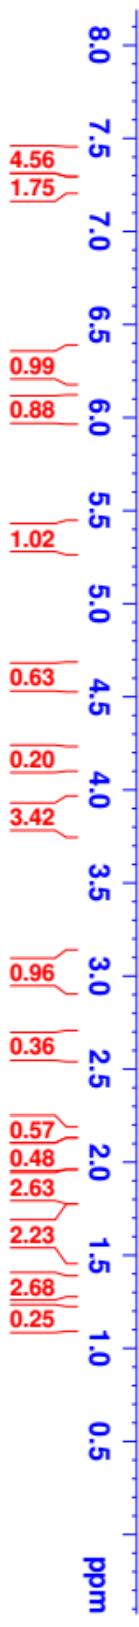

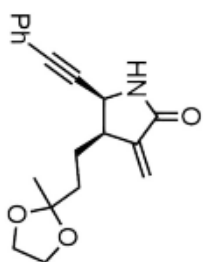

14b

PAJ 6-80B, 23-26 CNMR

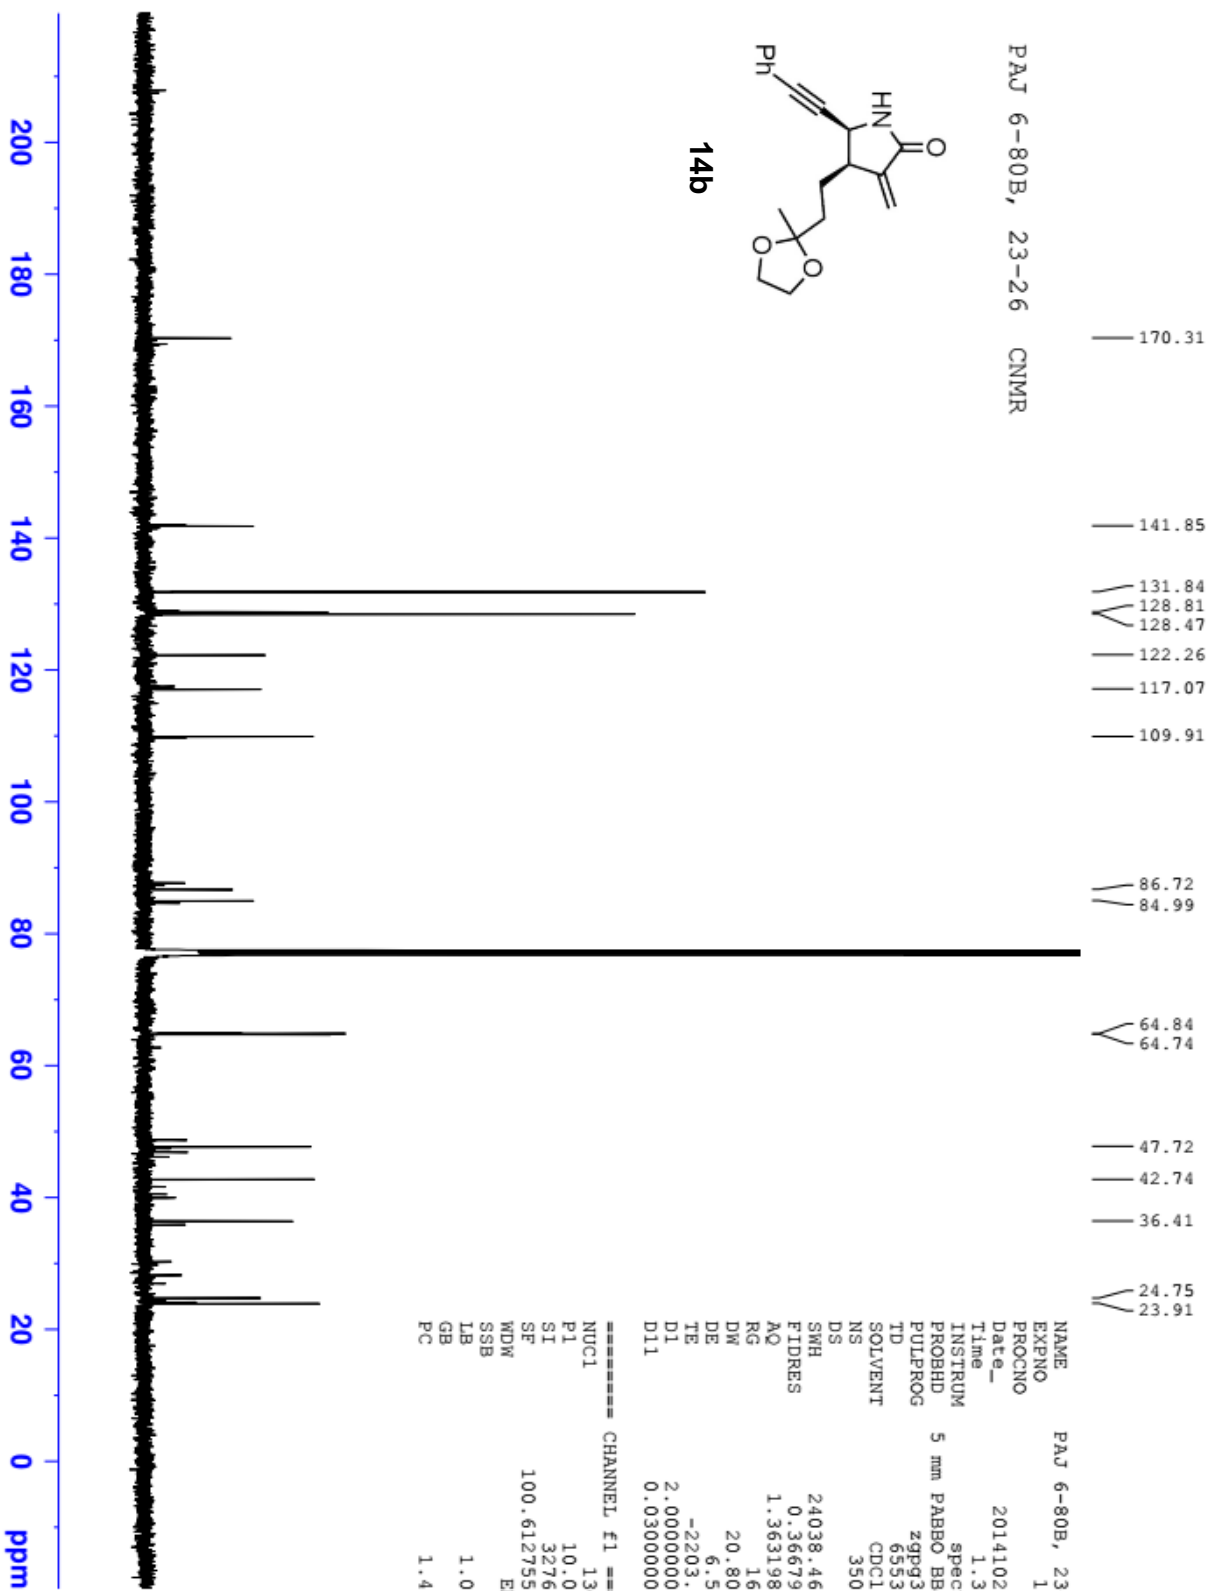

- 170.31
- 141.85
- 131.84
- 128.81
- 128.47
- 122.26
- 117.07
- 109.91
- 86.72
- 84.99
- 64.84
- 64.74
- 47.72
- 42.74
- 36.41
- 24.75
- 23.91

```

NAME          PAJ 6-80B, 23-26
EXPNO         1
PROCNO        1
Date_         20141029
Time          1.30
INSTRUM       spect
PROBHD        5 mm PABBO BB-
PULPROG       zgpg30
TD            65536
SOLVENT       CDCl3
NS            3500
DS            4
SMH           24038.461 Hz
FIDRES        0.366798 Hz
AQ            1.3631988 sec
RG            161
DE            20.800 usec
TE            -2203.4 K
D1            2.00000000 sec
D11           0.03000000 sec

===== CHANNEL f1 =====
NUC1          13C
P1            10.00 usec
SI            32768
SF            100.6127557 MHz
WDW           EM
SSB           0
LB            1.00 Hz
GB            0
PC            1.40
  
```

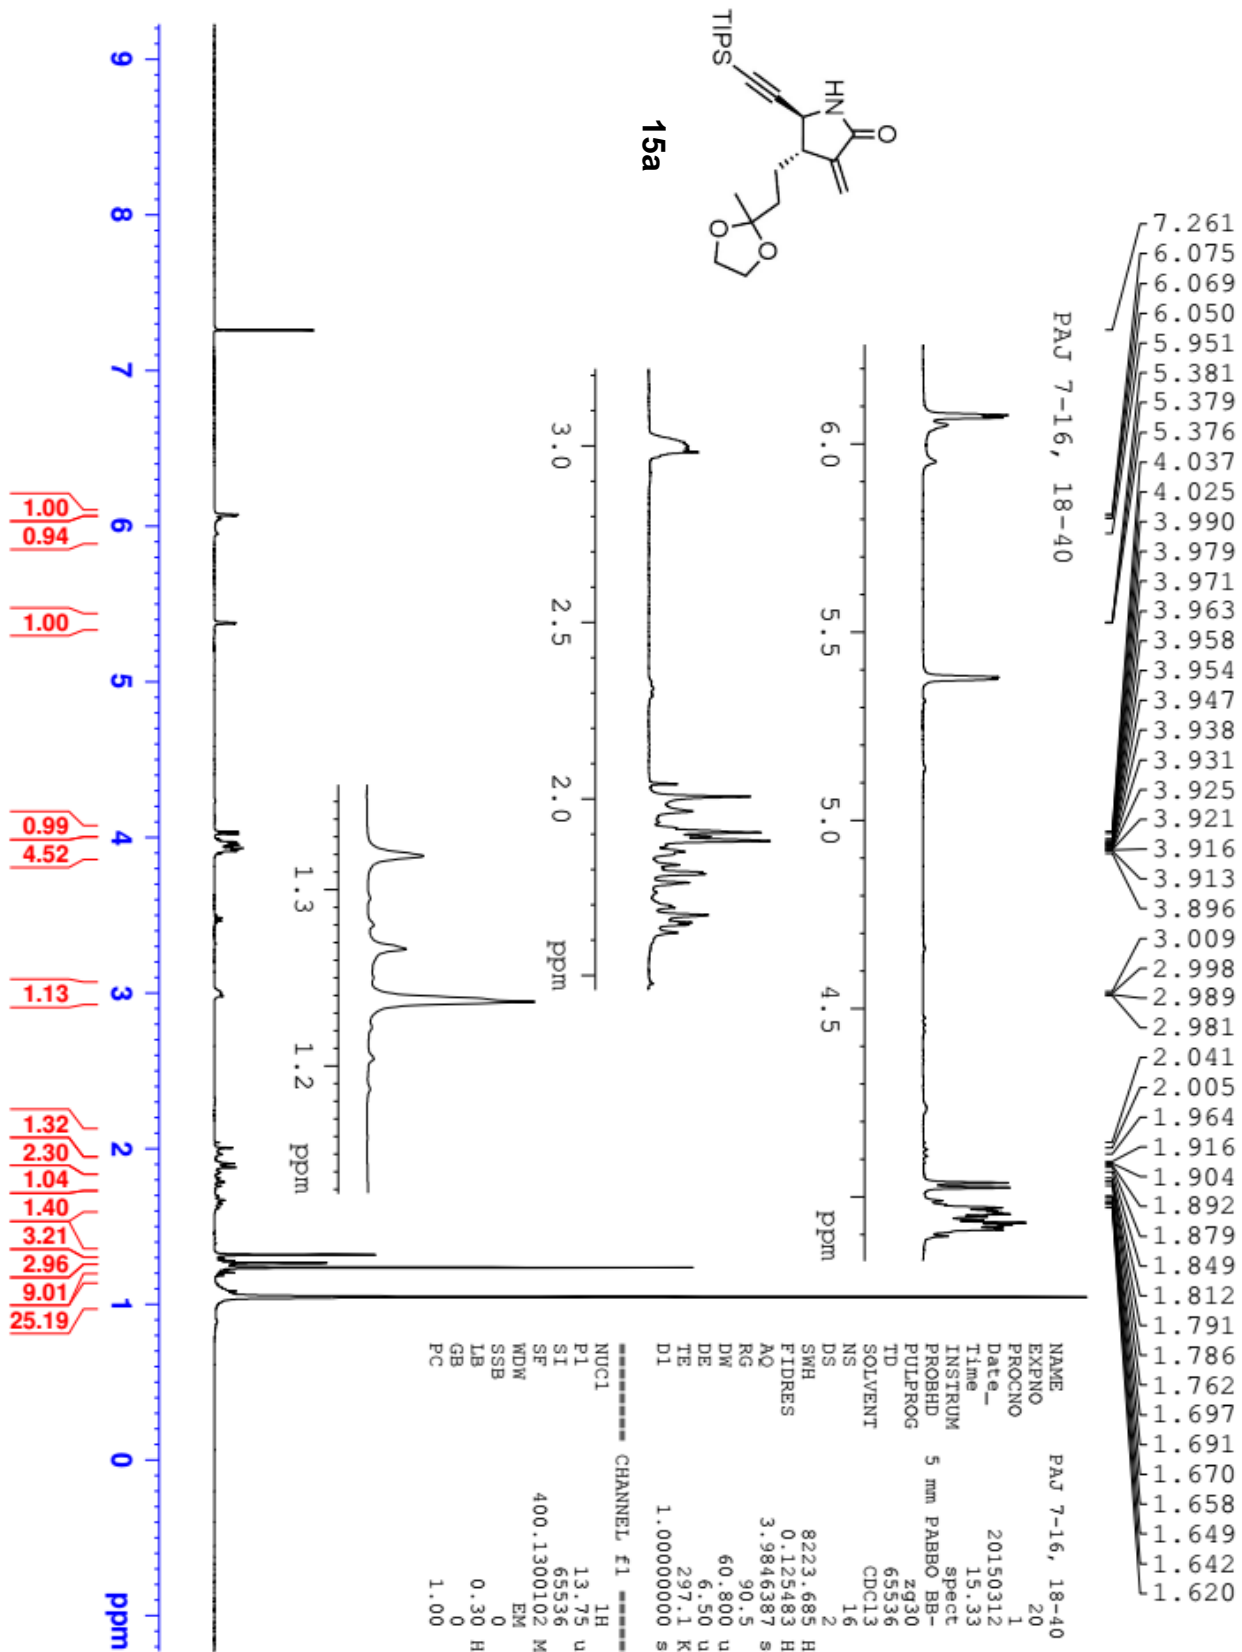

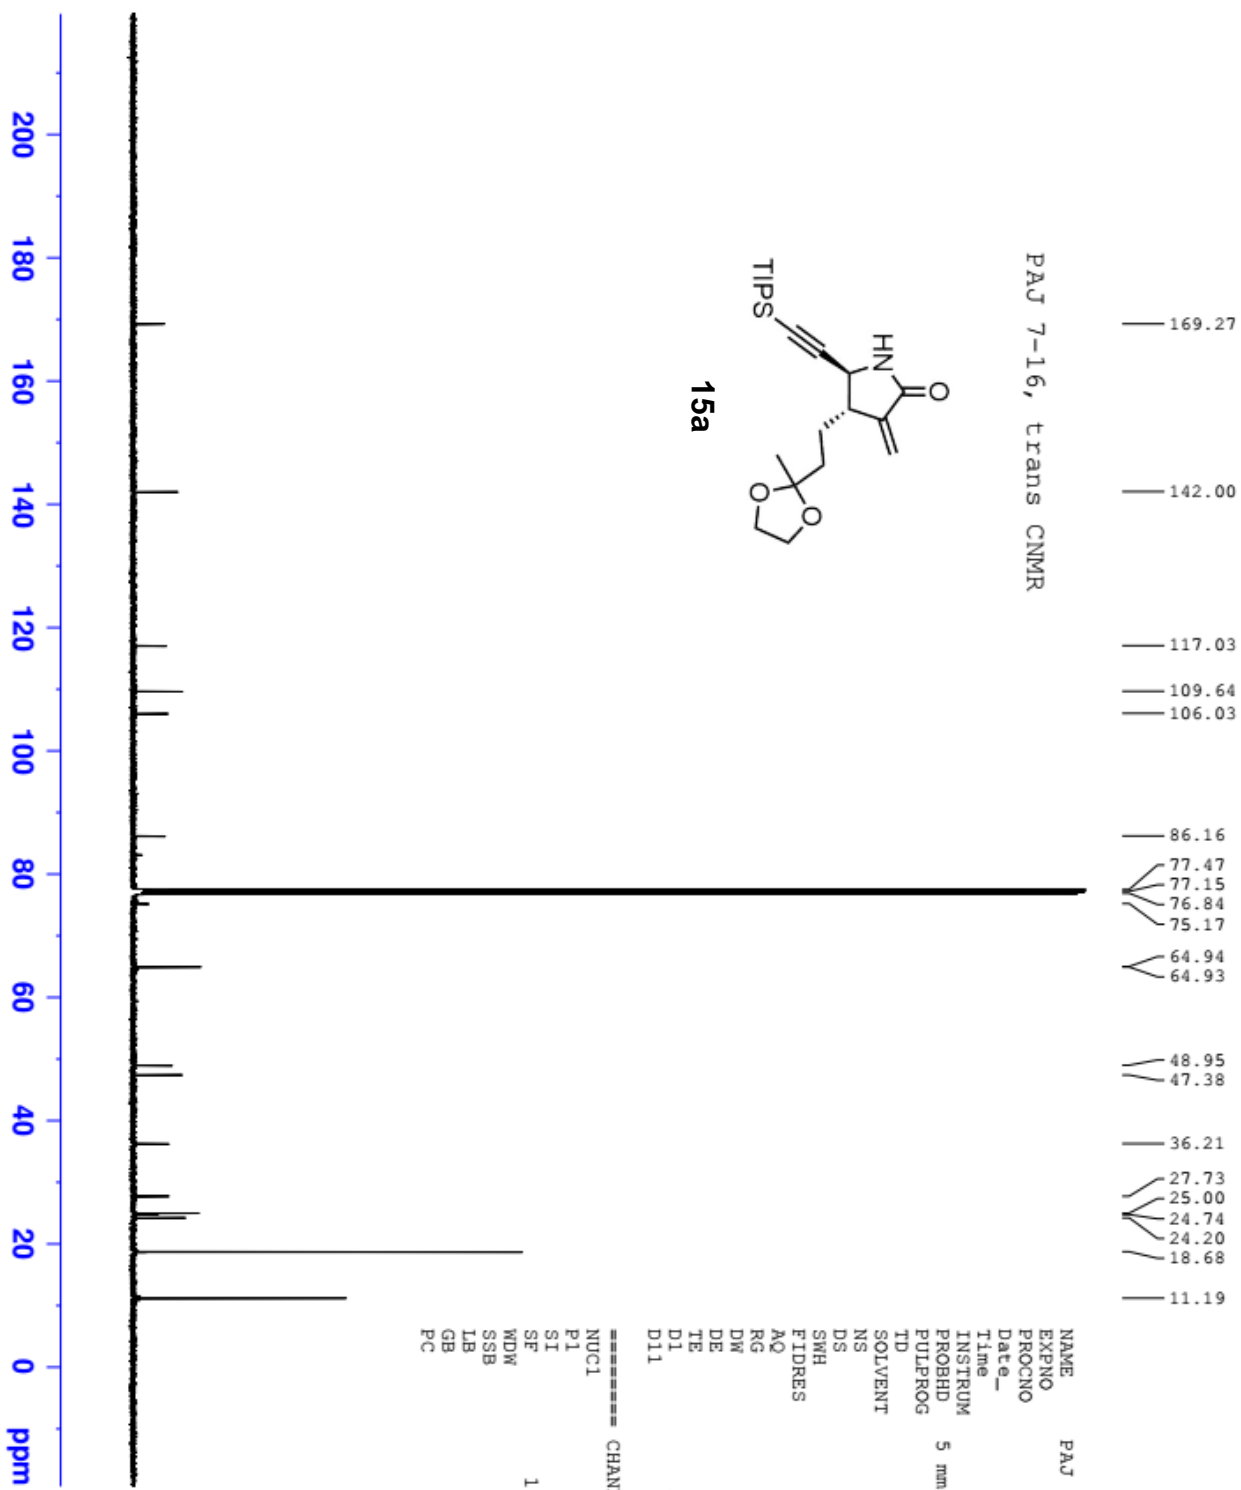

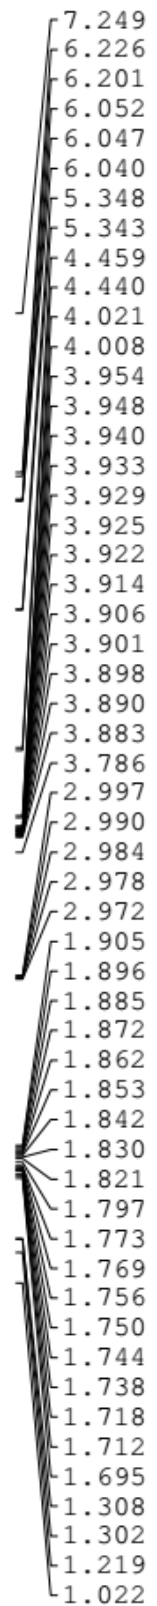

PAJ 7-16, 59-65

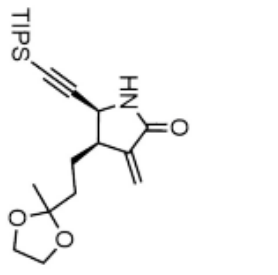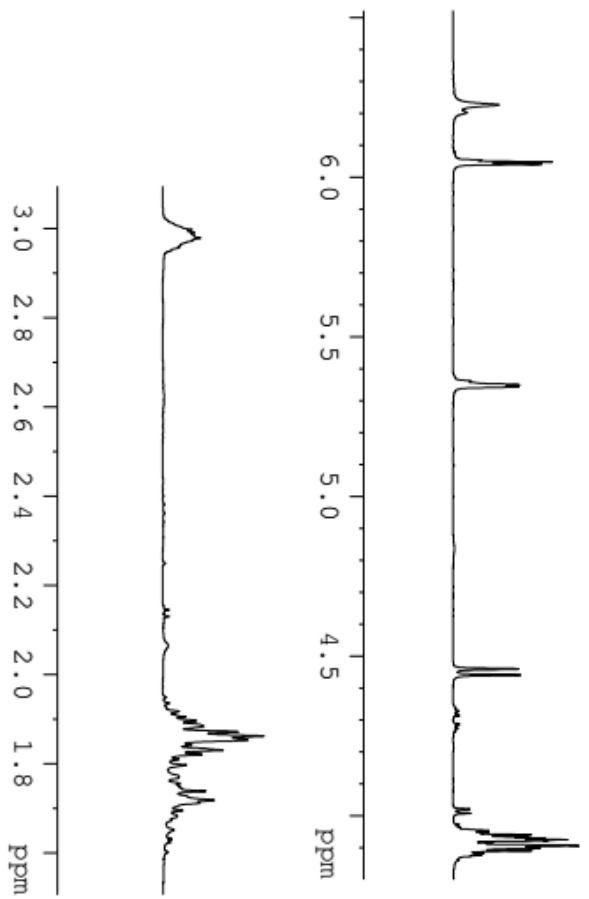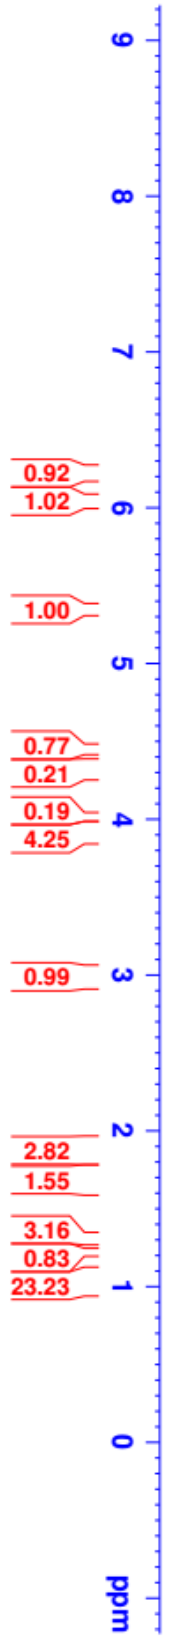

```

NAME          PAJ 7-16, 59-65
EXPNO         10
PROCNO        1
Date_         20150312
Time          15.28
INSTRUM       spect
PROBHD        5 mm PABBO BB-
PULPROG       zg30
TD            65536
SOLVENT       CDCl3
NS            16
DS            2
SWH           8223.685 Hz
FIDRES        0.125483 Hz
AQ            3.9846387 sec
RG            50.8
DE            60.800 usec
TE            297.1 K
D1            1.00000000 sec

----- CHANNEL f1 -----
NUC1          1H
P1            13.75 usec
SI            65536
SF            400.1300149 MHz
WDW           EM
SSB           0
LB            0.30 Hz
GB            0
PC            1.00
  
```

PAJ 7-16, 59-65 CNMR

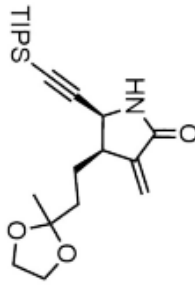

15b

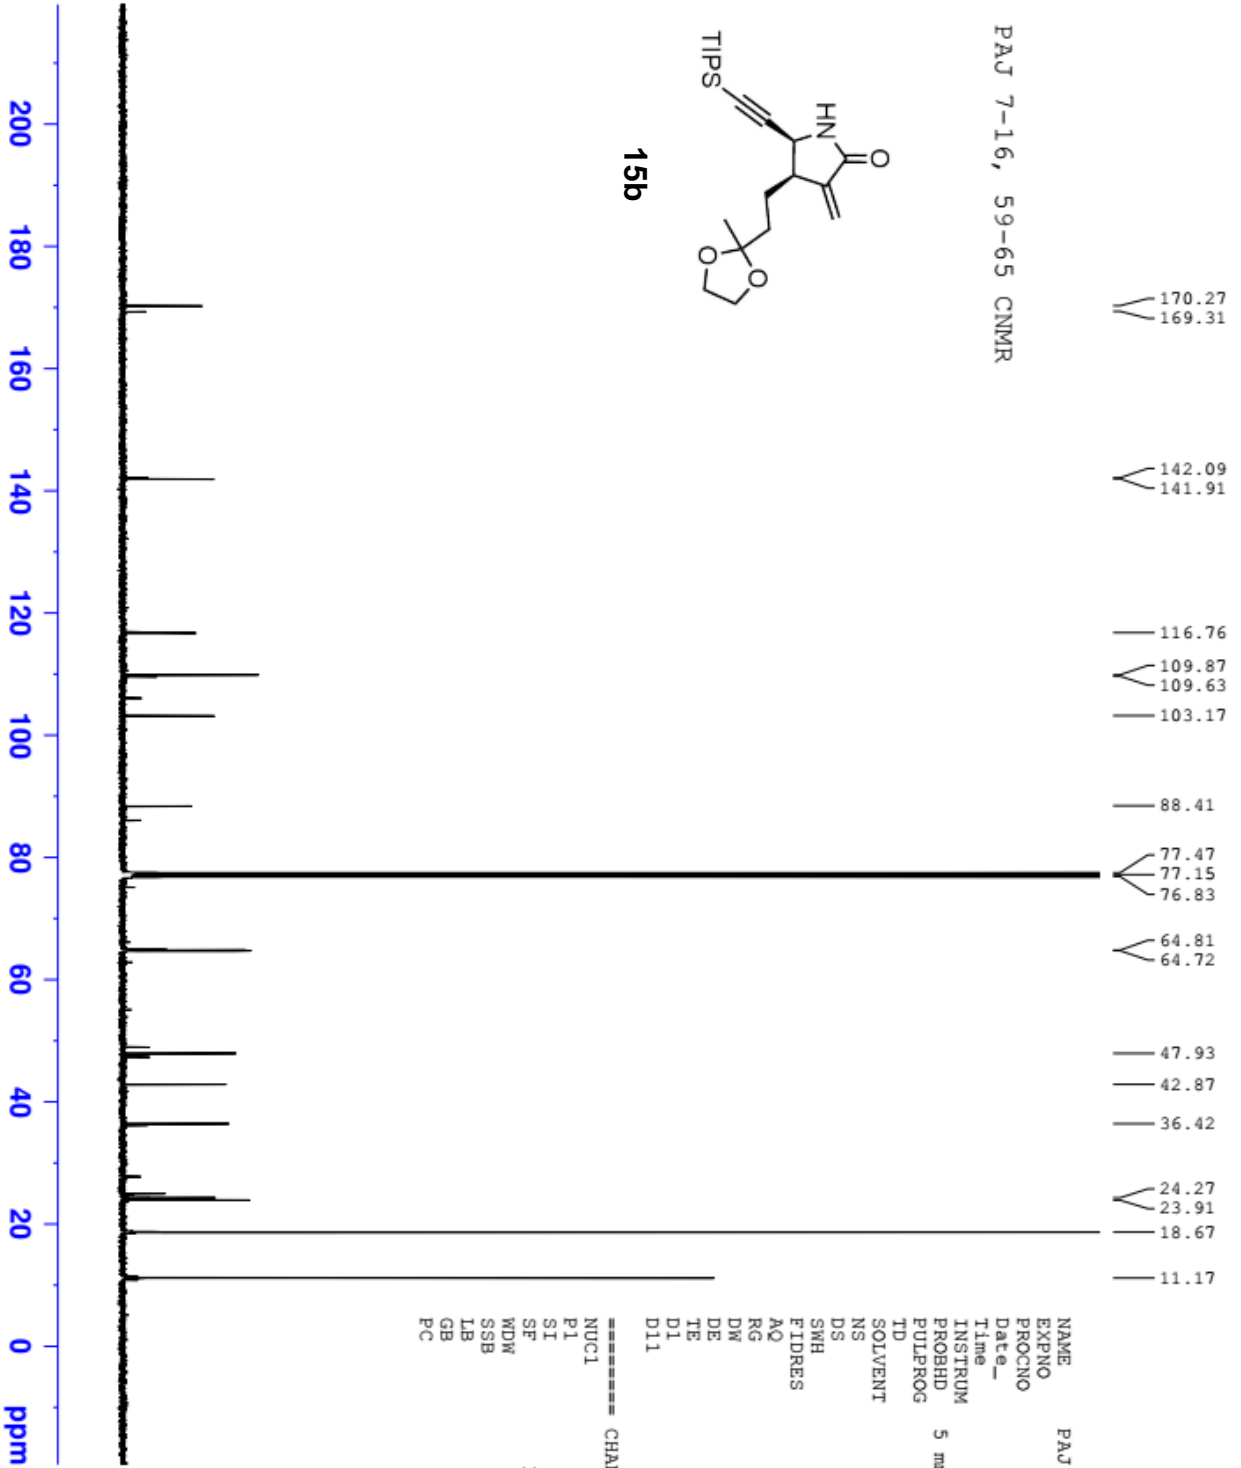

```

NAME          PAJ 7-16, 59-65
EXPNO         11
PROCNO        1
Date_         20150314
Time_         22.37
INSTRUM       spect
PROBHD        5 mm PABBO BB-
PULPROG       zgpg30
TD            65536
SOLVENT       CDCl3
NS            2048
DS            4
SWH           24038.461 Hz
FIDRES        0.366798 Hz
AQ            1.3631988 sec
RG            203
DW            20.800 usec
DE            6.50 usec
TE            311.5 K
D1            2.00000000 sec
D11           0.03000000 sec

===== CHANNEL f1 =====
NUC1          13C
P1            10.00 usec
SI            32768
SF            100.6127572 MHz
WDW           EM
SSB           0
LB            1.00 Hz
GB            0
PC            1.40
  
```



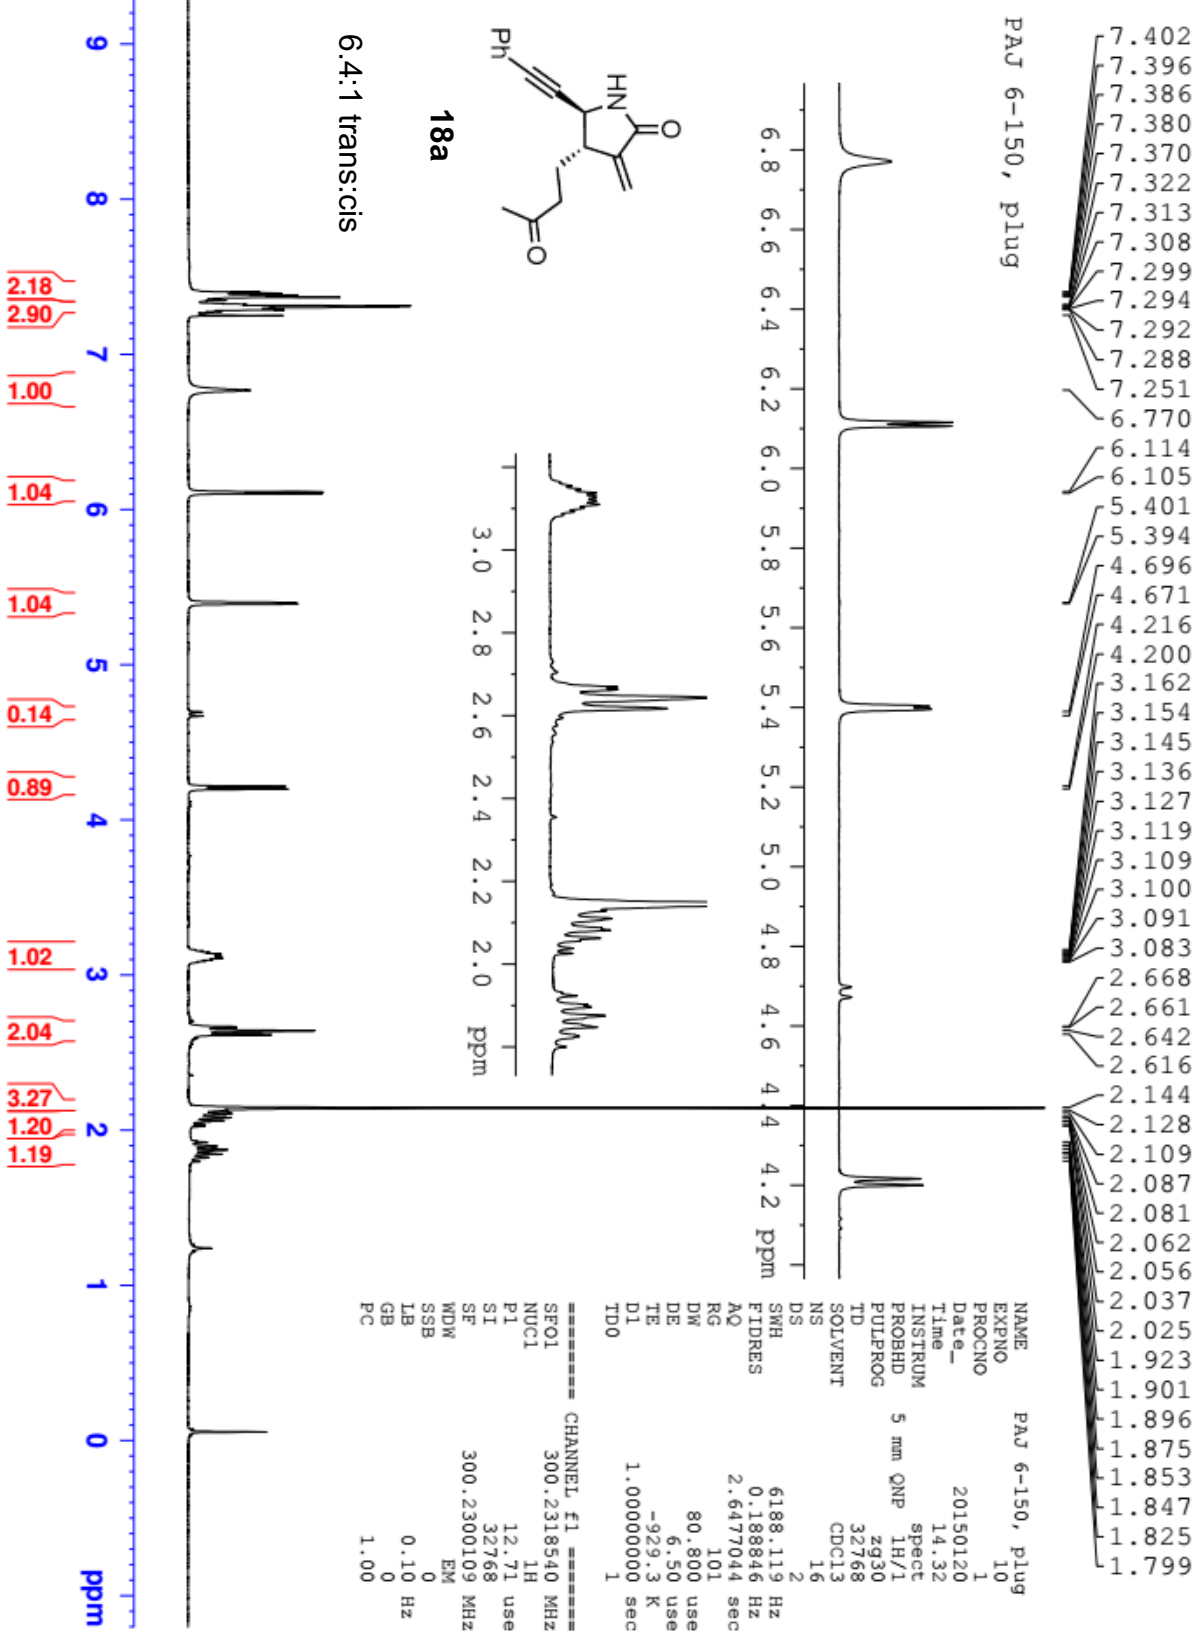

- 207.92
- 207.49
- 170.14
- 169.47
- 141.77
- 131.82
- 128.93
- 128.51
- 122.07
- 117.40
- 87.43
- 87.01
- 84.86
- 84.65
- 77.47
- 77.15
- 76.83
- 48.83
- 47.50
- 46.12
- 41.61
- 40.52
- 39.94
- 30.25
- 30.18
- 26.99
- 24.39

PAJ 6-150, plug

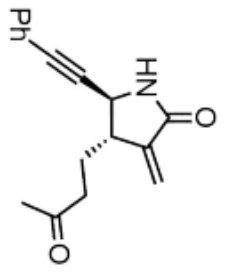

18a

6.4:1 trans:cis

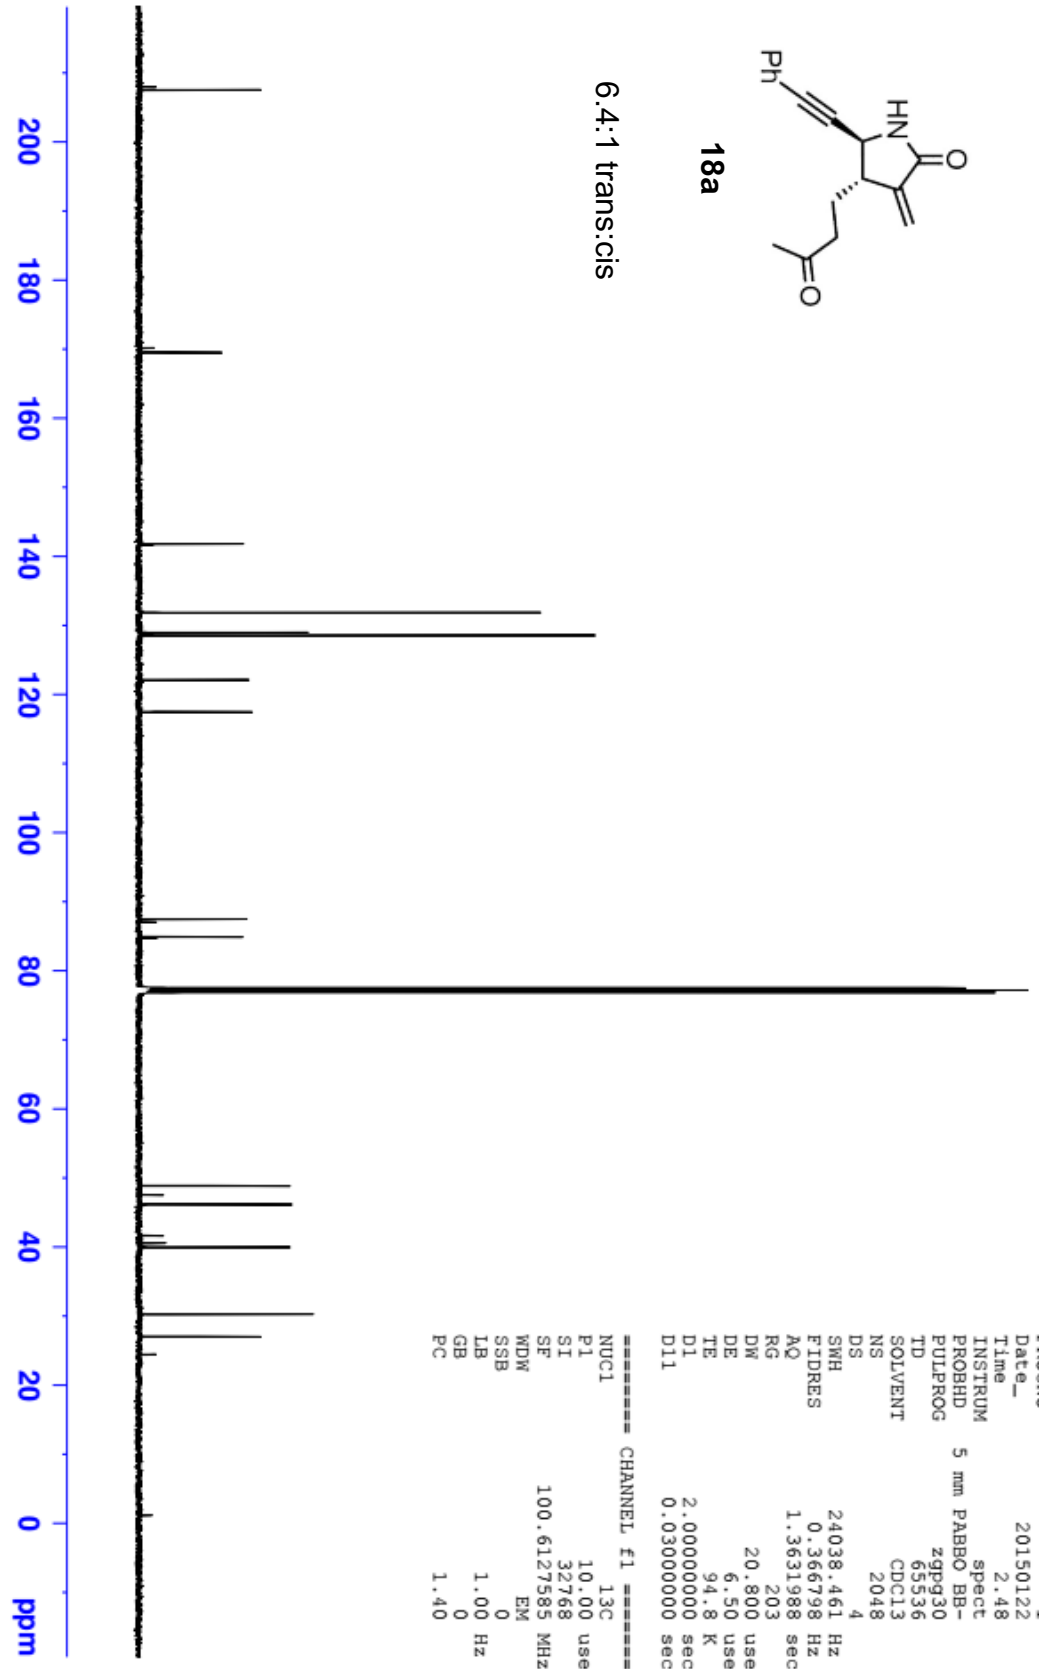

```

NAME          PAJ 6-150, plug
EXPNO         10
PROCNO        1
Date_         20150122
Time_         2.48
INSTRUM       spect
PROBHD        5 mm PABBO BB-
PULPROG       zgpg30
TD            65536
SOLVENT       CDCl3
NS           2048
DS            4
SWH           24038.461 Hz
FIDRES       0.366798 Hz
AQ           1.3631988 sec
RG           203
DW           20.800 usec
DE           6.50 usec
TE           94.8 K
D1           2.00000000 sec
D11          0.03000000 sec

----- CHANNEL f1 -----
NUC1          13C
P1           10.00 usec
S1           32768
SF           100.6127585 MHz
WDW          EM
SSB          0
LB           1.00 Hz
GB           0
PC           1.40
  
```

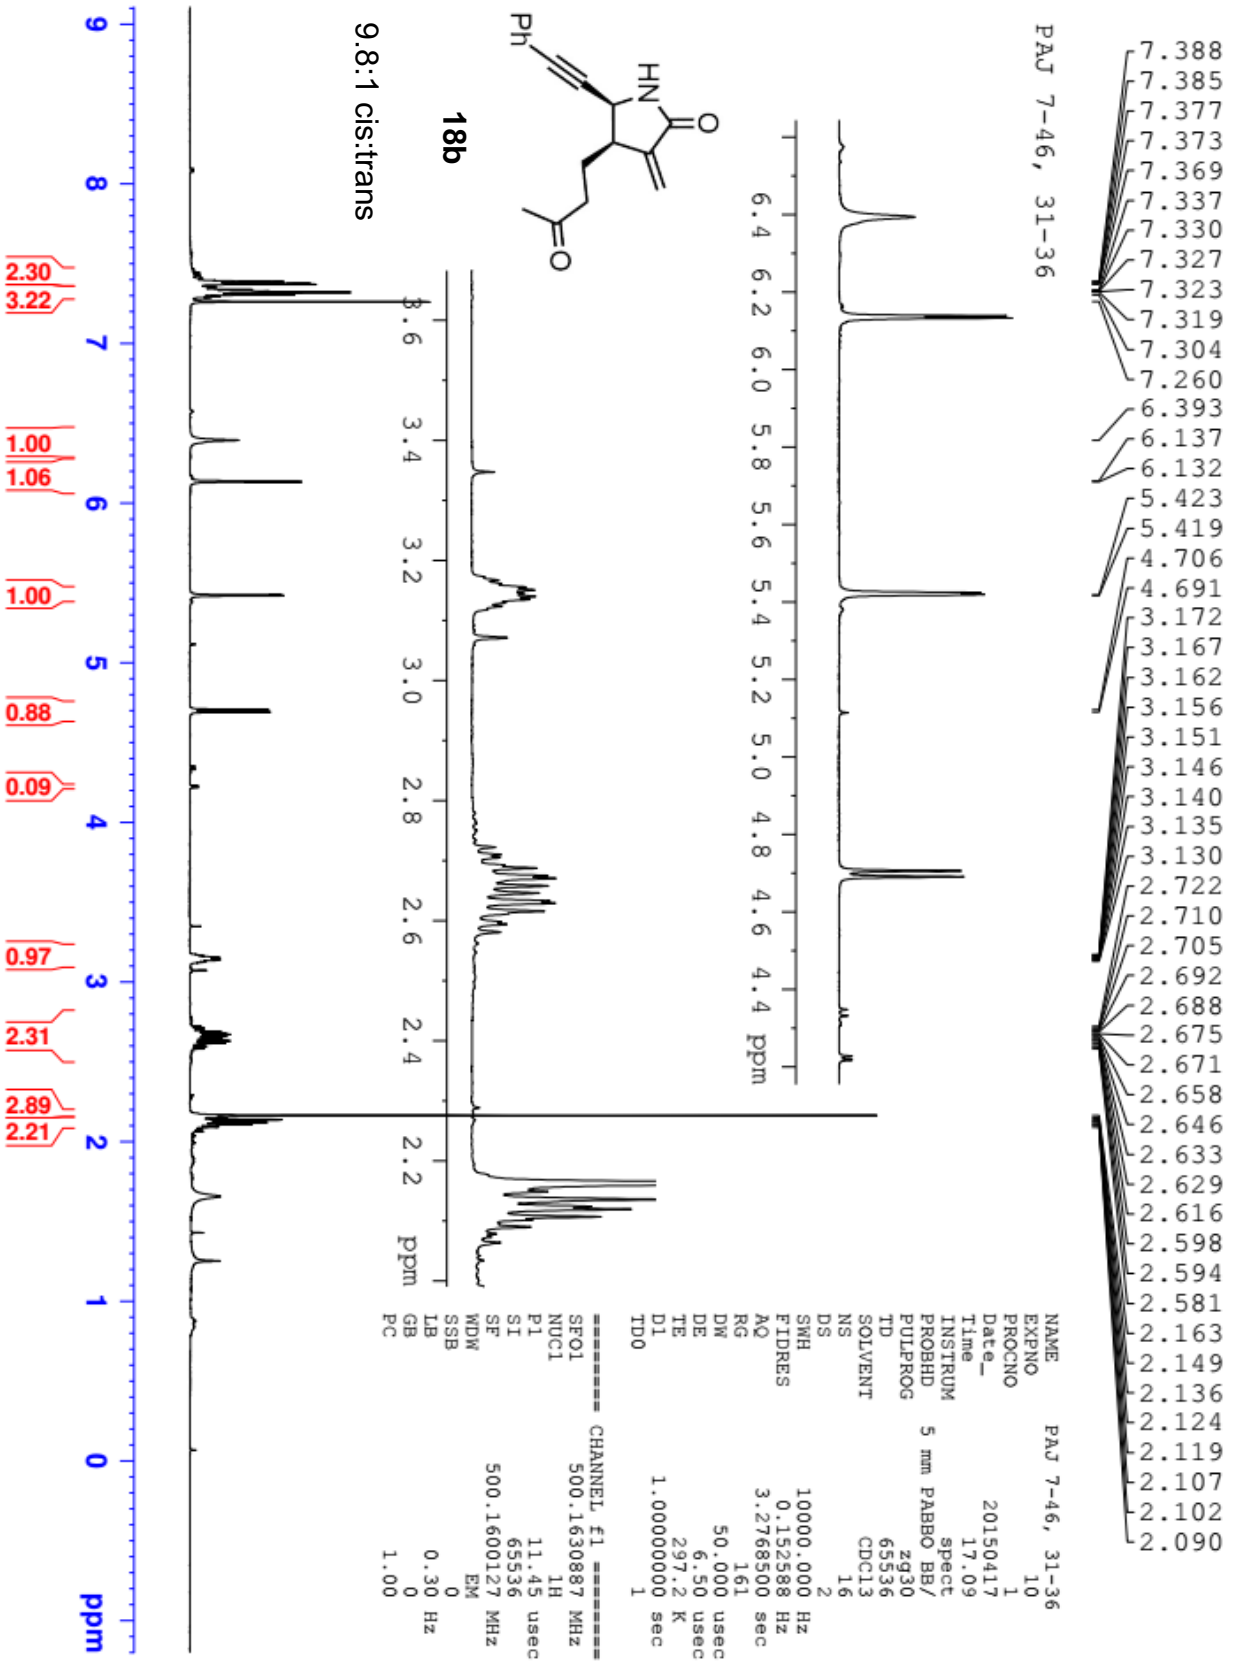

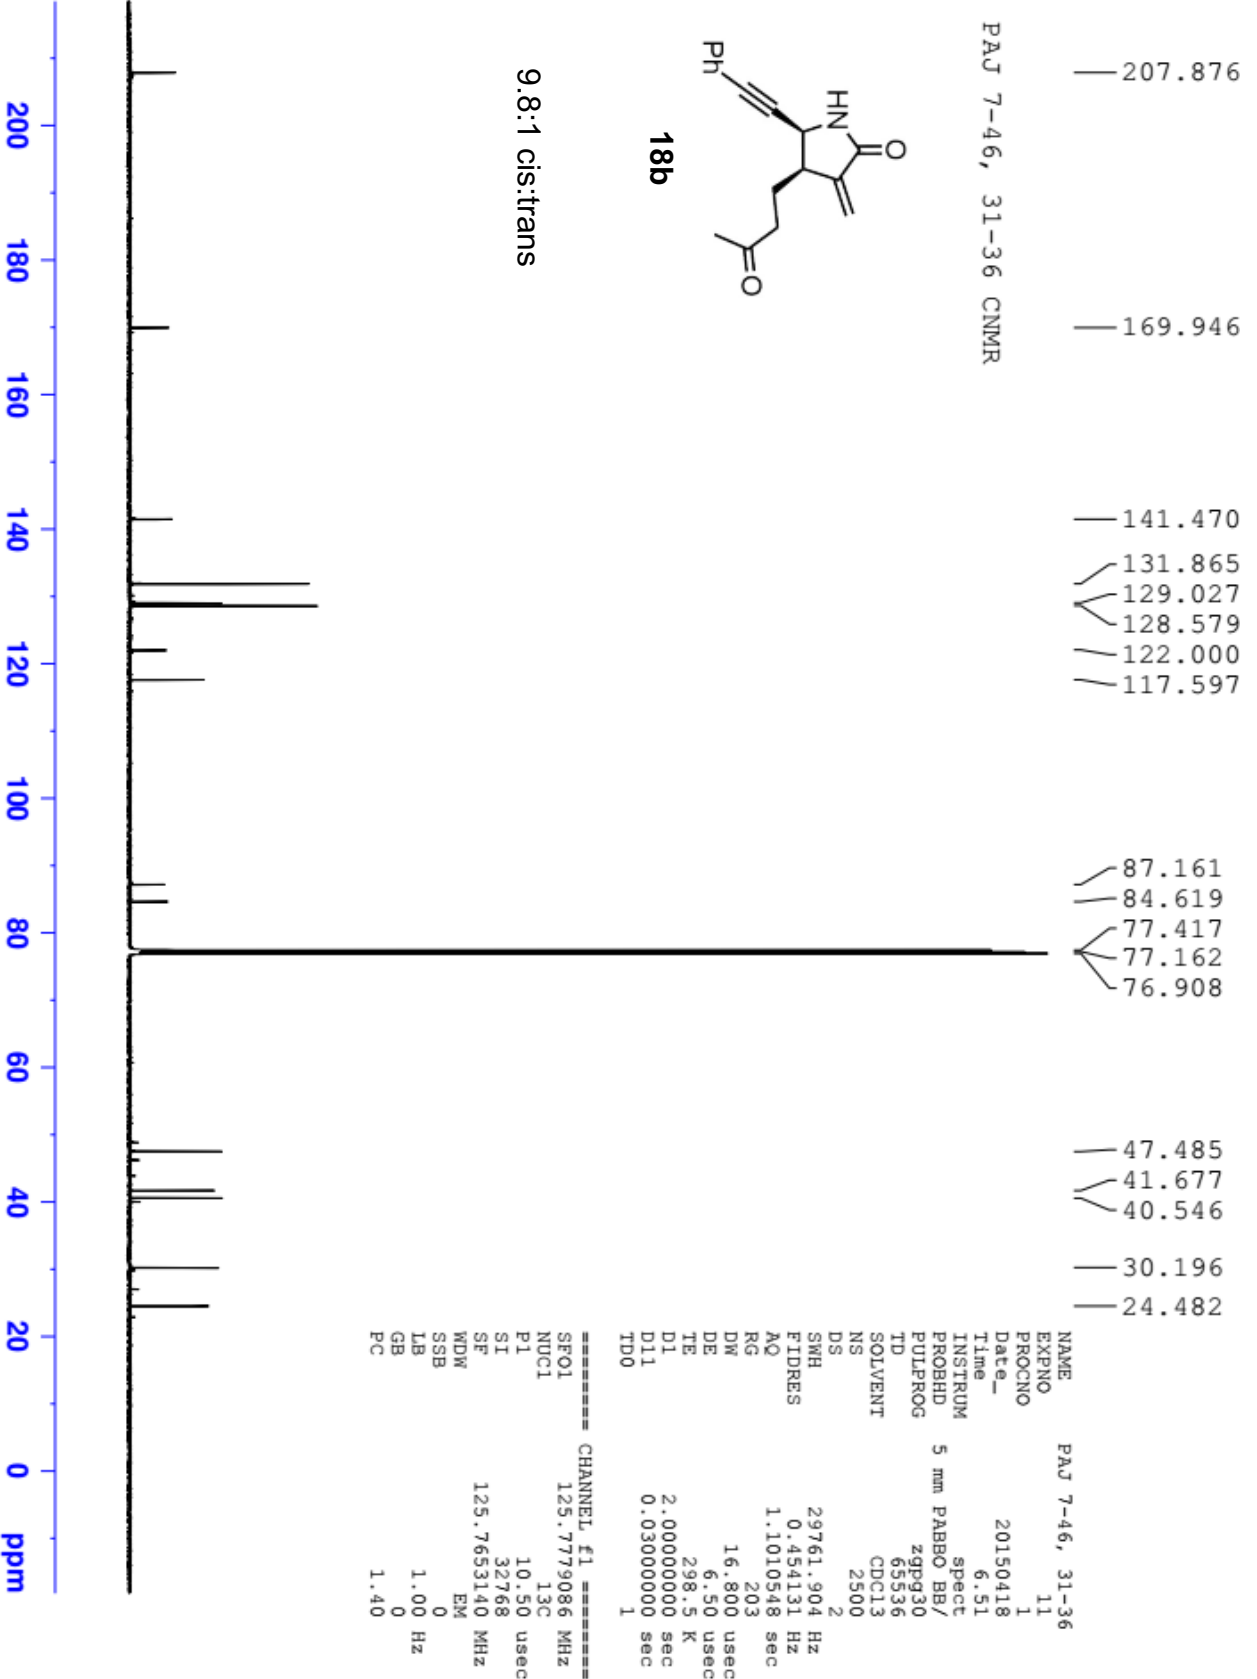

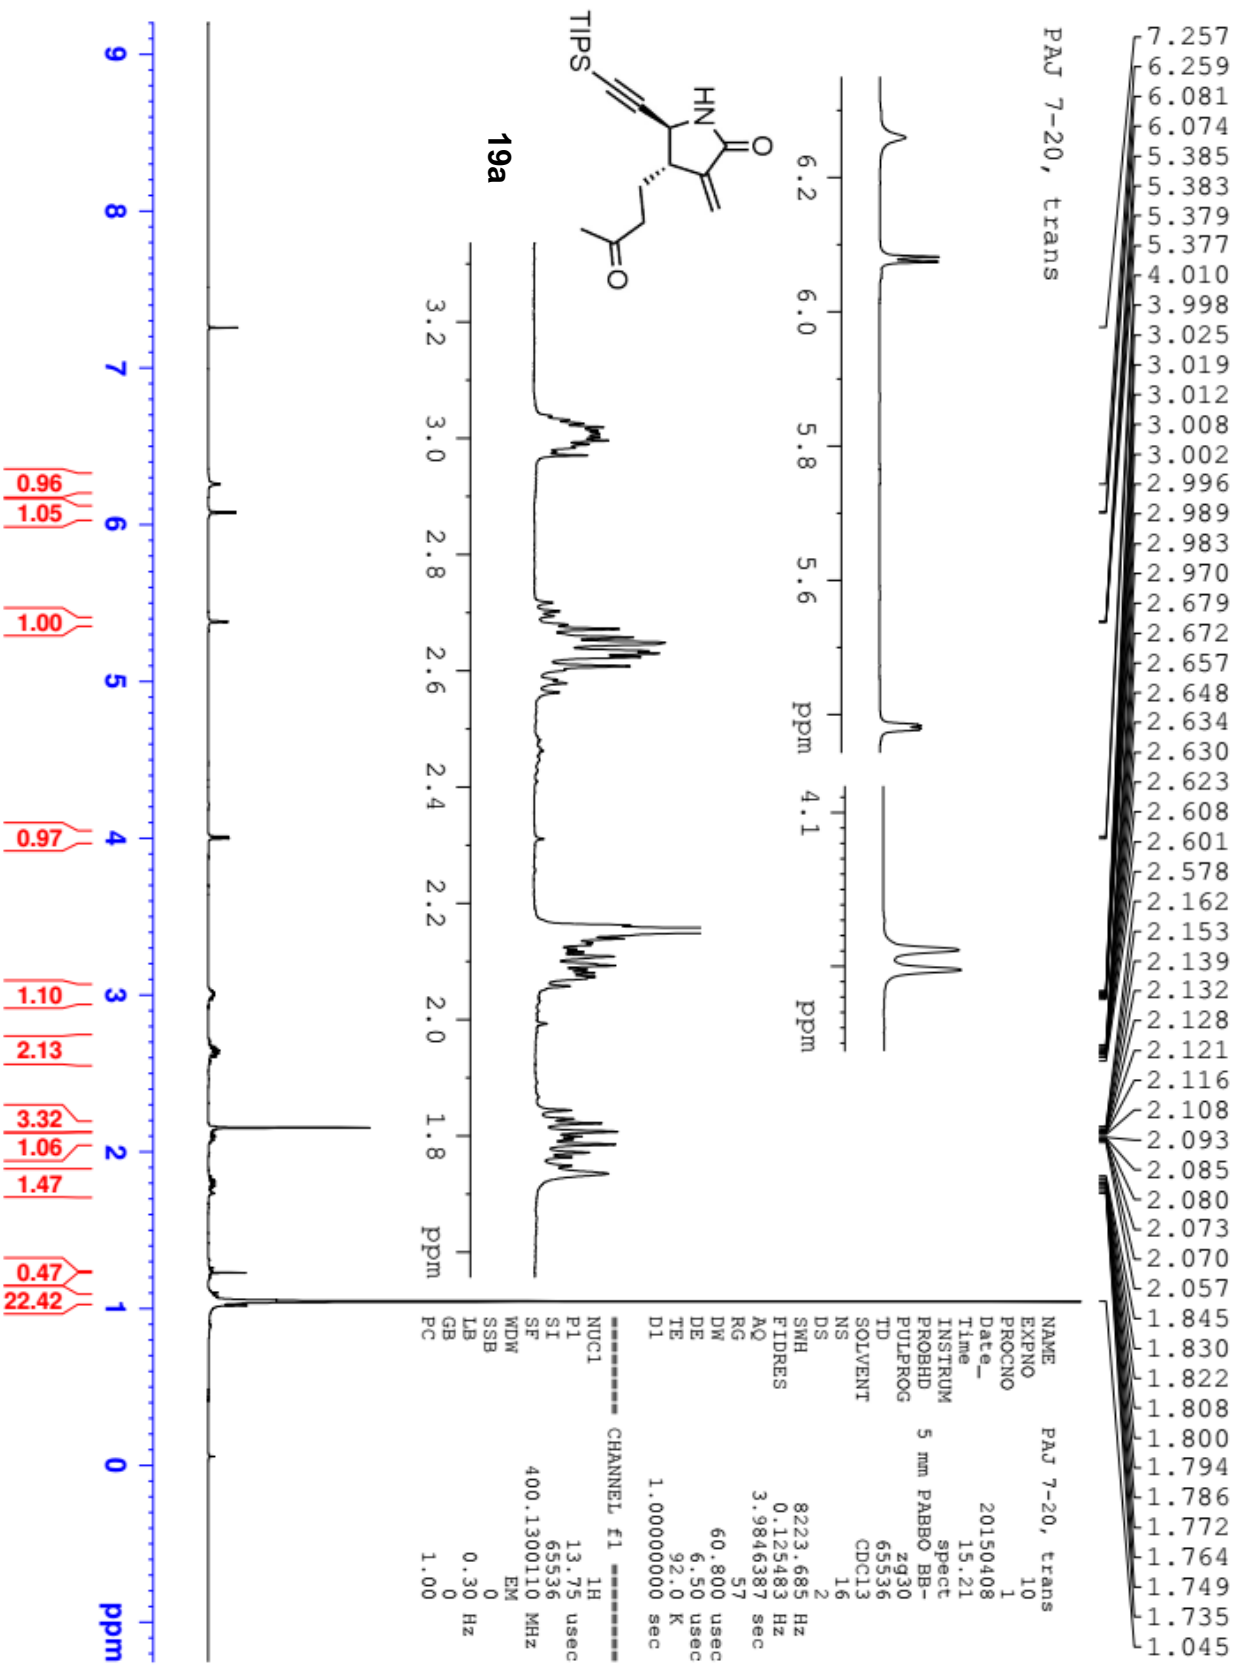

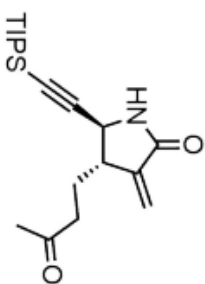

19a

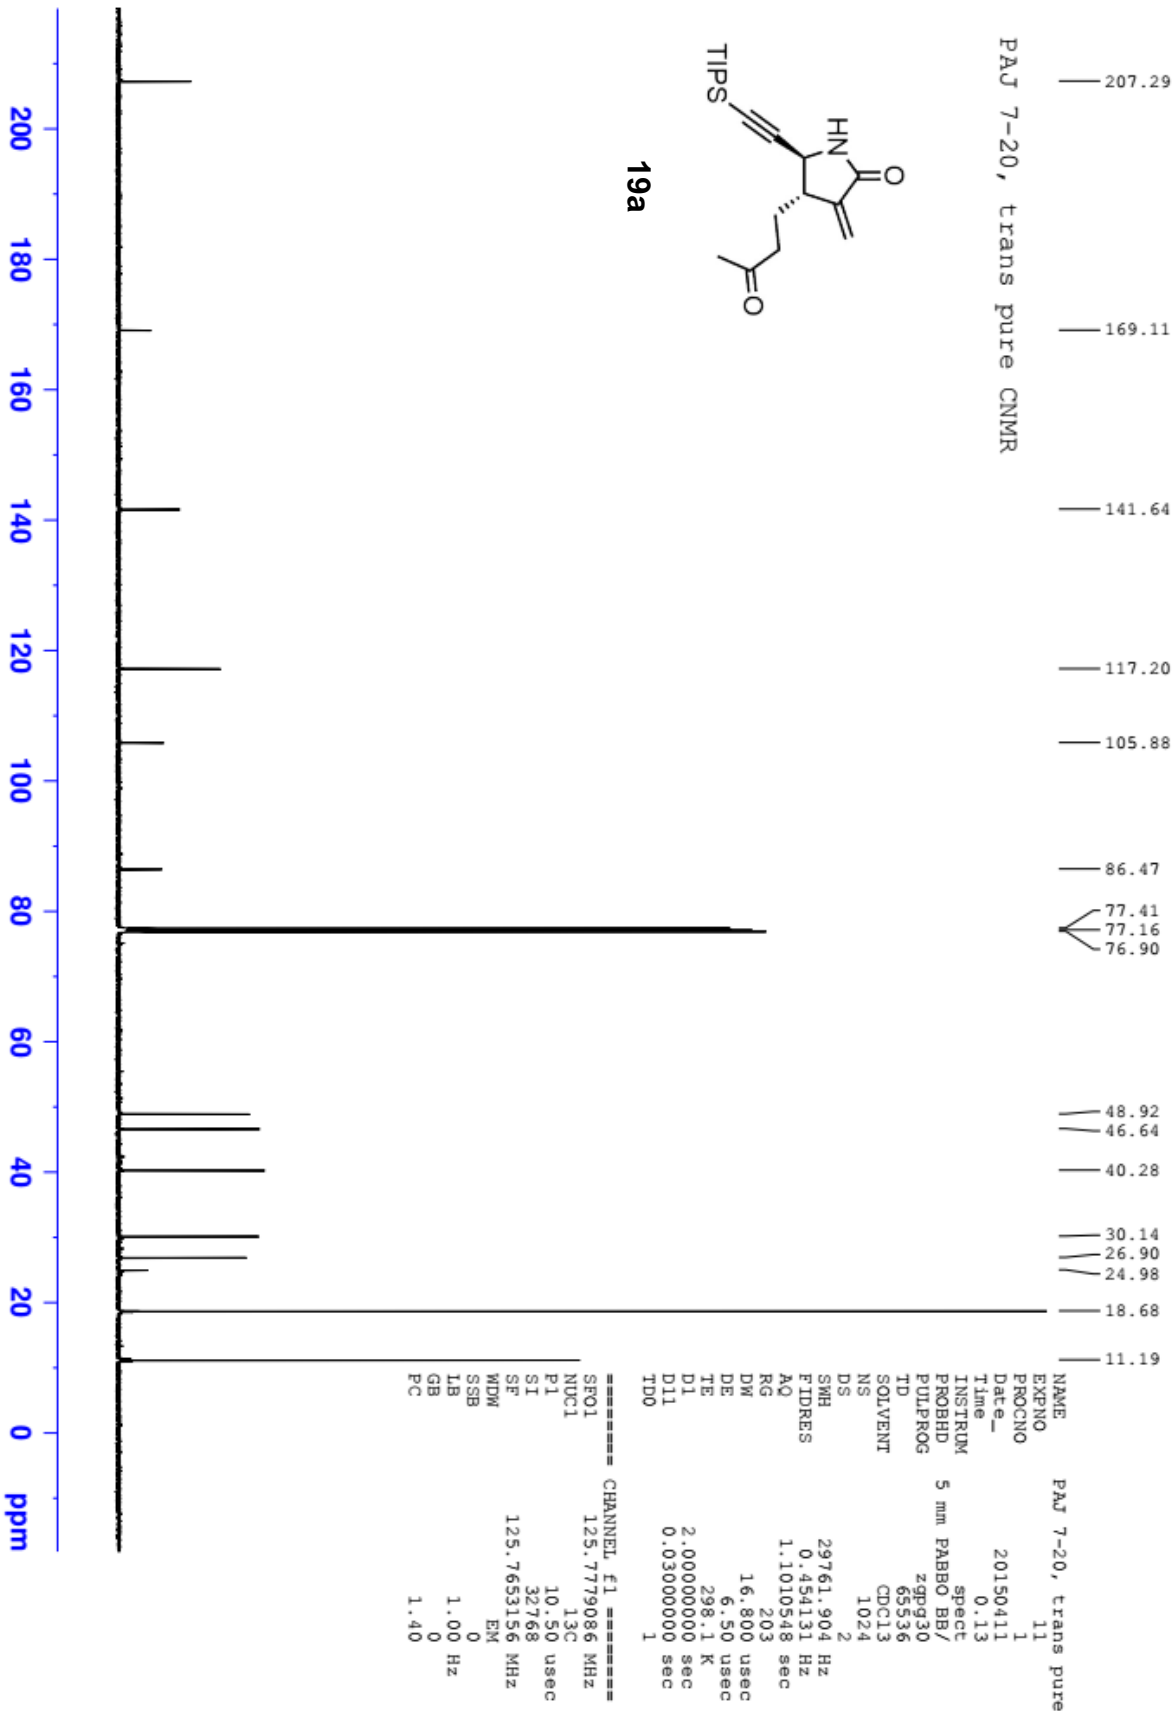

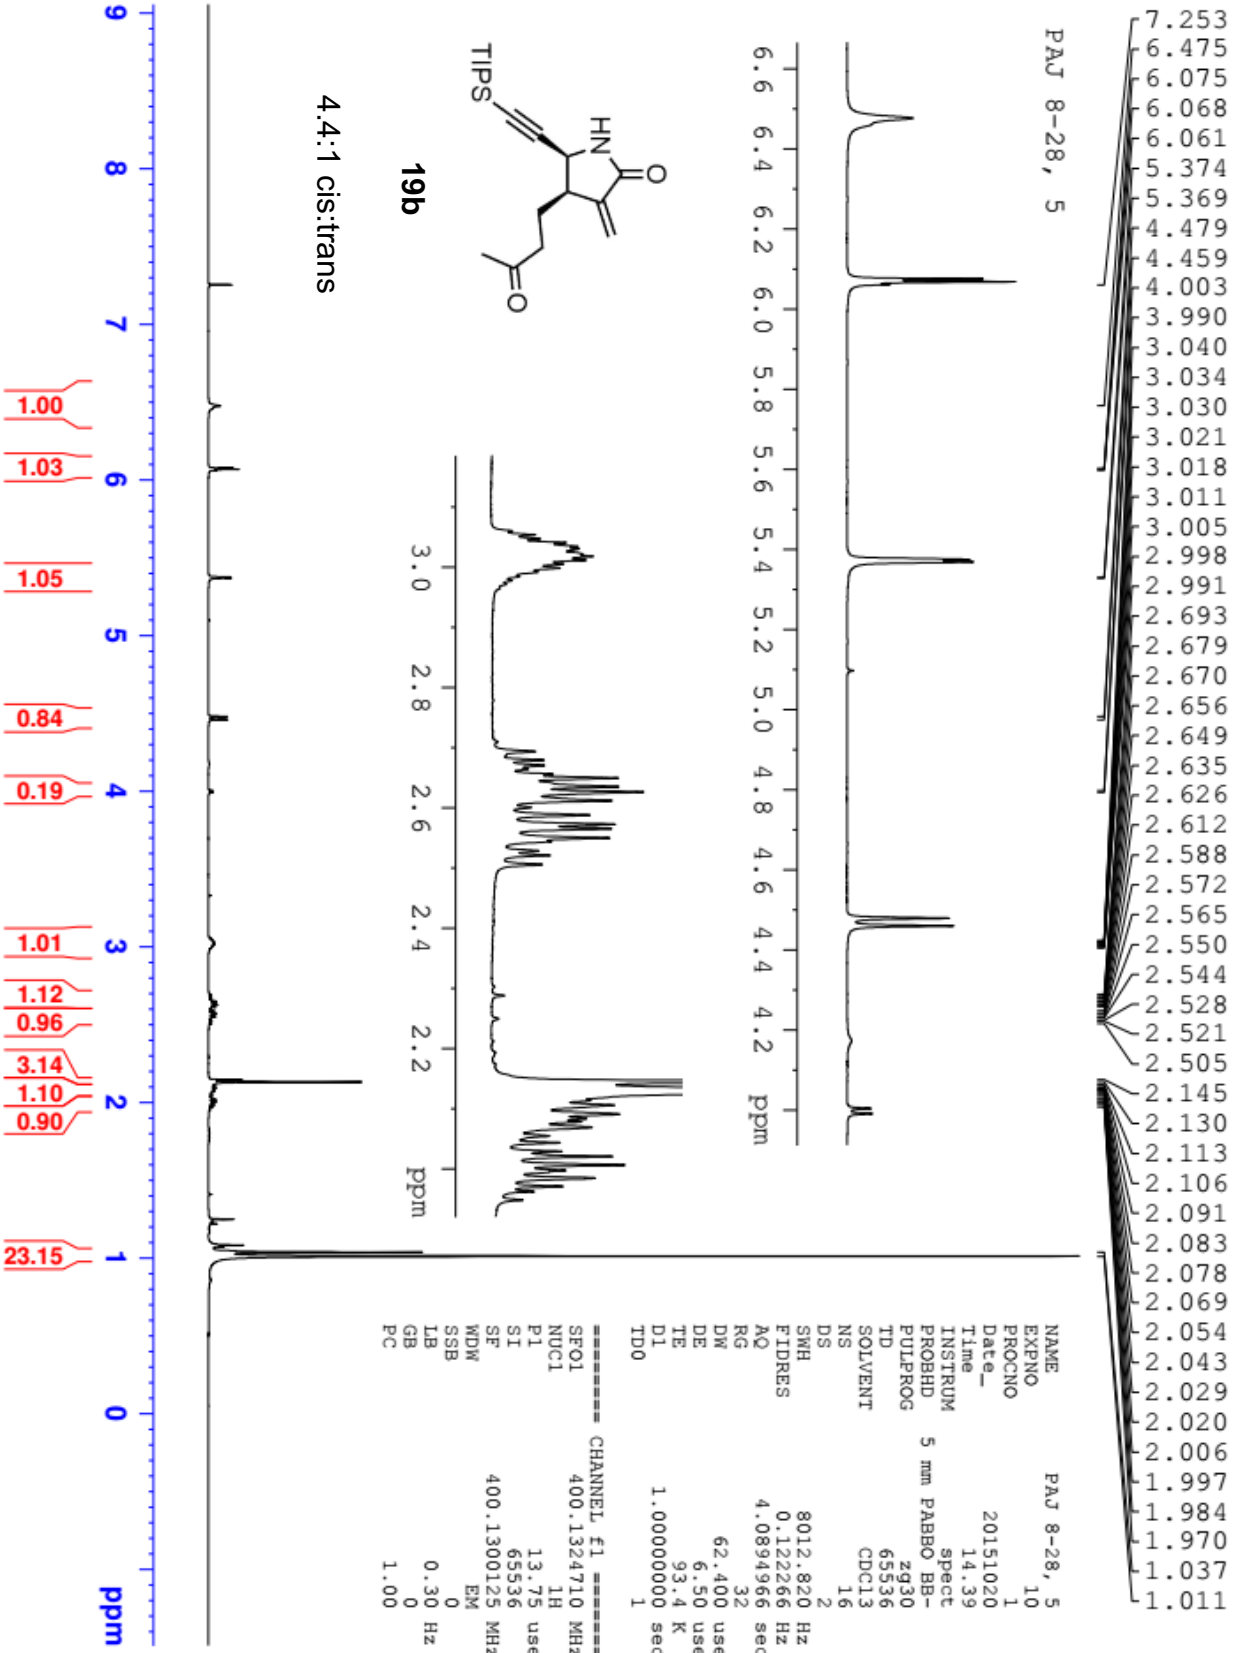

207.54  
 169.98  
 141.48  
 117.28  
 102.76  
 88.77  
 77.47  
 77.15  
 76.84  
 47.51  
 41.33  
 40.53  
 30.03  
 24.26  
 18.63  
 11.15

PAJ 8-28, 5 CNMR

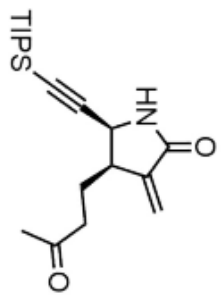

19b

4.4:1 cis:trans

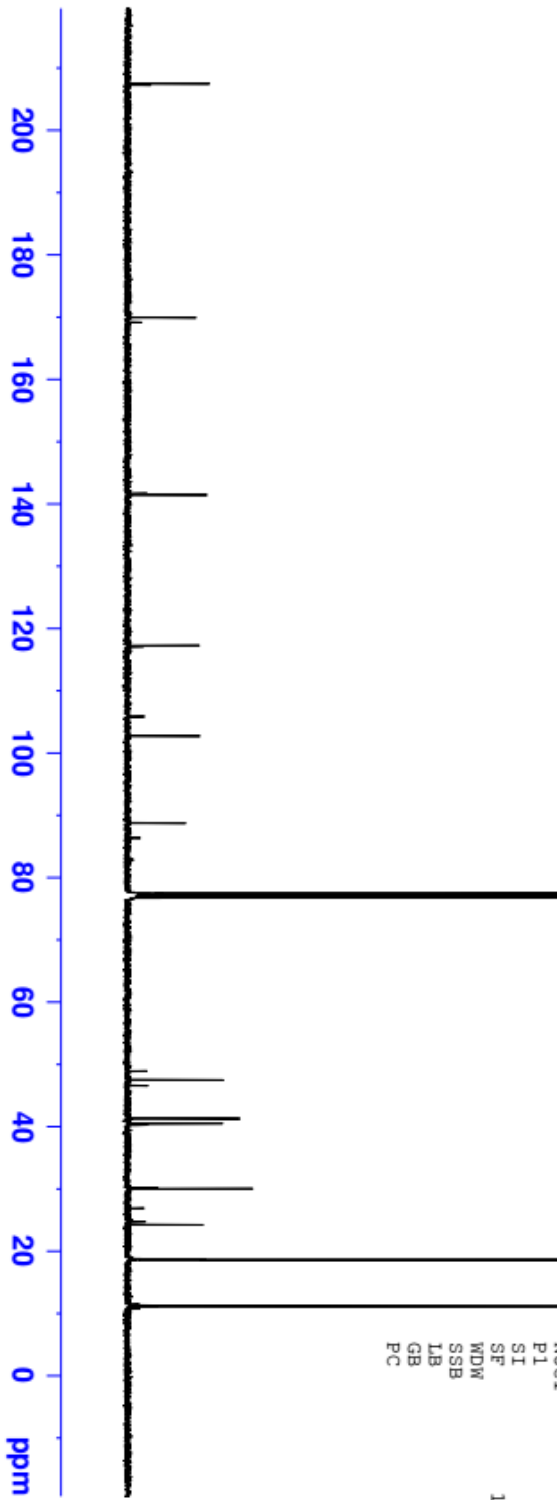

```

NAME          PAJ 8-28, 5
EXPNO         11
PROCNO        1
Date_         20151021
Time         0.57
INSTRUM       spect
PROBHD        5 mm PABBO BB-
PULPROG       zgpg30
TD            65536
SOLVENT       CDCl3
NS           1024
DS           4
SWH          24038.461 Hz
FIDRES       0.366798 Hz
AQ           1.3631988 sec
RG           203
DW           20.800 usec
DE           6.50 usec
TE           96.7 K
D1           2.00000000 sec
D11          0.03000000 sec
TD0          1

===== CHANNEL f1 =====
SF01         100.6228293 MHz
NUC1         13C
P1           10.00 usec
SI           32768
SF          100.6127568 MHz
WDW          EM
SSB          0
LB           1.00 Hz
GB           0
PC           1.40
  
```



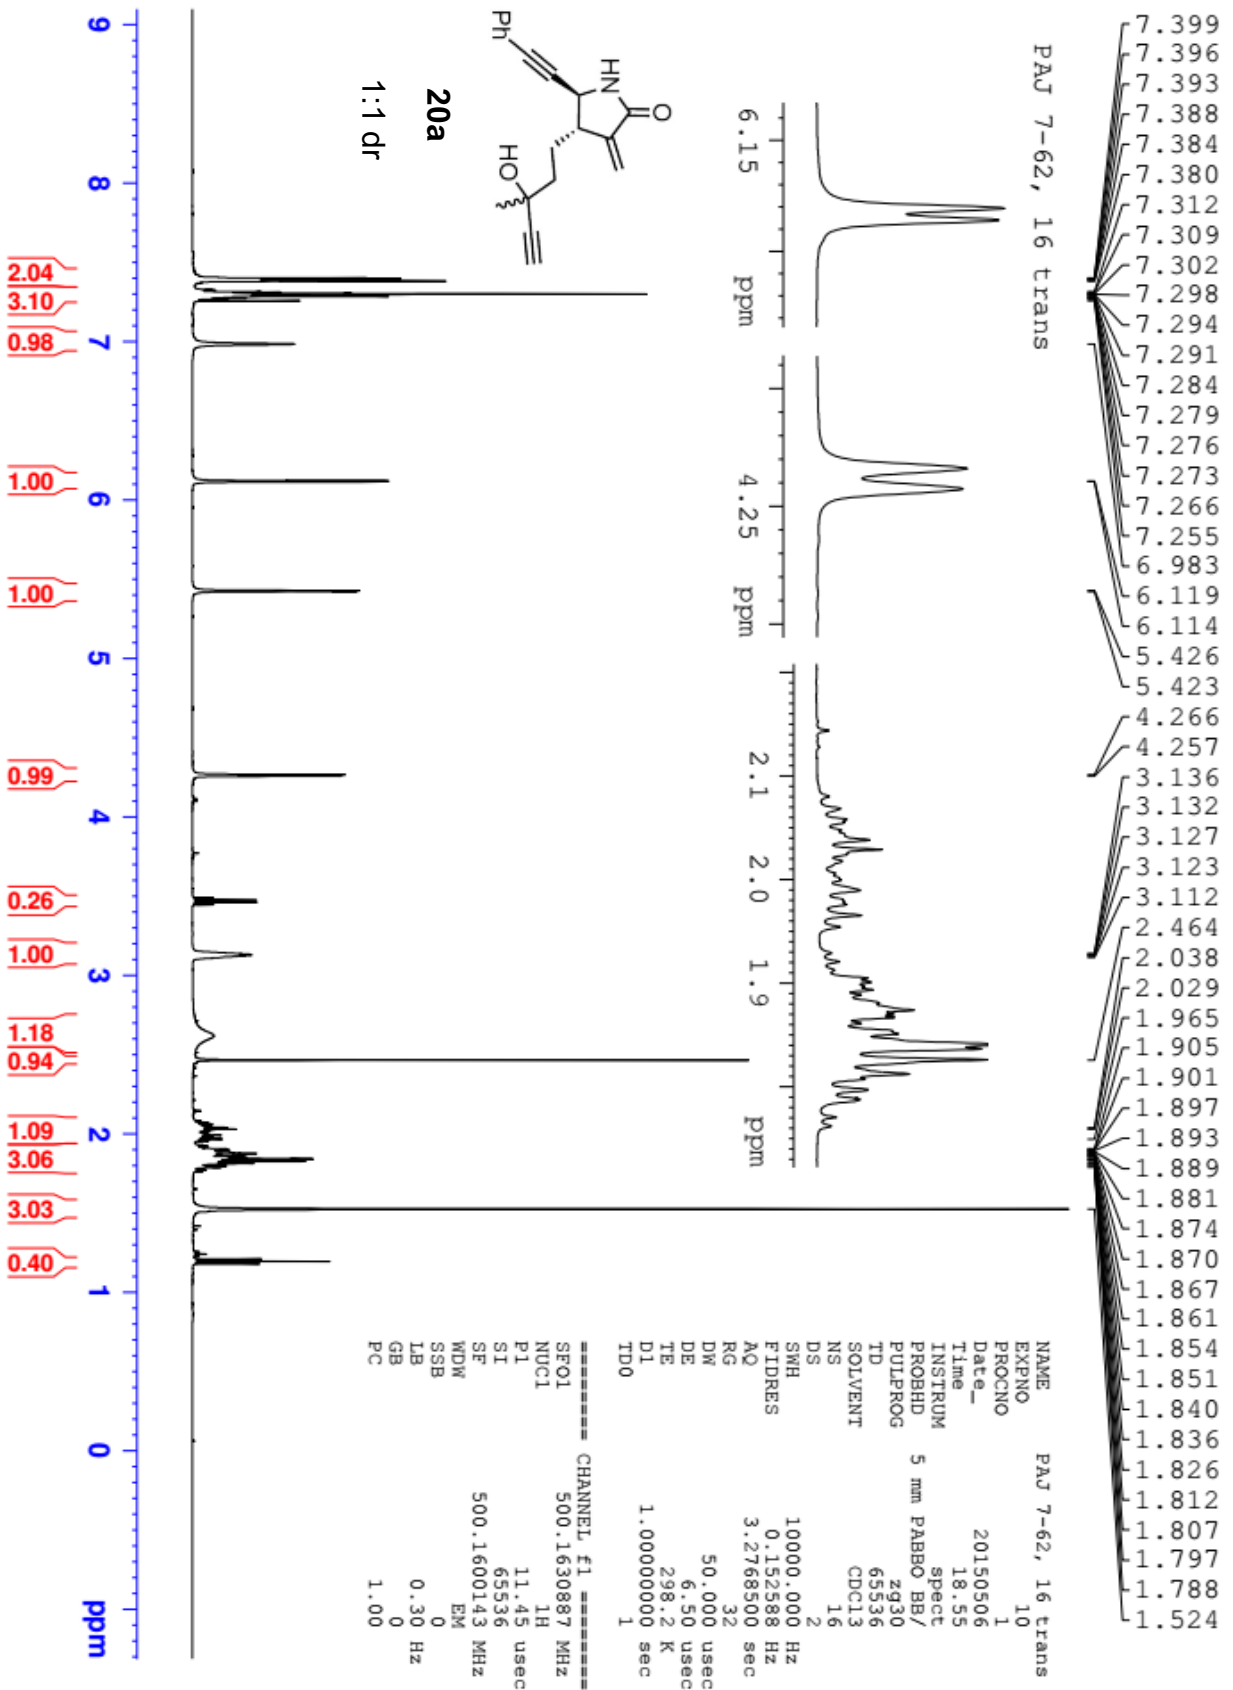

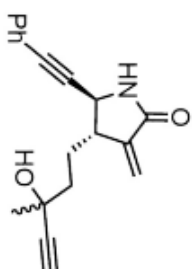

20a

1:1 dr

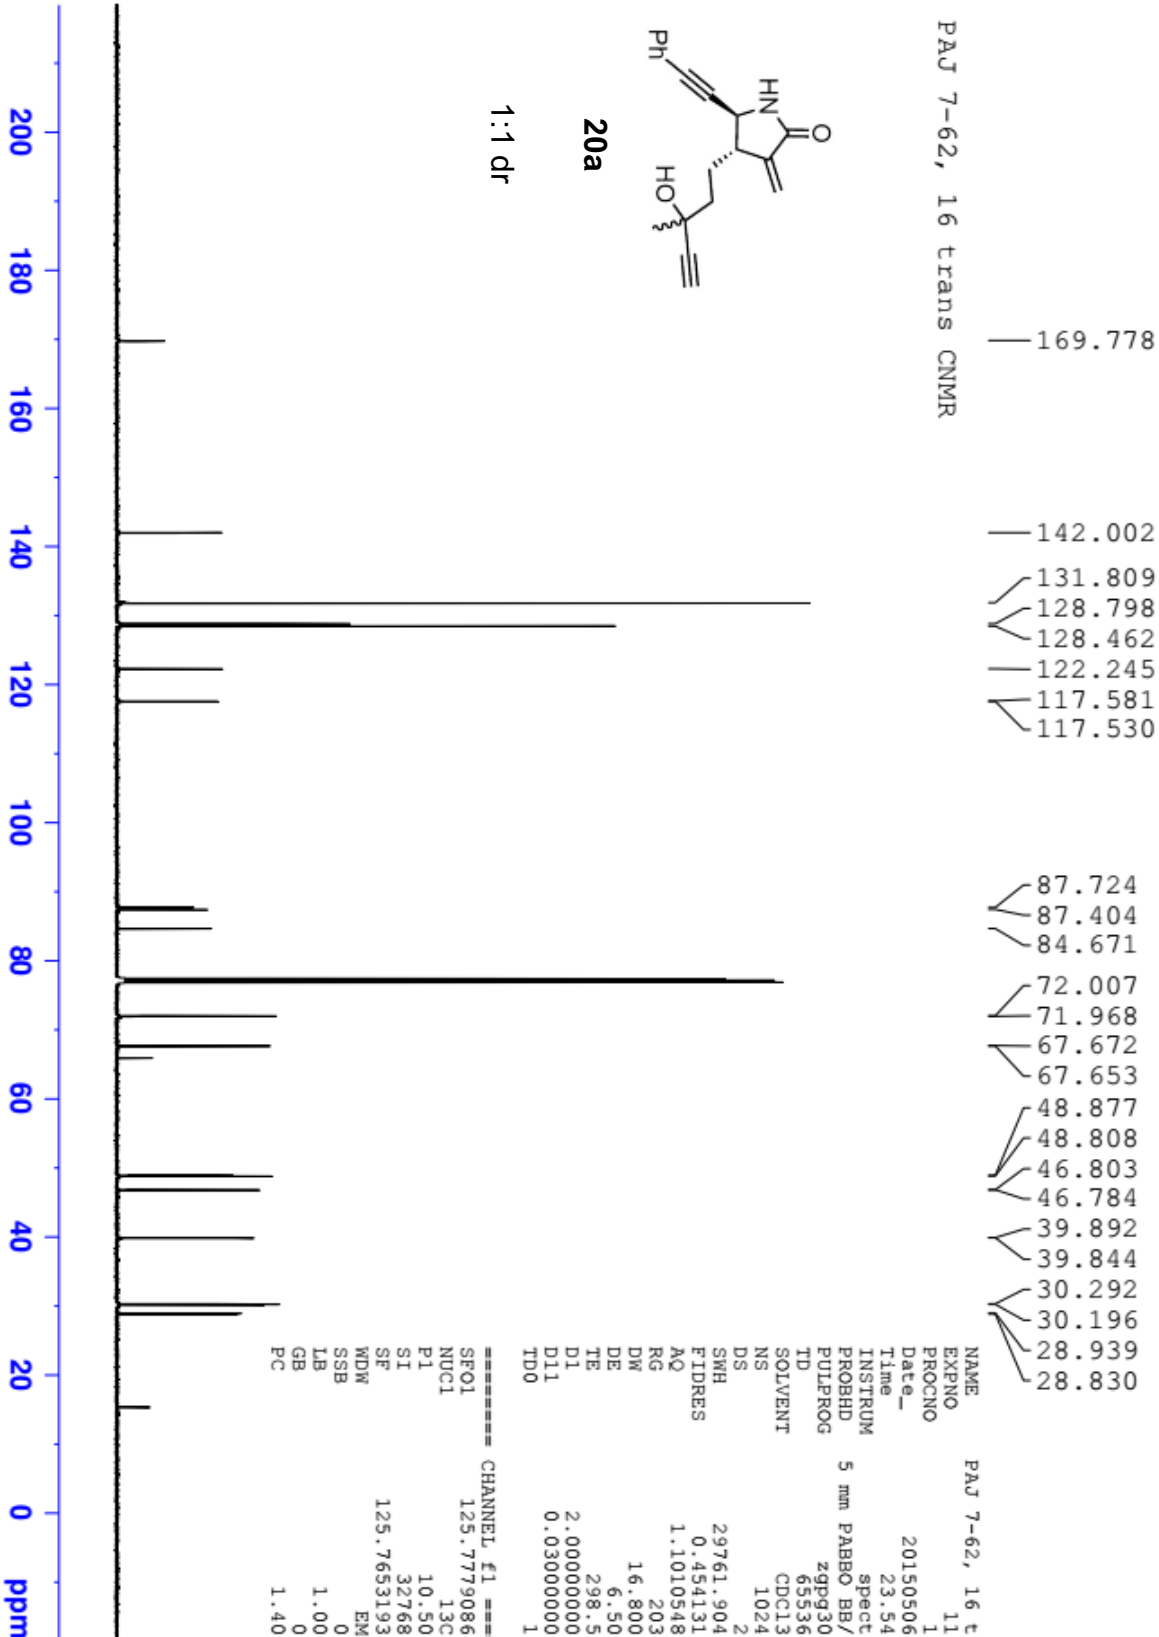

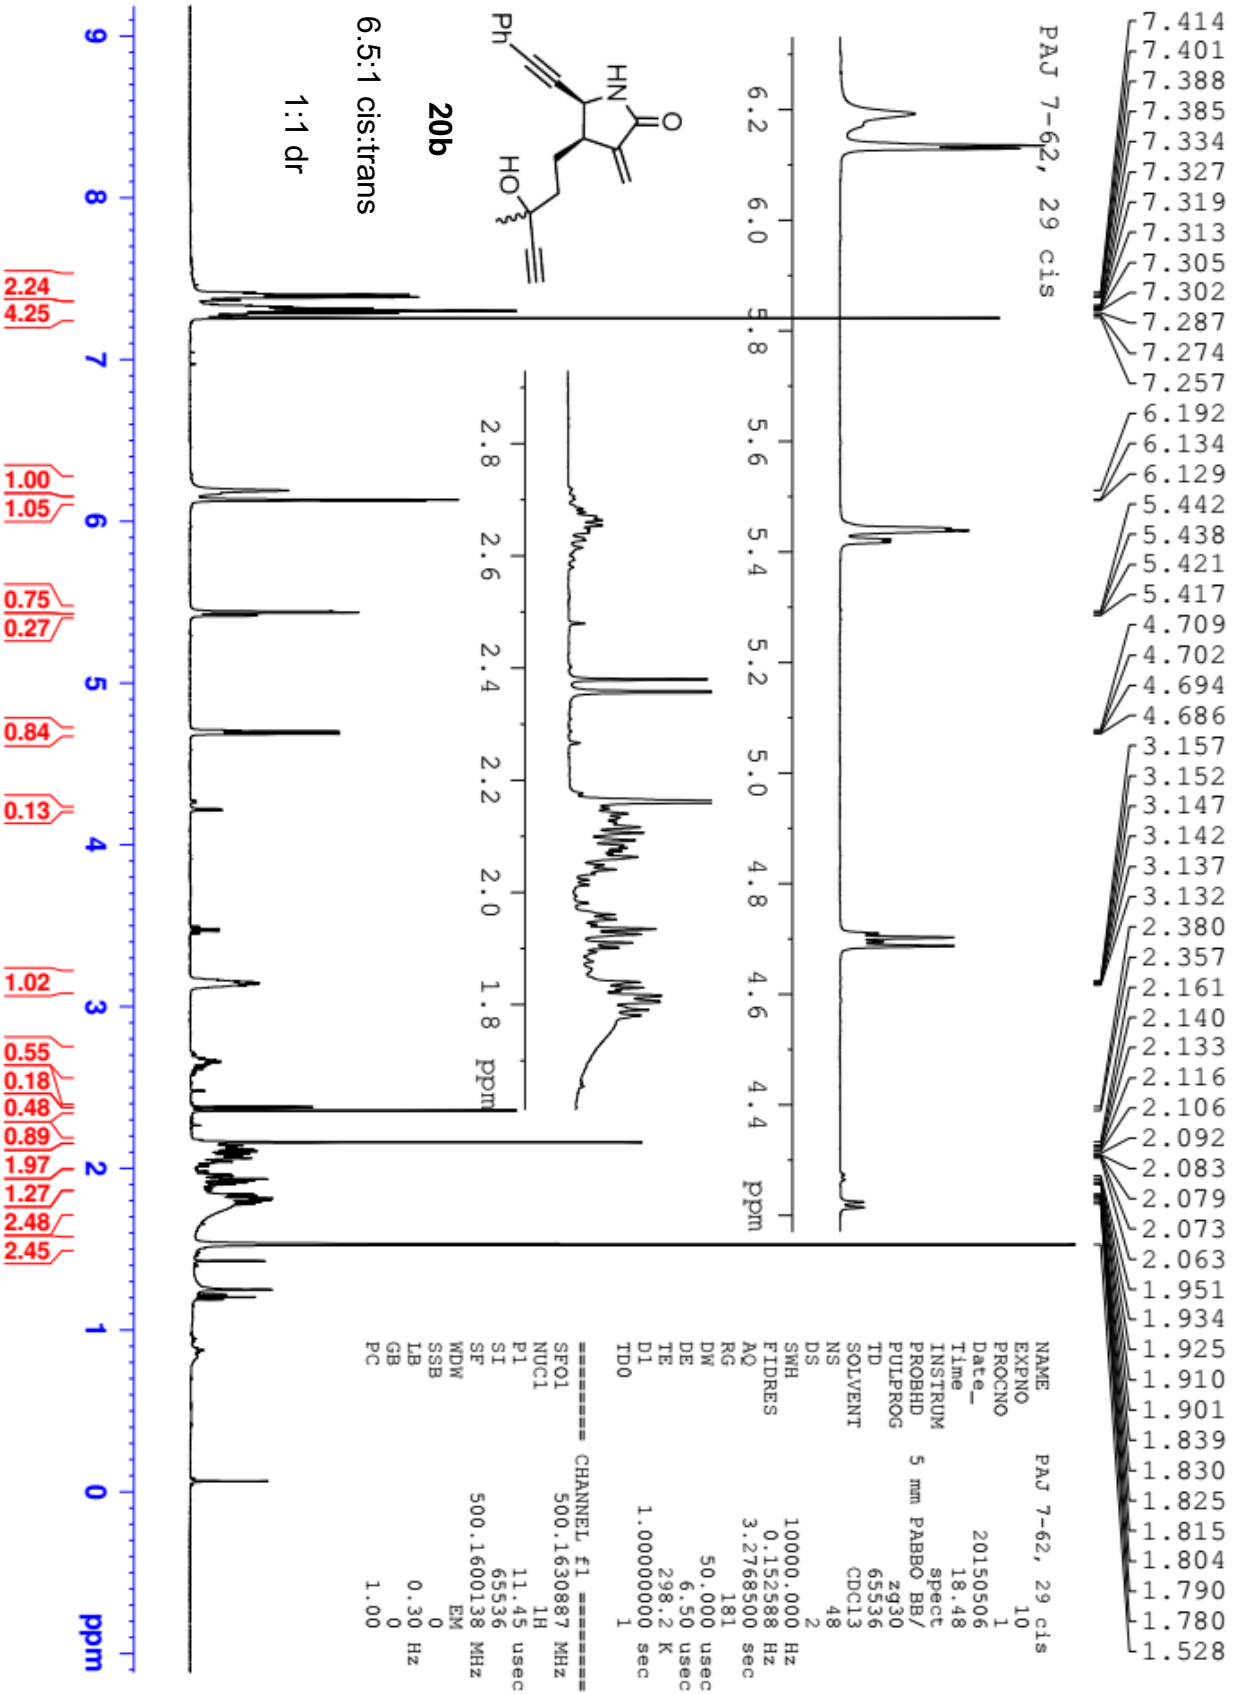

207.867  
 170.205  
 141.655  
 131.900  
 131.854  
 131.843  
 129.019  
 128.874  
 128.579  
 128.462  
 122.235  
 121.976  
 117.643  
 117.585  
 117.325  
 117.223  
 87.477  
 87.347  
 87.239  
 86.987  
 86.884  
 84.994  
 84.876  
 84.595  
 77.407  
 77.152  
 76.898  
 72.101  
 71.928  
 67.971  
 67.811  
 48.761  
 47.742  
 47.712  
 47.450  
 46.227  
 42.736  
 42.716  
 41.681  
 40.546  
 40.506  
 39.990  
 30.373  
 30.259  
 30.193  
 30.063  
 29.835

PAJ 7-62, 29 cis CNMR

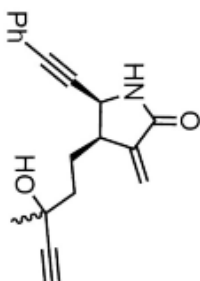

20b

6.5:1 cis:trans

1:1 dr

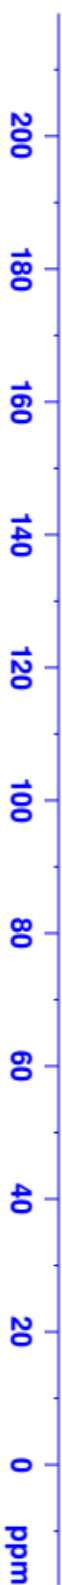

```

NAME          PAJ 7-62, 29 cis
EXPNO         11
PROCNO        1
Date_         20150507
Time          2.38
INSTRUM       spect
PROBHD        5 mm PABBO BB/
PULPROG       zgpg30
TD            65536
SOLVENT       CDCl3
NS            3000
DS            2
SWH           29761.904 Hz
FIDRES        0.454131 Hz
AQ            1.1010548 sec
RG            203
DW            16.800 usec
DE            6.50 usec
TE            298.6 K
D1            2.00000000 sec
D11           0.03000000 sec
TD0           1

===== CHANNEL f1 =====
SF01          125.7779086 MHz
NUC1          13C
P1            10.50 usec
SI            32768
SF           125.7653144 MHz
WDW           EM
SSB           0
LB            1.00 Hz
GB            0
PC            1.40
  
```

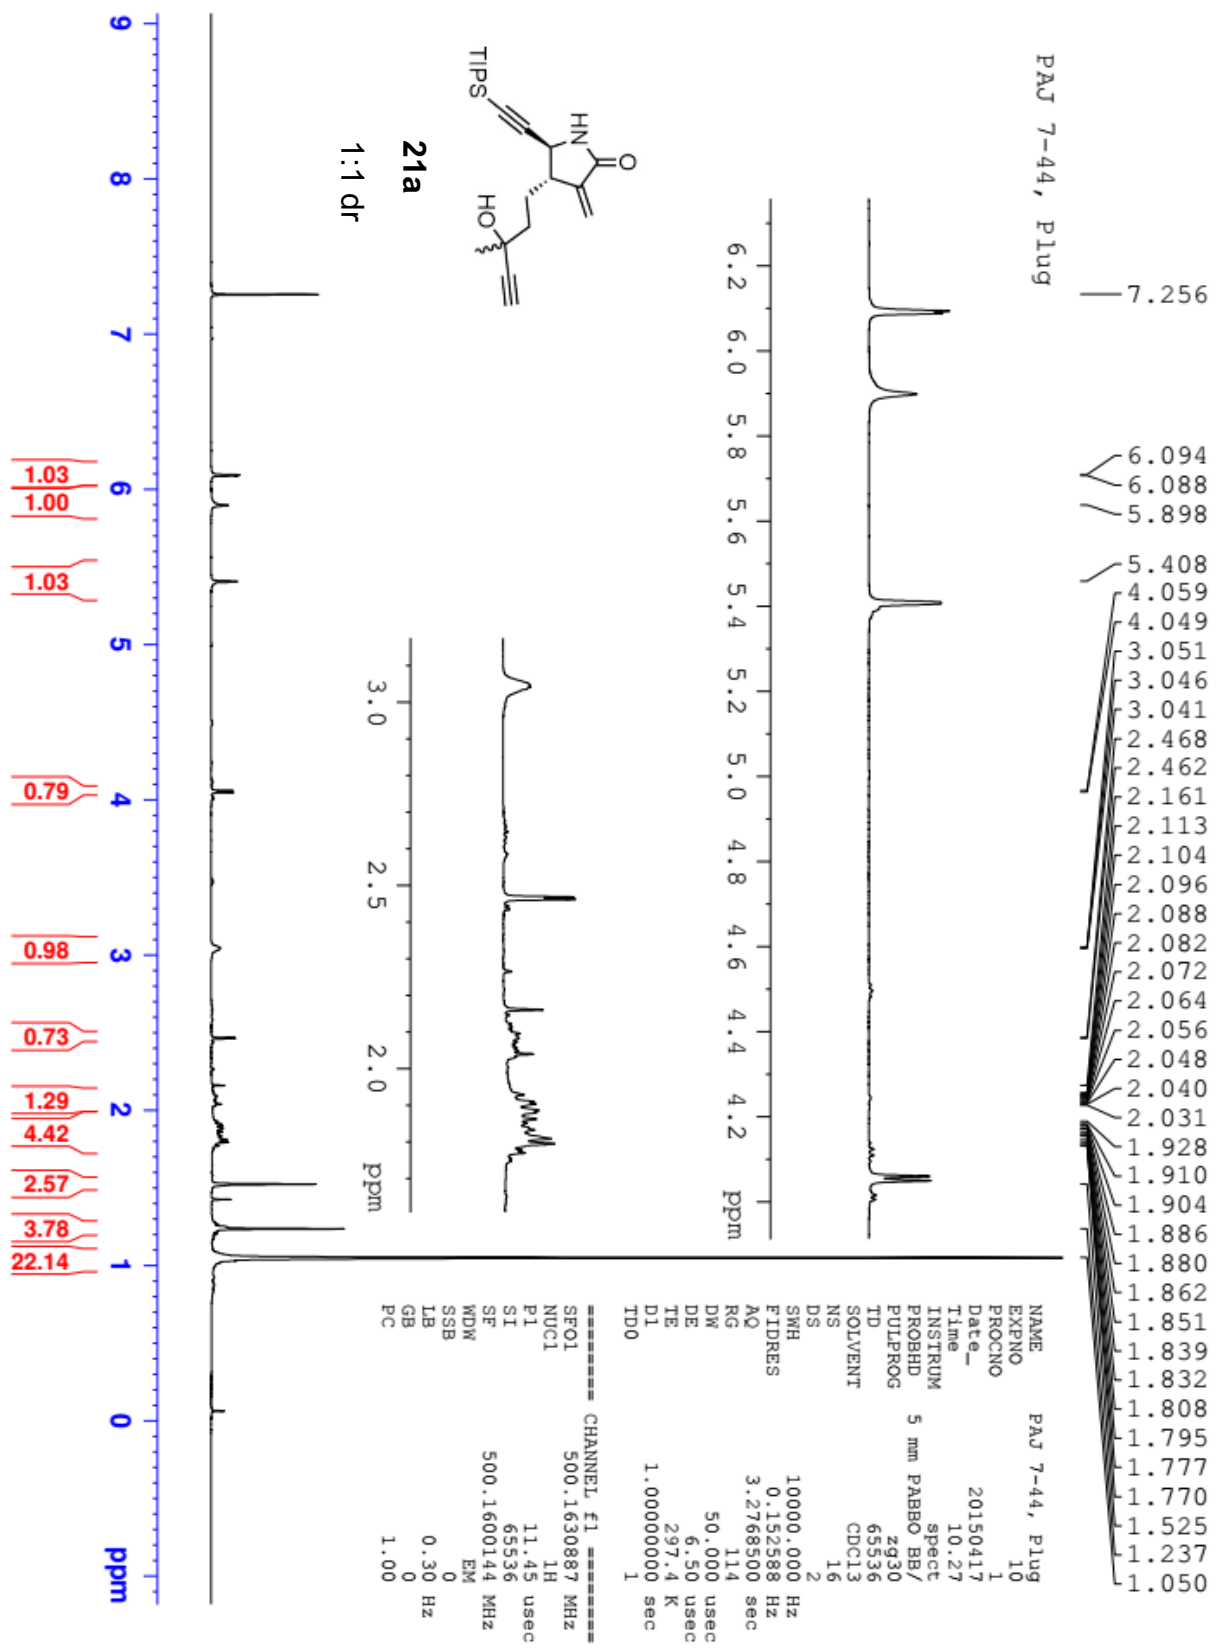

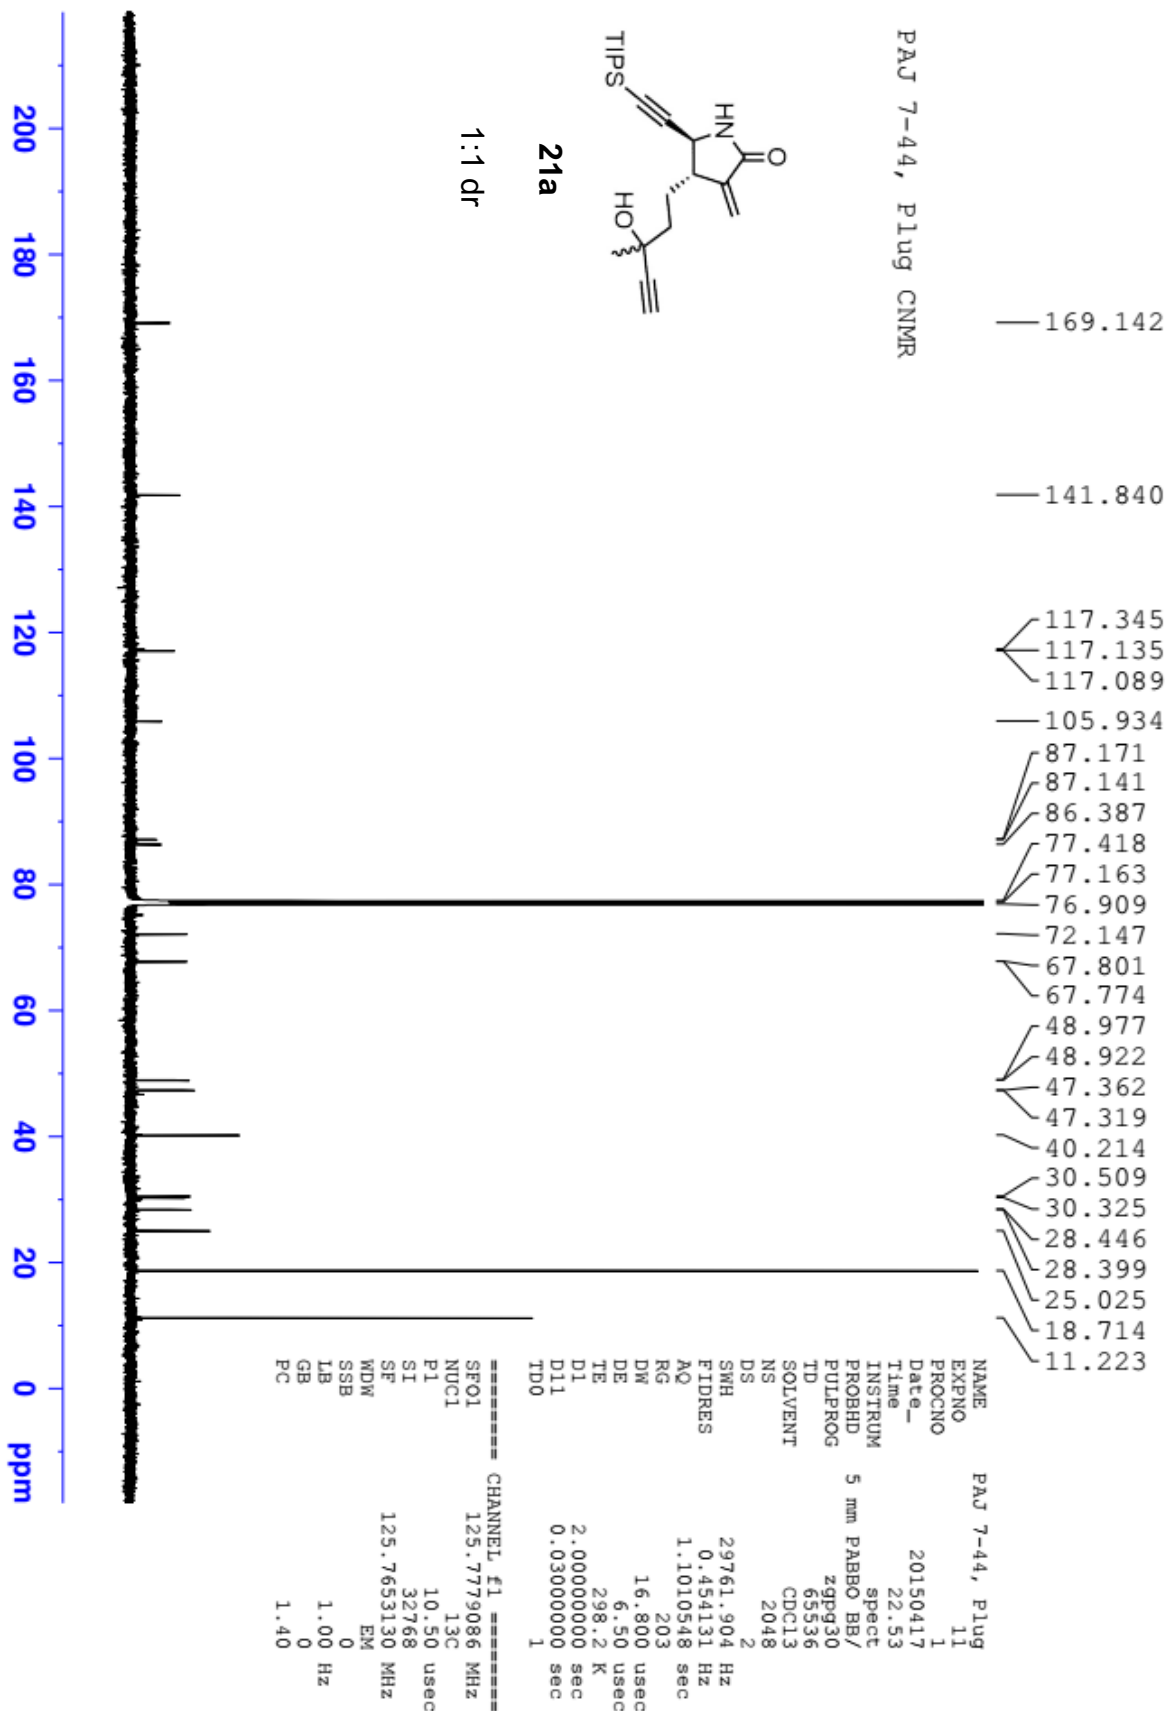

7.255  
6.522  
6.509  
6.059  
6.054  
5.386  
5.382  
4.498  
4.483  
4.465  
4.051  
4.038  
3.043  
3.036  
3.029  
3.024  
3.017  
3.010  
3.002  
2.560  
2.557  
2.446  
2.440  
2.422  
2.415  
2.044  
2.031  
2.023  
2.016  
2.002  
1.988  
1.978  
1.974  
1.952  
1.890  
1.883  
1.877  
1.862  
1.857  
1.850  
1.844  
1.835  
1.830  
1.817  
1.792  
1.784  
1.778  
1.765  
1.753  
1.746  
1.498  
1.492  
1.030  
1.023  
1.019

PAJ 8-34, 4

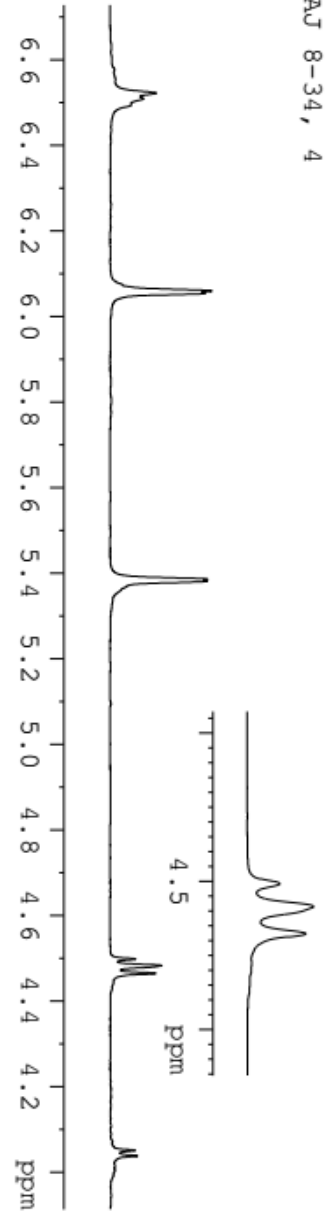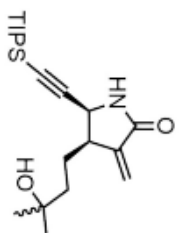

1.8:1 cis:trans

1:1 dr  
3.0 2.8 2.6 2.4 2.2 2.0 ppm 1.50 ppm

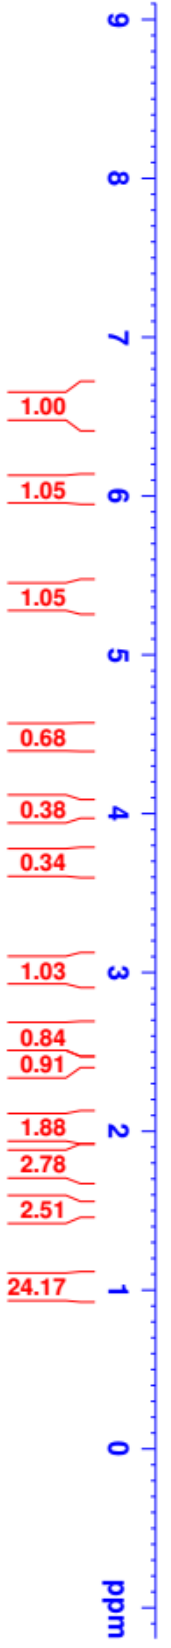

```

NAME          PAJ 8-34, 4
EXPNO         10
PROCNO        1
Date_         20151027
Time         15.21
INSTRUM       5 mm PABBO BB-
PROBHD        zg30
PULPROG       65536
TD            65536
SOLVENT       CDCl3
NS            16
DS            2
SWH           8012.820 Hz
FIDRES        0.122266 Hz
AQ            4.08934966 sec
RG            32
DW            62.400 usec
DE            6.50 usec
TE            97.2 K
D1            1.00000000 sec
TD0           1

===== CHANNEL f1 =====
SFO1          400.1324710 MHz
NUC1          1H
P1            13.75 usec
SI            65536
SF            400.1300115 MHz
WDW           EM
SSB           0
LB            0.30 Hz
GB            0
PC            1.00
  
```

170.35  
 170.23  
 169.45  
 142.00  
 141.83  
 117.16  
 117.02  
 116.92  
 105.99  
 103.19  
 103.02  
 88.65  
 88.50  
 87.66  
 87.32  
 86.15  
 77.47  
 77.16  
 76.84  
 72.02  
 71.95  
 71.70  
 67.89  
 67.66  
 67.60  
 49.03  
 47.98  
 47.93  
 47.28  
 42.82  
 42.67  
 40.41  
 40.19  
 30.24  
 29.97  
 25.18  
 25.04  
 24.95  
 18.70  
 18.67  
 11.16

PAJ 8-34, 4 CNMR2

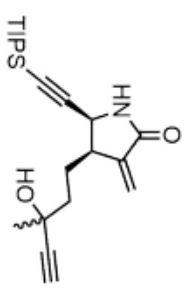

21b

1.8:1 cis:trans

1:1 dr

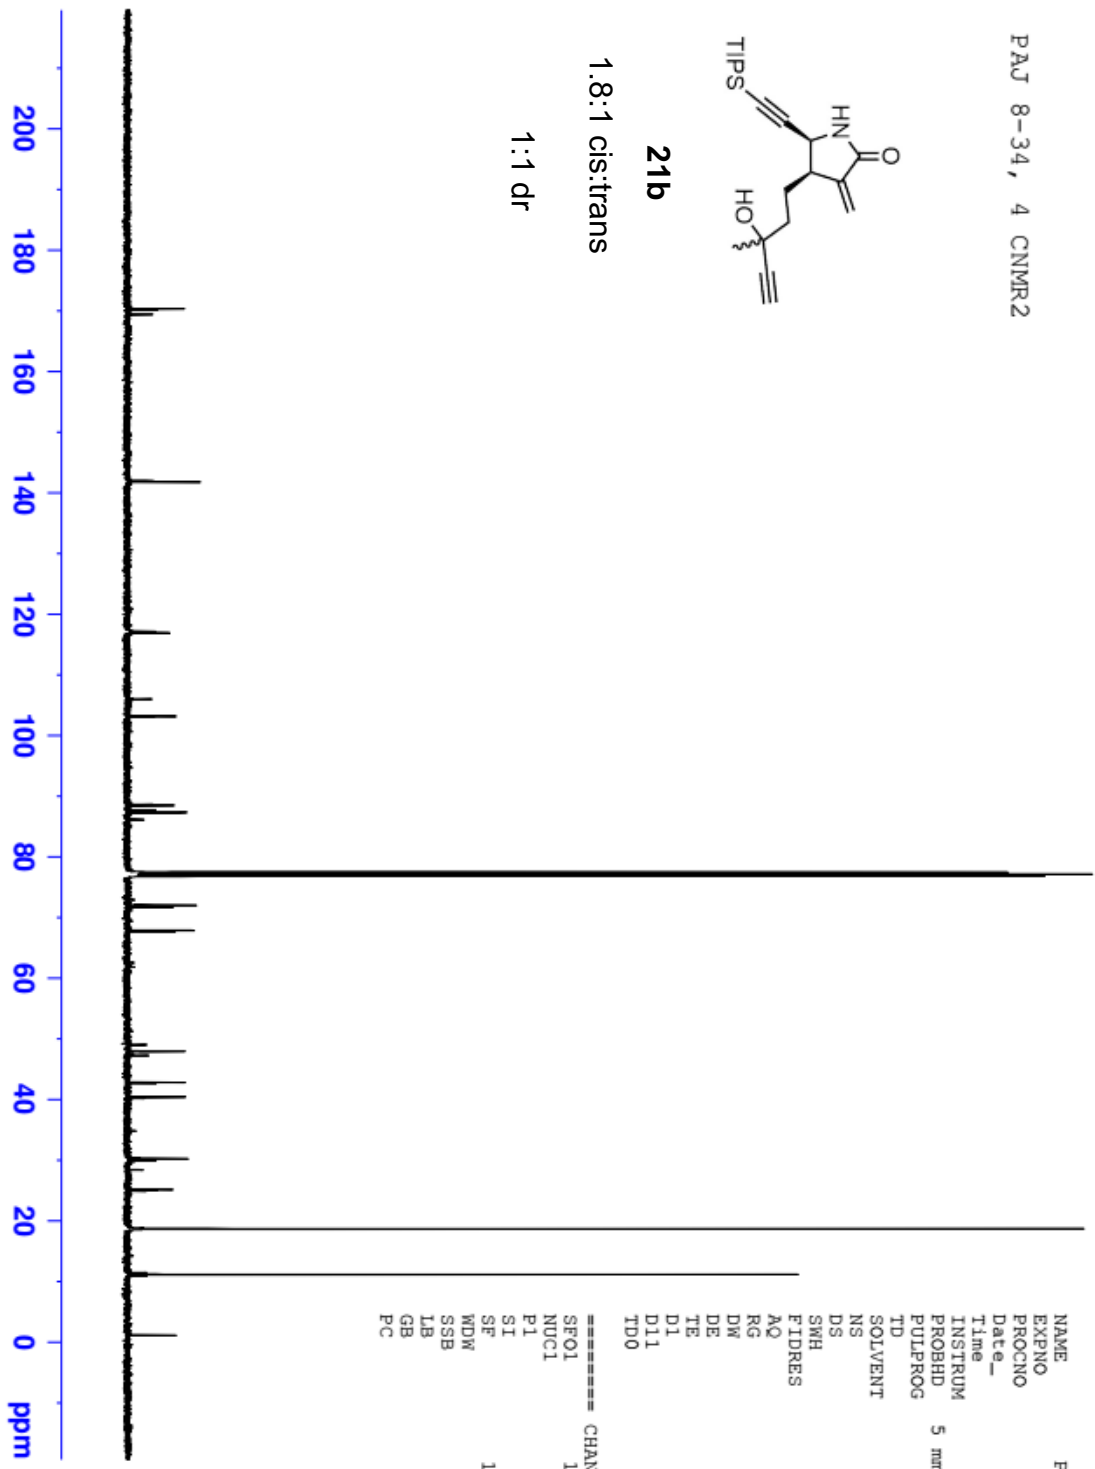

NAME PAJ 8-34, 4  
 EXPNO 20  
 PROCNO 1  
 Date\_ 20151028  
 Time 0.32  
 INSTRUM spect  
 PROBHD 5 mm PABBO BB-  
 PULPROG zgpg30  
 TD 65536  
 SOLVENT CDCl3  
 NS 1024  
 DS 4  
 SWH 24038.461 Hz  
 FIDRES 0.366798 Hz  
 AQ 1.3631988 sec  
 RG 203  
 DW 20.800 usec  
 DE 6.50 usec  
 TE 97.1 K  
 D1 2.00000000 sec  
 D11 0.03000000 sec  
 TD0 1

==== CHANNEL f1 =====  
 SF01 100.6228293 MHz  
 NUC1 13C  
 P1 10.00 usec  
 SI 32768  
 SF 100.6127574 MHz  
 WDW EM  
 SSB 0  
 LB 1.00 Hz  
 GB 0  
 PC 1.40



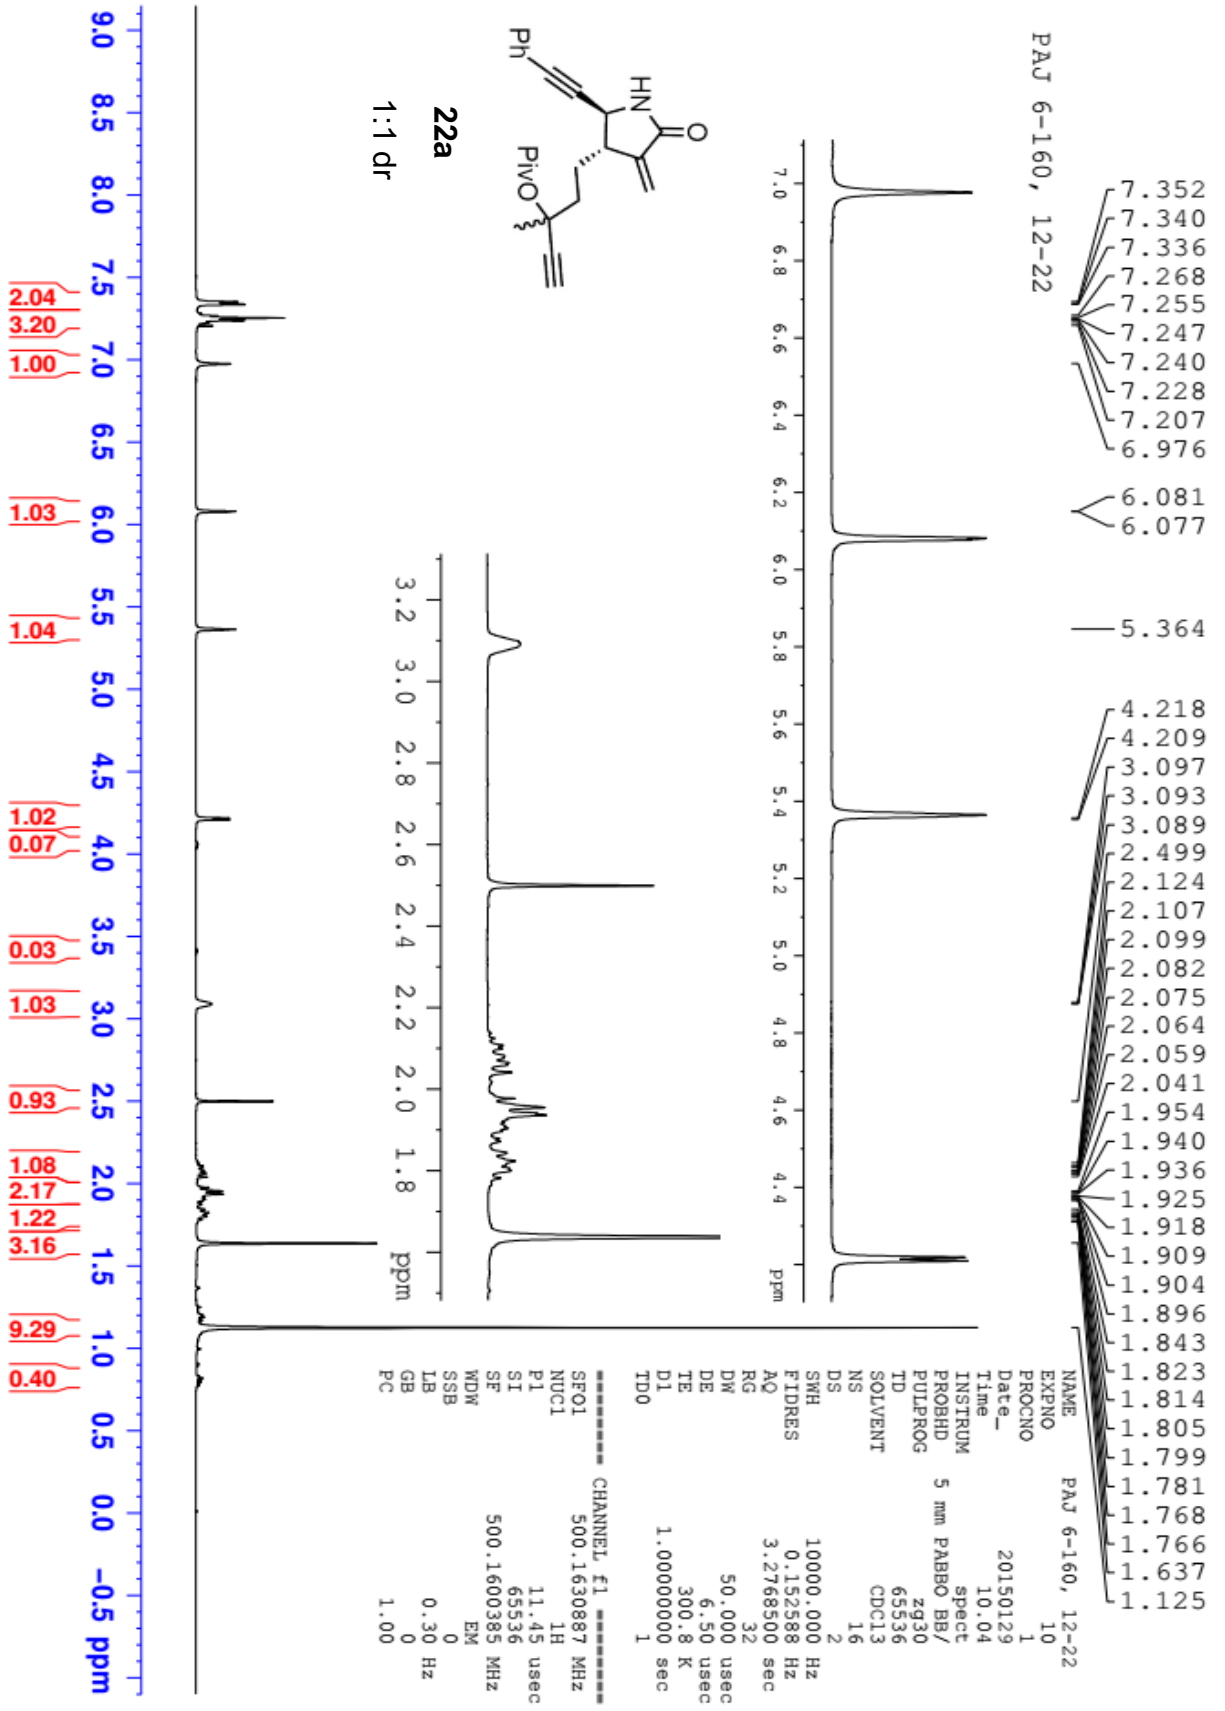

PAJ 6-160, 12-22 CNMR

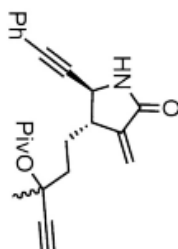

**22a**

1:1 dr

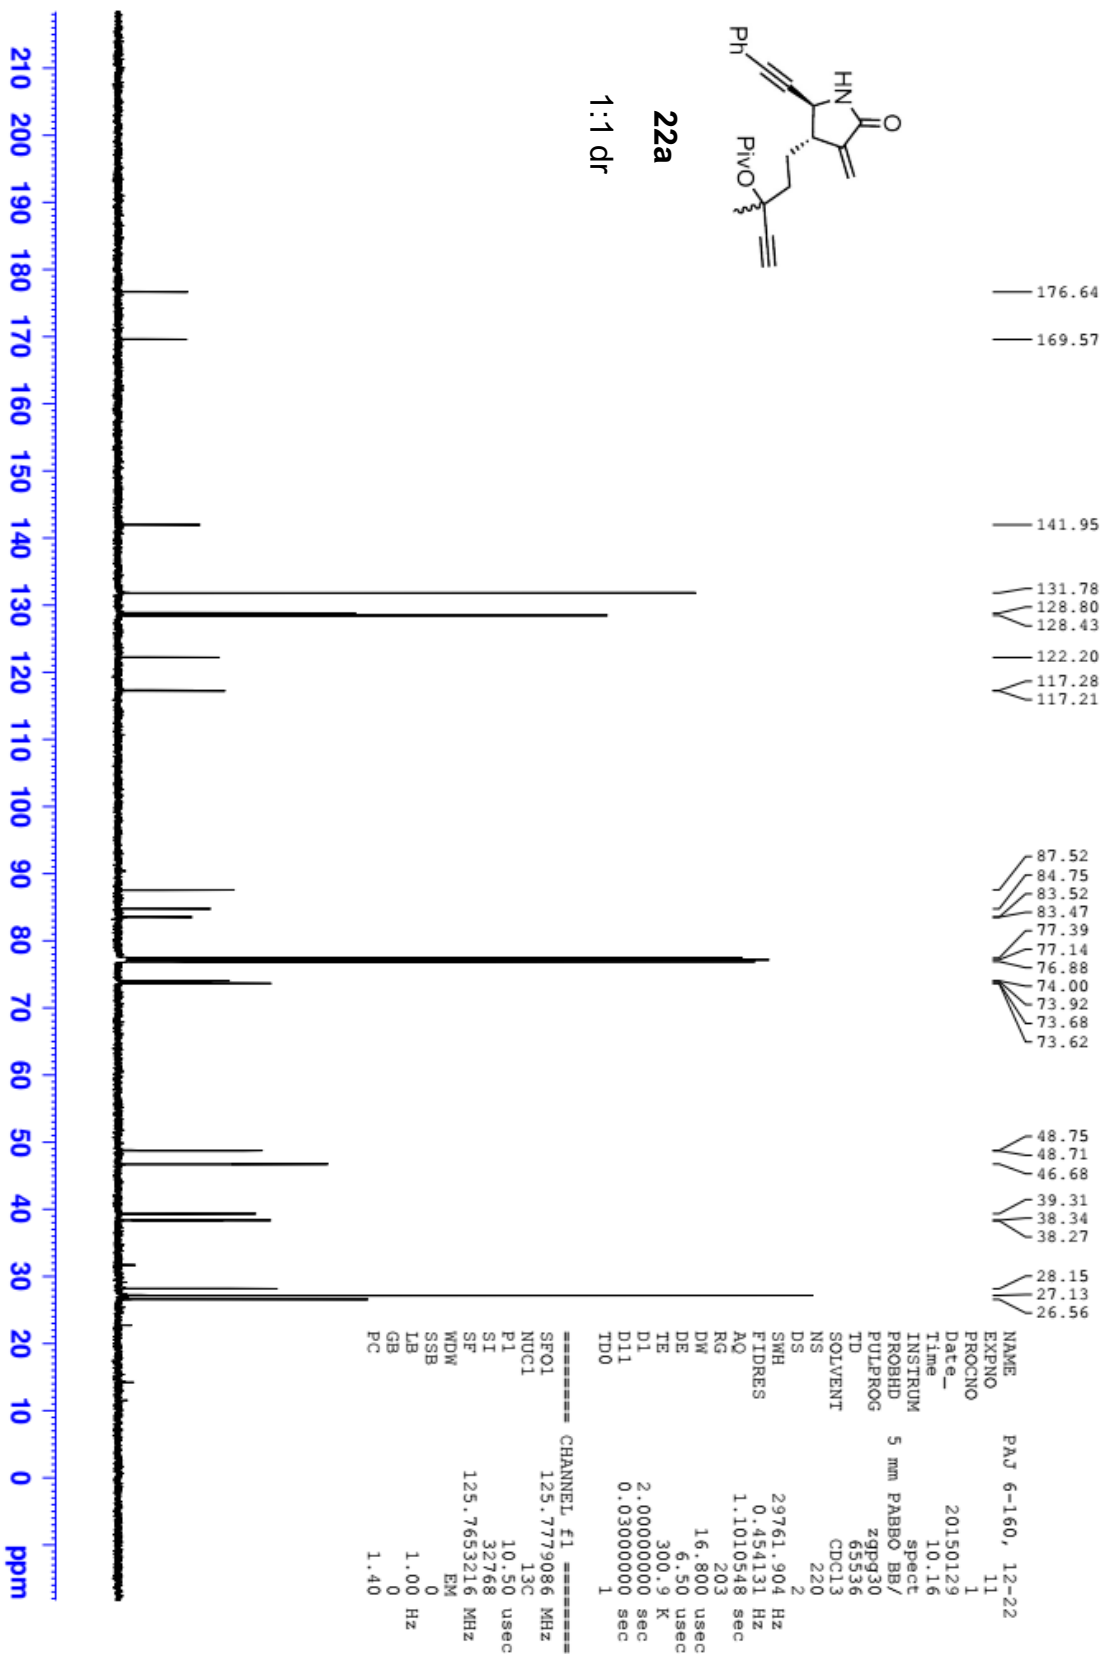

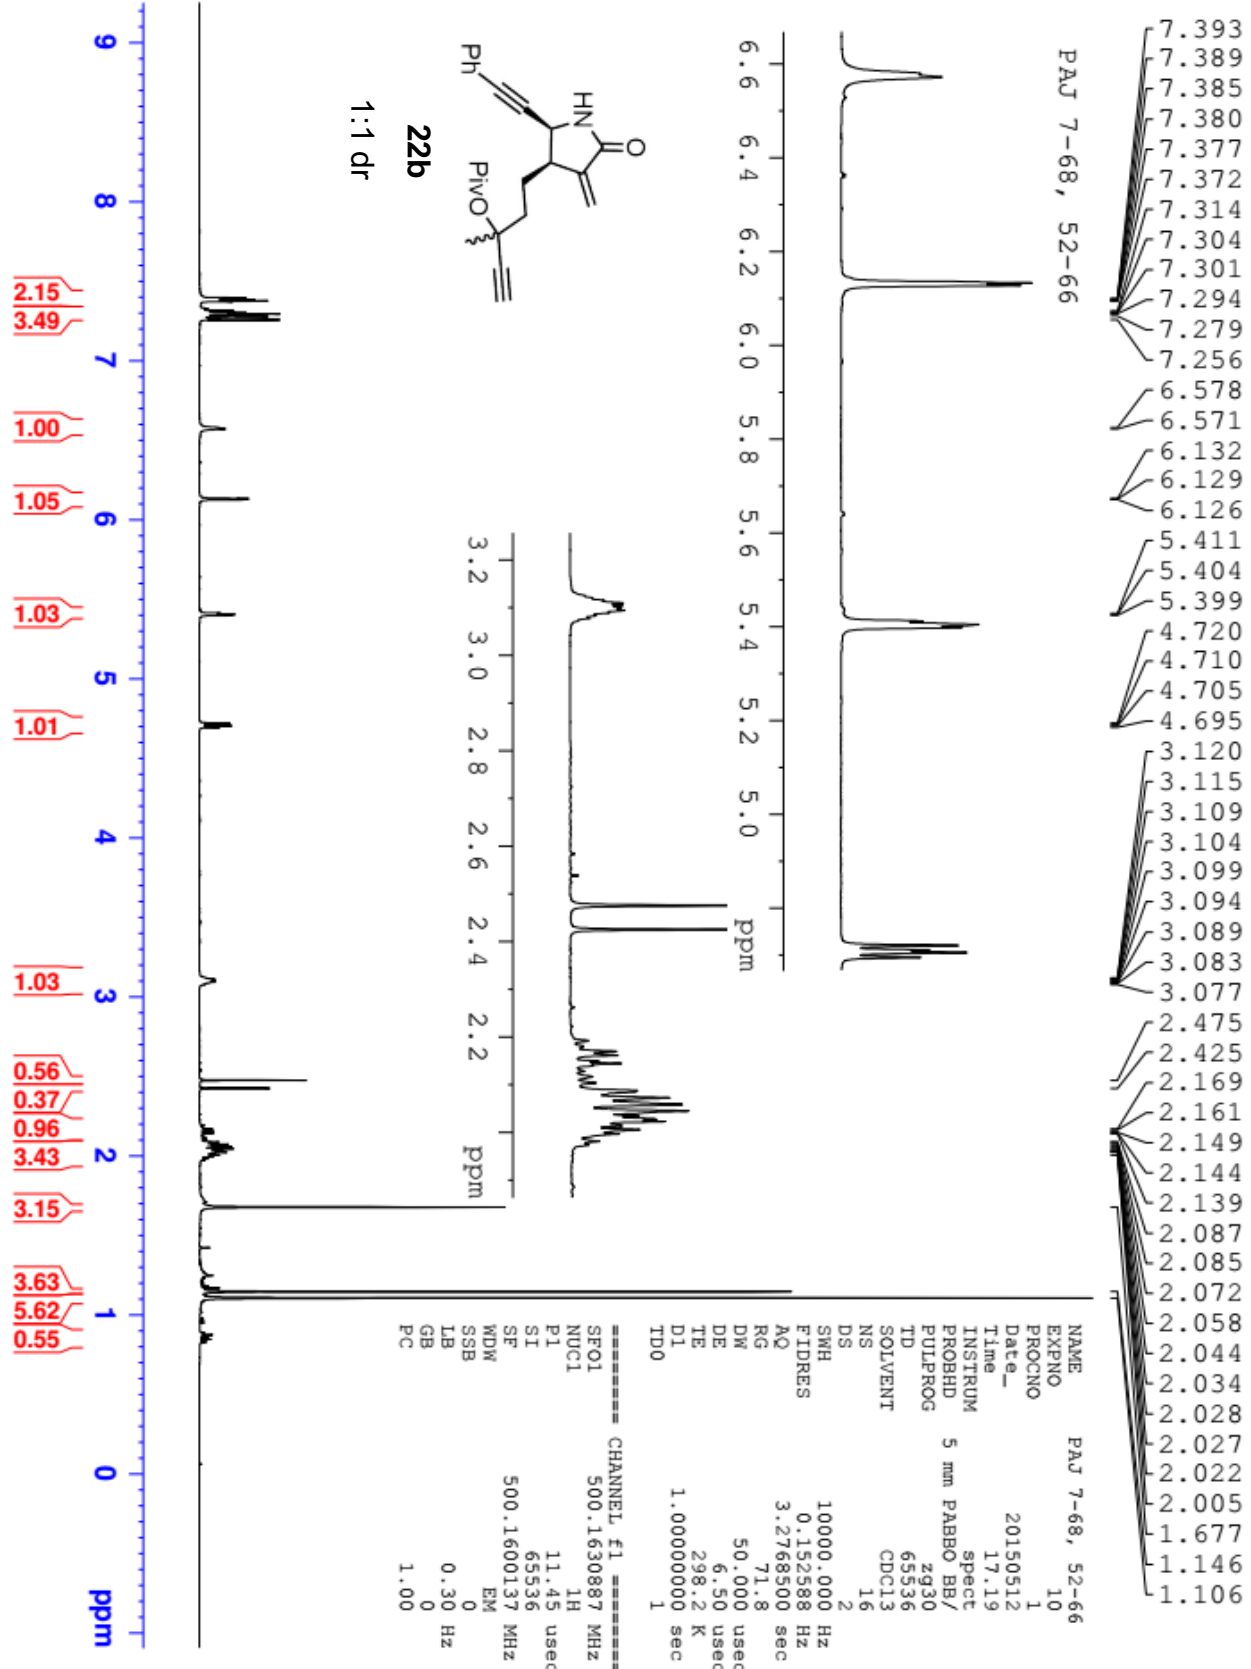

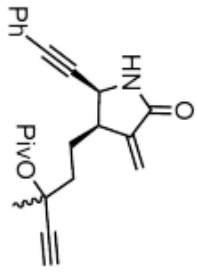

**22b**

1:1 dr

PAJ 7-68, 52-66 CNMR

176.712  
170.204  
170.152

141.802  
141.749  
131.910  
131.887  
128.890  
128.442  
122.202  
122.179  
117.148

87.033  
86.989  
84.893  
84.848  
83.839  
83.528  
77.415  
77.160  
76.906

74.198  
73.852  
73.687  
73.463  
47.781  
42.700  
42.679

39.324  
39.297  
39.058  
39.035  
27.140  
27.101  
26.731  
26.640  
24.988  
24.788

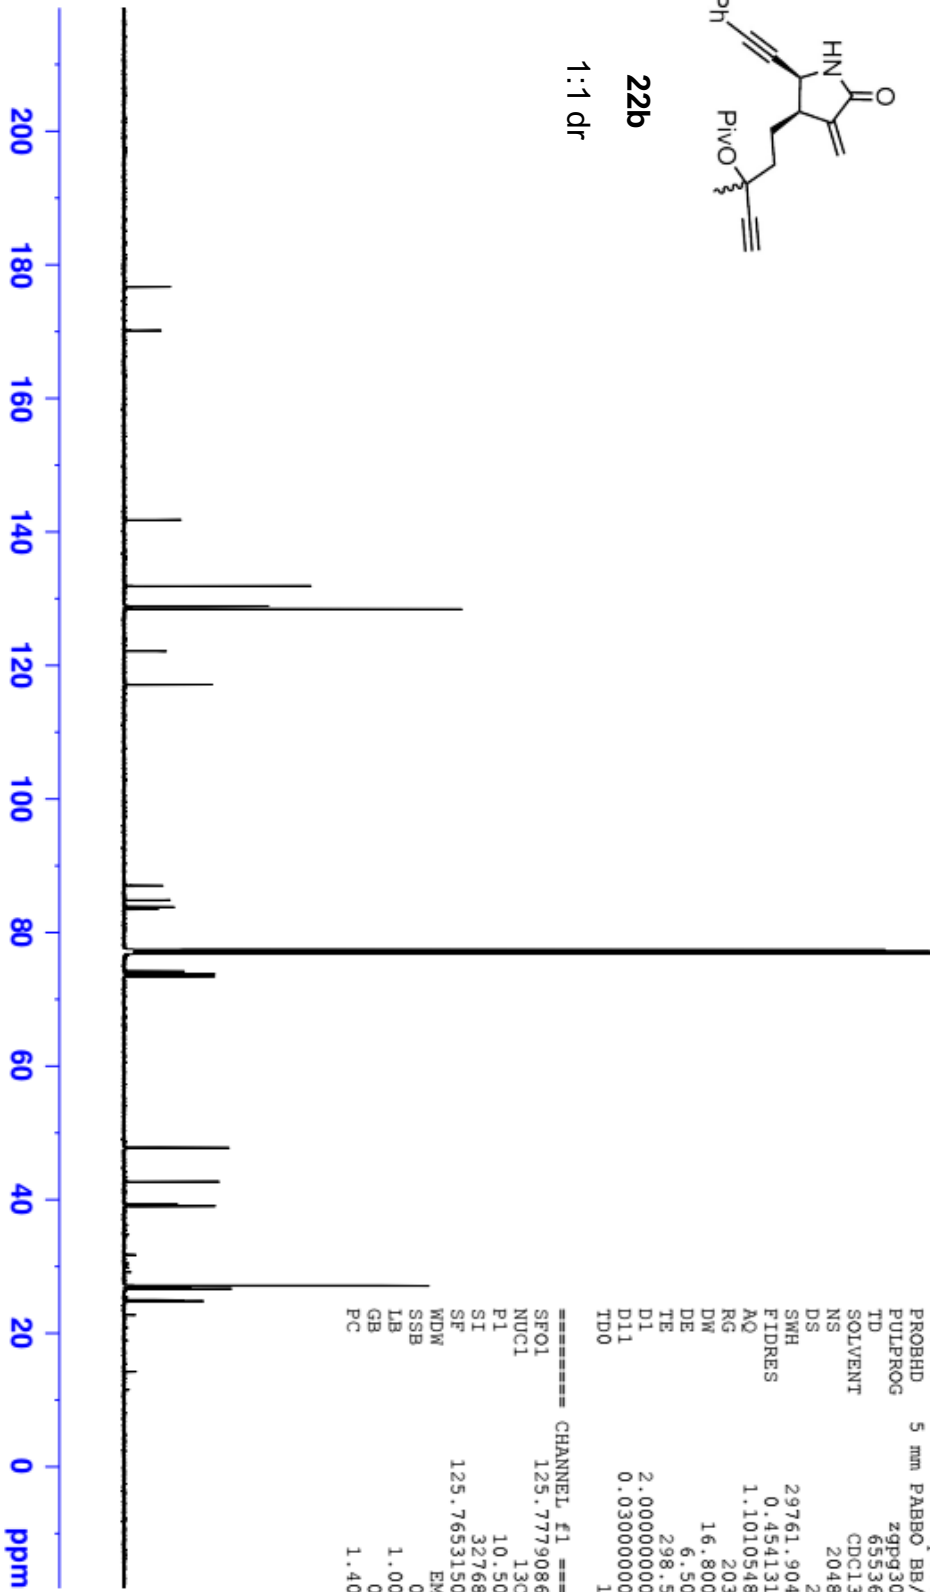

```

NAME PAJ 7-68, 52-66
EXPNO 11
PROCNO 1
Date_ 20150513
Time 4.52
INSTRUM spect
PROBHD 5 mm PABBO BB/
PULPROG zgpg30
TD 65536
SOLVENT CDCl3
NS 2048
DS 2
SWH 29761.904 Hz
FIDRES 0.454131 Hz
AQ 1.1010548 sec
RG 203
DE 16.800 usec
TE 298.5 K
D1 2.00000000 sec
D11 0.03000000 sec
TD0 1

===== CHANNEL f1 =====
SFO1 125.7779086 MHz
NUC1 13C
P1 10.50 usec
SI 32768
SF 125.7653150 MHz
WDW EM
SSB 0
LB 1.00 Hz
GB 0
PC 1.40
  
```

PAJ 7-50, 1-5

- 7.252
- 6.489
- 6.086
- 6.079
- 5.382
- 5.376
- 5.371
- 5.365
- 4.056
- 4.049
- 4.043
- 4.036
- 3.470
- 3.452
- 3.047
- 3.040
- 3.034
- 3.026
- 3.020
- 3.013
- 2.532
- 2.527
- 2.154
- 2.144
- 2.123
- 2.112
- 2.062
- 2.053
- 2.044
- 2.029
- 2.021
- 2.006
- 1.995
- 1.982
- 1.973
- 1.939
- 1.908
- 1.900
- 1.876
- 1.868
- 1.820
- 1.810
- 1.800
- 1.788
- 1.779
- 1.767
- 1.758
- 1.670

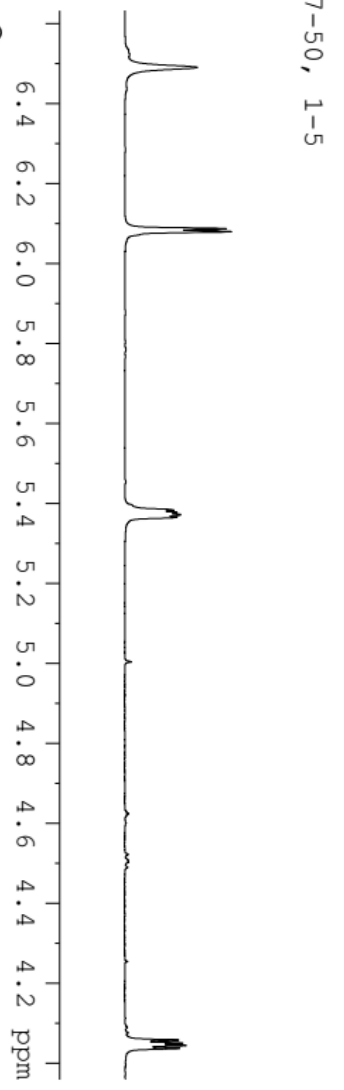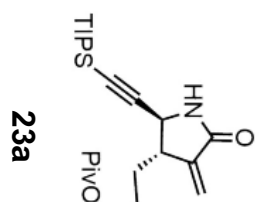

1:1 dr  
3.2 3.0 2.8 2.6 2.4 2.2 2.0 ppm

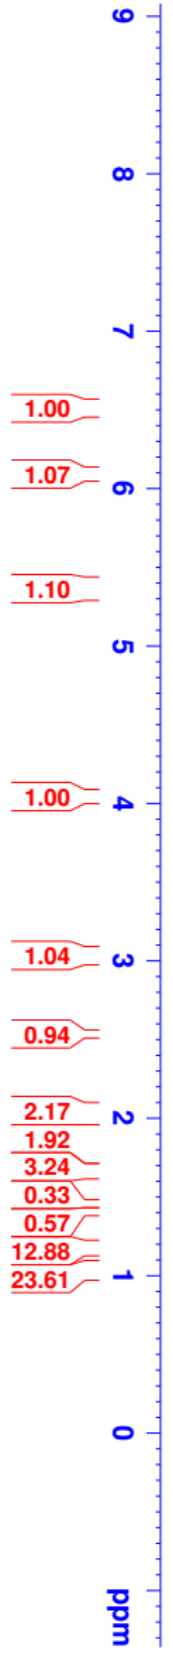

```

NAME          PAJ 7-50, 1-5
EXPNO         10
PROCNO        1
Date_         20150505
Time_         17.36
INSTRUM       5 mm PABBO BB-
PROBHD        zg30
PULPROG       65536
TD            65536
SOLVENT       CDCl3
NS            16
DS            2
SWH           8223.685 Hz
FIDRES        0.125483 Hz
AQ            3.9846387 sec
RG            32
DW            60.800 usec
DE            6.50 usec
TE            91.3 K
D1            1.00000000 sec

===== CHANNEL f1 =====
NUC1          1H
P1            13.75 usec
SI            65536
SF            400.1300132 MHz
WDW           EM
SSB           0
LB            0.30 Hz
GB            0
PC            1.00
  
```

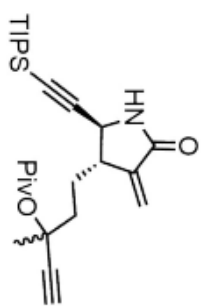

**23a**

1:1 dr

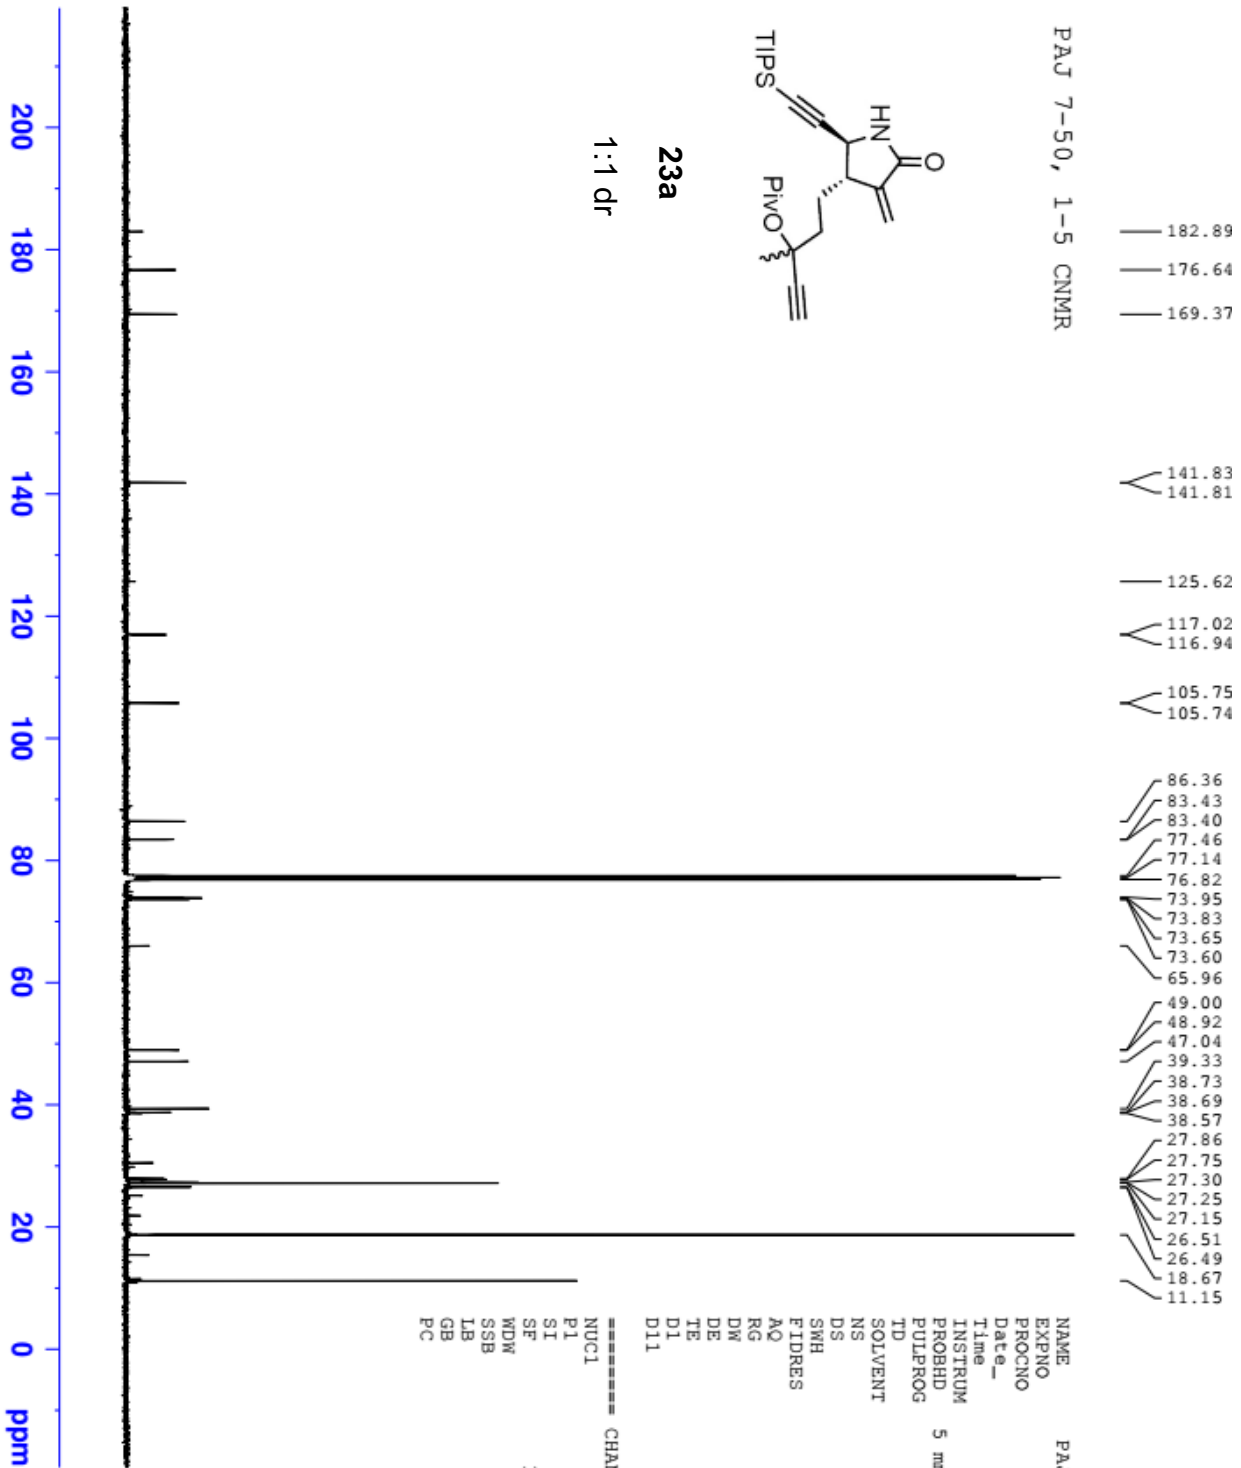

```

NAME          PAJ 7-50, 1-5
EXPNO         11
PROCNO        1
Date_         20150506
Time         3.14
INSTRUM       5 mm PABBO BB-
PROBHD        spect
PULPROG       zgpg30
TD            65536
SOLVENT       CDCl3
NS           2048
DS           4
SWH          24038.461 Hz
FIDRES       0.366798 Hz
AQ          1.3631988 sec
RG           203
DW          20.800 usec
DE          6.50 usec
TE          95.5 K
D1          2.00000000 sec
D11         0.03000000 sec

===== CHANNEL f1 =====
NUC1         13C
P1          10.00 usec
SI          32768
SF          100.6127580 MHz
WDW          EM
SSB          0
LB          1.00 Hz
GB          0
PC          1.40
  
```

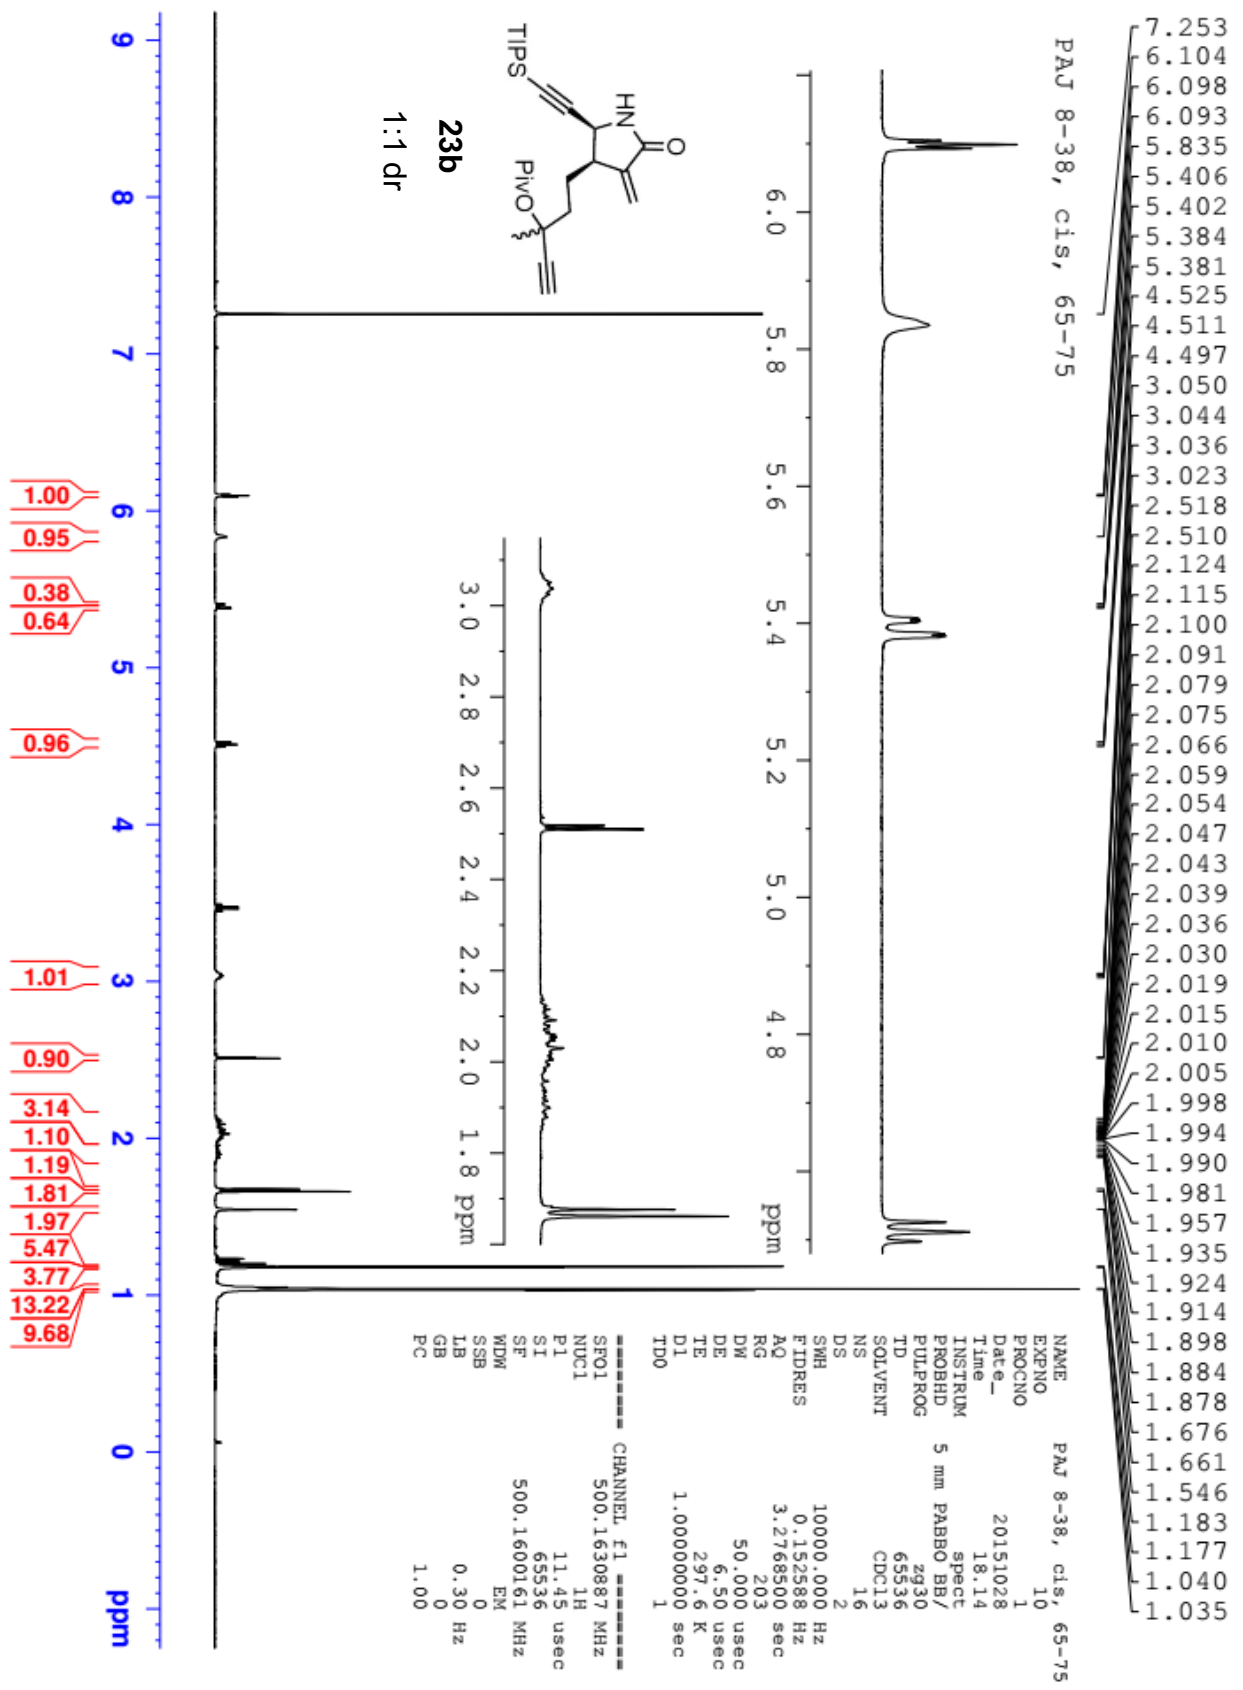

- 176.744
- 169.848
- 169.766
- 141.647
- 141.610
- 117.276
- 117.222
- 103.044
- 102.992
- 88.956
- 88.877
- 83.907
- 83.358
- 77.413
- 77.159
- 76.905
- 74.323
- 73.883
- 73.853
- 73.436
- 47.863
- 42.813
- 42.634
- 39.363
- 39.347
- 39.008
- 38.780
- 27.199
- 27.188
- 26.623
- 26.349
- 24.967

PAJ 8-38, 65-75 Cis CNMR

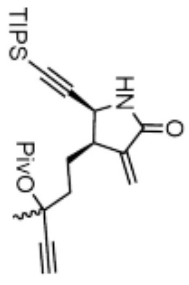

23b

1:1 dr

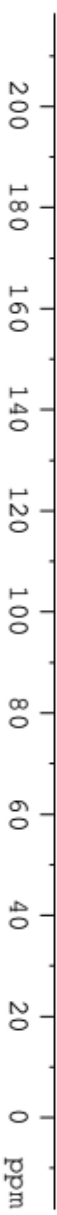

```

NAME          PAJ 8-38, 65-75 Cis
EXPNO         10
PROCNO        1
Date_         20151107
Time          4.07
INSTRUM       spect
PROBHD        5 mm PABBO BB/
PULPROG       zgpg30
TD            65536
SOLVENT       CDC13
NS            3000
DS            2
SWH           29761.904 Hz
FIDRES        0.454131 Hz
AQ            1.1010548 sec
RG            203
DW            16.800 usec
DE            6.50 usec
TE            298.5 K
D1            2.00000000 sec
D11           0.03000000 sec
TD0           1

===== CHANNEL f1 =====
SFO1          125.7779086 MHz
NUC1          13C
P1            10.50 usec
SI            32768
SF            125.7653129 MHz
WDW           EM
SSB           0
LB            1.00 Hz
GB            0
PC            1.40
  
```



PAJ 7-82, 17-20

|         |                 |
|---------|-----------------|
| NAME    | PAJ 7-82, 17-20 |
| EXPNO   | 10              |
| PROCNO  | 1               |
| Date_   | 20150518        |
| Time    | 14.22           |
| INSTRUM | spect           |
| PROBHD  | 5 mm PABBO BB-  |
| PULPROG | zg30            |
| TD      | 65536           |
| SOLVENT | CDCl3           |
| NS      | 16              |
| DS      | 2               |
| SWH     | 8223.685 Hz     |
| FIDRES  | 0.125483 Hz     |
| AQ      | 3.9846387 sec   |
| RG      | 71.8            |
| DW      | 60.800 usec     |
| DE      | 6.50 usec       |
| TE      | 298.3 K         |
| D1      | 1.000000000 sec |

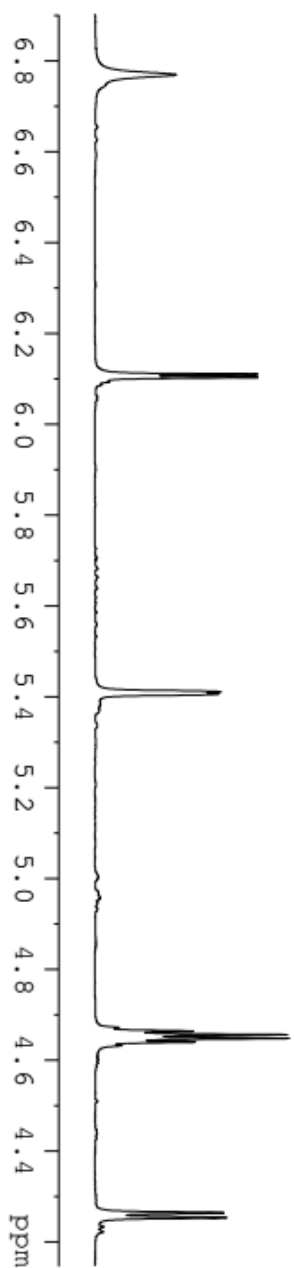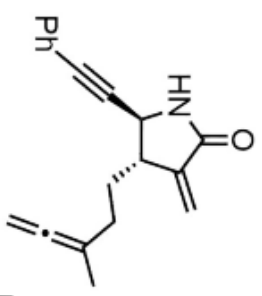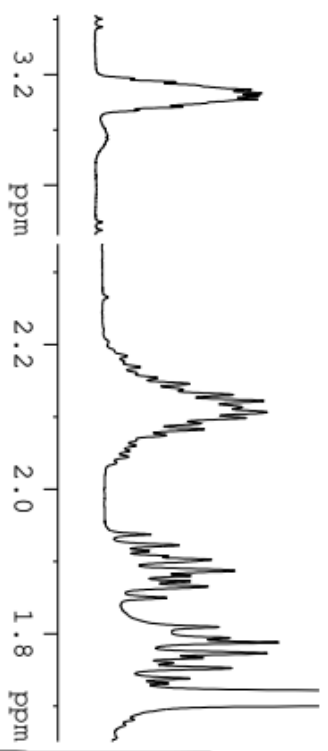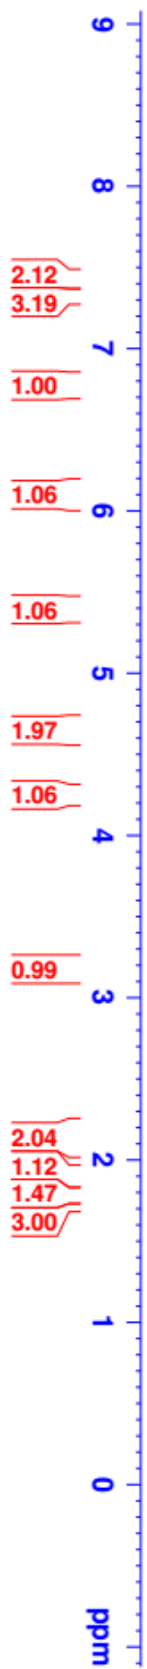

===== CHANNEL f1 =====

|      |                 |
|------|-----------------|
| NUC1 | 1H              |
| P1   | 13.75 usec      |
| SI   | 65536           |
| SF   | 400.1300107 MHz |
| WDW  | EM              |
| SSB  | 0               |
| LB   | 0.30 Hz         |
| GB   | 0               |
| PC   | 1.00            |

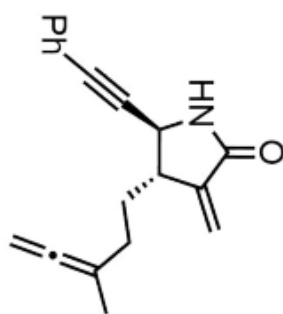

24a

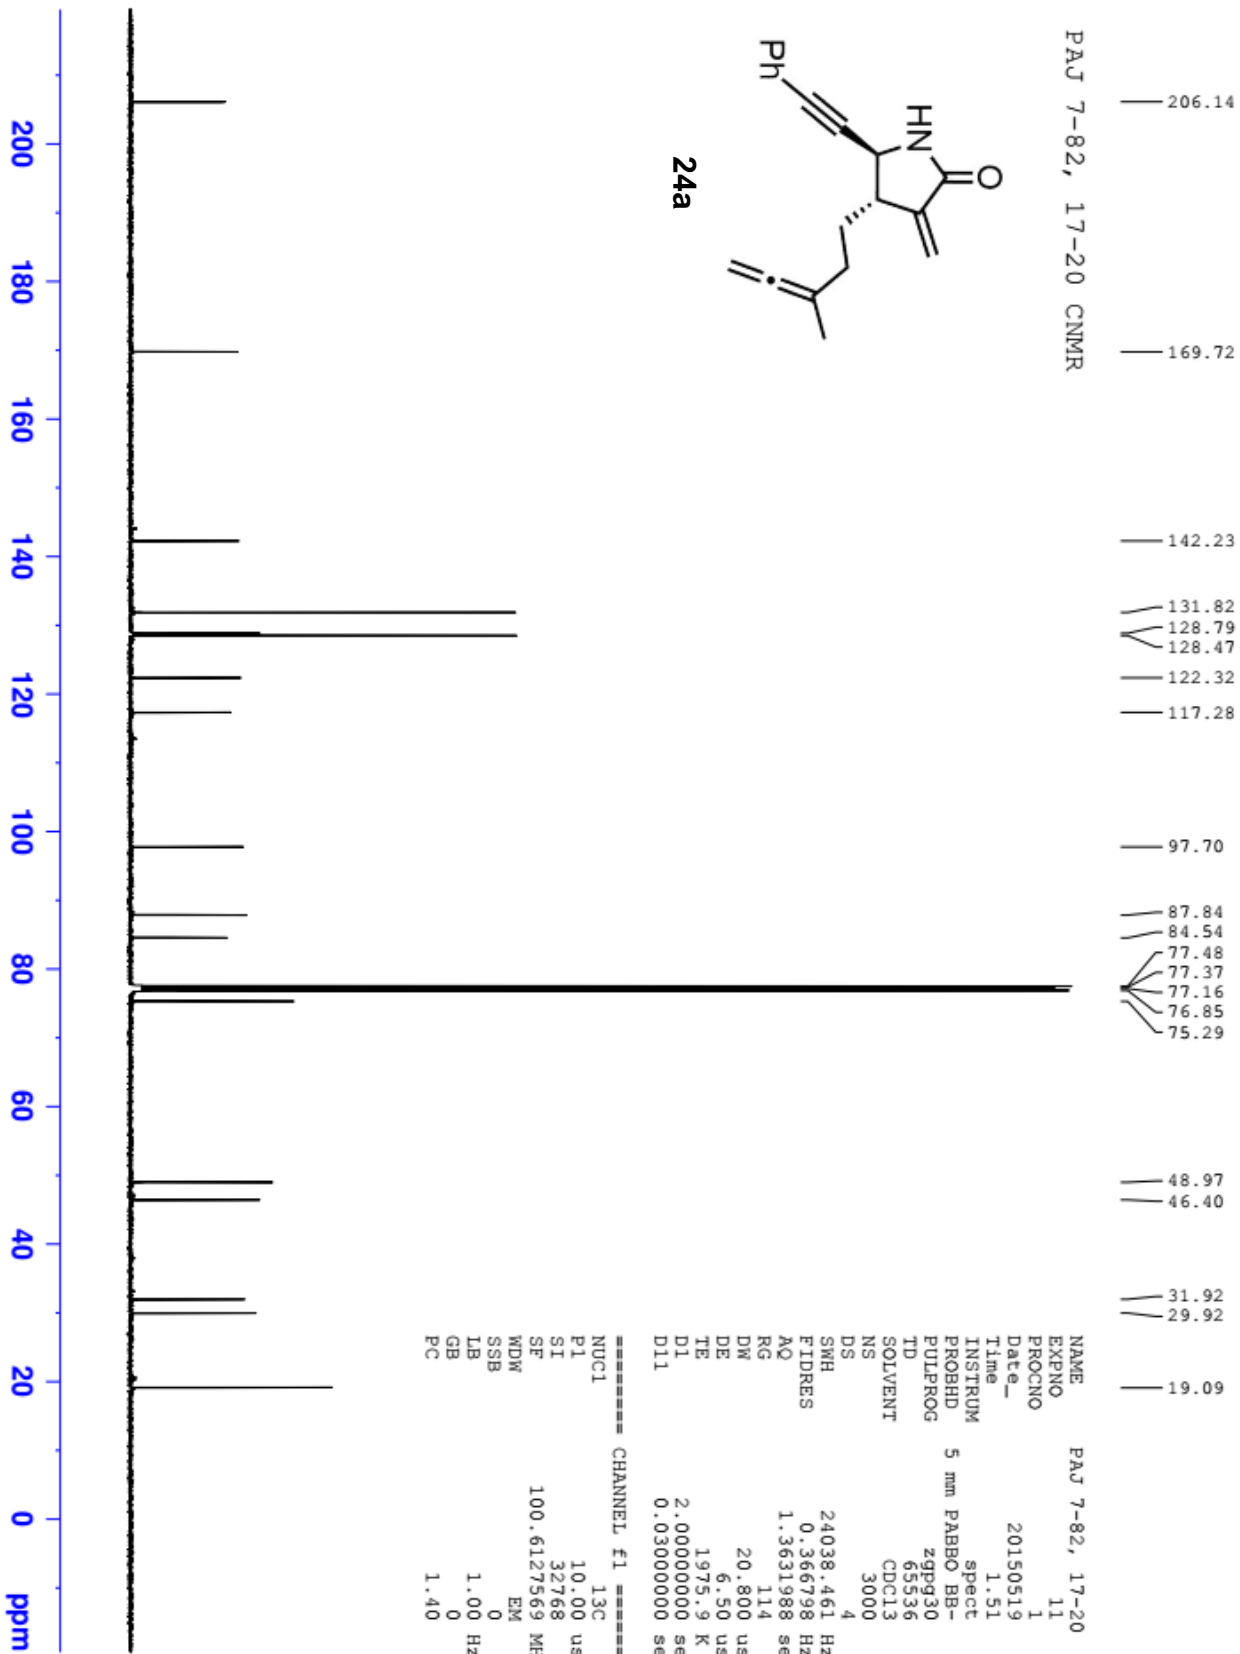

PAJ 7-74, 35-39

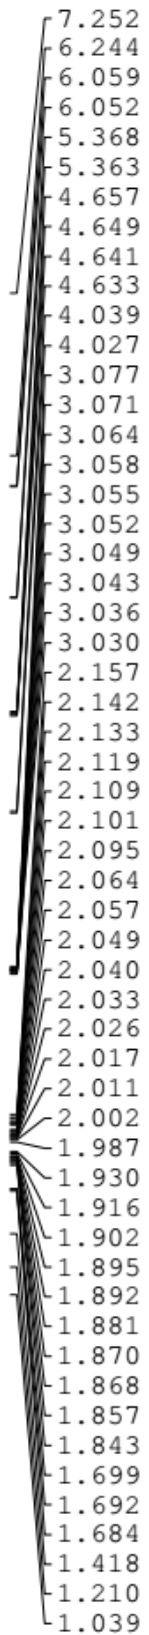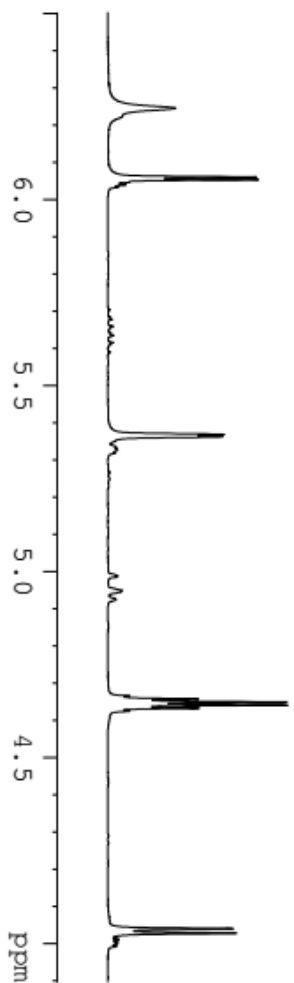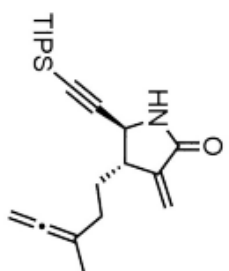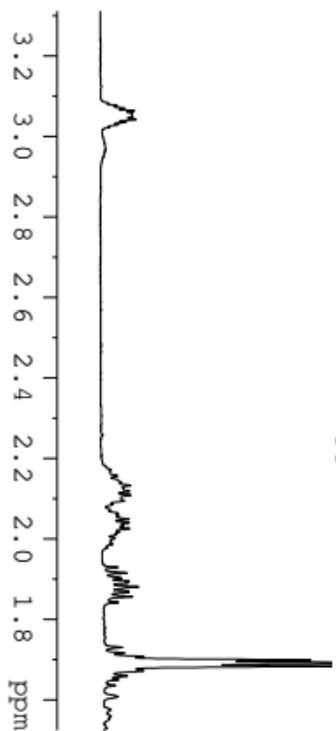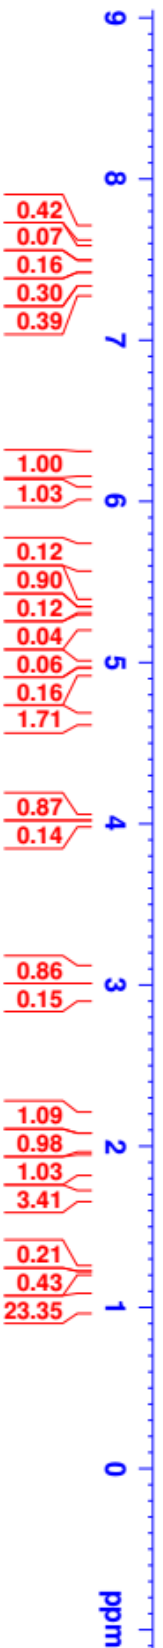

NAME PAJ 7-74, 35-39  
EXPNO 10  
PROCNO 1  
Date\_ 20150512  
Time 14.54  
INSTRUM spect  
PROBHD 5 mm PABBO BB-  
PULPROG zg30  
TD 65536  
SOLVENT CDCl3  
NS 16  
DS 2  
SWH 8223.685 Hz  
FIDRES 0.125483 Hz  
AQ 3.9846387 sec  
RG 57  
DW 60.800 usec  
DE 6.50 usec  
TE 453.3 K  
D1 1.00000000 sec

===== CHANNEL f1 =====  
NUC1 1H  
P1 13.75 usec  
SI 65536  
SF 400.1300128 MHz  
WDW EM  
SSB 0  
LB 0.30 Hz  
GB 0  
PC 1.00

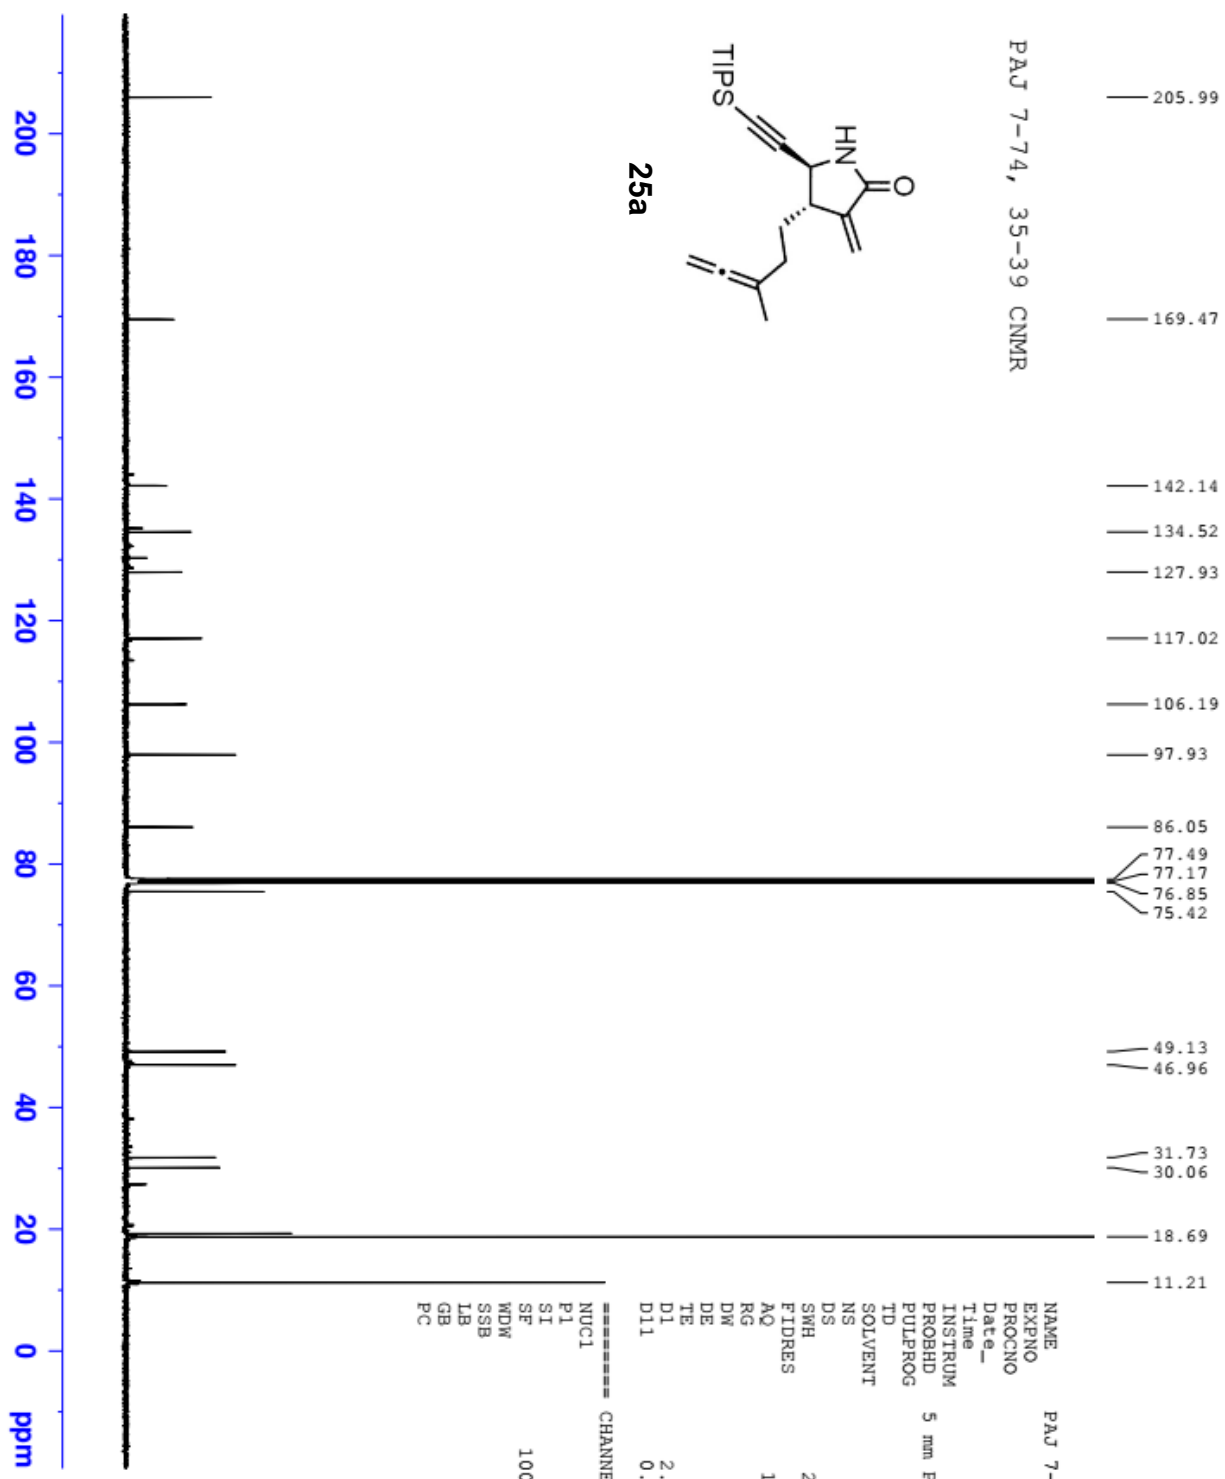

PAJ 7-74, 35-39 CNMR

25a

```

NAME          PAJ 7-74, 35-39
EXPNO         11
PROCNO        1
Date_         20150513
Time_         1.13
INSTRUM       spect
PROBHD        5 mm PABBO BB-
PULPROG       zgpg30
TD            65536
SOLVENT       CDCl3
NS            3056
DS            4
SWH           24038.461 Hz
FIDRES        0.366798 Hz
AQ            1.3631988 sec
RG            203
DW            20.800 usec
DE            6.50 usec
TE            -330.0 K
D1            2.000000000 sec
D11           0.030000000 sec

===== CHANNEL f1 =====
NUC1          13C
P1            10.00 usec
SI            32768
SF            100.6127547 MHz
WDW           EM
SSB           0
LB            1.00 Hz
GB            0
PC            1.40
  
```

PAJ 8-56, 3-5

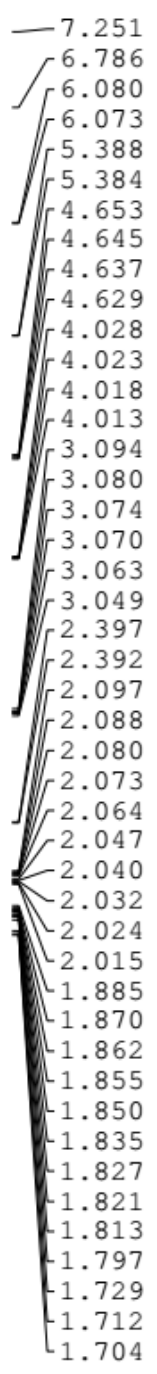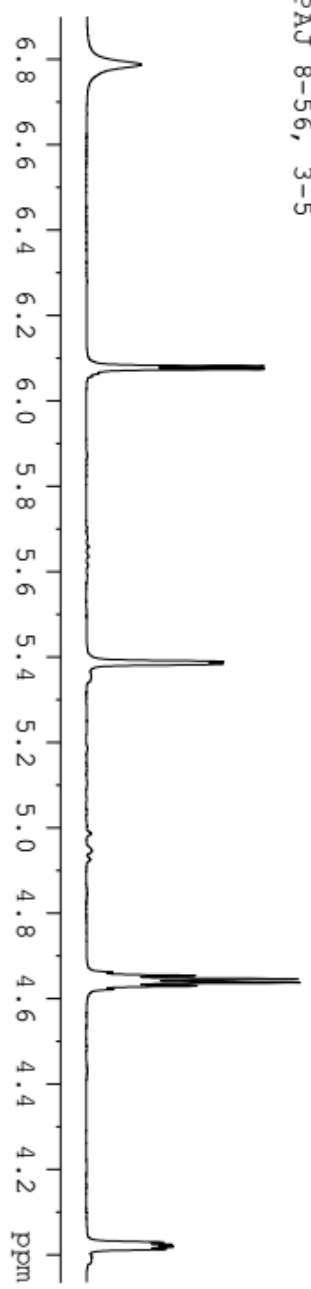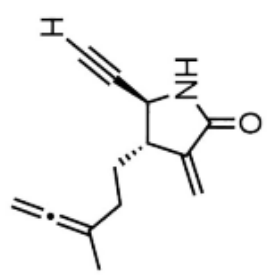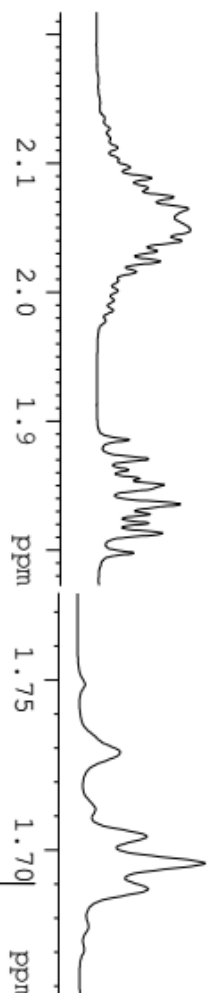

```

NAME          PAJ 8-56, 3-5
EXPNO         10
PROCNO        1
Date_         20151111
Time_         17.54
INSTRUM       5 mm PABBO BB-
PROBHD        spect
PULPROG       zg30
TD            65536
SOLVENT       CDCl3
NS            16
DS            2
SWH           8223.685 Hz
FIDRES        0.125483 Hz
AQ            3.9846387 sec
RG            80.6
DE            60.800 usec
TE            97.7 K
D1            1.00000000 sec

----- CHANNEL f1 -----
NUC1          1H
SI            13.75 usec
SF            400.1300130 MHz
WDW           EM
SSB           0
LB            0.30 Hz
GB            0
PC            1.00
  
```

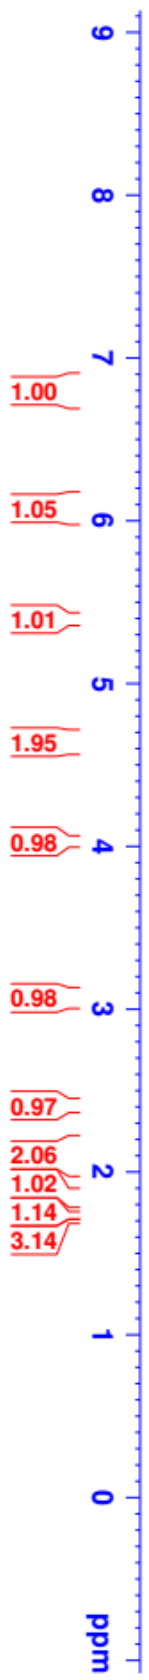

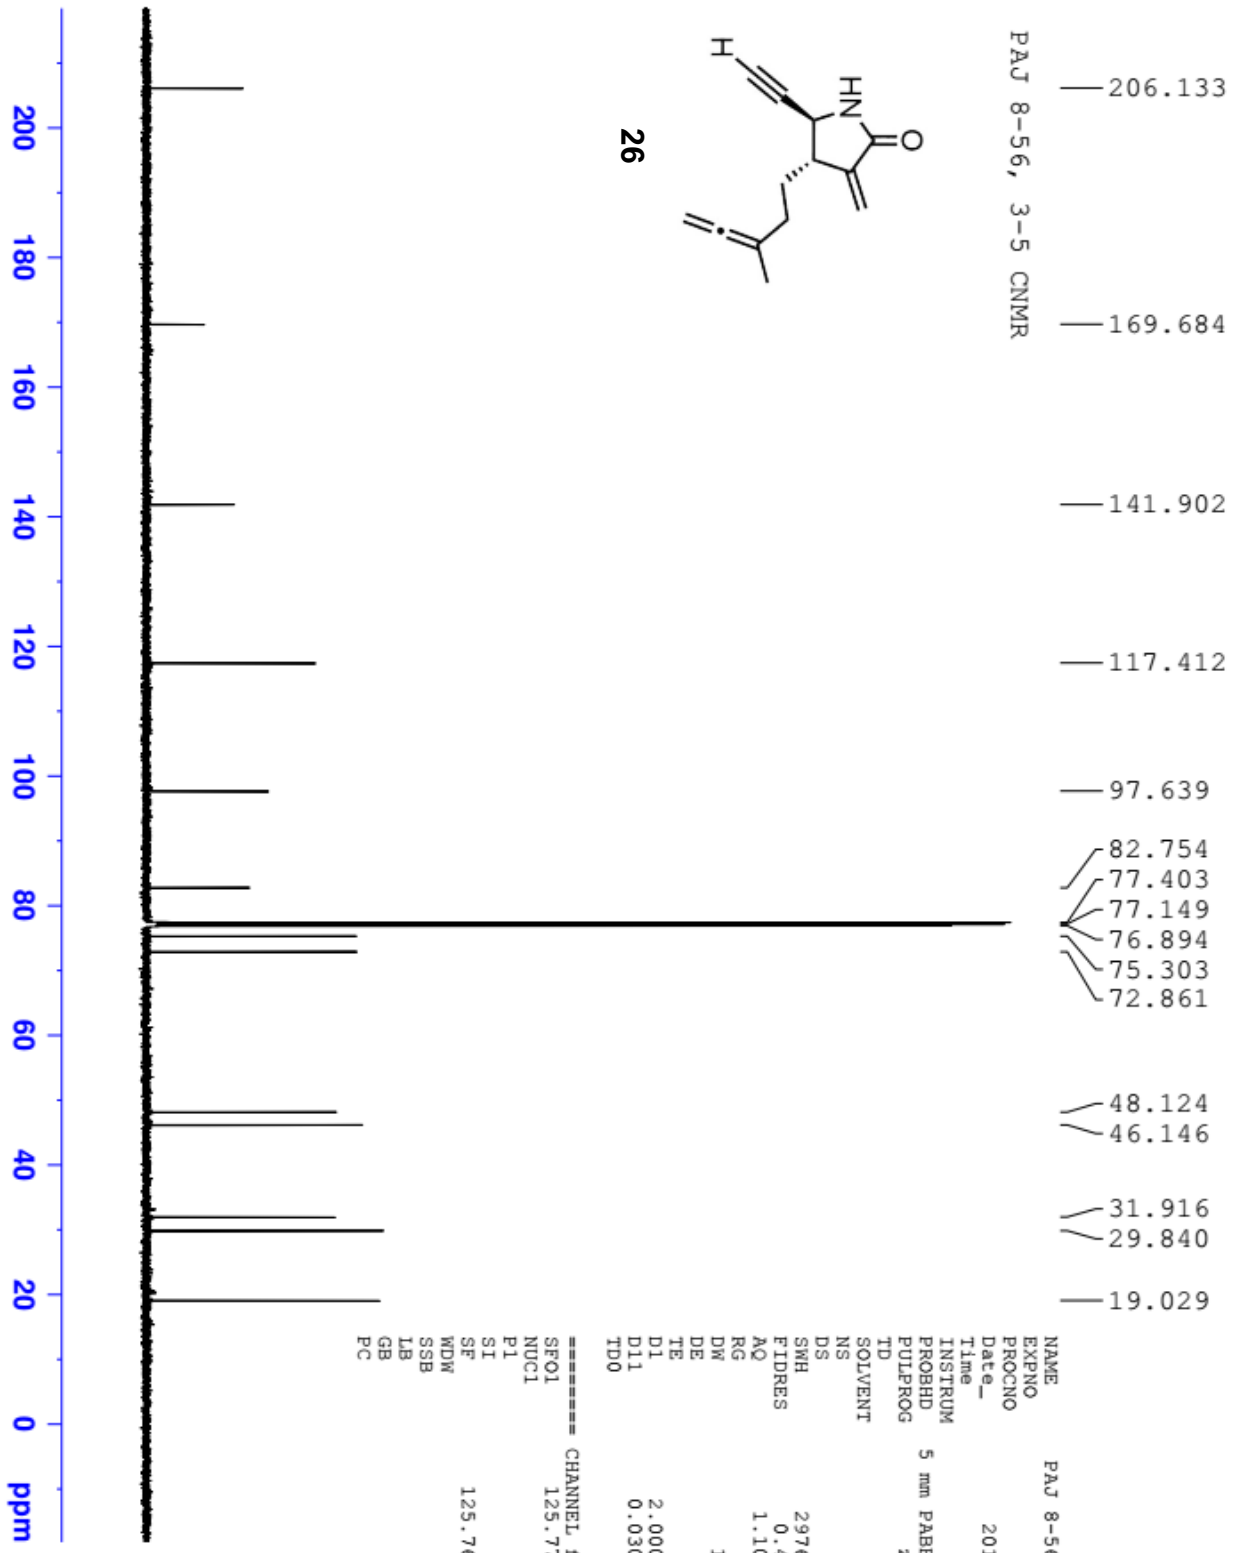

```

NAME          PAJ 8-56, 3-5
EXPNO         10
PROCNO        1
Date_         20151112
Time_         12.44
INSTRUM       spect
PROBHD        5 mm PABBO BB/
PULPROG       zgpg30
TD            65536
SOLVENT       CDCl3
NS            350
DS            2
SWH           29761.904 Hz
FIDRES        0.454131 Hz
AQ            1.1010548 sec
RG            203
DW            16.800 usec
DE            6.50 usec
TE            298.5 K
D1            2.00000000 sec
D11           0.03000000 sec
TD0           1

===== CHANNEL f1 =====
SFO1          125.7779086 MHz
NUC1          13C
P1            10.50 usec
SI            32768
SF            125.7653161 MHz
WDW           EM
SSB           0
LB            1.00 Hz
GB            0
PC            1.40

```

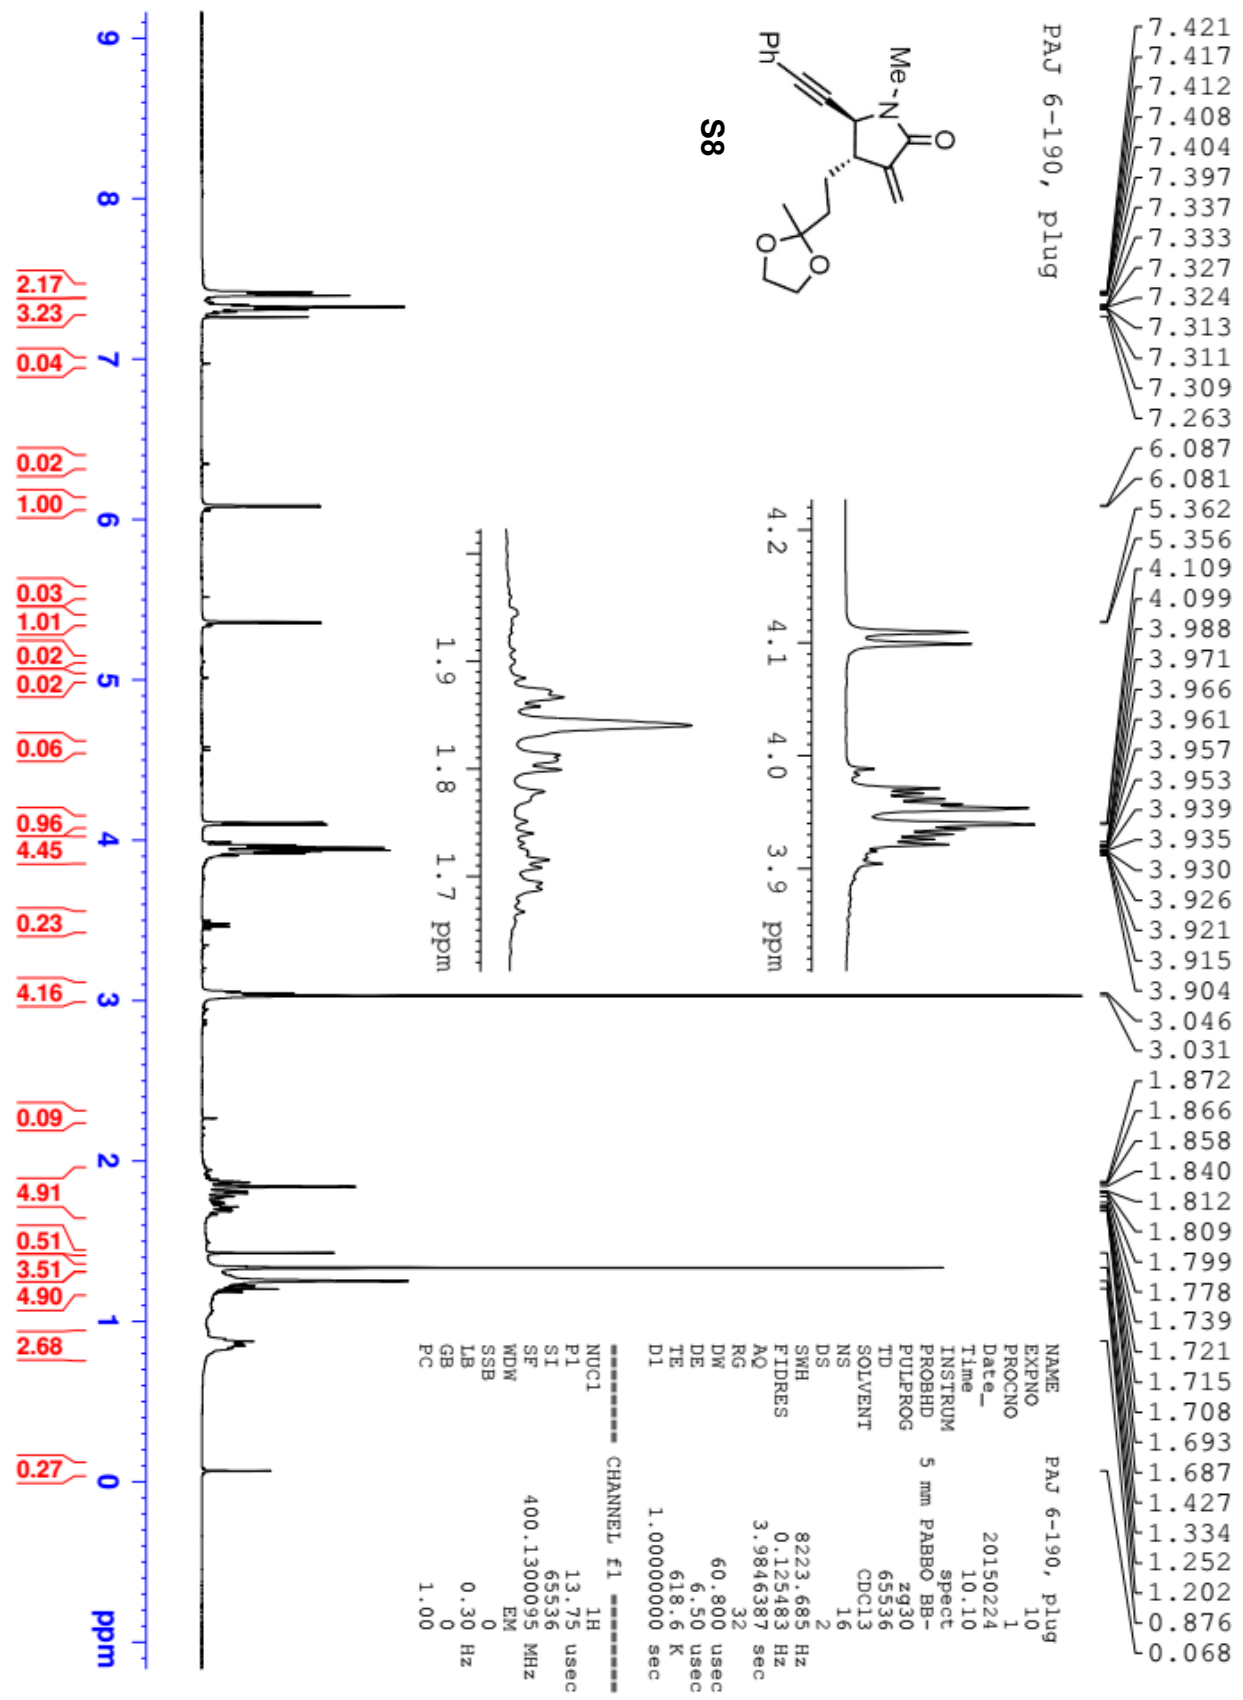

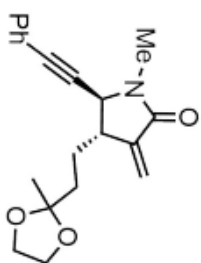

PAJ 6-190, plug CNMR

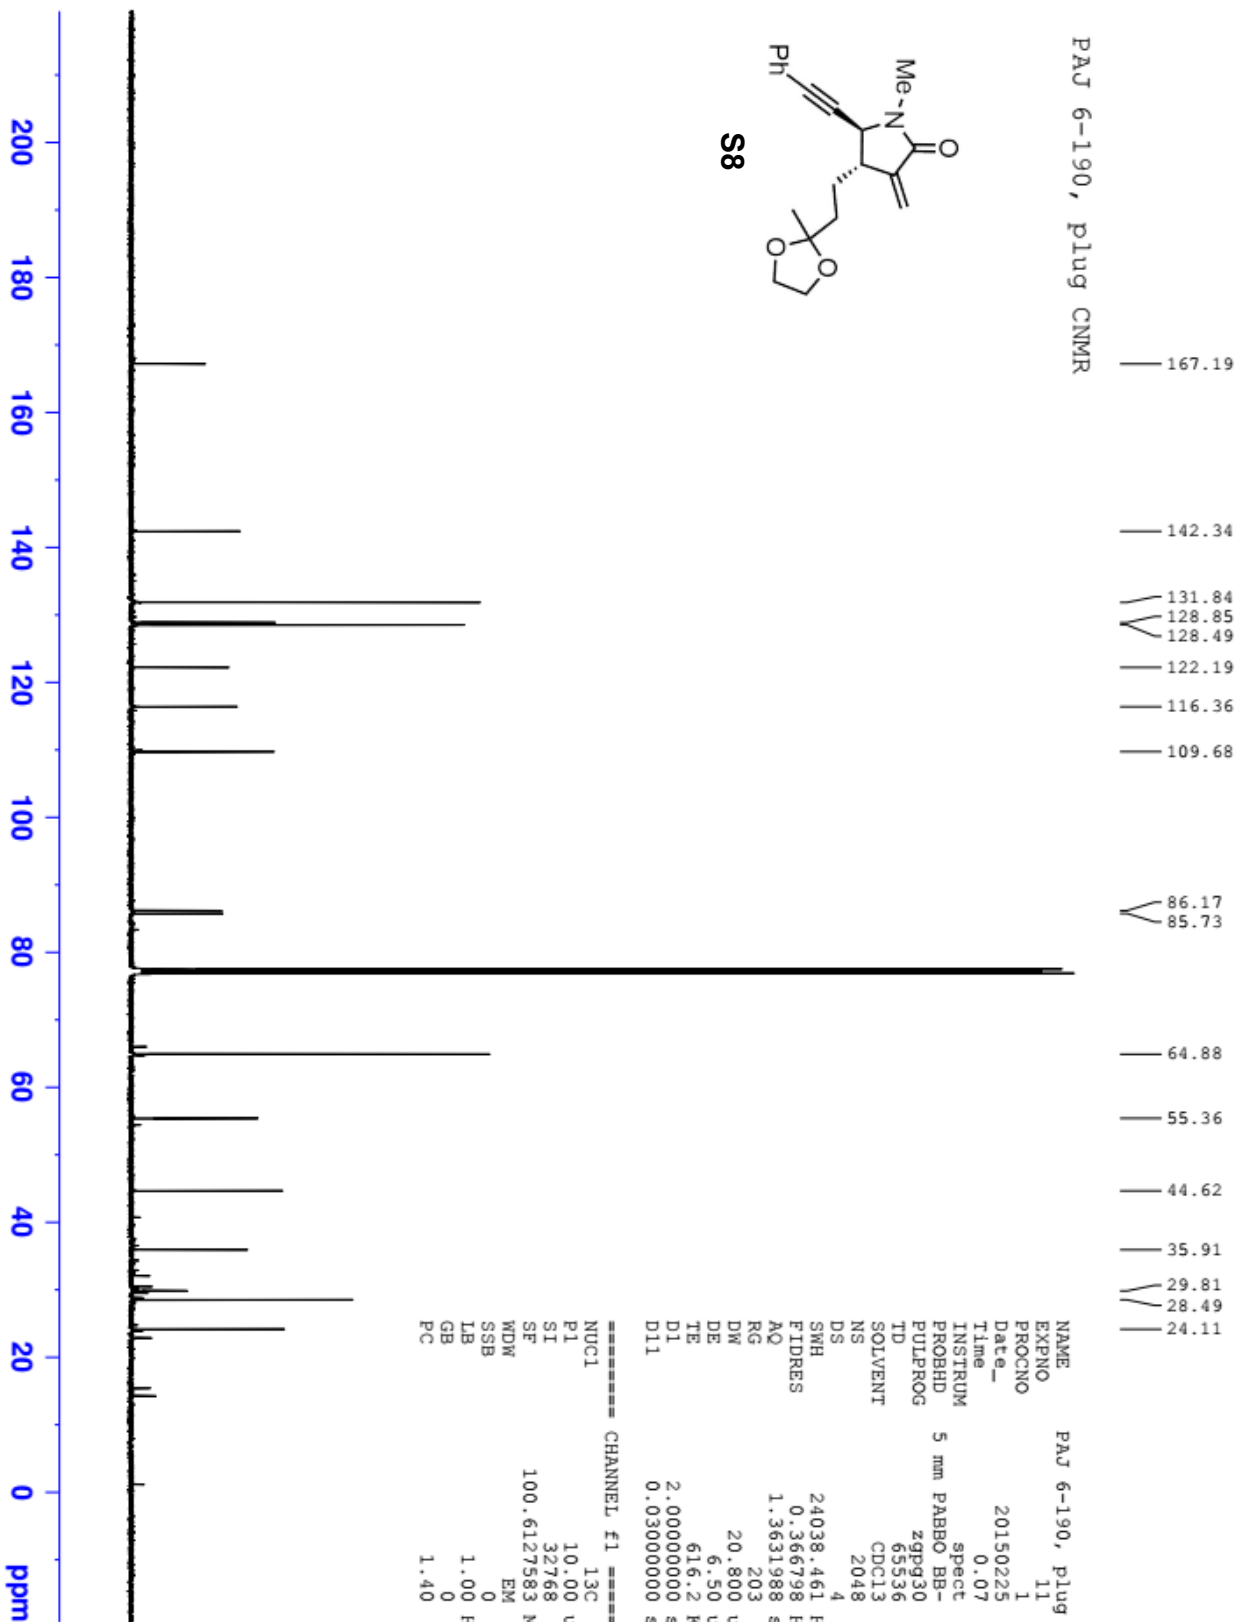



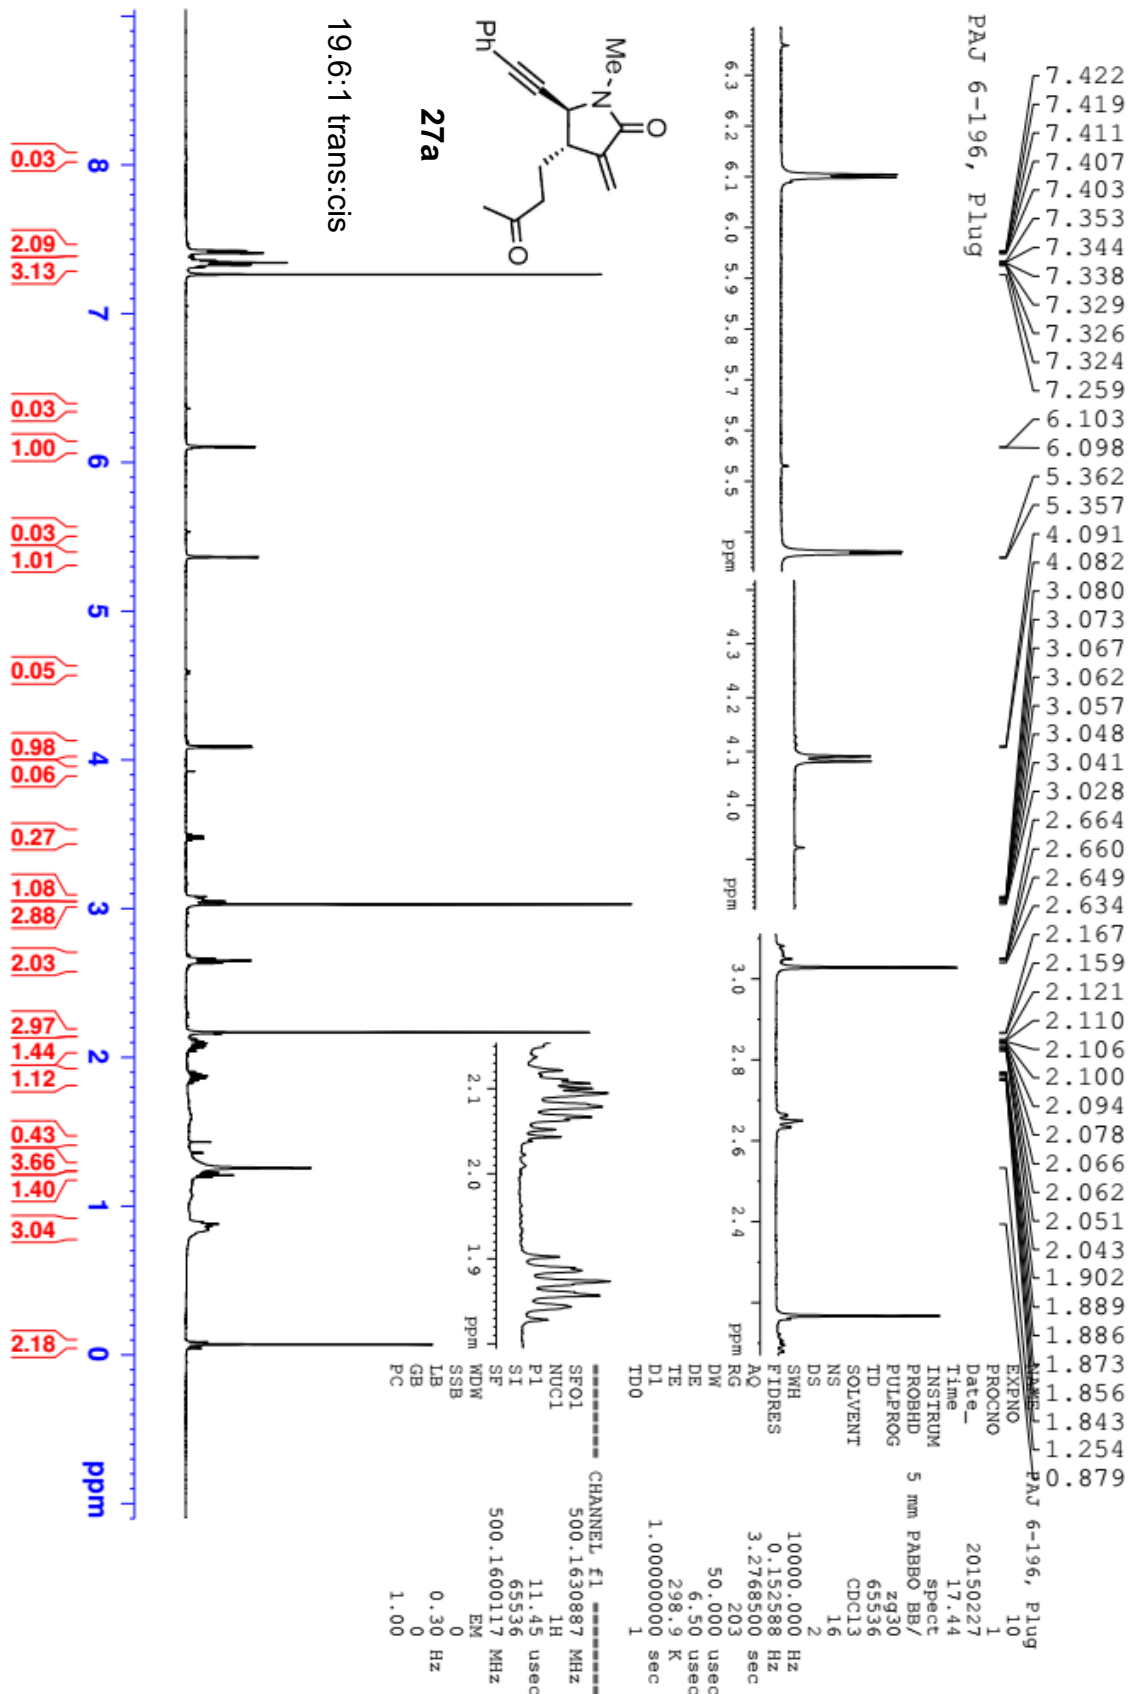

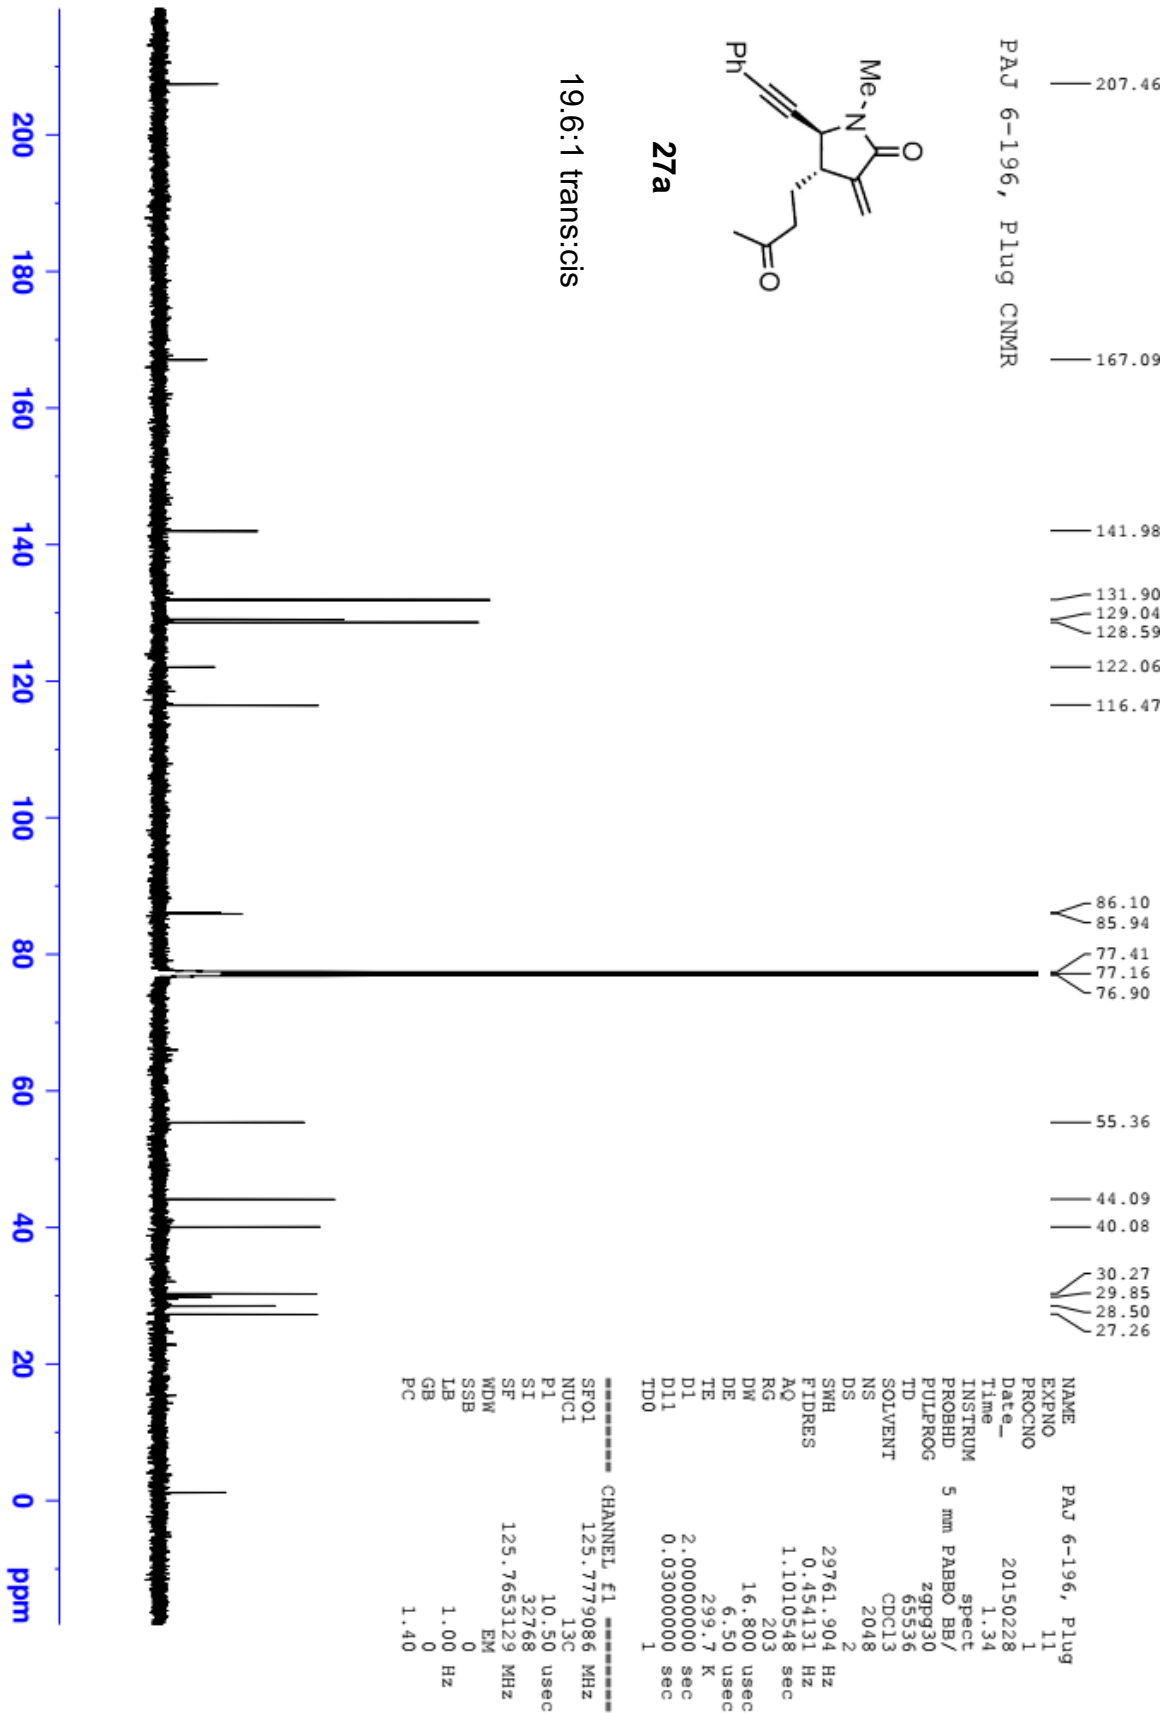

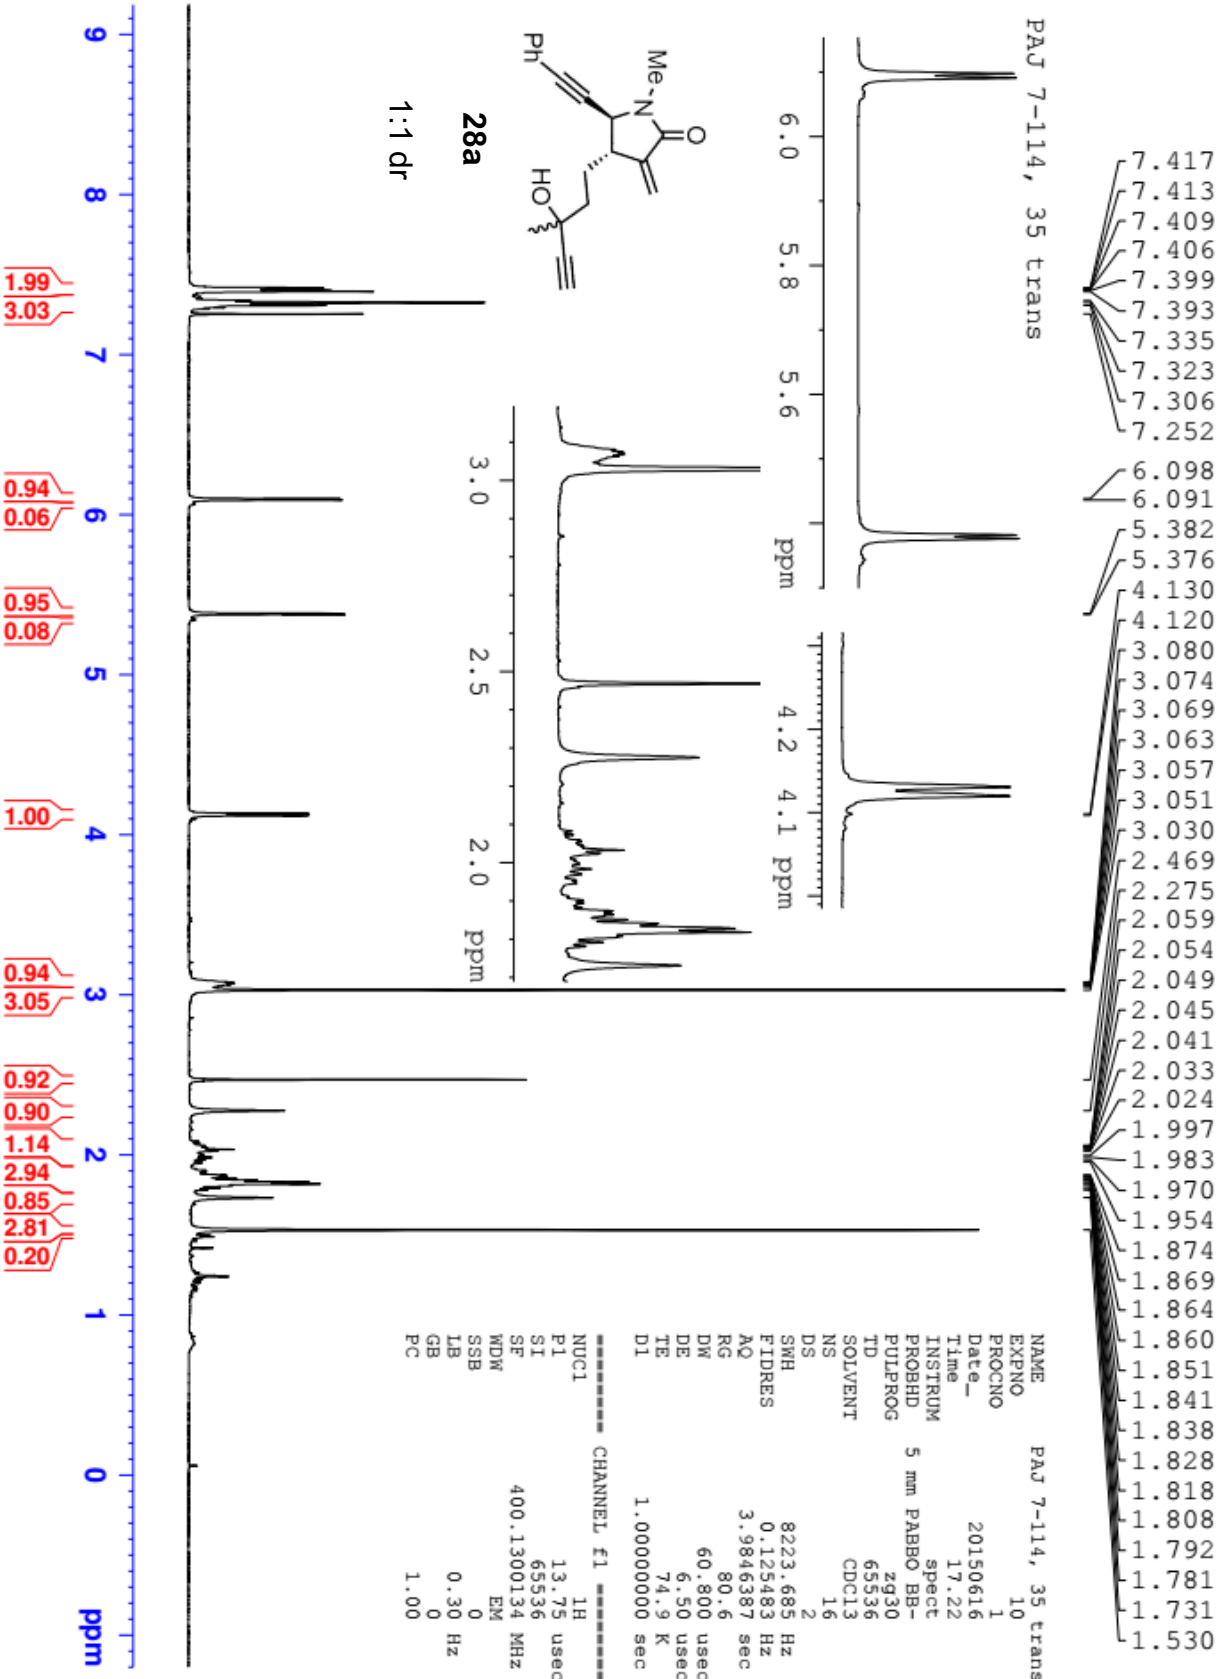

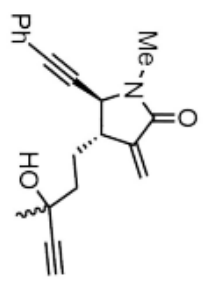

**28a**

1:1 dr

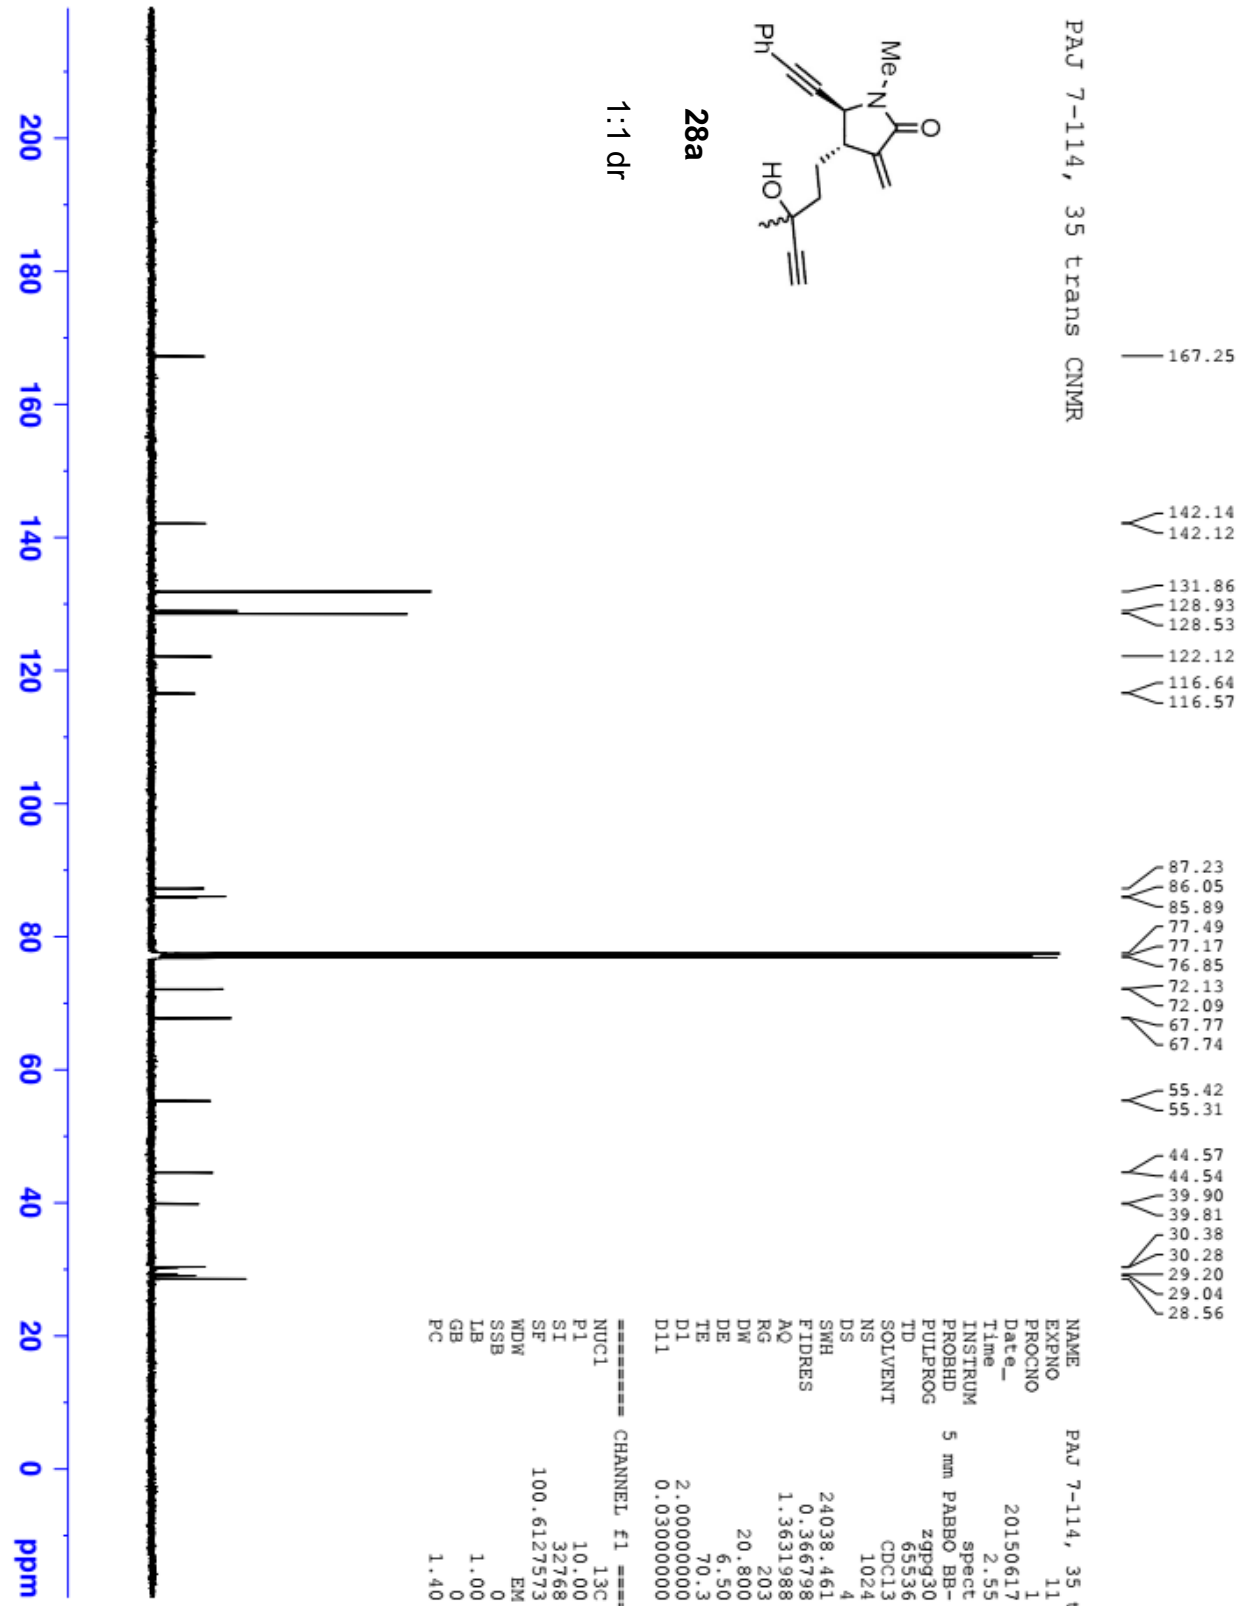

PAJ 7-114, 35 trans CNMR

- 167.25
- 142.14
- 142.12
- 131.86
- 128.93
- 128.53
- 122.12
- 116.64
- 116.57
- 87.23
- 86.05
- 85.89
- 77.49
- 77.17
- 76.85
- 72.13
- 72.09
- 67.77
- 67.74
- 55.42
- 55.31
- 44.57
- 44.54
- 39.90
- 39.81
- 30.38
- 30.28
- 29.20
- 29.04
- 28.96

```

NAME          PAJ 7-114, 35 trans
EXPNO         11
PROCNO        1
Date_         20150617
Time         2.55
INSTRUM       spect
PROBHD        5 mm PABBO BB-
PULPROG       zgpg30
TD            65536
SOLVENT       CDCl3
NS            1024
DS            4
SWH           24038.461 Hz
FIDRES       0.366798 Hz
AQ           1.3631988 sec
RG           203
DW           20.800 usec
DE           6.50 usec
TE           70.3 K
D1           2.00000000 sec
D11          0.03000000 sec

===== CHANNEL f1 =====
NUC1          13C
P1           10.00 usec
SI           32768
SF           100.6127573 MHz
WDW          EM
SSB          0
LB           1.00 Hz
GB           0
PC           1.40
  
```

PAJ 6-206, 3-6

7.420  
7.416  
7.411  
7.409  
7.407  
7.402  
7.396  
7.341  
7.338  
7.329  
7.325  
7.318  
7.312  
7.308  
7.294  
7.253  
6.106  
6.099  
5.374  
5.369  
4.122  
4.112  
3.078  
3.071  
3.065  
3.059  
3.054  
3.048  
3.034  
2.580  
2.579  
2.164  
2.153  
2.129  
2.124  
2.102  
2.094  
2.073  
2.068  
2.031  
1.980  
1.960  
1.952  
1.926  
1.896  
1.887  
1.848  
1.842  
1.839  
1.819  
1.810  
1.701  
1.239  
0.057

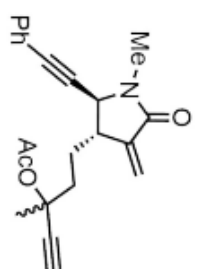

29a  
1:1 dr

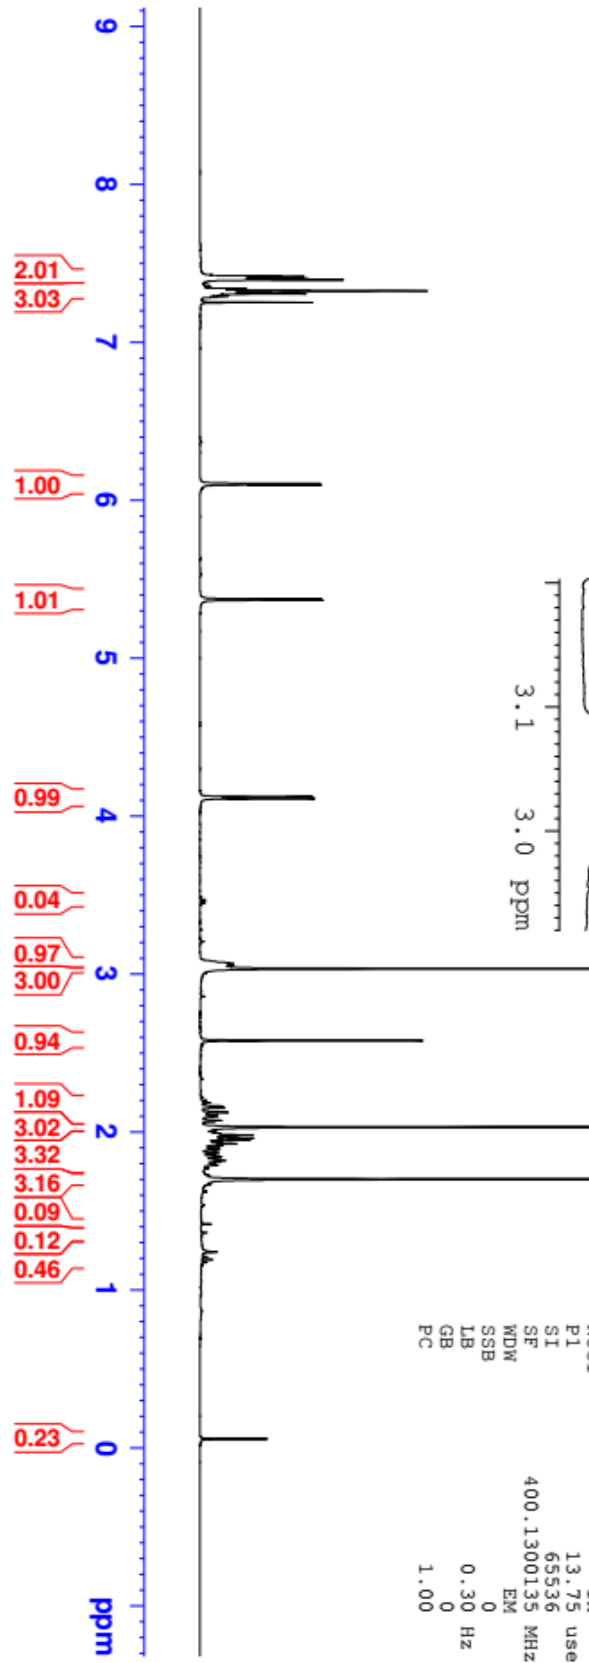

NAME PAJ 6-206, 3-6  
EXPNO 10  
PROCNO 1  
Date\_ 20150305  
Time 16.31  
INSTRUM spect  
PROBHD 5 mm PABBO BB-  
PULPROG zg30  
TD 65536  
SOLVENT CDCl3  
NS 16  
DS 2  
SWH 8223.685 Hz  
FIDRES 0.125483 Hz  
AQ 3.9846387 sec  
RG 71.8  
DW 60.800 usec  
DE 6.50 usec  
TE 94.8 K  
D1 1.00000000 sec

----- CHANNEL f1 -----  
NUC1 1H  
P1 13.75 usec  
SI 65536  
SF 400.1300135 MHz  
WDW EM  
SSB 0  
LB 0.30 Hz  
GB 0  
PC 1.00

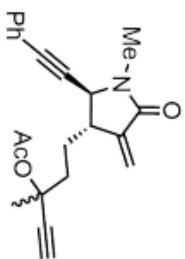

**29a**

1:1 dr

PAJ 6-206, 3-6 CNMR

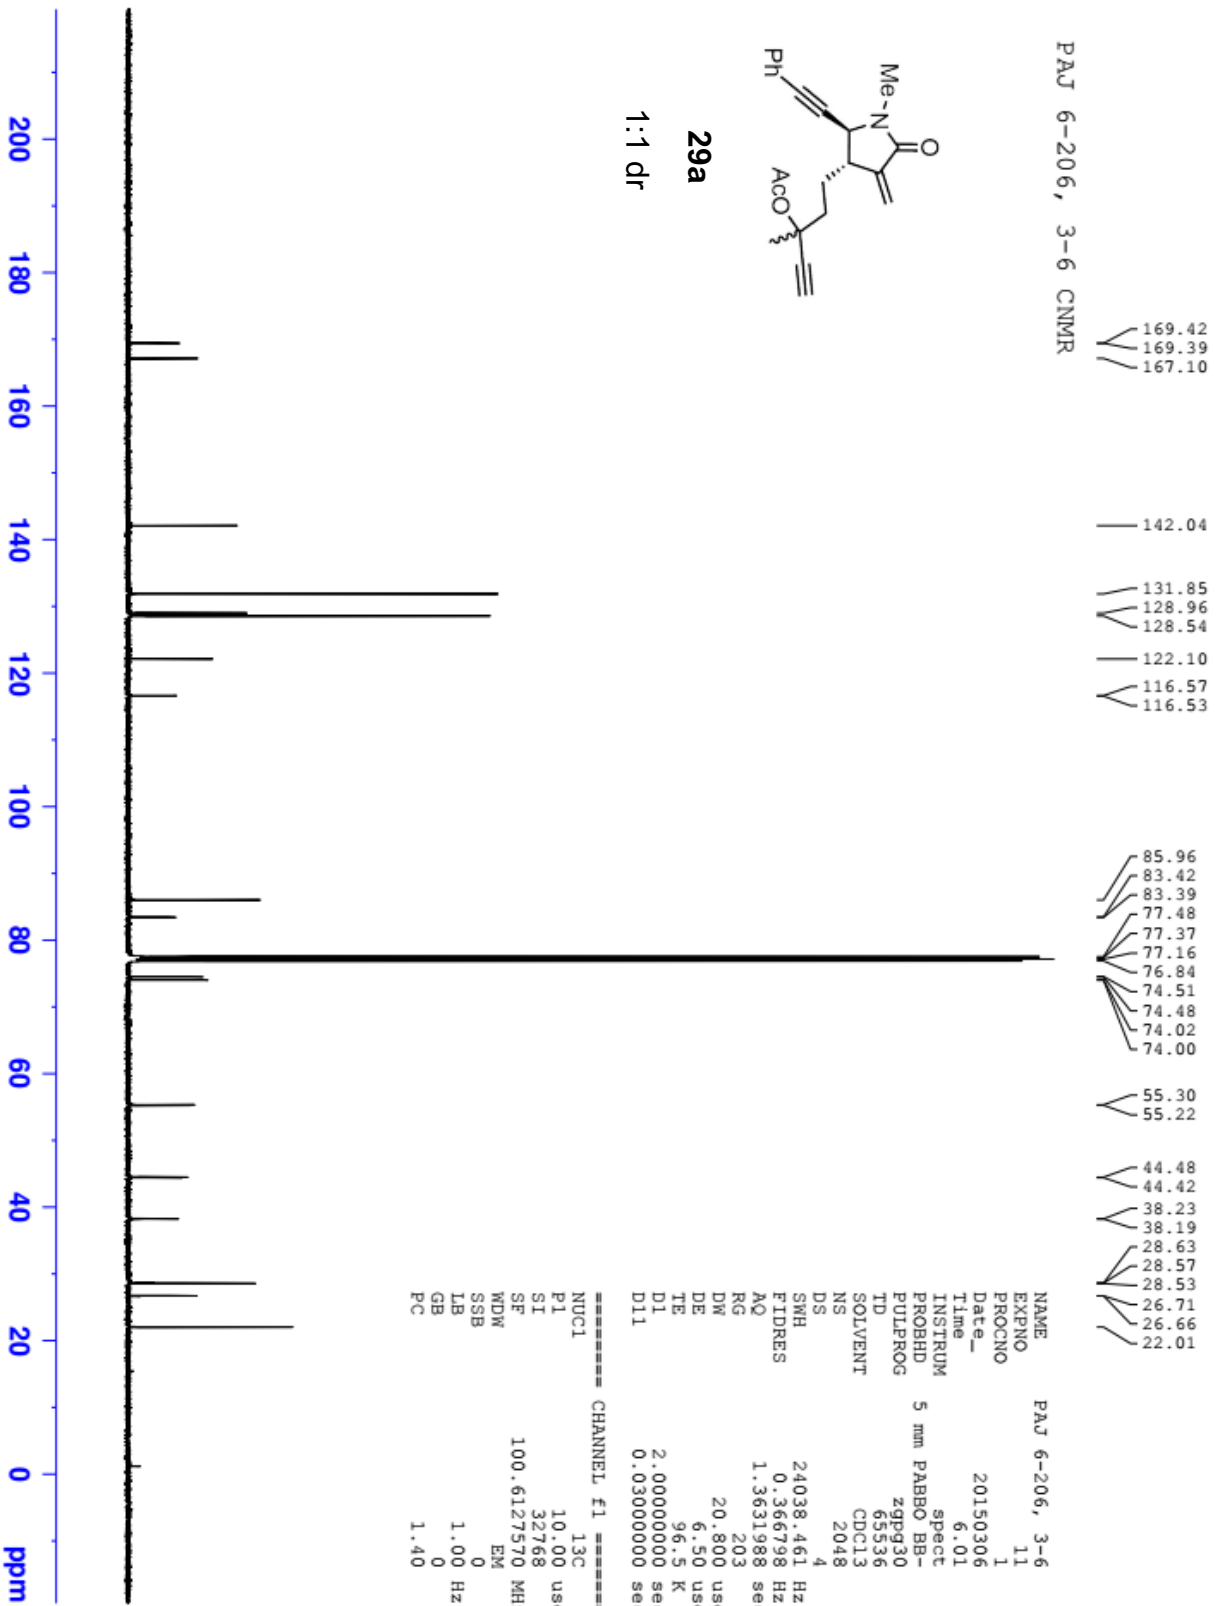

```

NAME          PAJ 6-206, 3-6
EXPNO         11
PROCNO        1
Date_         20150306
Time         6.01
INSTRUM       spect
PROBHD        5 mm PABBO BB-
PULPROG       zgpg30
TD            65536
SOLVENT       CDCl3
NS            2048
DS            4
SWH           24038.461 Hz
FIDRES        0.366798 Hz
AQ            1.3631988 sec
RG            203
DW            20.800 usec
DE            6.50 usec
TE            96.5 K
D1            2.00000000 sec
D11           0.03000000 sec

===== CHANNEL #1 =====
NUC1          13C
P1            10.00 usec
S1            32768
SF            100.6127570 MHz
WDW           EM
SSB           0
LB            1.00 Hz
GB            0
PC            1.40
  
```

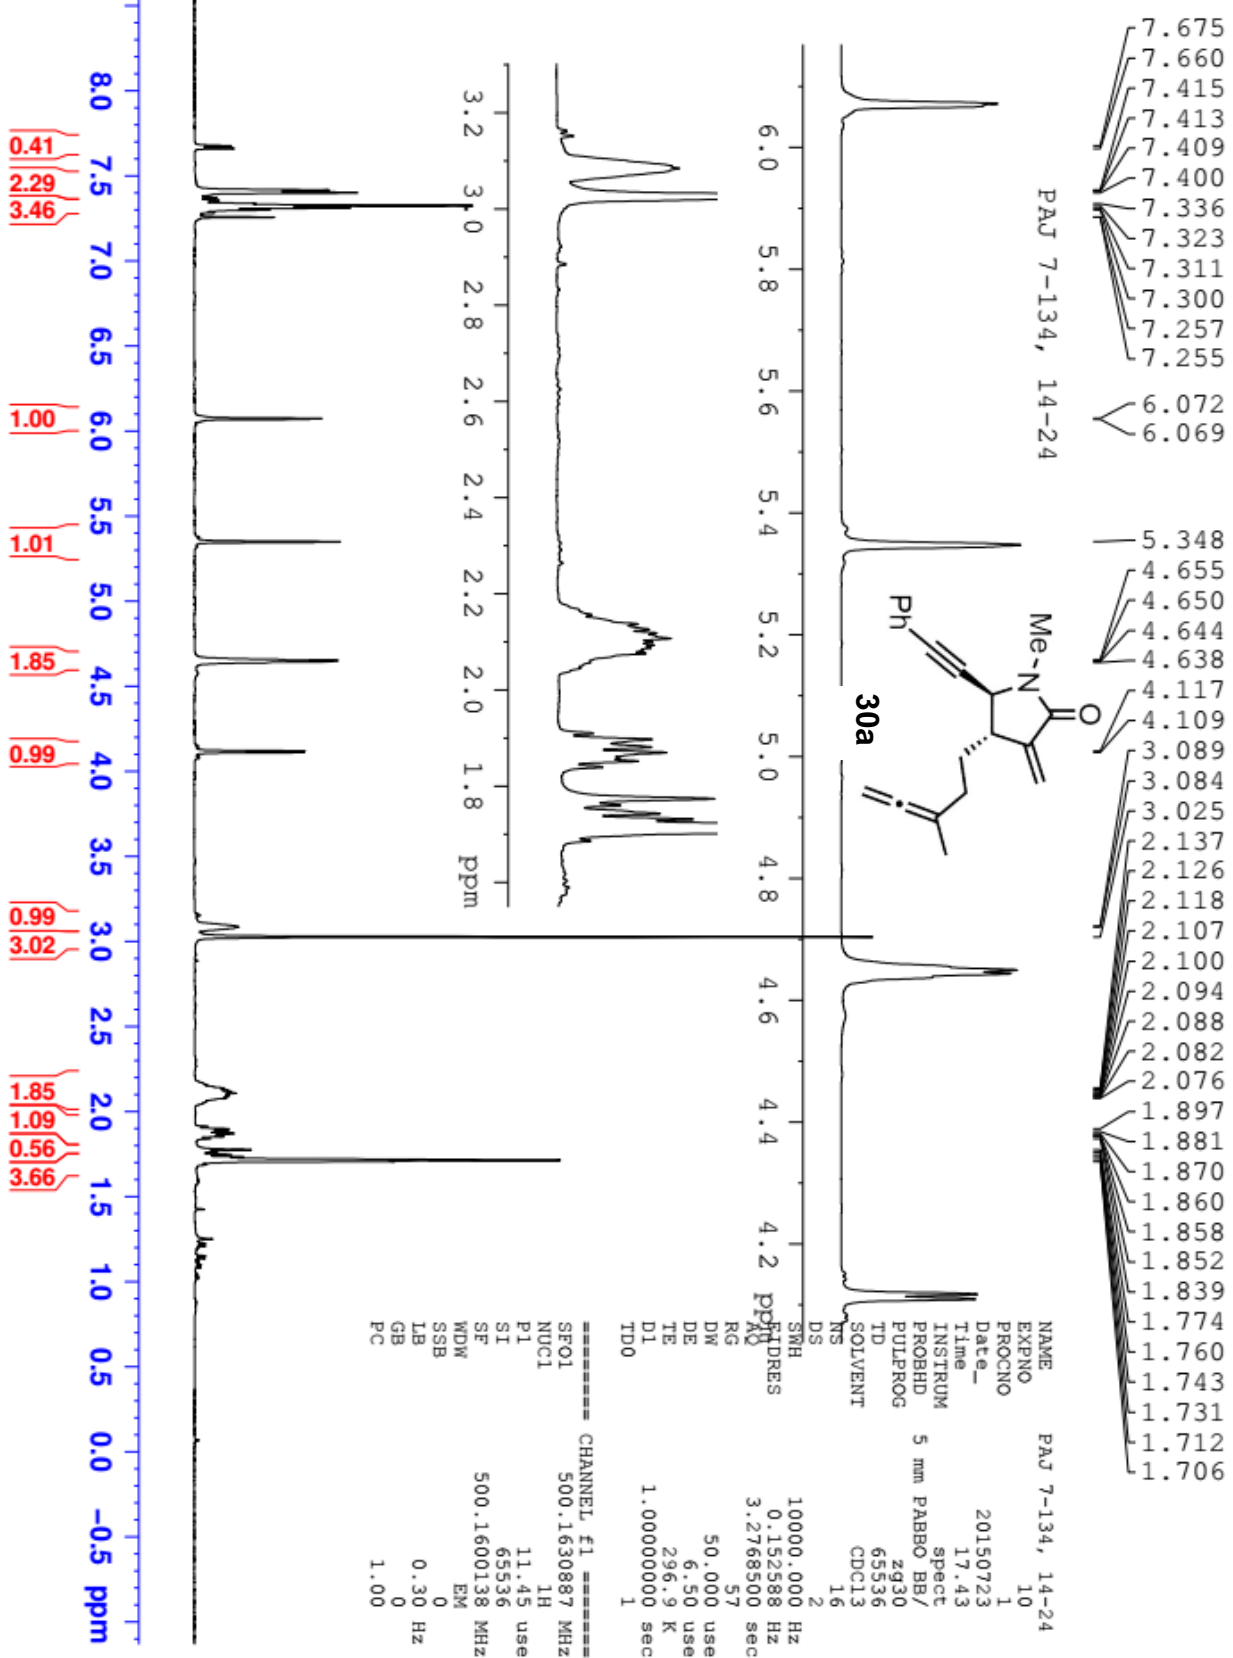

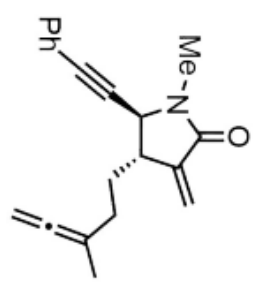

PAJ 7-134, 14-24 CNMR

- 206.168
- 167.299
- ↘ 142.449
- ↘ 134.527
- ↘ 131.851
- ↘ 128.865
- ↘ 128.510
- ↘ 127.838
- ↘ 122.240
- ↘ 116.303
- 97.694
- ↘ 86.224
- ↘ 85.733
- ↘ 77.415
- ↘ 77.161
- ↘ 76.906
- ↘ 75.246
- 55.539
- 44.194
- ↘ 32.170
- ↘ 30.005
- ↘ 28.517
- 19.078

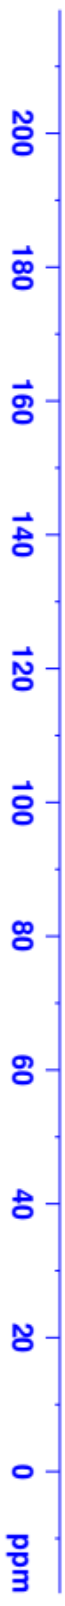

```

NAME          PAJ 7-134, 14-24
EXPNO         11
PROCNO        1
Date_         20150724
Time          2.40
INSTRUM       spect
PROBHD        5 mm PABBO BB/
PULPROG       zgpg30
TD            65536
SOLVENT       CDCl3
NS            1024
DS            2
SWH           29761.904 Hz
FIDRES       0.454131 Hz
AQ           1.1010548 sec
RG           203
DE           16.800 usec
TE           297.9 K
D1           2.00000000 sec
D11          0.03000000 sec
TD0          1

===== CHANNEL f1 =====
SFO1         125.7779086 MHz
NUC1         13C
P1           10.50 usec
SI           32768
SF          125.7653171 MHz
WDW          EM
SSB          0
LB           1.00 Hz
GB           0
PC           1.40
  
```



PAJ 8-71, 18-32

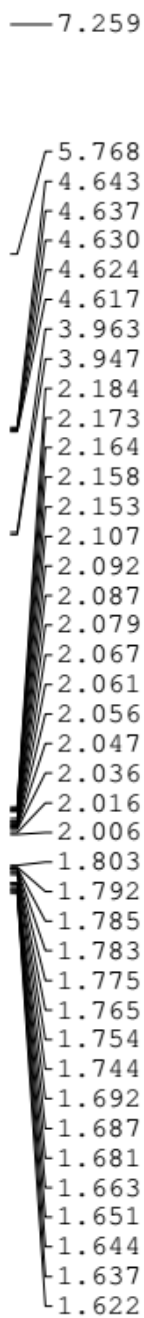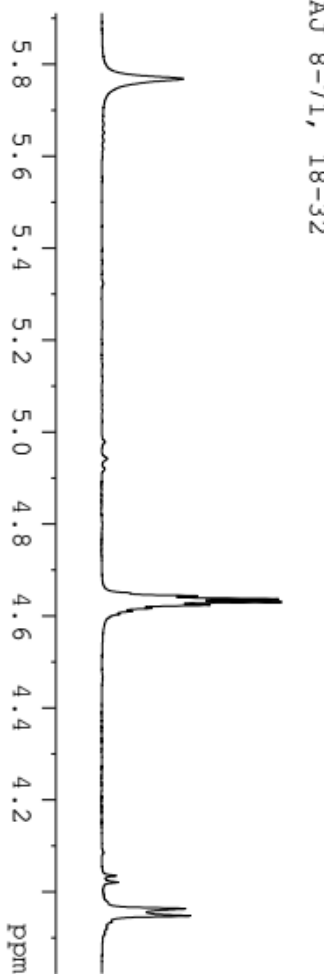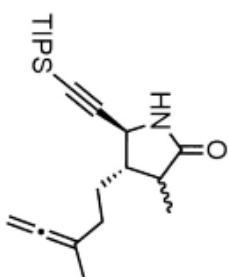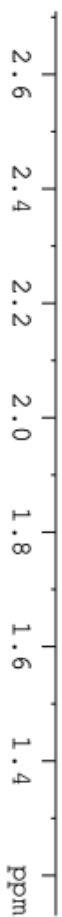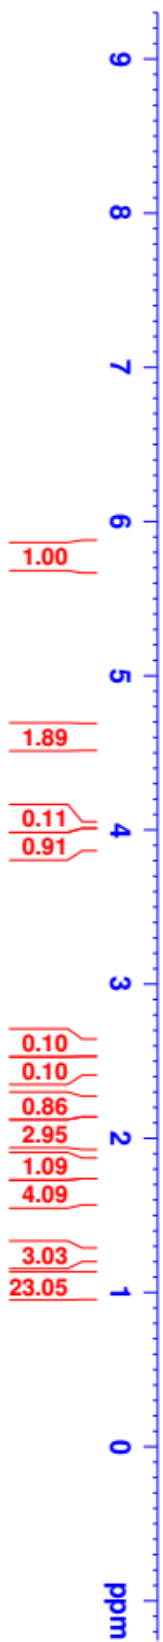

```

NAME          PAJ 8-71, 18-32
EXPNO         10
PROCNO        1
Date_         20151210
Time          17.16
INSTRUM       spect
PROBHD        5 mm PABBO BB/
PULPROG       zg30
TD            65536
SOLVENT       CDCl3
NS            16
DS            2
SWH           10000.000 Hz
FIDRES        0.152588 Hz
AQ            3.2768500 sec
RG            90.5
DW            50.000 usec
DE            6.50 usec
TE            298.0 K
D1            1.00000000 sec
TD0           1

===== CHANNEL f1 =====
SFO1          500.1630887 MHz
NUC1          1H
P1            11.45 usec
SI            65536
SF            500.1600127 MHz
WDW           EM
SSB           0
LB            0.30 Hz
GB            0
PC            1.00
  
```

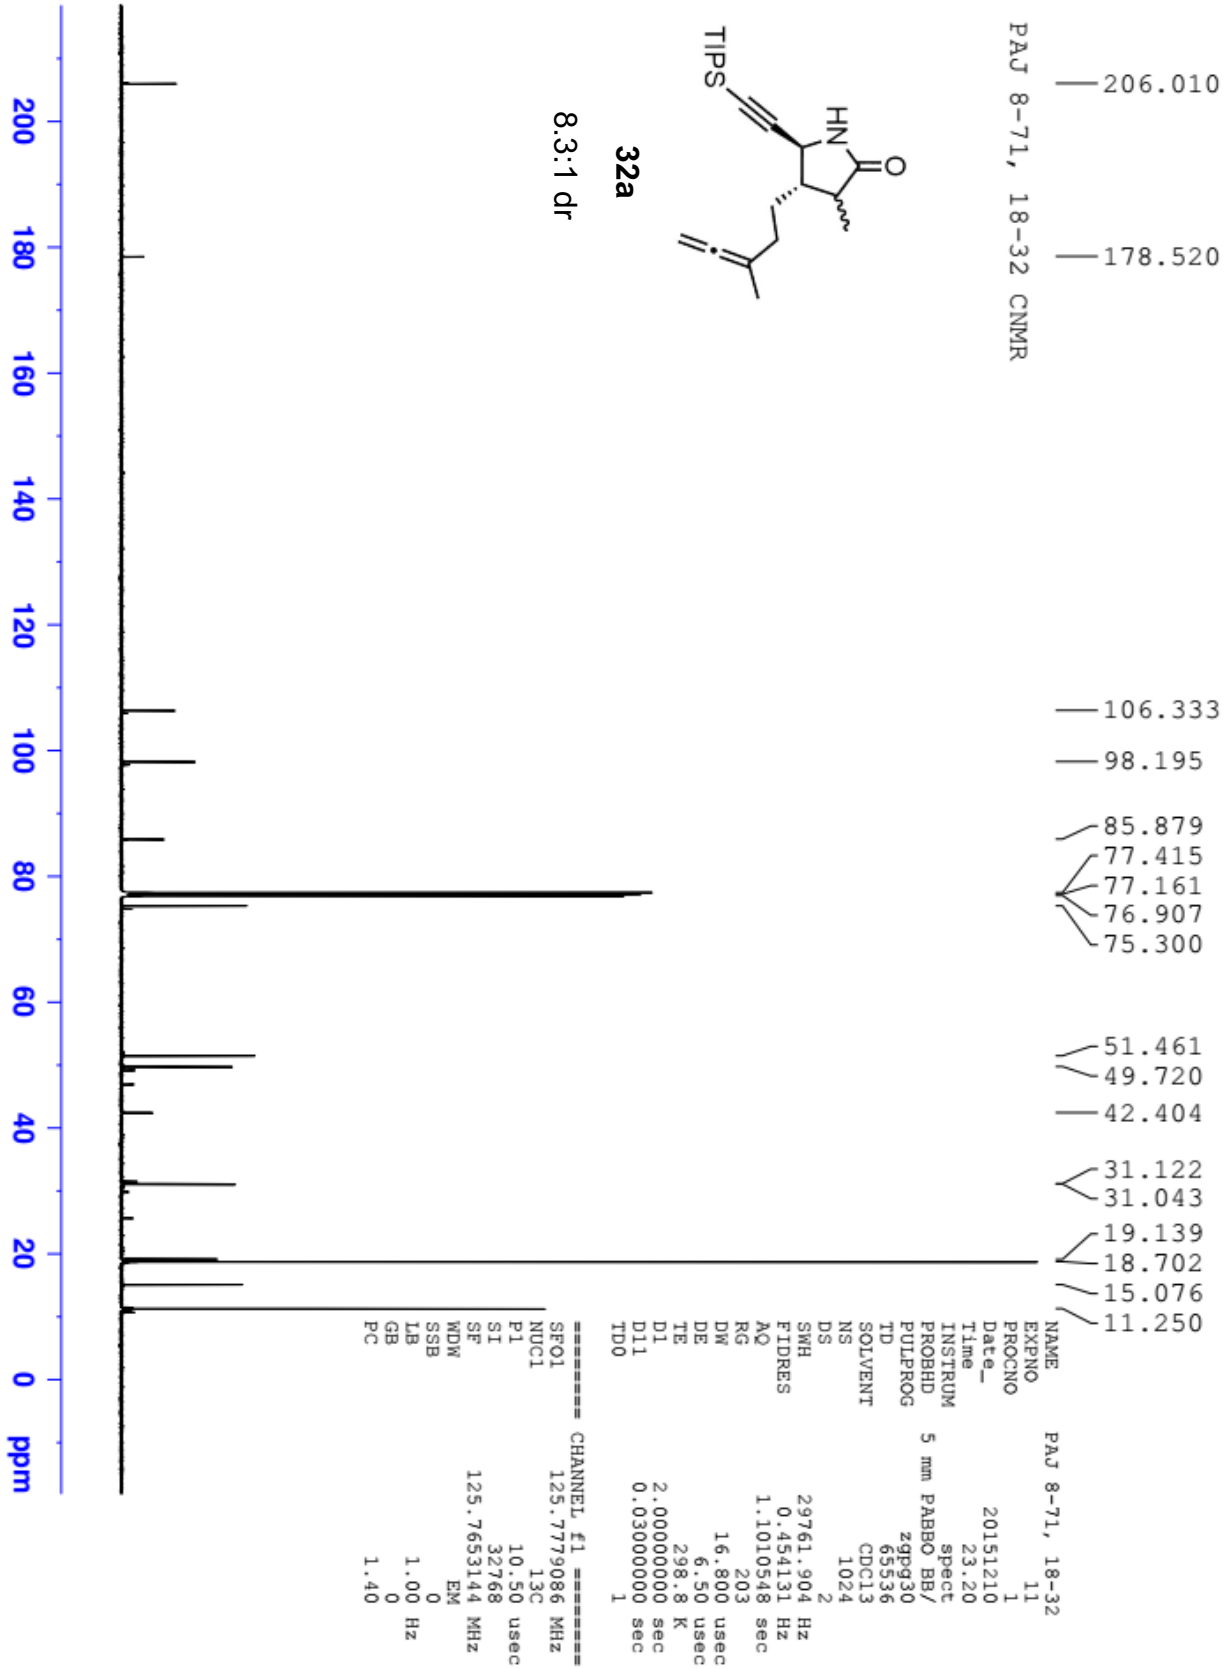

PAJ 8-204, 4-6

7.772  
7.769  
7.750  
7.748  
7.441  
7.436  
7.422  
7.405  
7.401  
7.318  
7.313  
7.300  
7.297  
7.288  
7.285  
7.281  
7.272  
7.267  
7.259  
7.251  
7.244  
7.241  
7.223  
7.204  
6.254  
6.248  
5.515  
5.510  
4.695  
4.687  
4.676  
4.668  
4.660  
3.261  
3.250  
3.245  
3.234  
3.226  
2.179  
2.170  
2.160  
2.151  
2.142  
2.133  
1.907  
1.890  
1.870  
1.852  
1.833  
1.742  
1.734  
1.726  
1.609  
1.050  
1.033

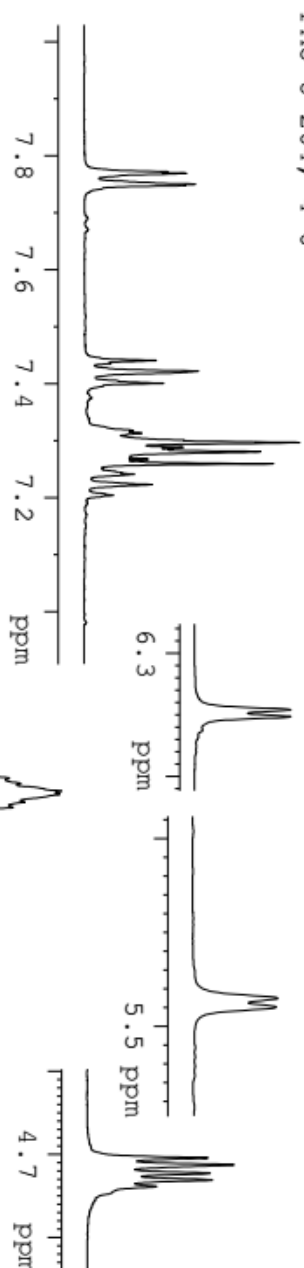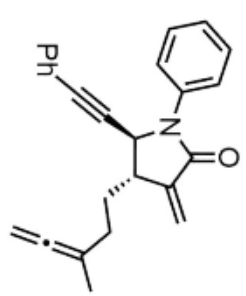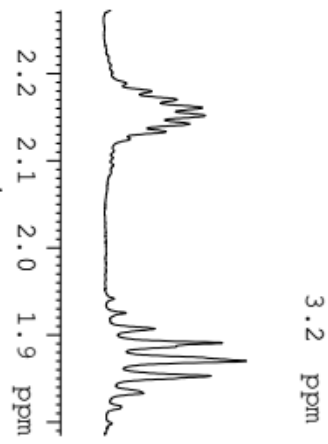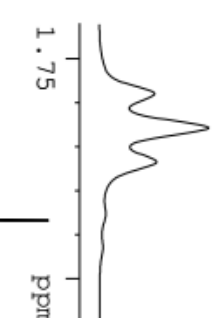

```

NAME          PAJ 8-204, 4-6
EXPNO         10
PROCNO        1
Date_         20160602
Time         11.36
INSTRUM       5 mm PABBO BH-
PROBHD        zg30
PULPROG       65536
TD            CDC13
SOLVENT       DMS
NS            16
DS            2
SWH           8012.820 Hz
FIDRES       0.122266 Hz
AQ           4.0894966 sec
RG           90.5
DE           62.400 usec
TE           96.4 K
D1           1.000000000 sec
TD0          1

===== CHANNEL f1 =====
SFO1          400.1324710 MHz
NUC1          1H
P1           13.75 usec
SI           65536
SF           400.1300101 MHz
WDW          EM
SSB          0
LB           0.30 Hz
GB           0
PC           1.00
  
```

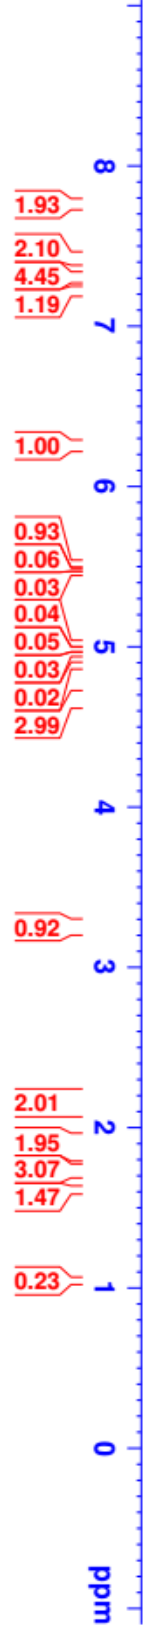

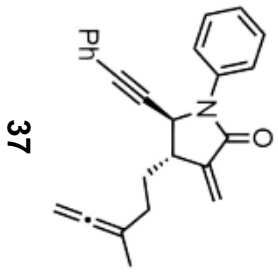

PAJ 8-204, 4-6 CNMR

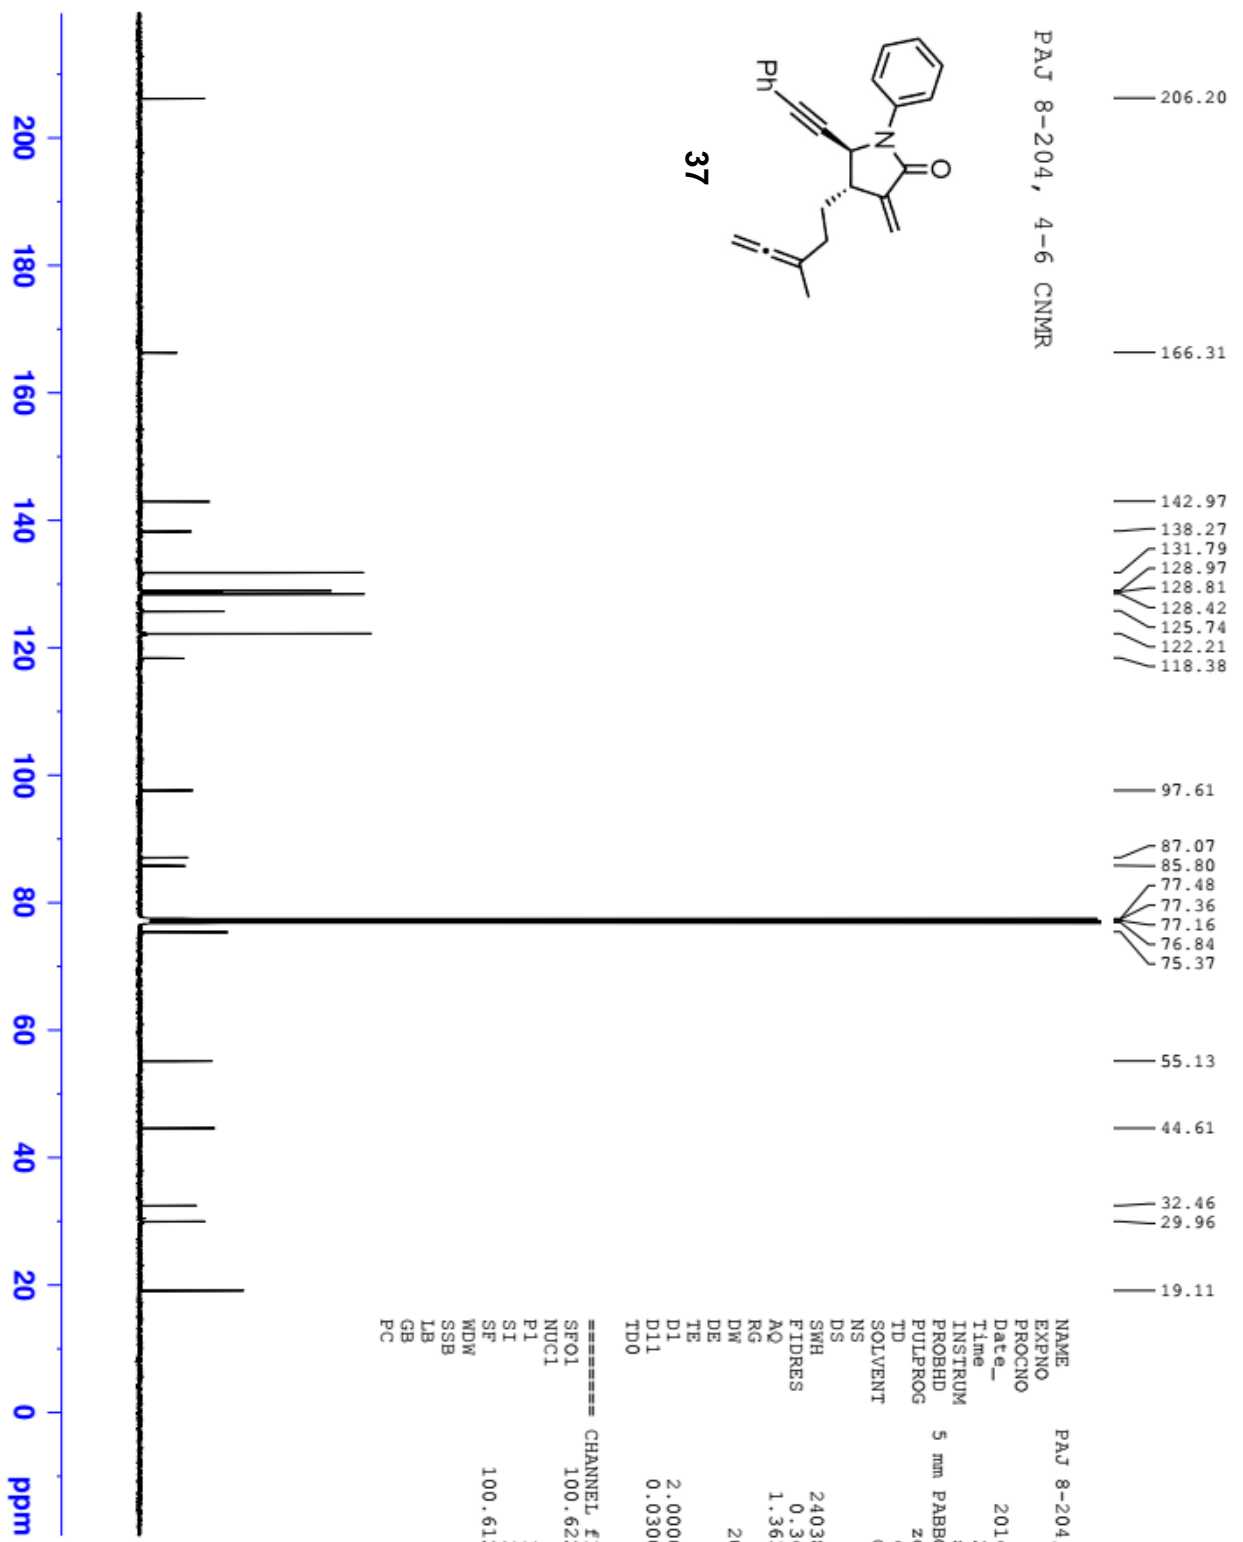

```

NAME          PAJ 8-204, 4-6
EXPNO         11
PROCNO        1
Date_         20160602
Time         22.56
INSTRUM       5 mm PABBO BB-
PROBHD        zgpg30
PULPROG       65536
TD            CDC13
SOLVENT       3000
NS            4
DS            4
SWH           24038.461 Hz
FIDRES       0.366798 Hz
AQ           1.3631988 sec
RG           203
DW           20.800 usec
DE           6.50 usec
TE           95.9 K
D1           2.00000000 sec
D11          0.03000000 sec
TD0          1

===== CHANNEL f1 =====
SF01         100.6228293 MHz
NUC1         13C
P1           10.00 usec
SI           32768
SF           100.6127562 MHz
WDW          EM
SSB          0
LB           1.00 Hz
GB           0
PC           1.40
  
```

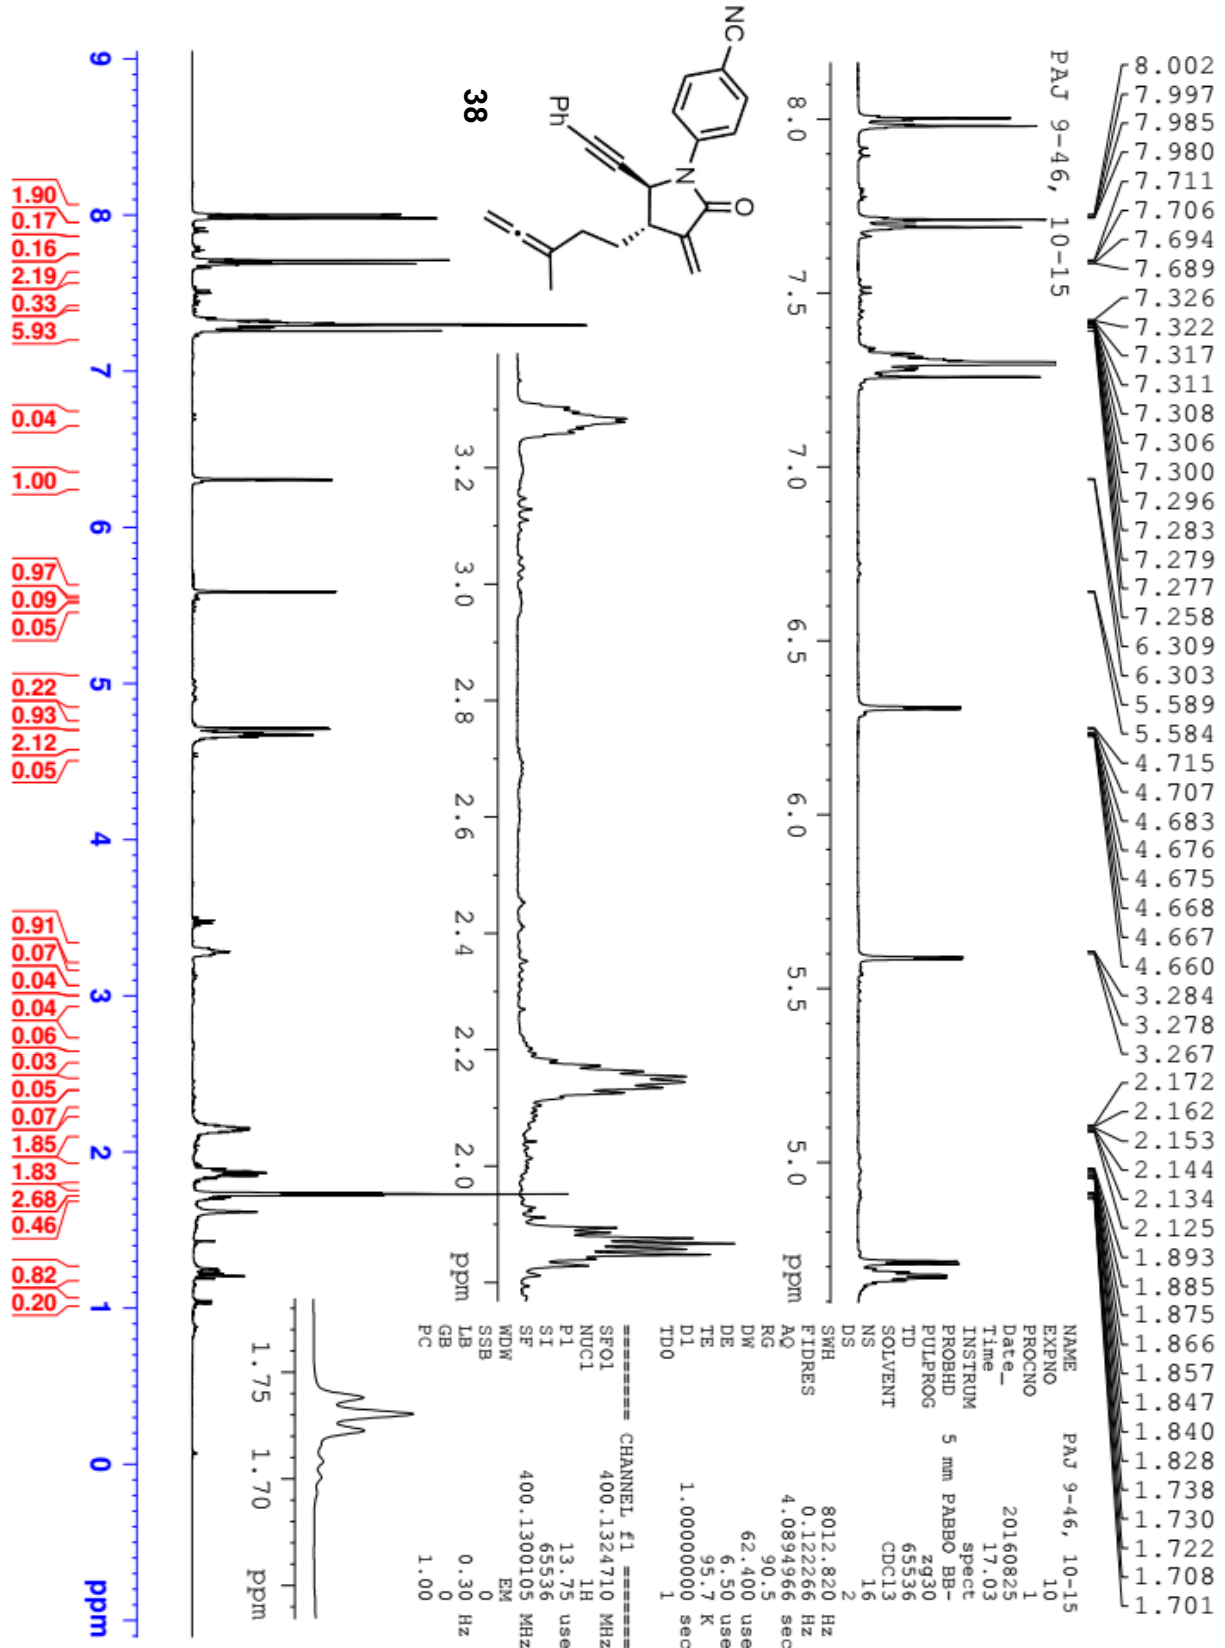

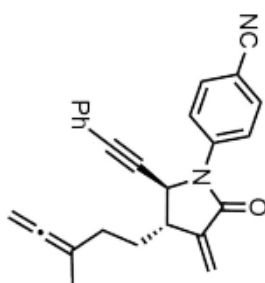

38

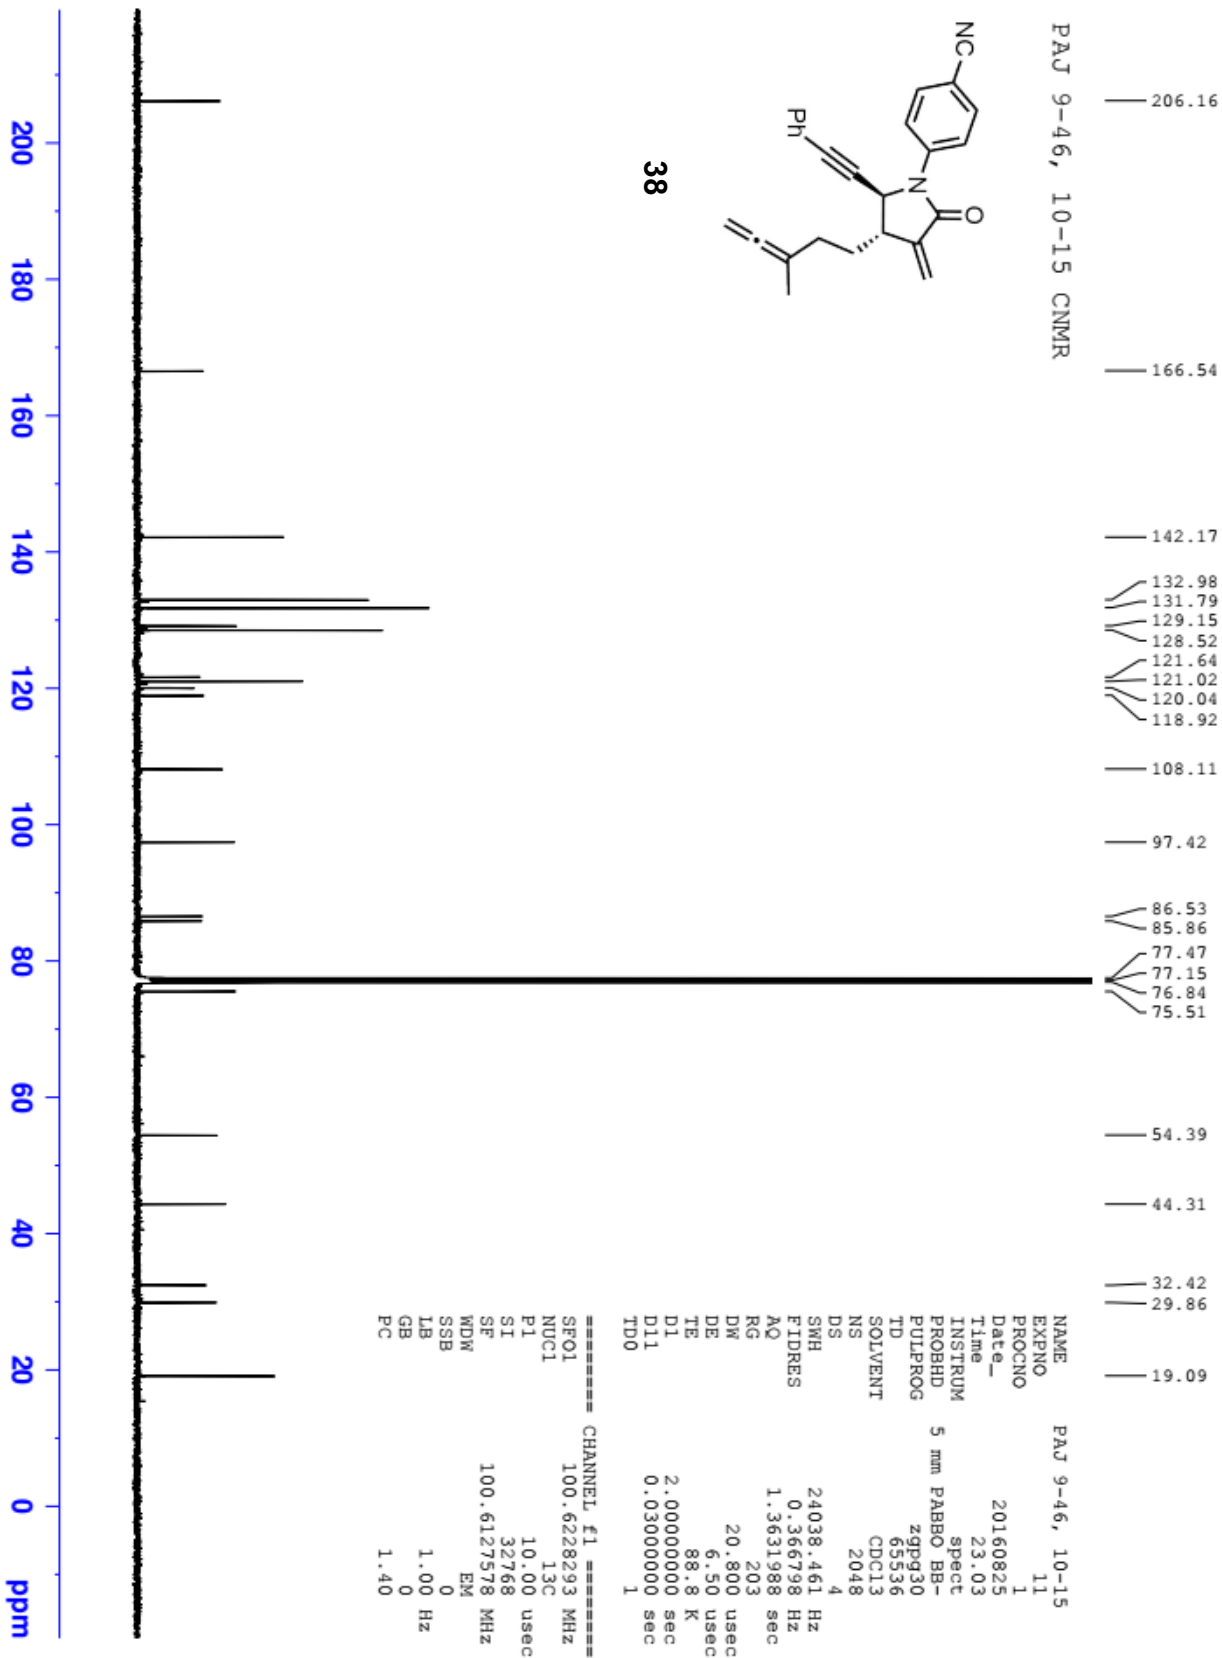

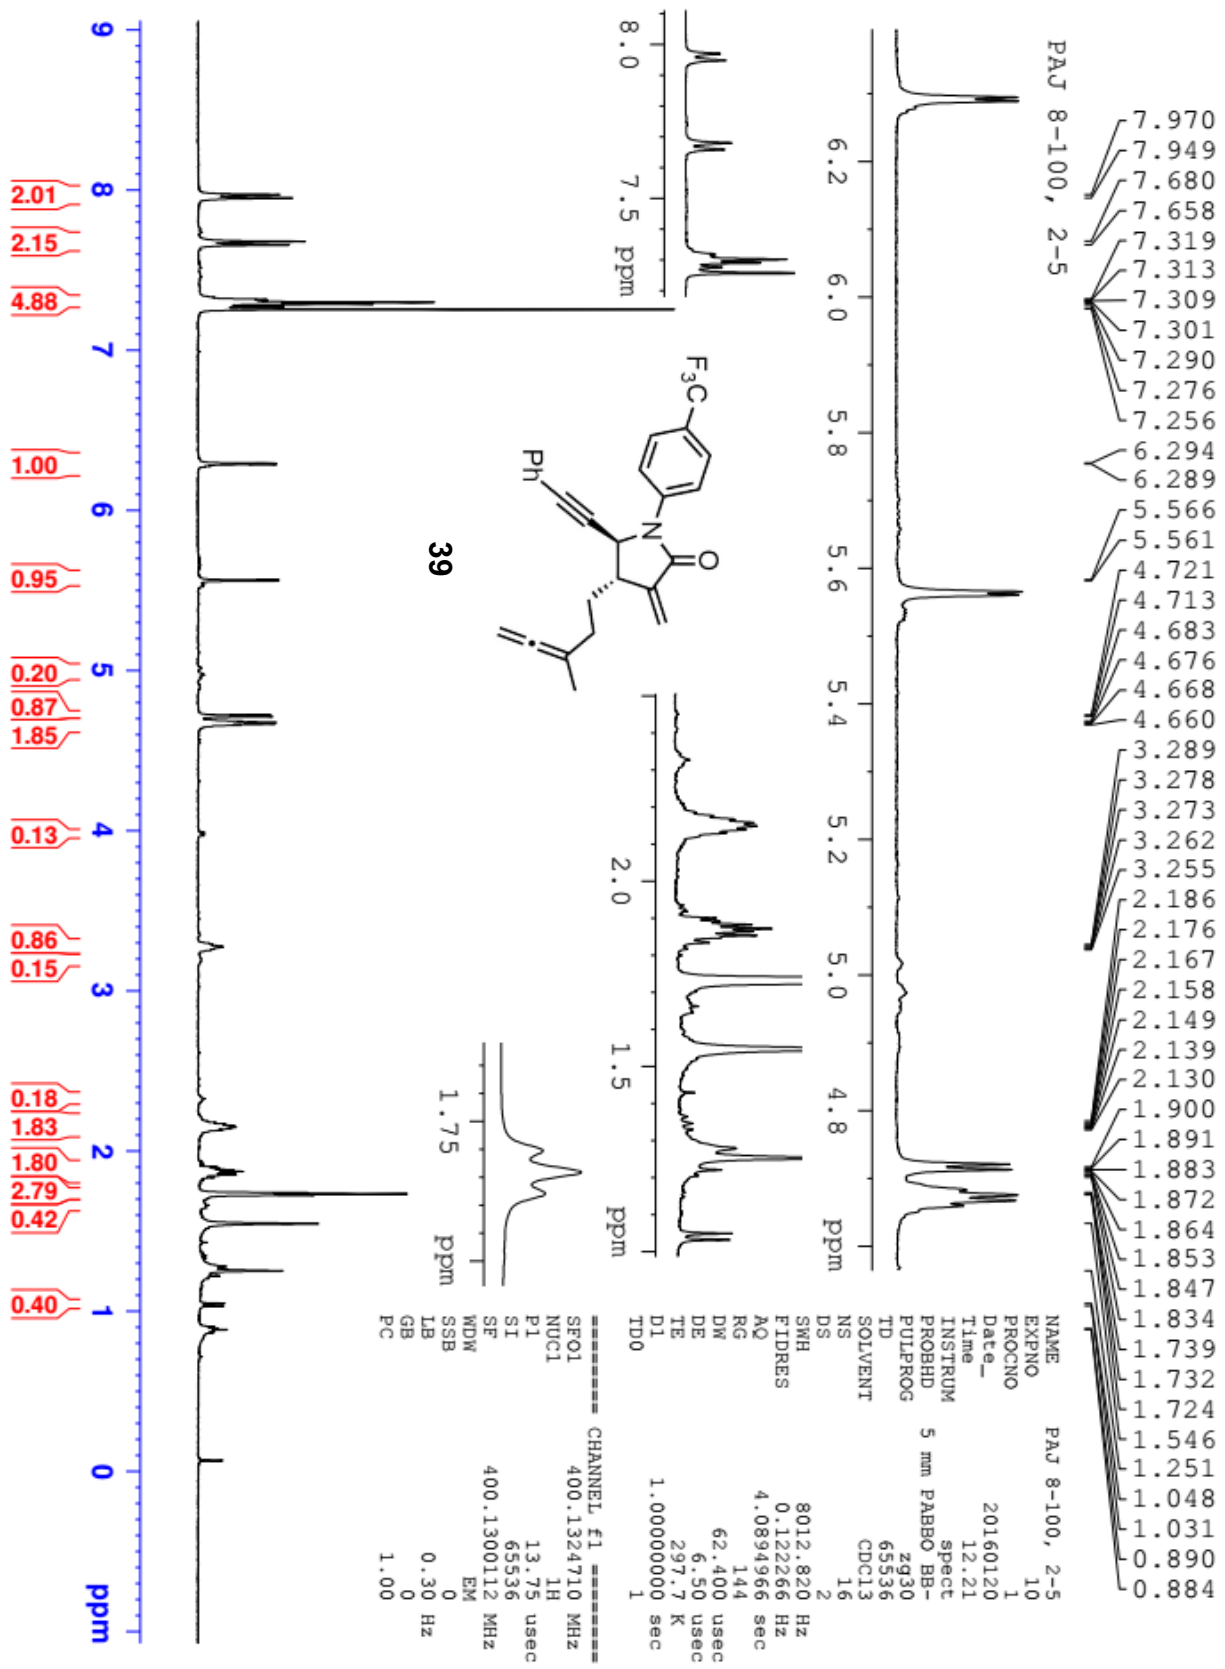

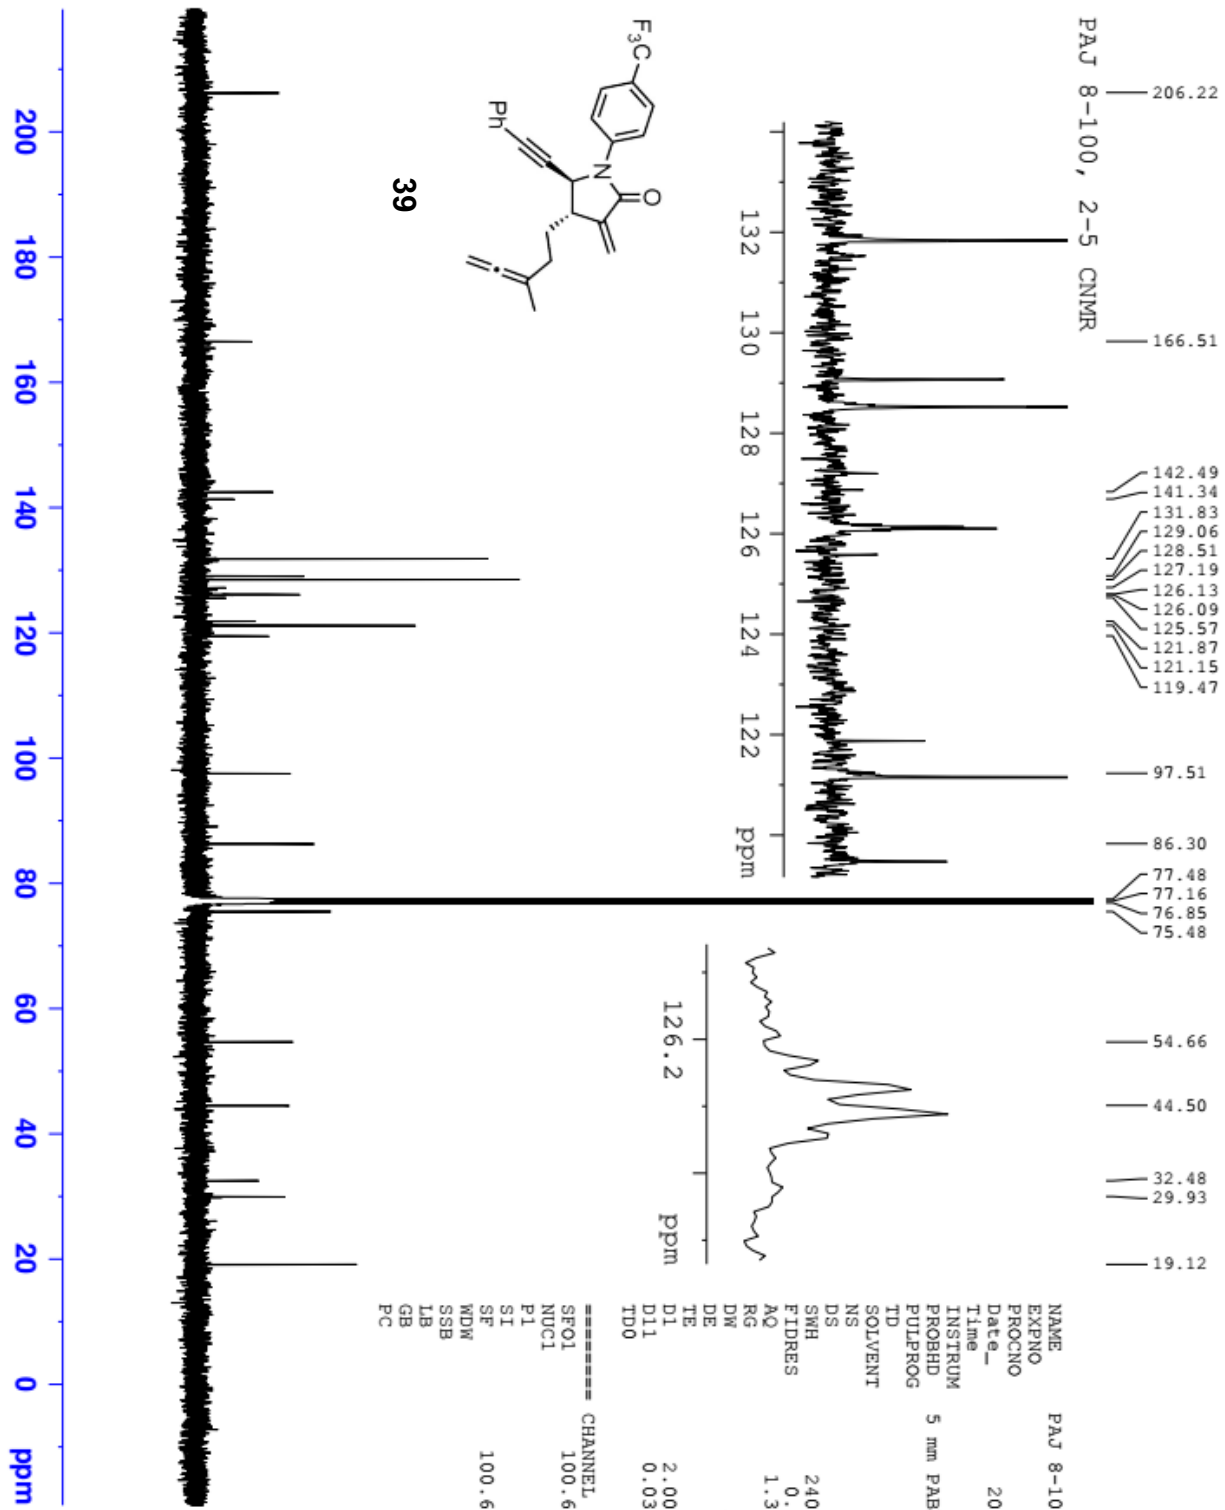

```

NAME PAJ 8-100, 2-5
EXPNO 11
PROCNO 1
Date_ 20160121
Time 4.10
INSTRUM spect
PROBHD 5 mm PABBO BB-
PULPROG zgpg30
TD 65536
SOLVENT CDCl3
NS 3000
DS 4
SWH 24038.461 Hz
FIDRES 0.366798 Hz
AQ 1.3631988 sec
RG 181
DE 20.800 usec
TE 298.1 K
D1 2.00000000 sec
D11 0.03000000 sec
TD0 1

===== CHANNEL f1 =====
SF01 100.6228293 MHz
NUC1 13C
P1 10.00 usec
SI 32768
SF 100.6127538 MHz
WDW EM
SSB 0
LB 1.00 Hz
GB 0
PC 1.40

```



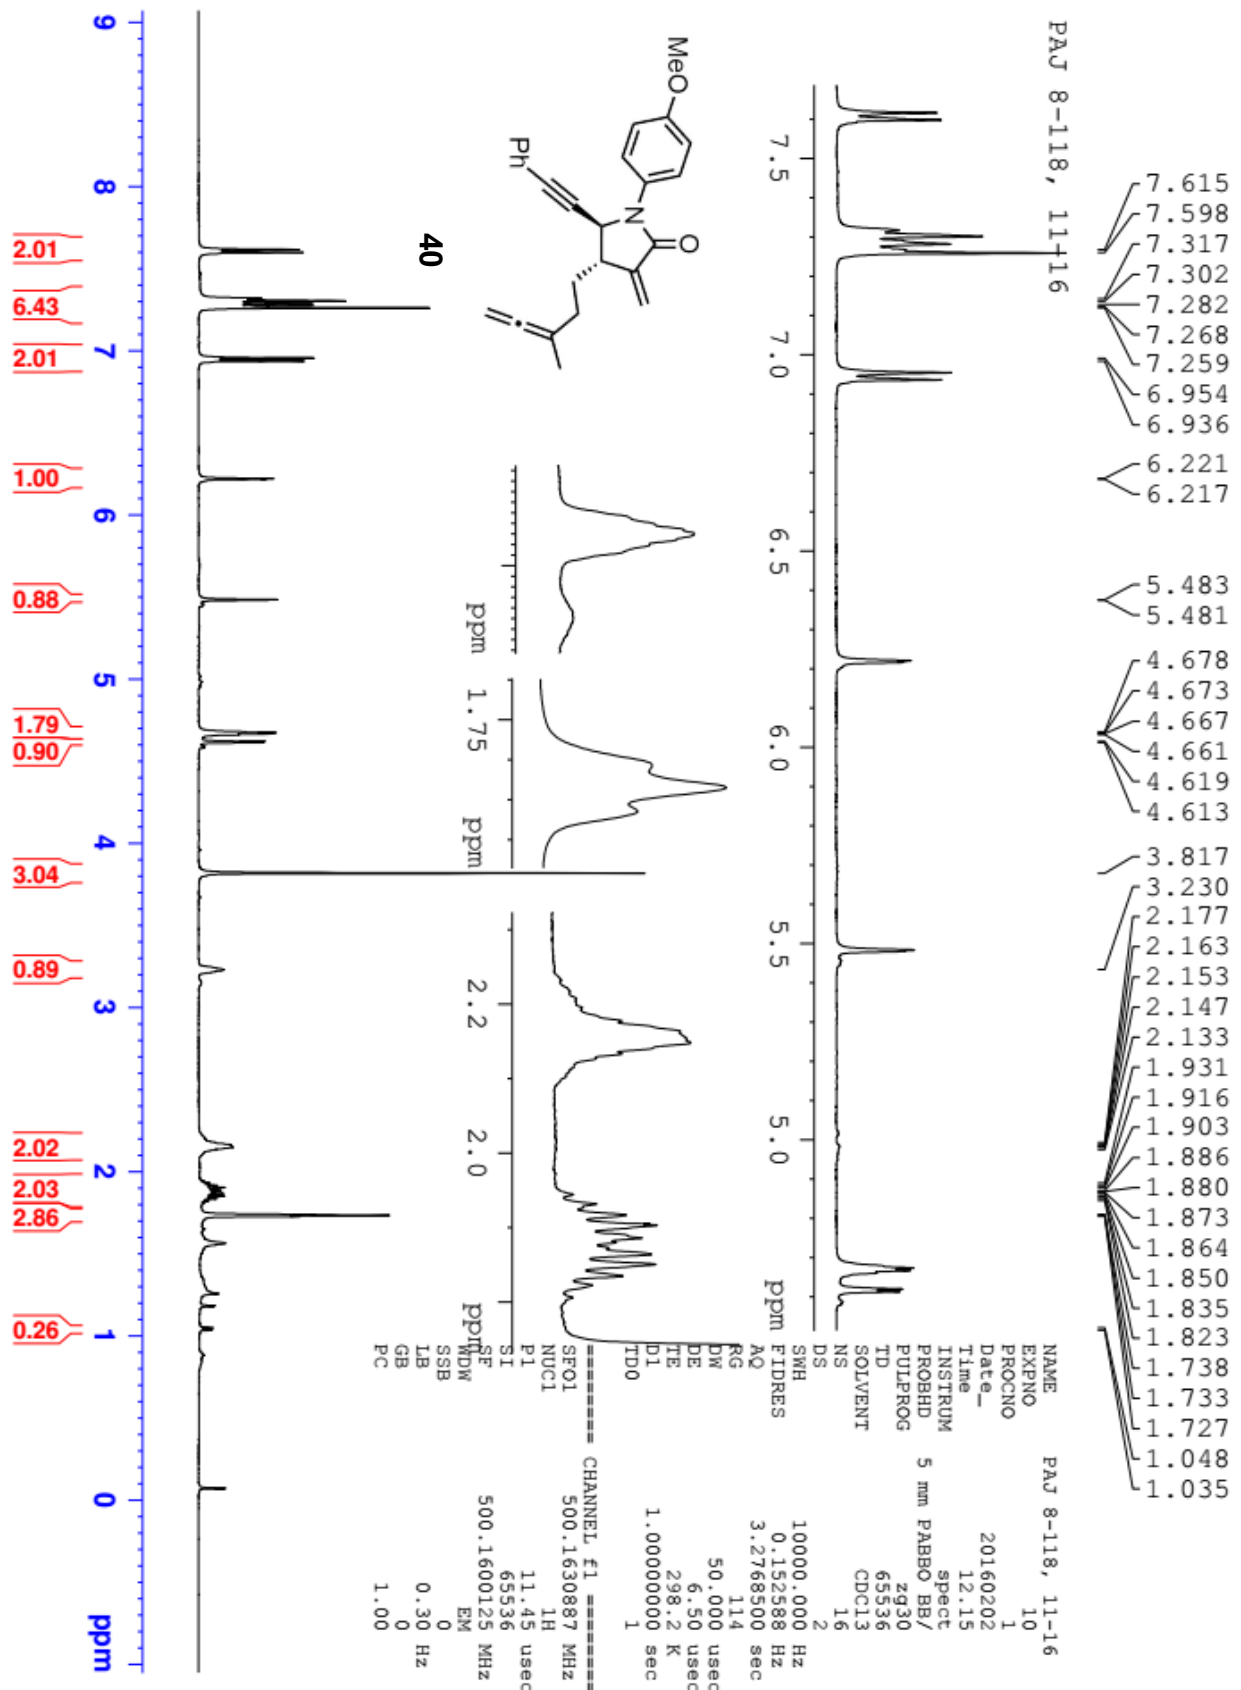

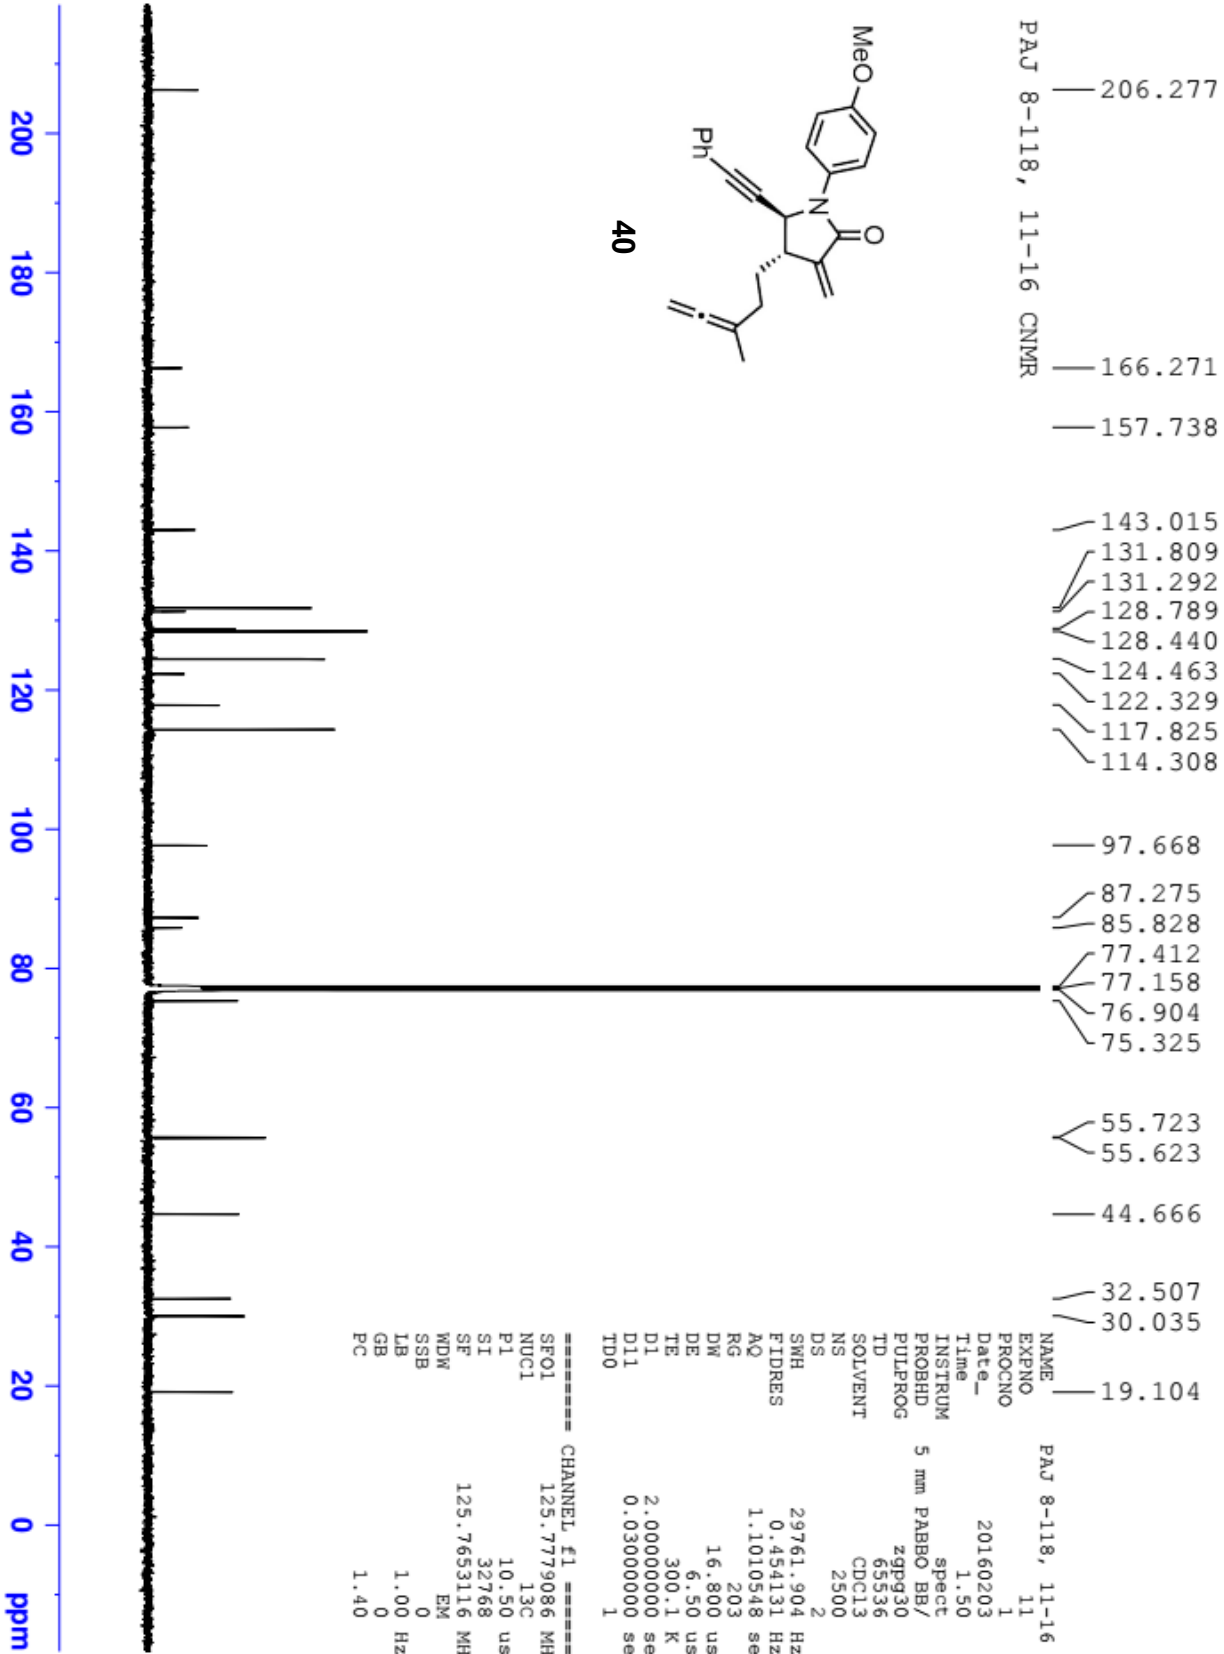

PAJ 8-206, 3-6

7.382  
7.378  
7.368  
7.363  
7.358  
7.320  
7.310  
7.303  
7.292  
7.288  
7.284  
7.259  
7.033  
7.028  
7.020  
7.016  
6.972  
6.967  
6.963  
6.950  
6.940  
6.272  
6.267  
5.547  
5.542  
4.706  
4.699  
4.679  
4.673  
4.671  
4.665  
4.663  
4.657  
3.336  
3.331  
3.324  
3.318  
3.313  
3.307  
3.300  
3.295  
2.154  
2.145  
2.136  
2.126  
2.117  
2.108  
1.869  
1.850  
1.831  
1.813  
1.738  
1.730  
1.722

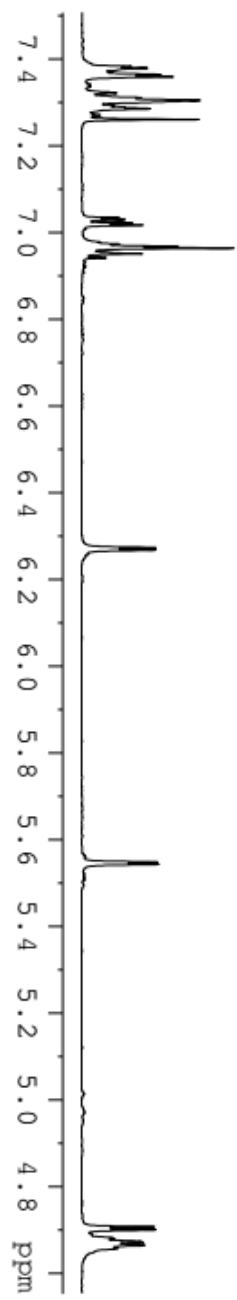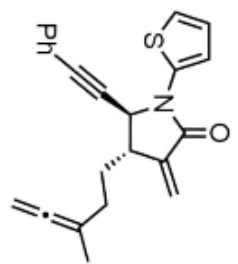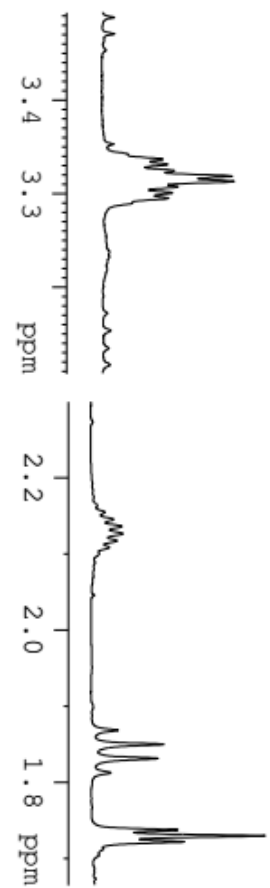

NAME PAJ 8-206, 3-6  
EXPNO 10  
PROCNO 1  
Date\_ 20160603  
Time 13.02  
INSTRUM spect  
PROBHD 5 mm PABBO BR-  
PULPROG zg30  
TD 65536  
SOLVENT CDCl3  
NS 16  
DS 2  
SWH 8012.820 Hz  
FIDRES 0.122266 Hz  
AQ 4.0894966 sec  
RG 90.5  
DW 62.400 usec  
DE 6.50 usec  
TE 96.3 K  
D1 1.00000000 sec  
TD0 1

===== CHANNEL f1 =====  
SFO1 400.1324710 MHz  
NUC1 1H  
P1 13.75 usec  
SI 65536  
SF 400.1300102 MHz  
WDW EM  
SSB 0  
LB 0.30 Hz  
GB 0  
PC 1.00

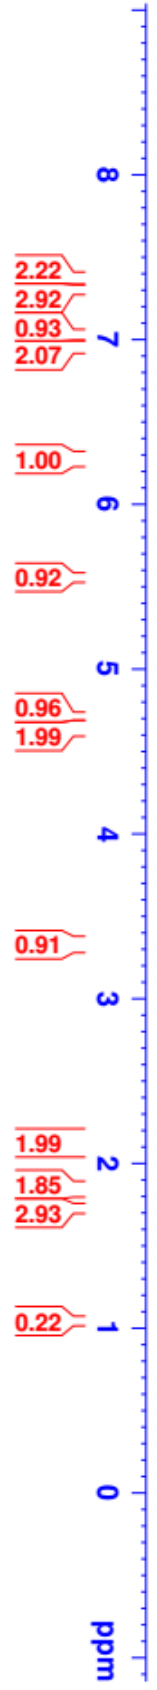

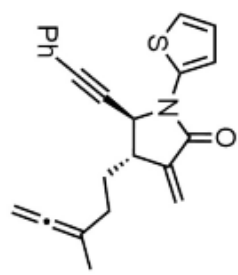

42

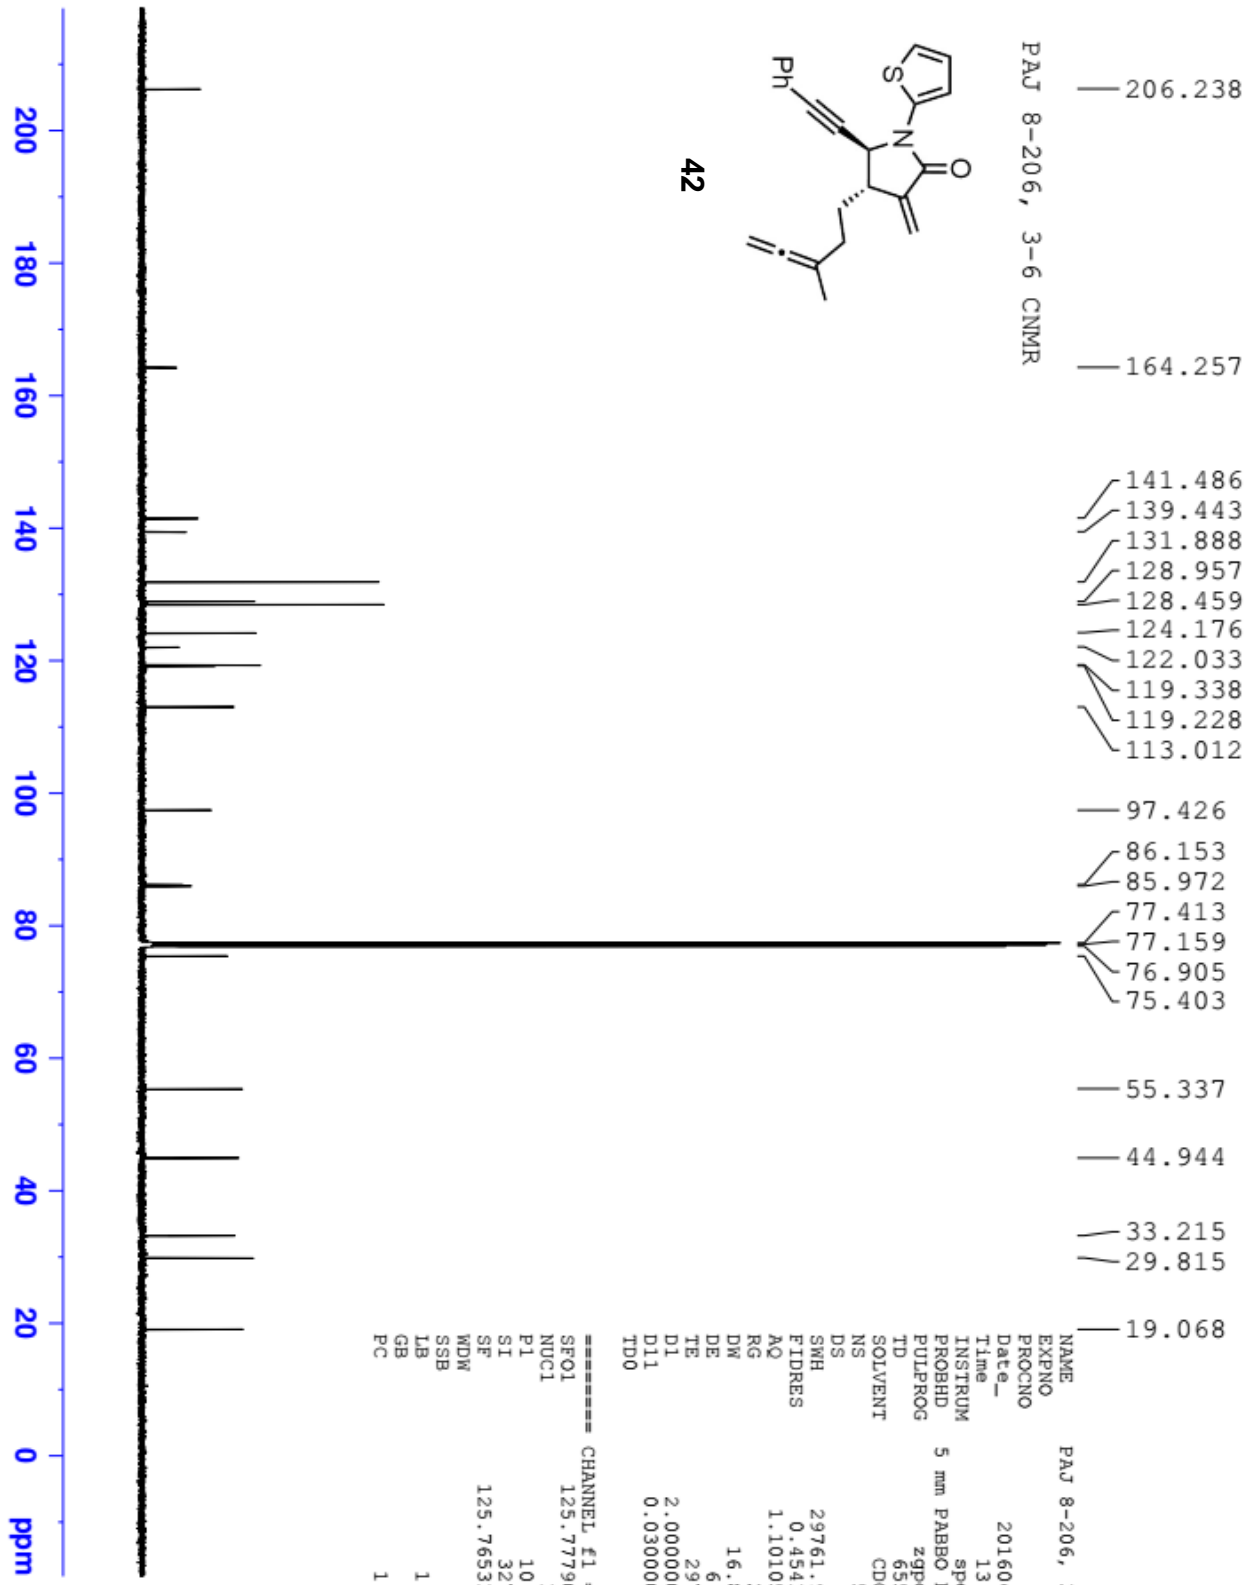

PAJ 8-206, 3-6 CNMR

- 206.238
- 164.257
- 141.486
- 139.443
- 131.888
- 128.957
- 128.459
- 124.176
- 122.033
- 119.338
- 119.228
- 113.012
- 97.426
- 86.153
- 85.972
- 77.413
- 77.159
- 76.905
- 75.403
- 55.337
- 44.944
- 33.215
- 29.815
- 19.068

```

NAME          PAJ 8-206, 3-6
EXPNO         10
PROCNO        1
Date_         20160603
Time          13.49
INSTRUM       5 mm PABBO BB/
PROBHD        zgpg30
PULPROG       65536
TD            CDCL3
SOLVENT       500
NS            2
DS            2
SWH           29761.904 Hz
FIDRES        0.454131 Hz
AQ            1.1010548 sec
RG            203
DW            16.800 usec
DE            6.50 usec
TE            297.1 K
D1            2.00000000 sec
D11           0.03000000 sec
TD0           1

===== CHANNEL f1 =====
SFO1          125.7779086 MHz
NUC1          13C
P1            10.50 usec
SI            32768
SF            125.7653156 MHz
WDW           EM
SSB           0
LB            1.00 Hz
GB            0
PC            1.40
  
```

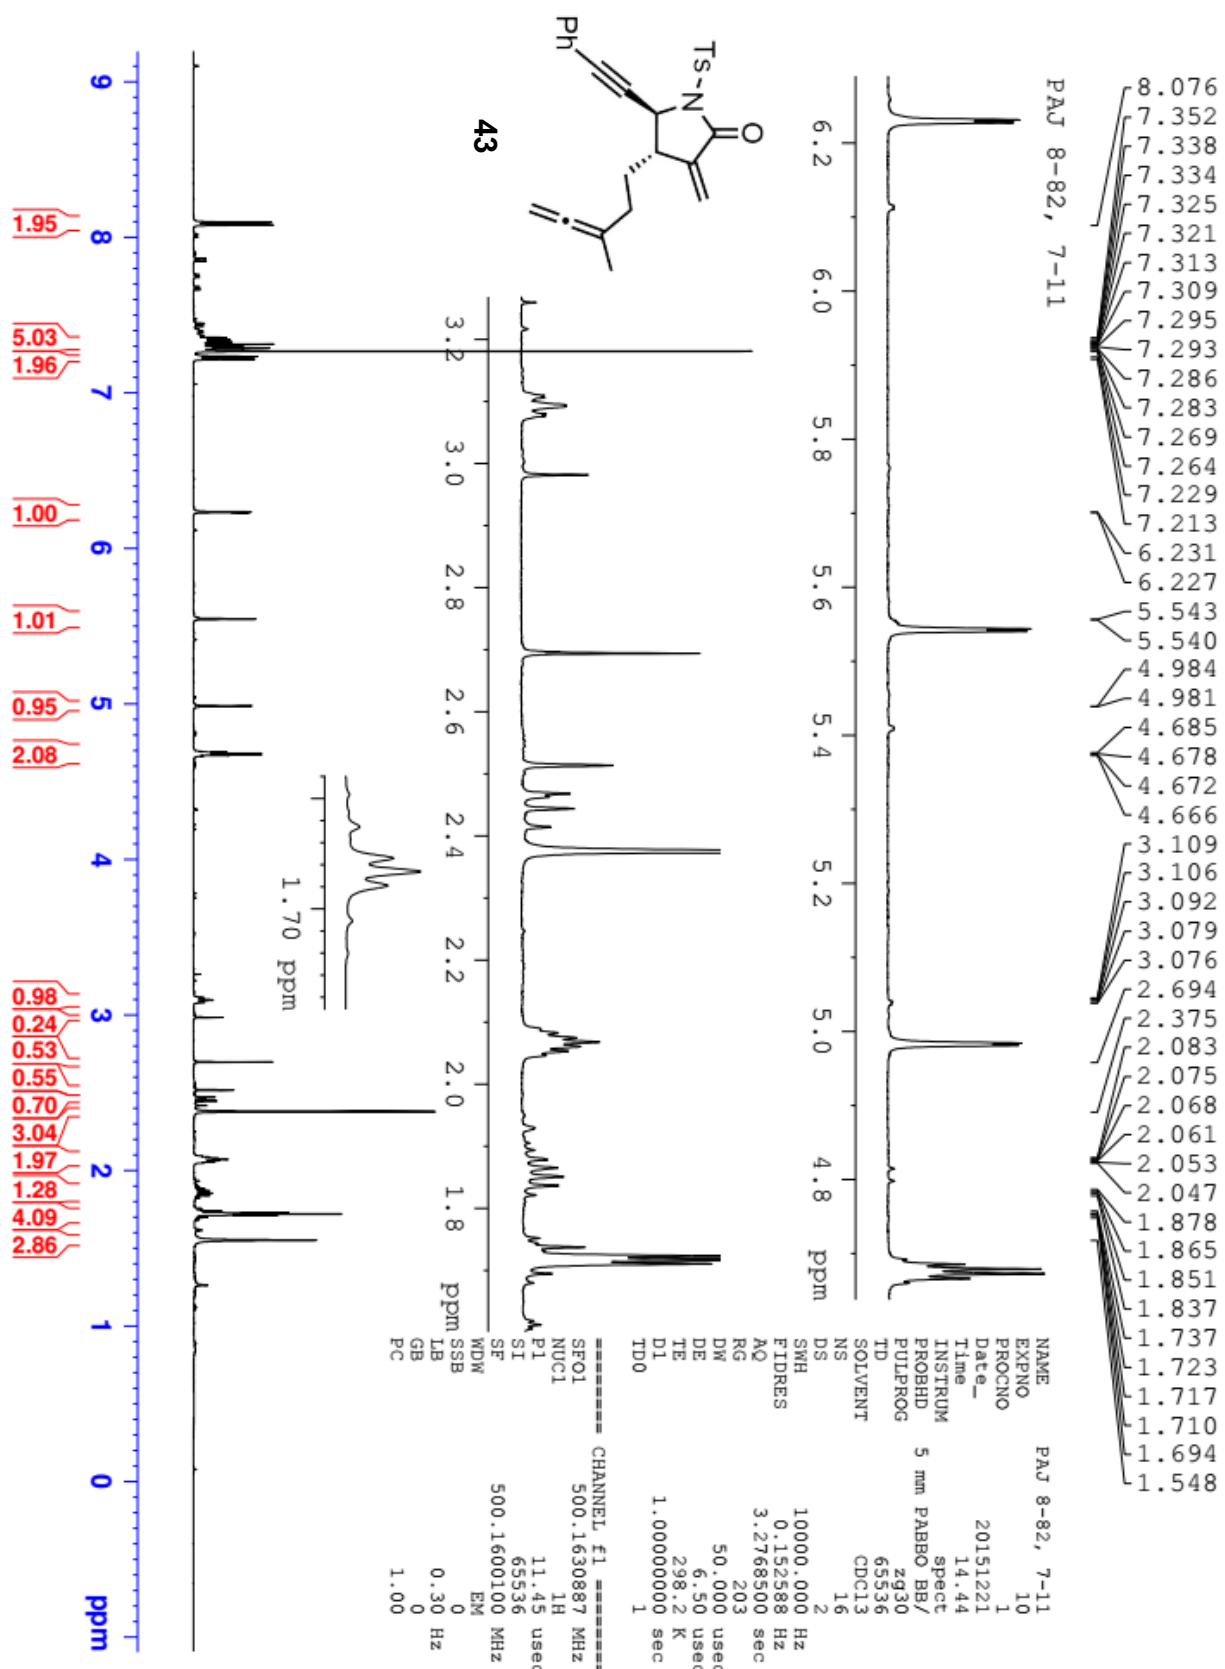

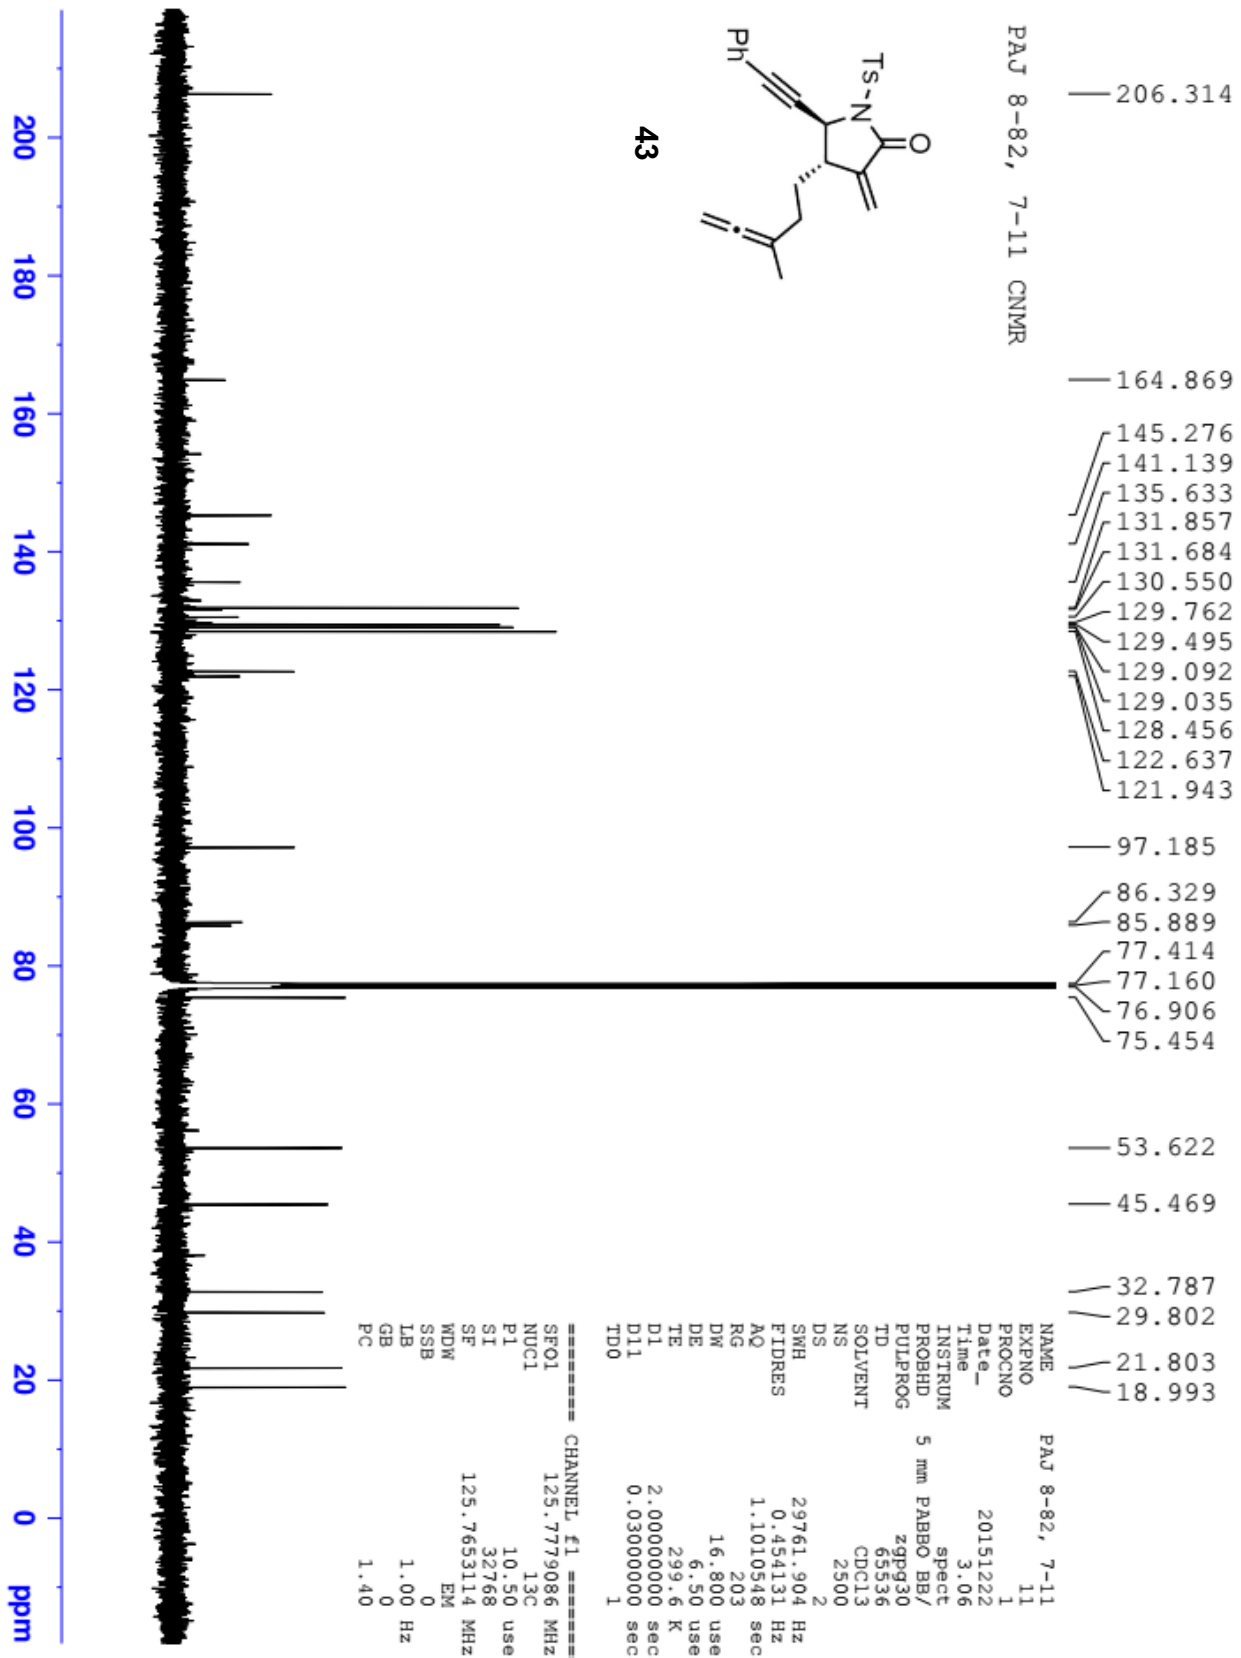

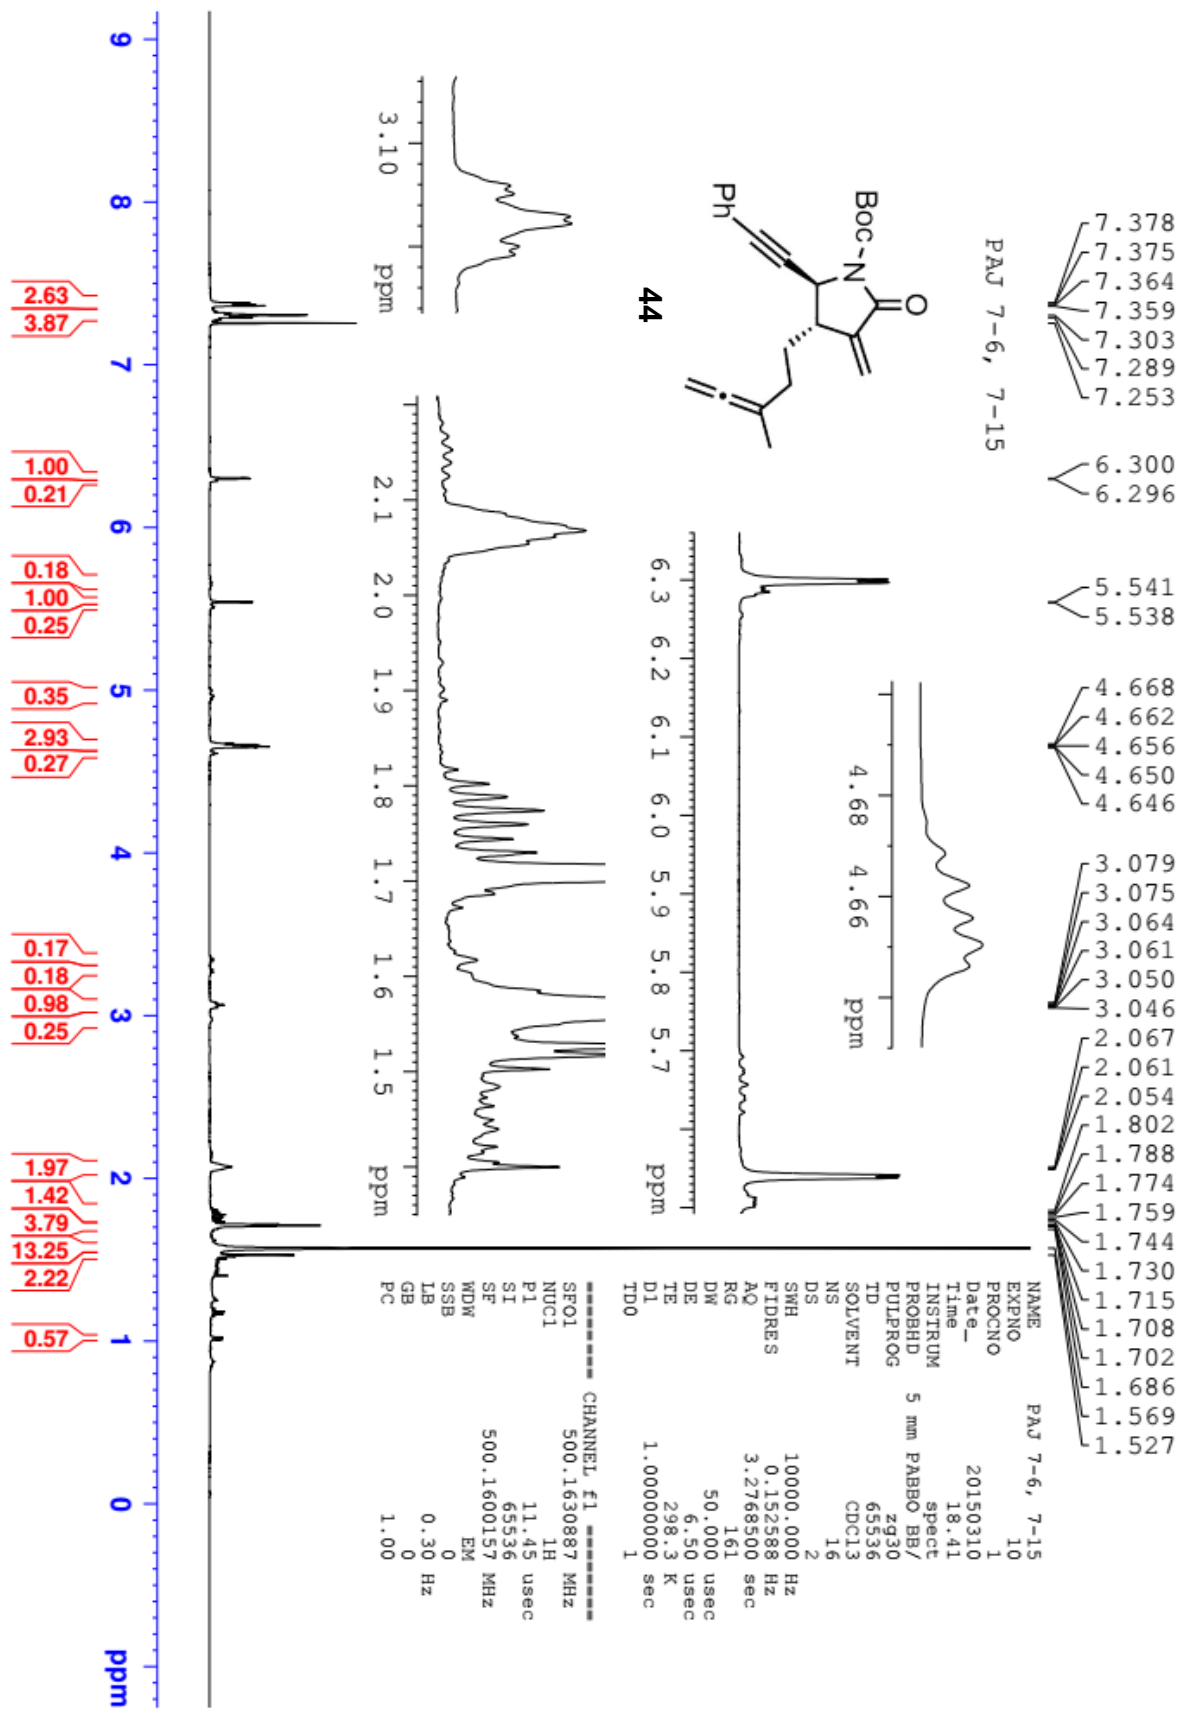

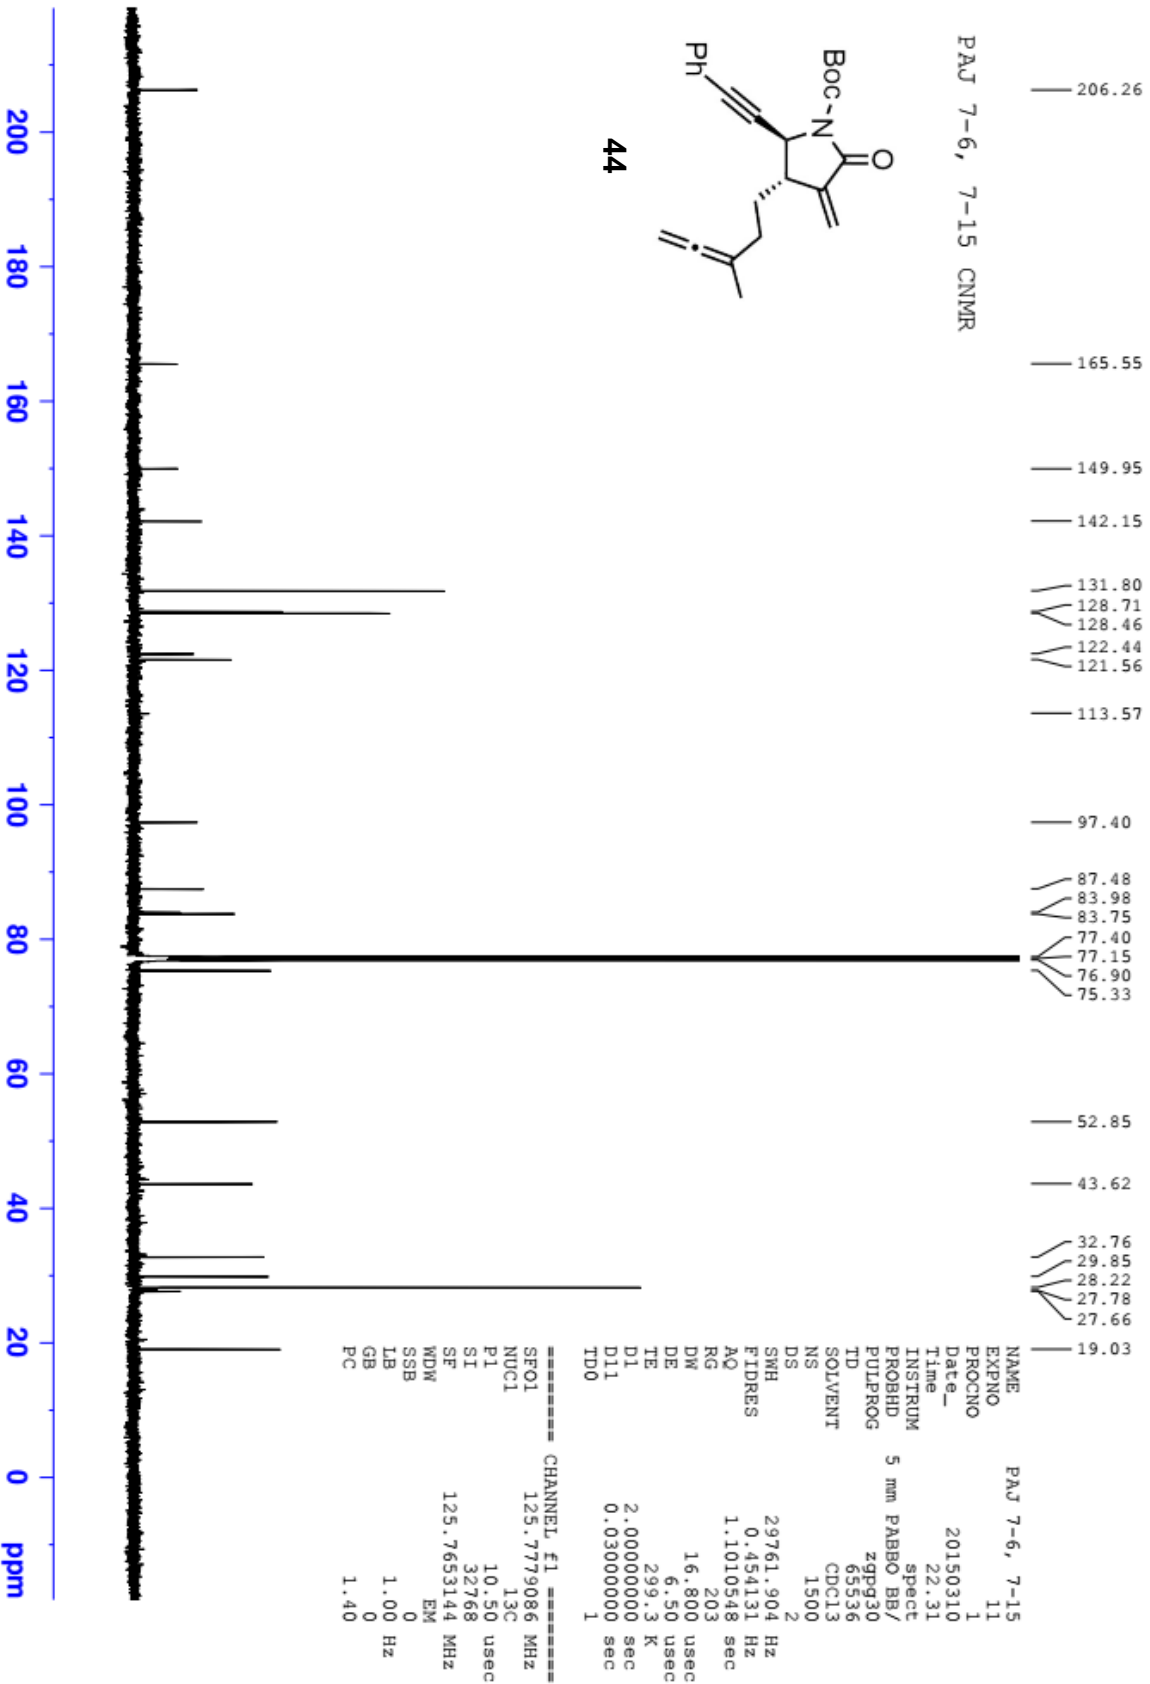



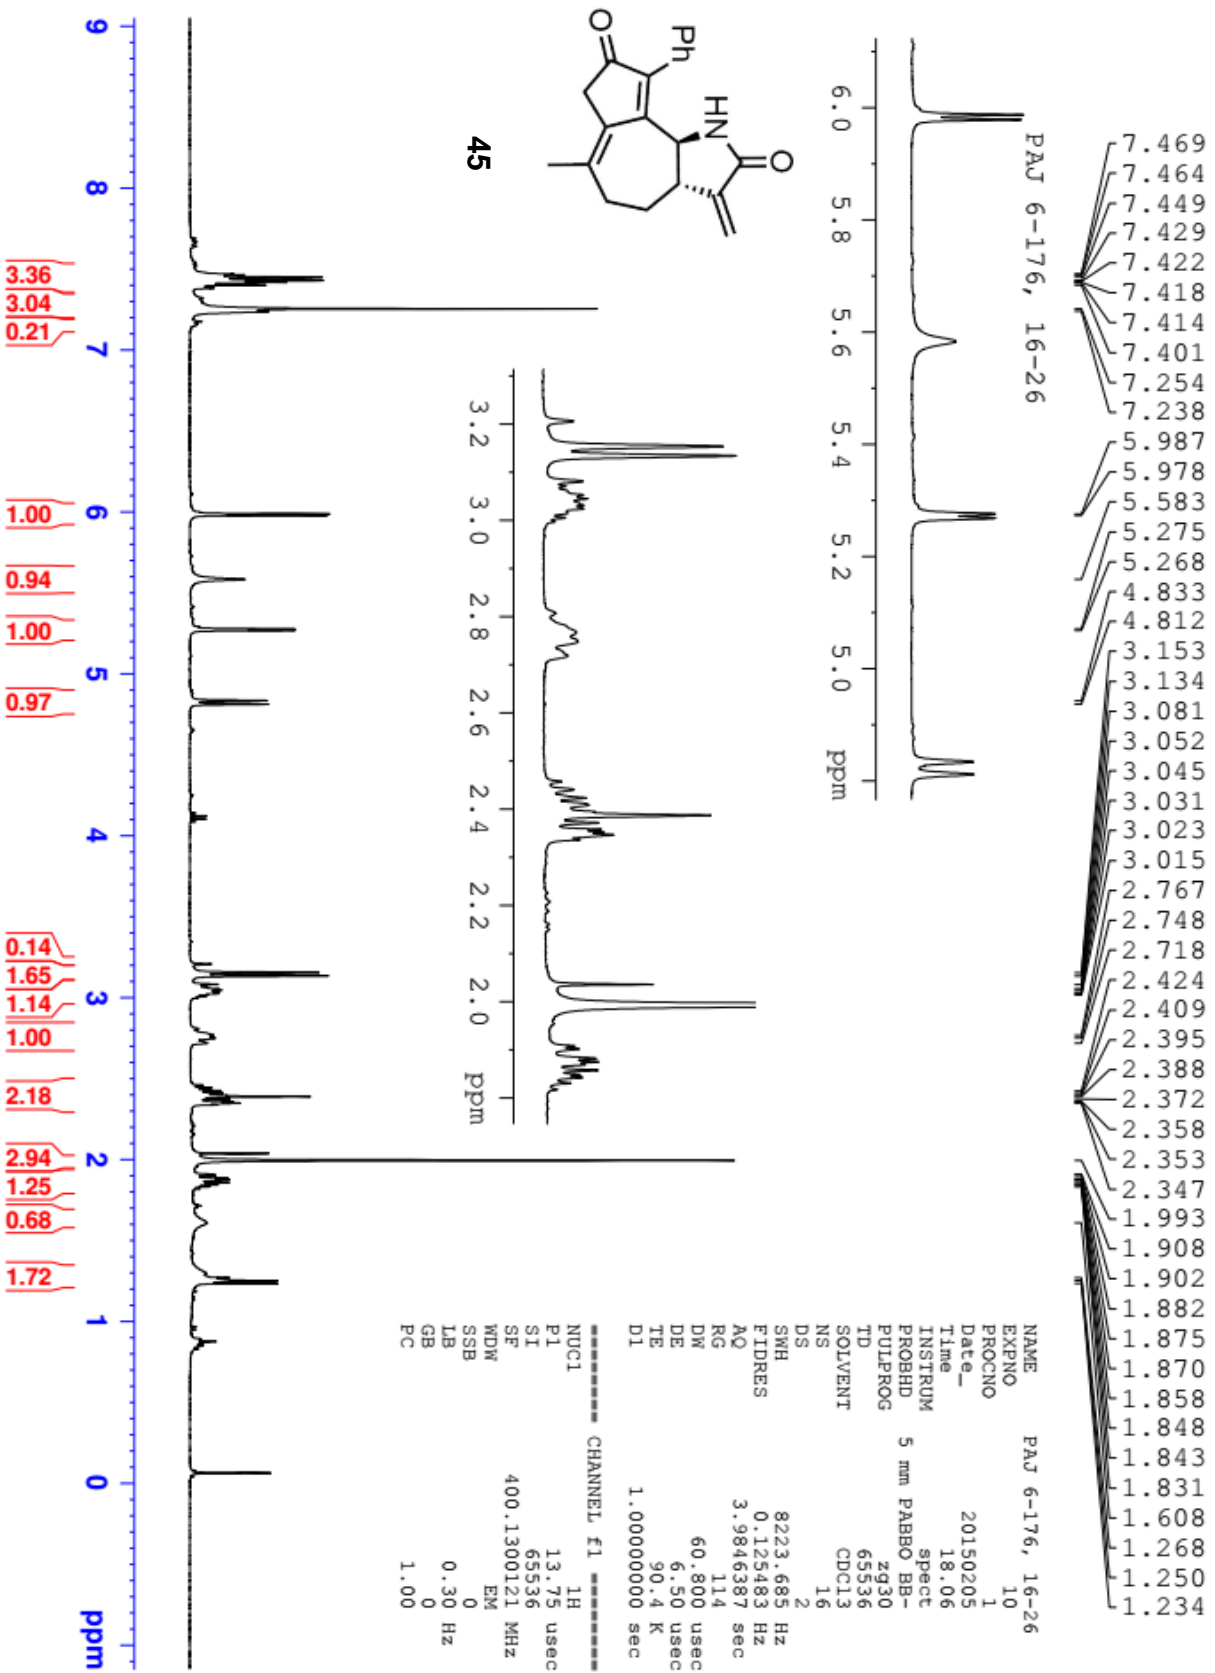

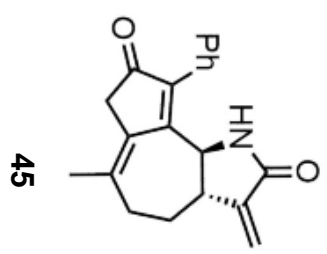

PAJ 6-176, 16-26 CNMR

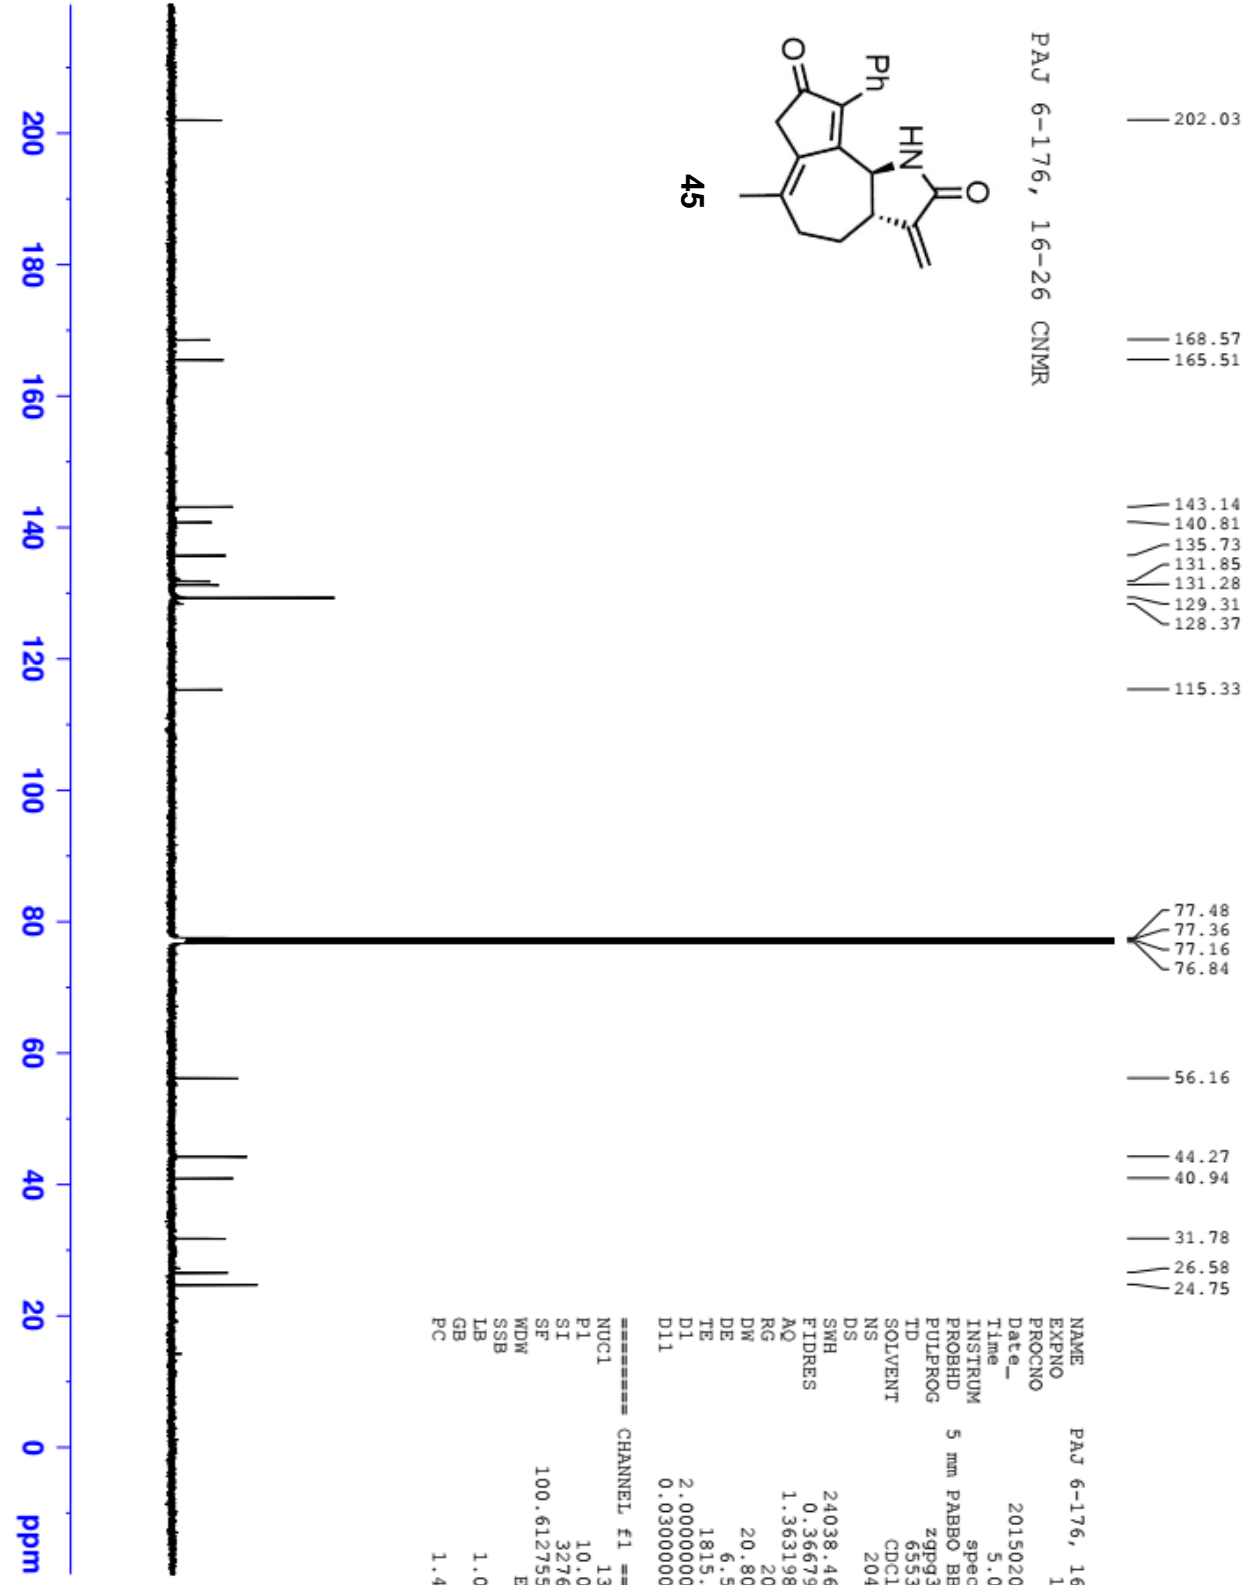

```

NAME          PAJ 6-176, 16-26
EXPNO         11
PROCNO        1
Date_         20150206
Time          5.08
INSTRUM       spect
PROBHD        5 mm PABBO BH-
PULPROG       zgpg30
TD            65536
SOLVENT       CDCl3
NS            2048
DS            4
SWH           24038.461 Hz
FIDRES        0.366798 Hz
AQ            1.3631988 sec
RG            203
DW            20.800 usec
DE            6.50 usec
TE            1815.7 K
D1            2.00000000 sec
D11           0.03000000 sec

===== CHANNEL f1 =====
NUC1          13C
P1            10.00 usec
SI            32768
SF            100.6127550 MHz
WDW           EM
SSB           0
LB            1.00 Hz
GB            0
PC            1.40
  
```

PAJ 7-78, 32-43

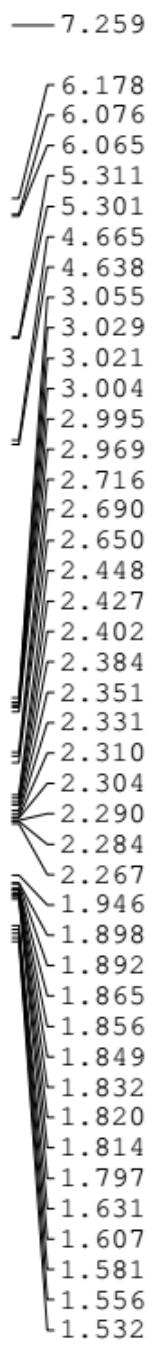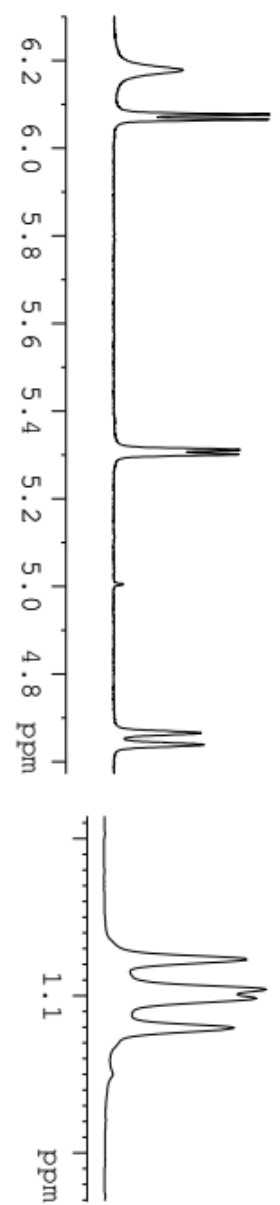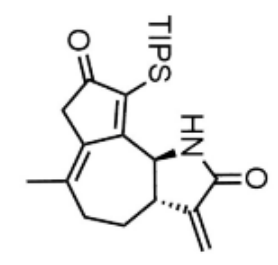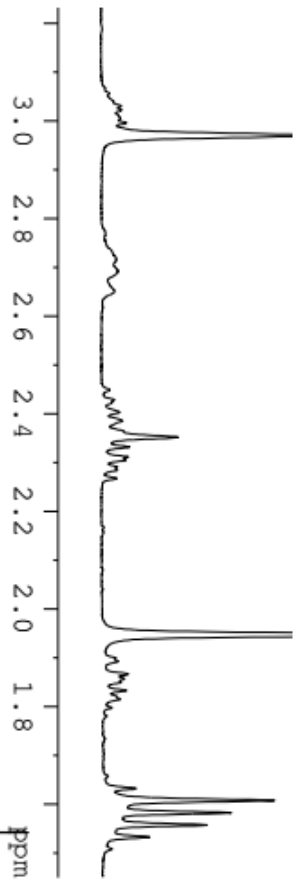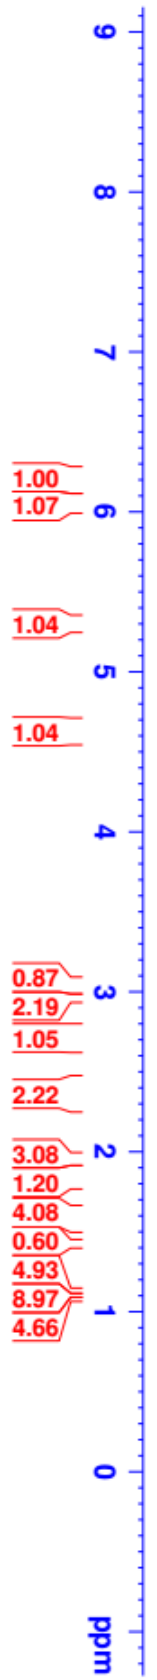

```

NAME      PAJ 7-78, 32-43
EXPNO    10
PROCNO   1
Date_    20150514
Time     17.13
INSTRUM  spect
PROBHD   1H/1
PULPROG  zg30
TD        32768
SOLVENT  CDCl3
NS        16
DS        2
SWH       6188.119 Hz
FIDRES    0.188846 Hz
AQ        2.6477044 sec
RG        144
DW        80.800 usec
DE        6.50 usec
TE        -927.7 K
D1        1.00000000 sec
TD0       1

===== CHANNEL f1 =====
SFO1     300.2318540 MHz
NUC1     1H
P1       12.71 usec
SI       32768
SF       300.2300091 MHz
WDW      EM
SSB      0
LB       0.10 Hz
GB       0
PC       1.00
  
```

208.24  
 179.92  
 169.34  
 143.11  
 137.93  
 134.11  
 133.85  
 115.73  
 77.46  
 77.14  
 76.82  
 56.83  
 44.20  
 41.43  
 31.92  
 27.09  
 25.36  
 19.52  
 19.42  
 13.01

PAJ 7-78, 23-43 CNMR

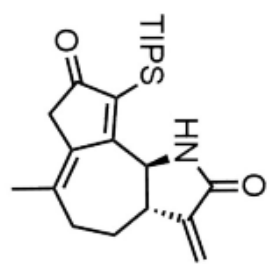

46

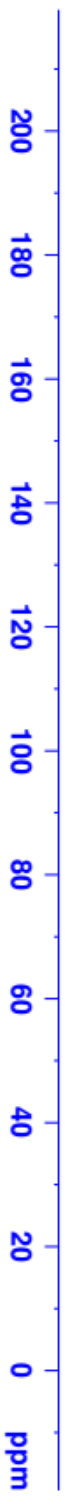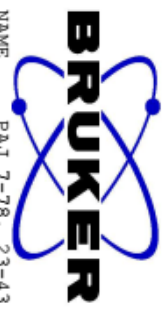

PAJ 7-78, 23-43

```

NAME PAJ 7-78, 23-43
EXPNO 11
PROCNO 1
Date_ 20150516
Time 2.11
INSTRUM spect
PROBHD 5 mm PABBO BB-
PULPROG zgpg30
TD 65536
SOLVENT CDCl3
NS 3000
DS 4
SWH 24038.461 Hz
FIDRES 0.366798 Hz
AQ 1.3631988 sec
RG 144
DE 20.800 usec
TE 1515.8 K
D1 2.00000000 sec
D11 0.03000000 sec

===== CHANNEL f1 =====
NUC1 13C
P1 10.00 usec
SI 32768
SF 100.6127570 MHz
WDW EM
SSB 0
LB 1.00 Hz
GB 0
PC 1.40
  
```

PAJ 8-60, 2

7.544  
7.476  
7.248

6.108  
6.064  
6.057  
5.318  
5.313  
4.587  
4.570  
2.999  
2.856  
2.848  
2.838  
2.821  
2.759  
2.737  
2.706  
2.416  
2.412  
2.400  
2.389  
2.376  
2.373  
2.367  
2.353  
2.340  
2.326  
2.321  
2.314  
2.309  
1.937  
1.922  
1.912  
1.908  
1.901  
1.895  
1.888  
1.881  
1.866

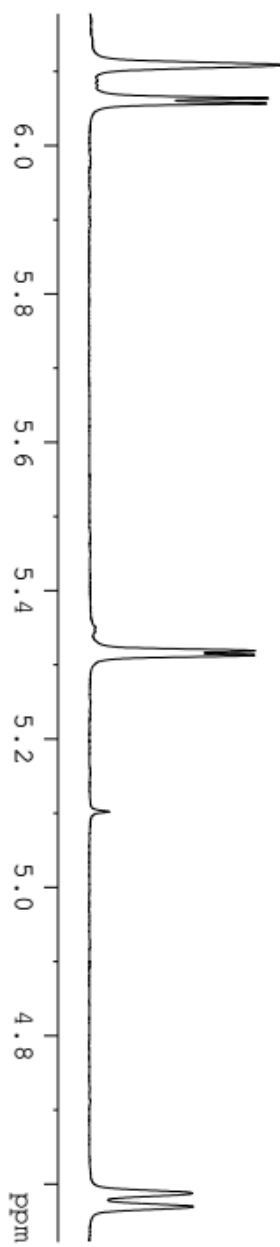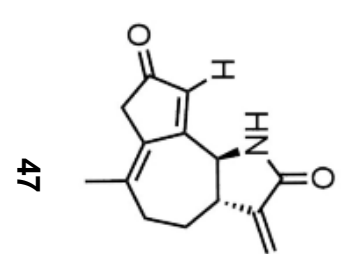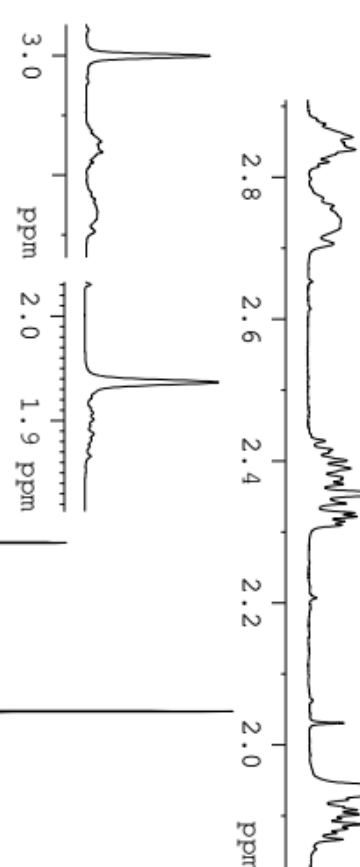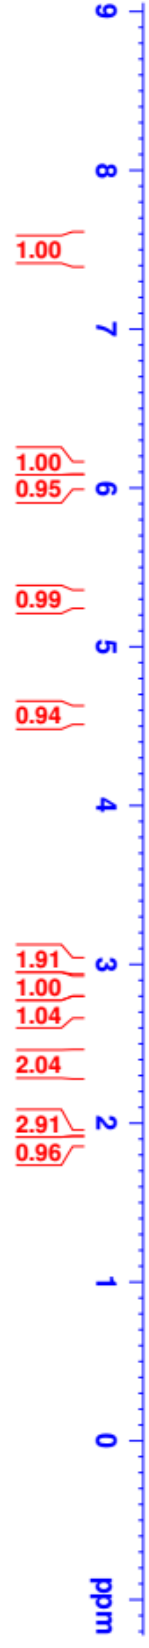

```

NAME          PAJ 8-60, 2
EXPNO         10
PROCNO        1
Date_         20151208
Time          12.09
INSTRUM       spect
PROBHD        5 mm PABBO BB/
PULPROG       zg30
TD            65536
SOLVENT       CDCl3
NS            16
DS            2
SMH           10000.000 Hz
FIDRES        0.152588 Hz
AQ            3.2768500 sec
RG            203
DW            50.000 usec
DE            6.50 usec
TE            298.3 K
D1            1.00000000 sec
TD0           1

===== CHANNEL f1 =====
SF01          500.1630887 MHz
NUC1          1H
P1            11.45 usec
SI            65536
SF           500.1600172 MHz
WDW           EM
SSB           0
LB            0.30 Hz
GB            0
PC            1.00
  
```

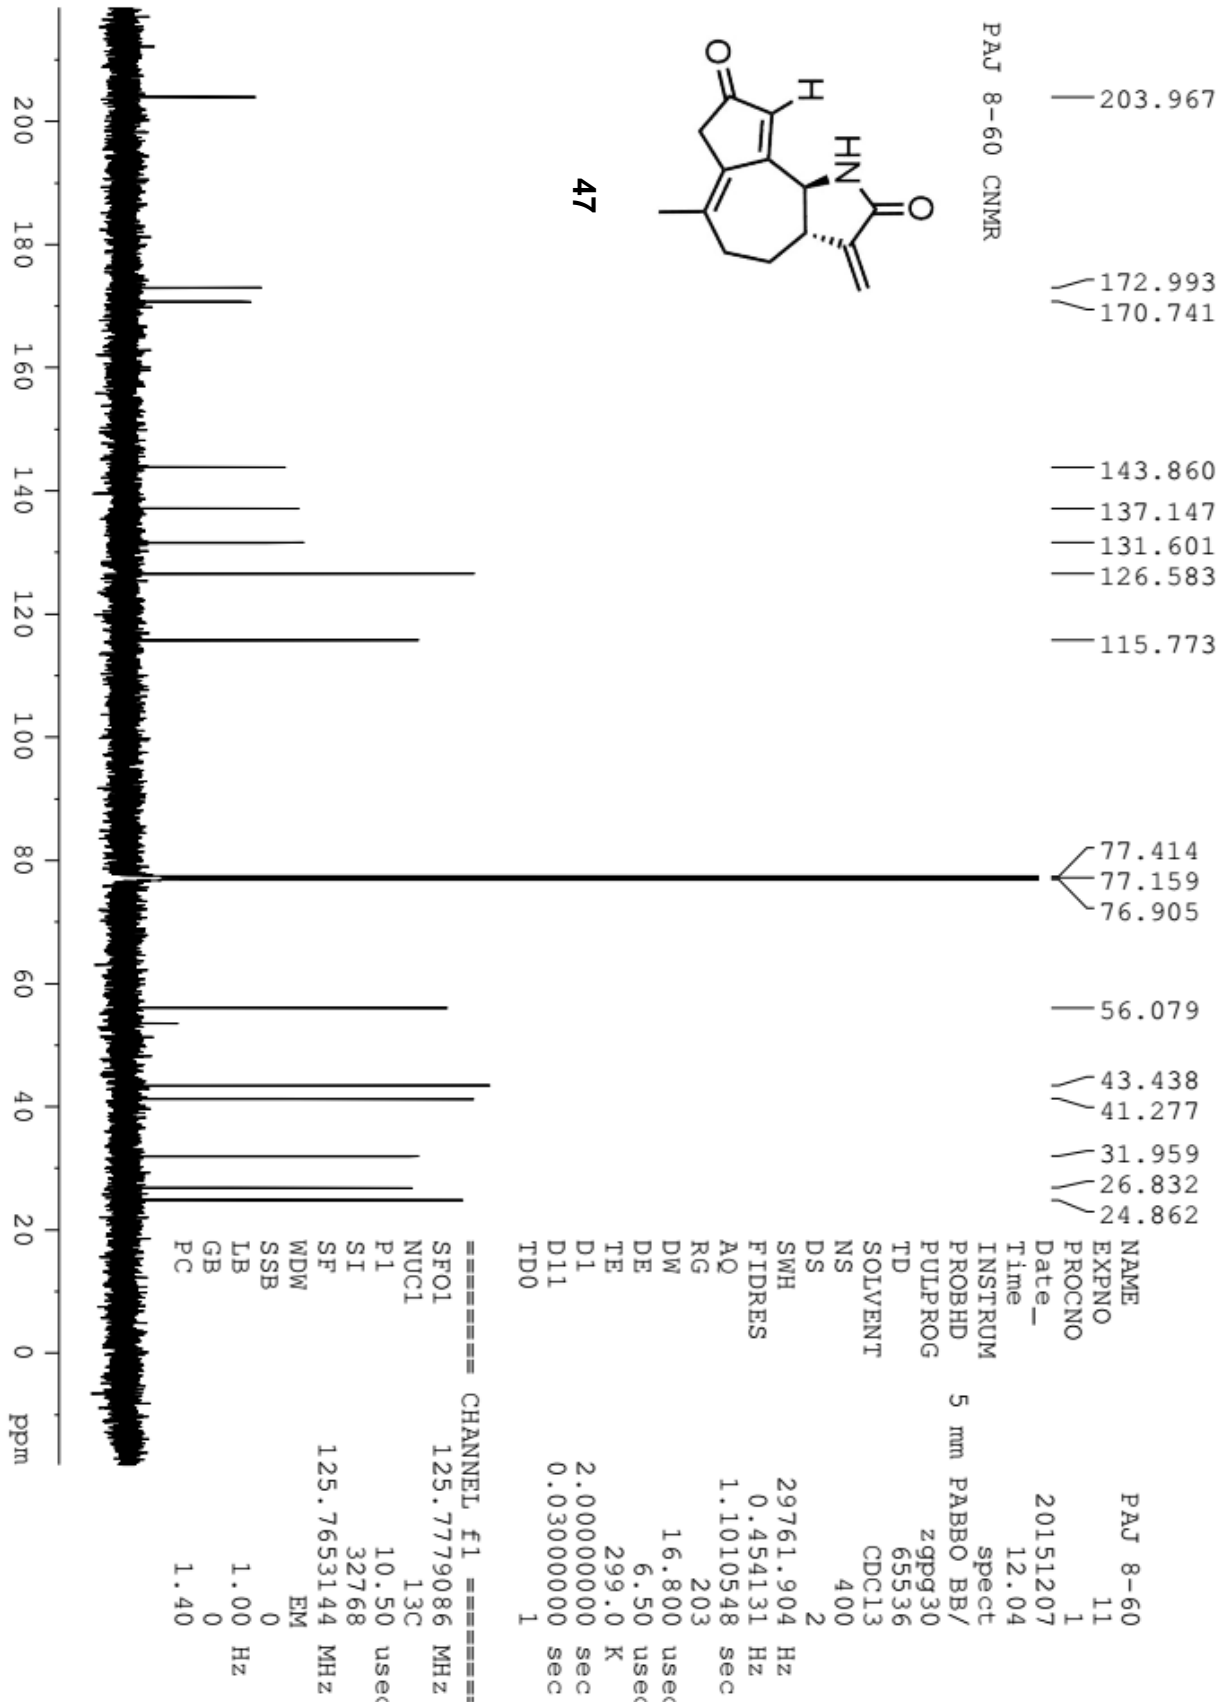

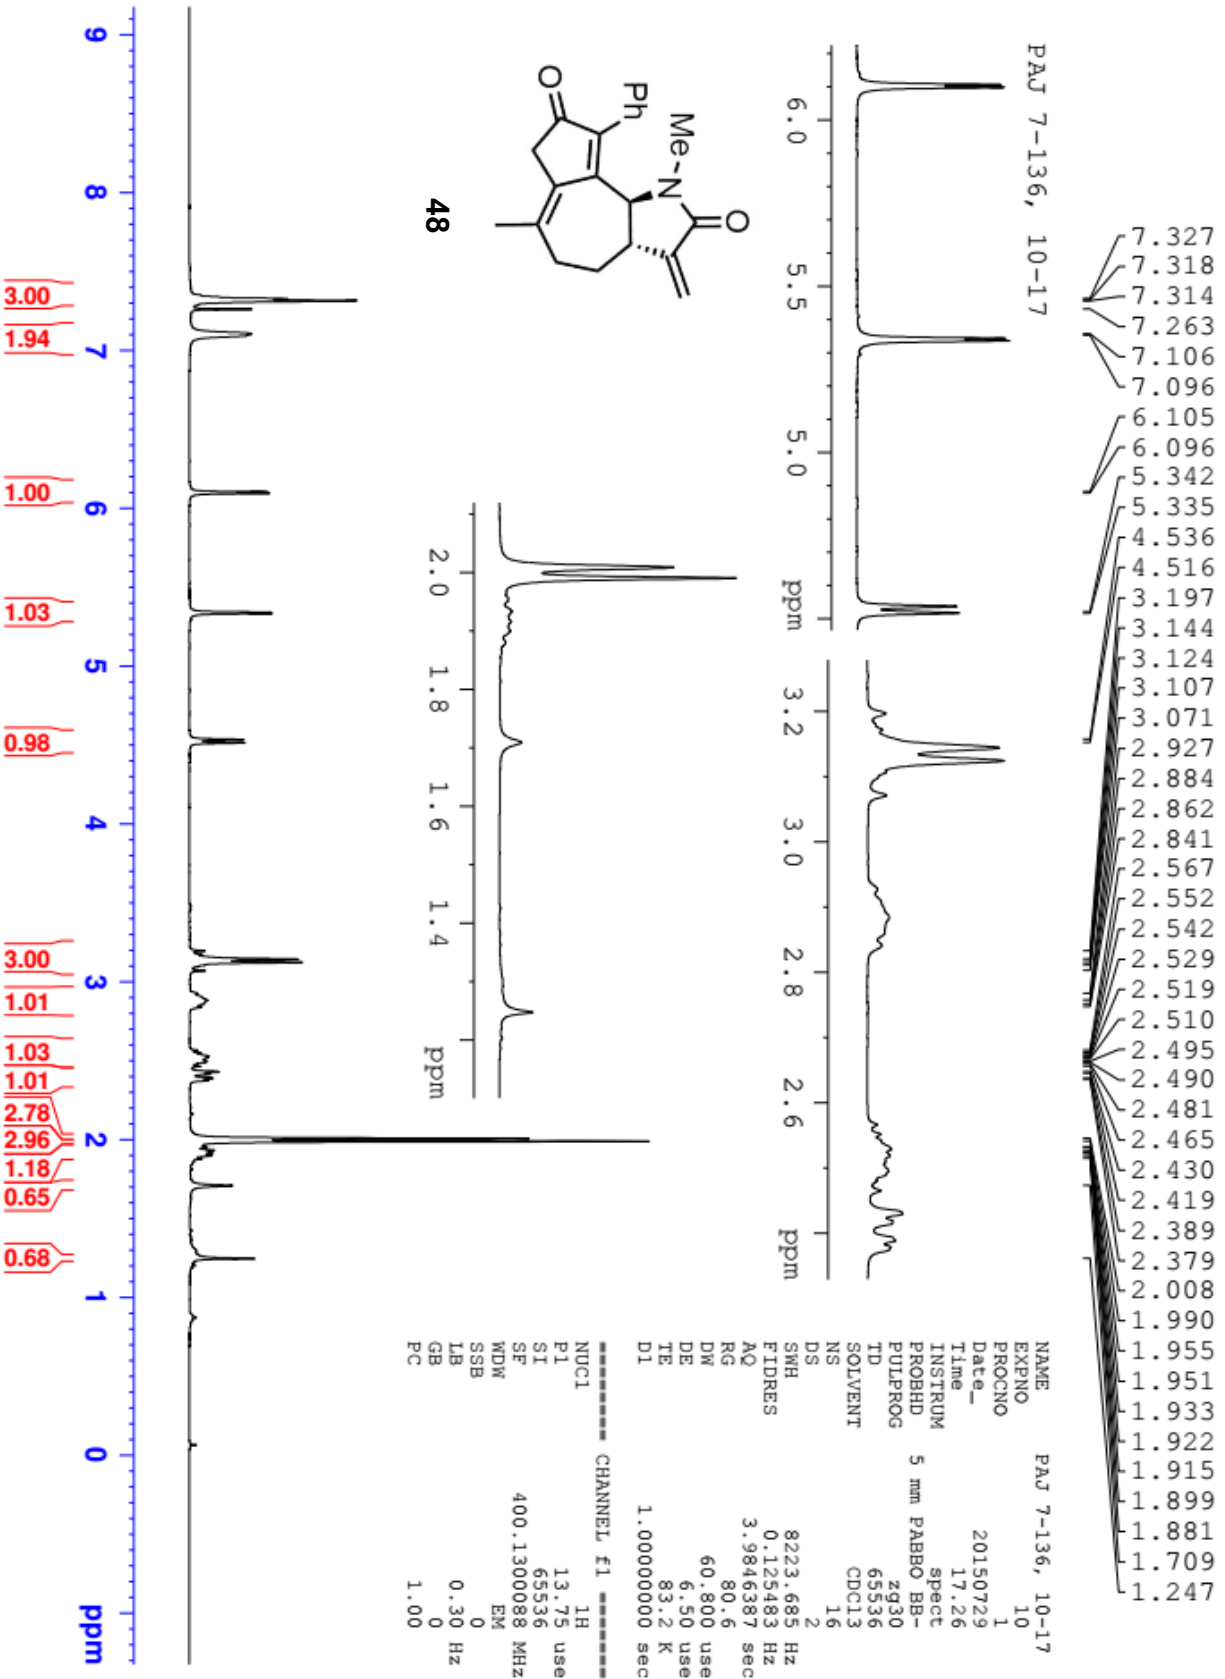

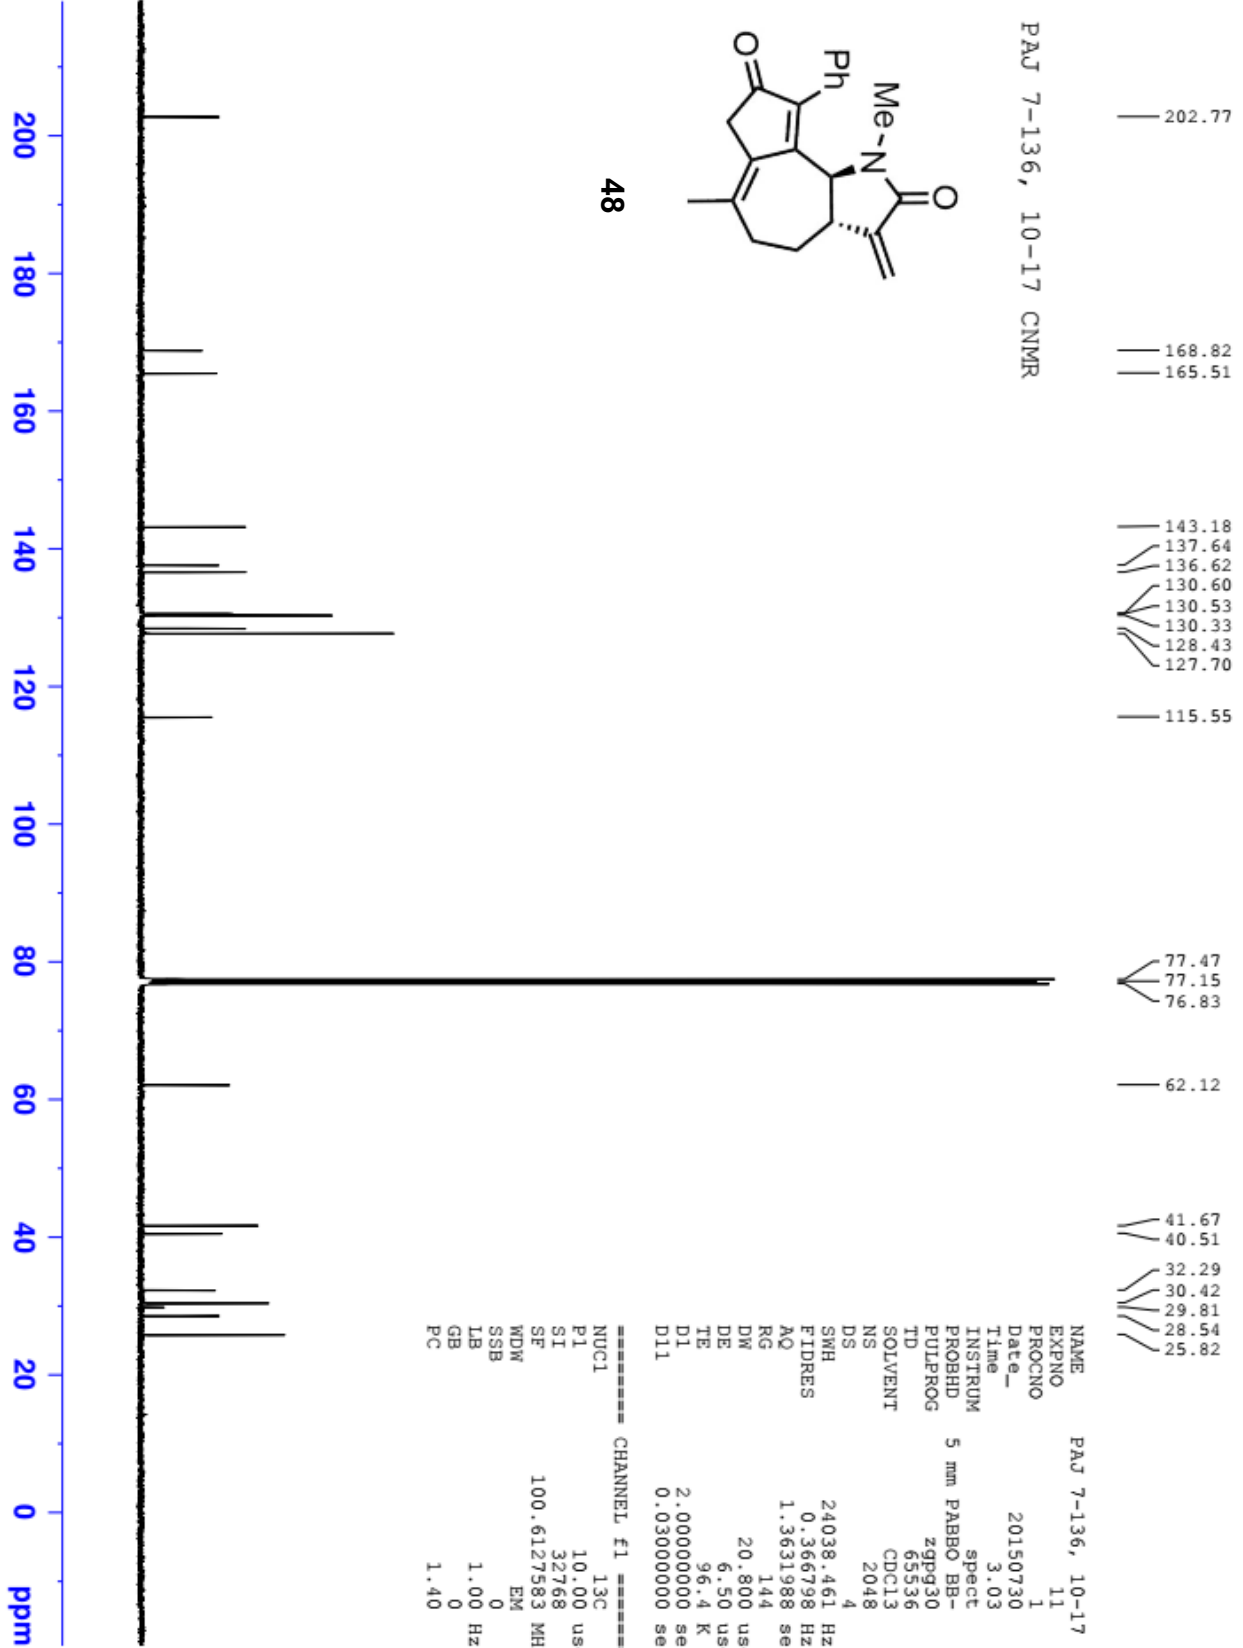

PAJ 7-136, 10-17 CNMR

48

```

NAME      PAJ 7-136, 10-17
EXPNO    11
PROCNO   1
Date_    20150730
Time     3.03
INSTRUM  spect
PROBHD   5 mm PABBO BB-
PULPROG  zgpg30
TD        65536
SOLVENT  CDCl3
NS        2048
DS        4
SWH       24038.461 Hz
FIDRES    0.366798 Hz
AQ         1.3631988 sec
RG         144
DW         20.800 usec
DE         6.50 usec
TE         96.4 K
D1         2.00000000 sec
D11        0.03000000 sec

===== CHANNEL f1 =====
NUC1      13C
P1        10.00 usec
SI        32768
SF        100.6127583 MHz
WDW       EM
SSB       0
LB        1.00 Hz
GB         0
PC         1.40

```



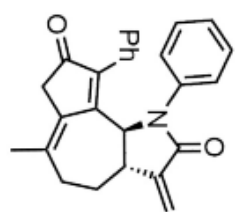

49

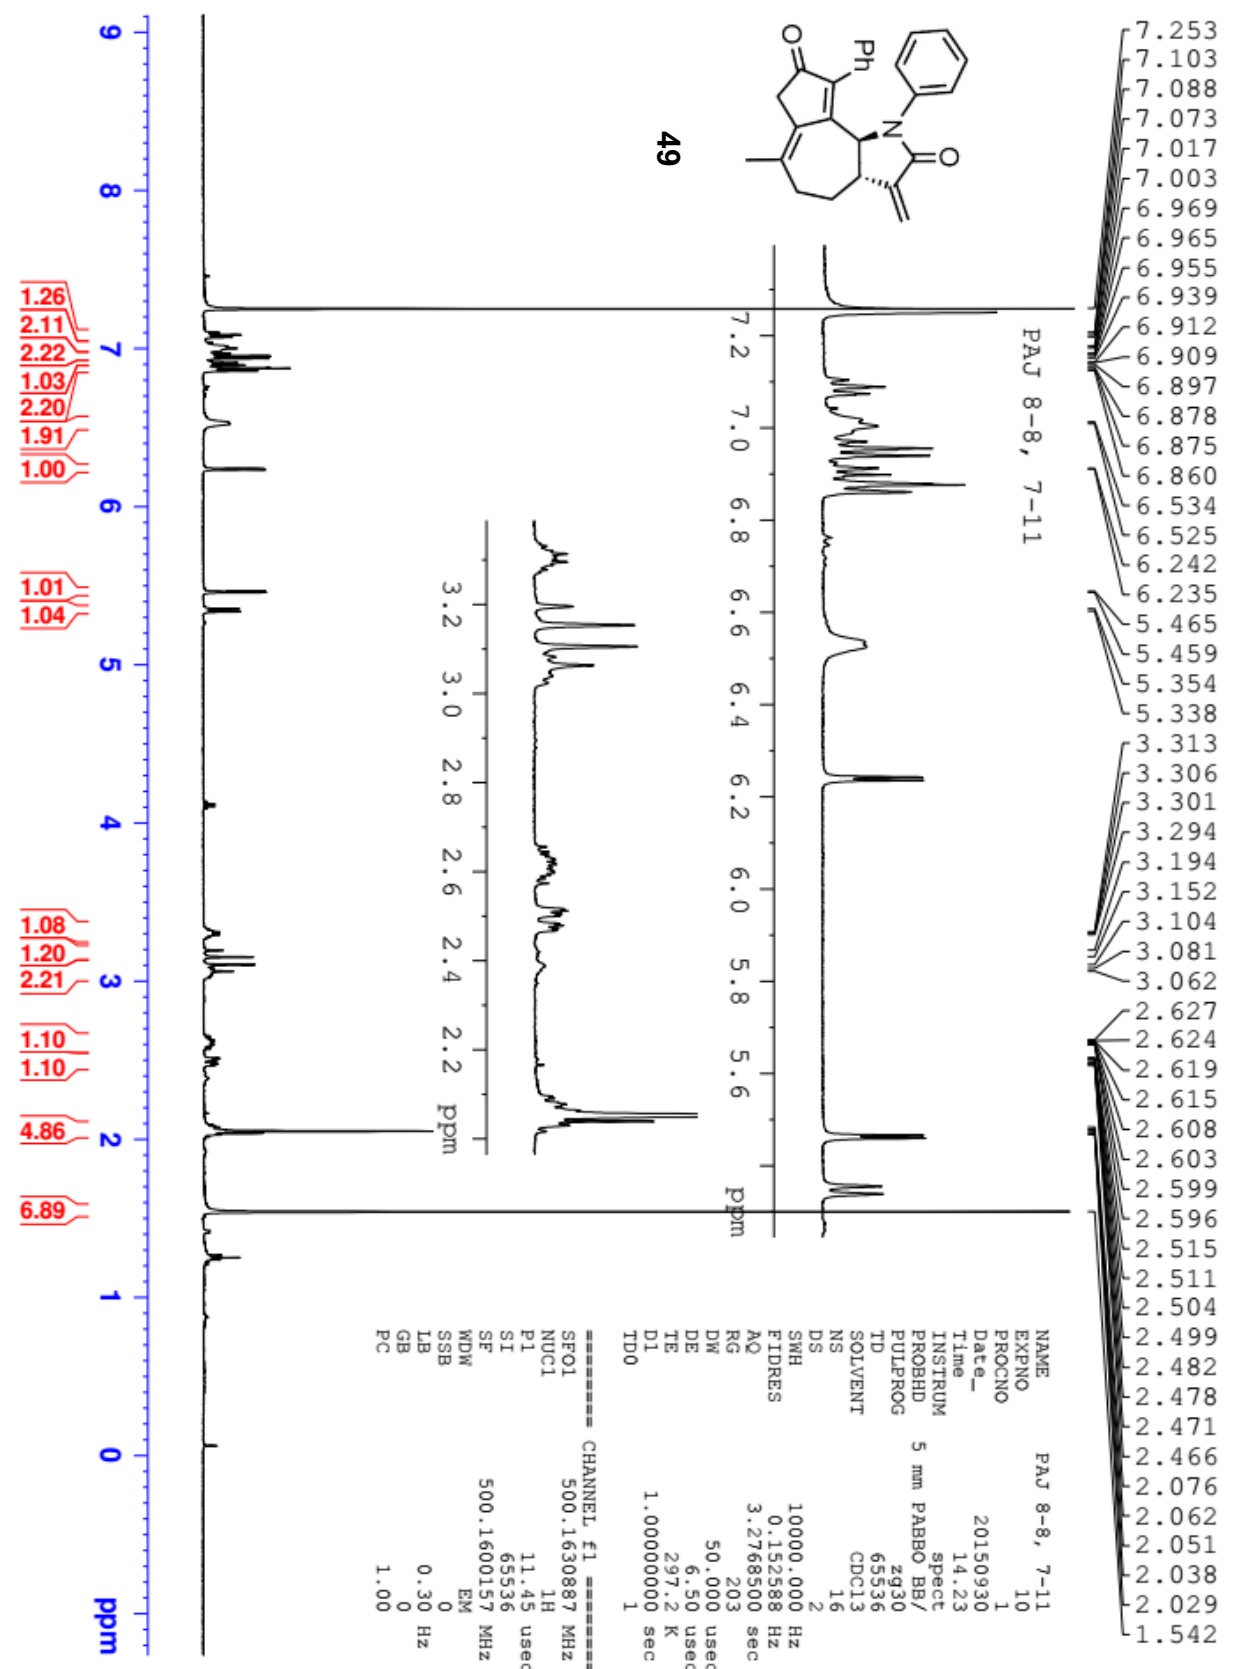

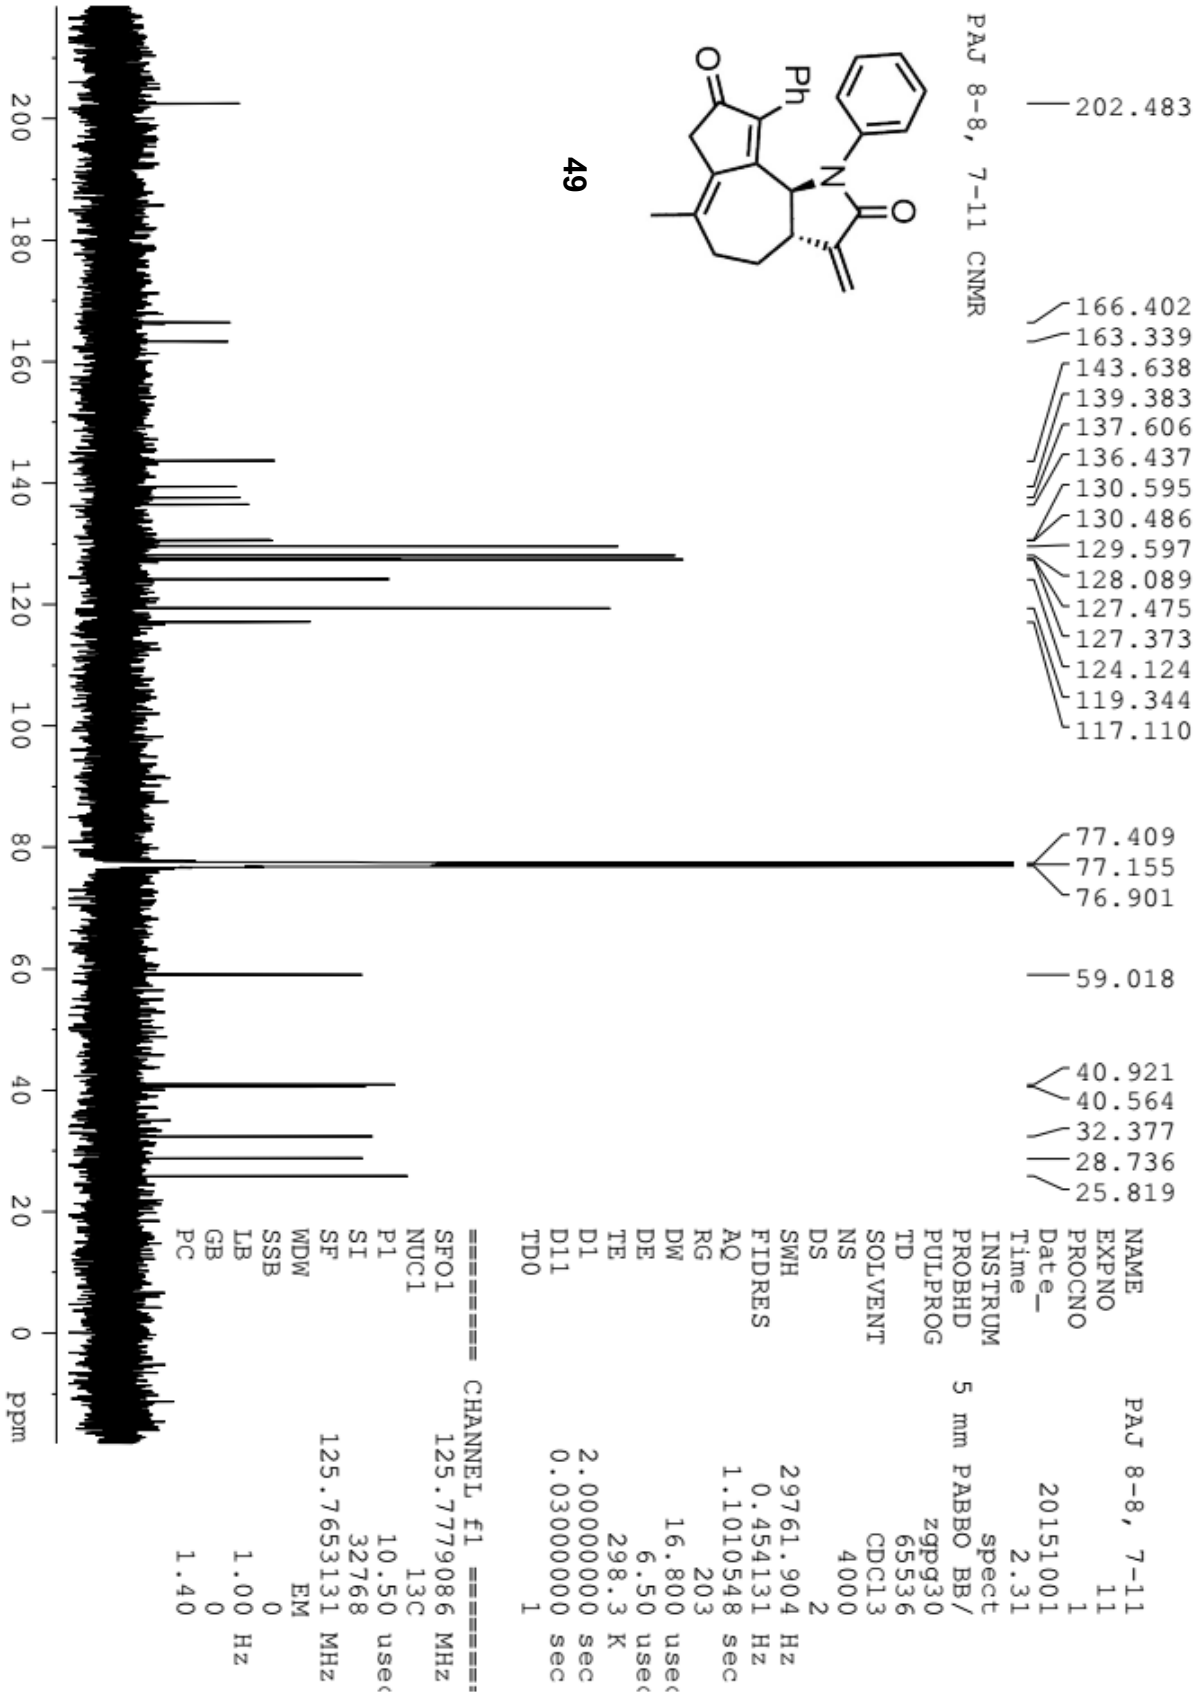

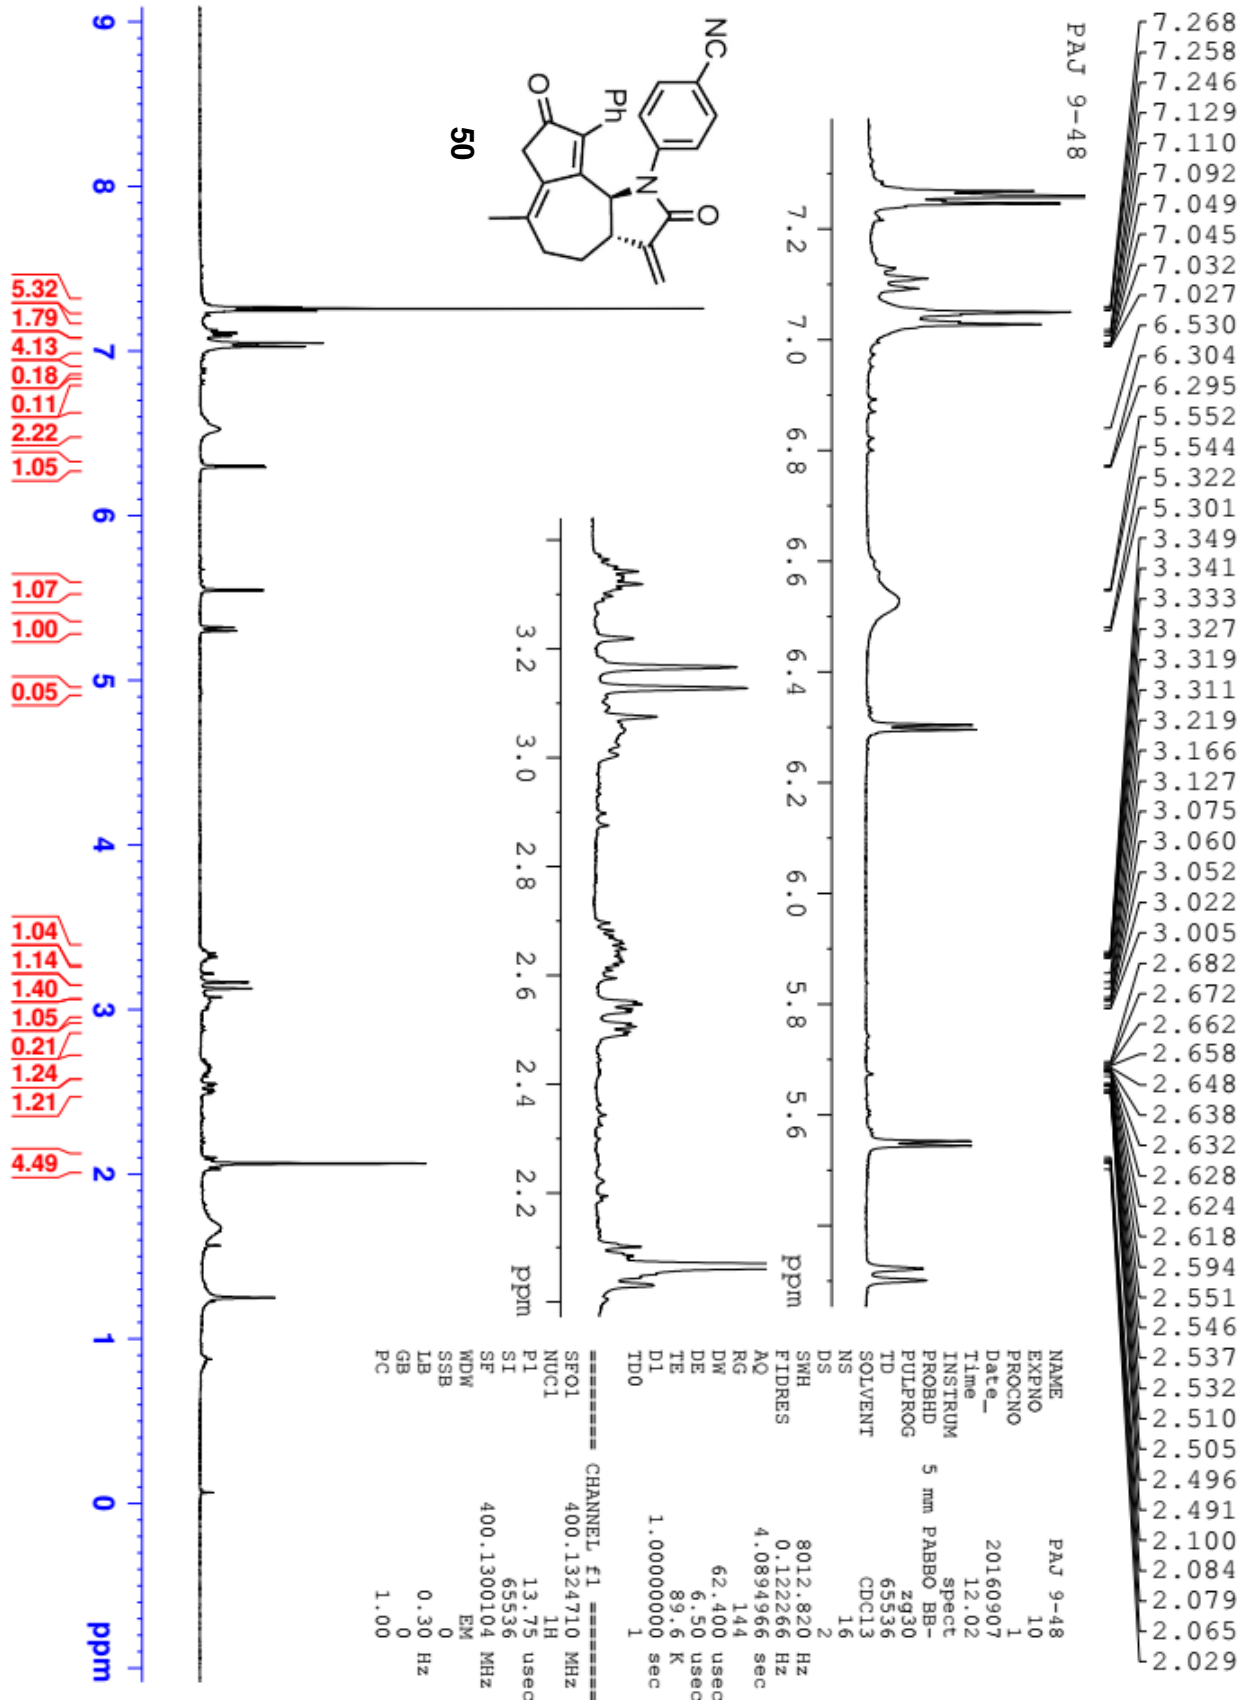

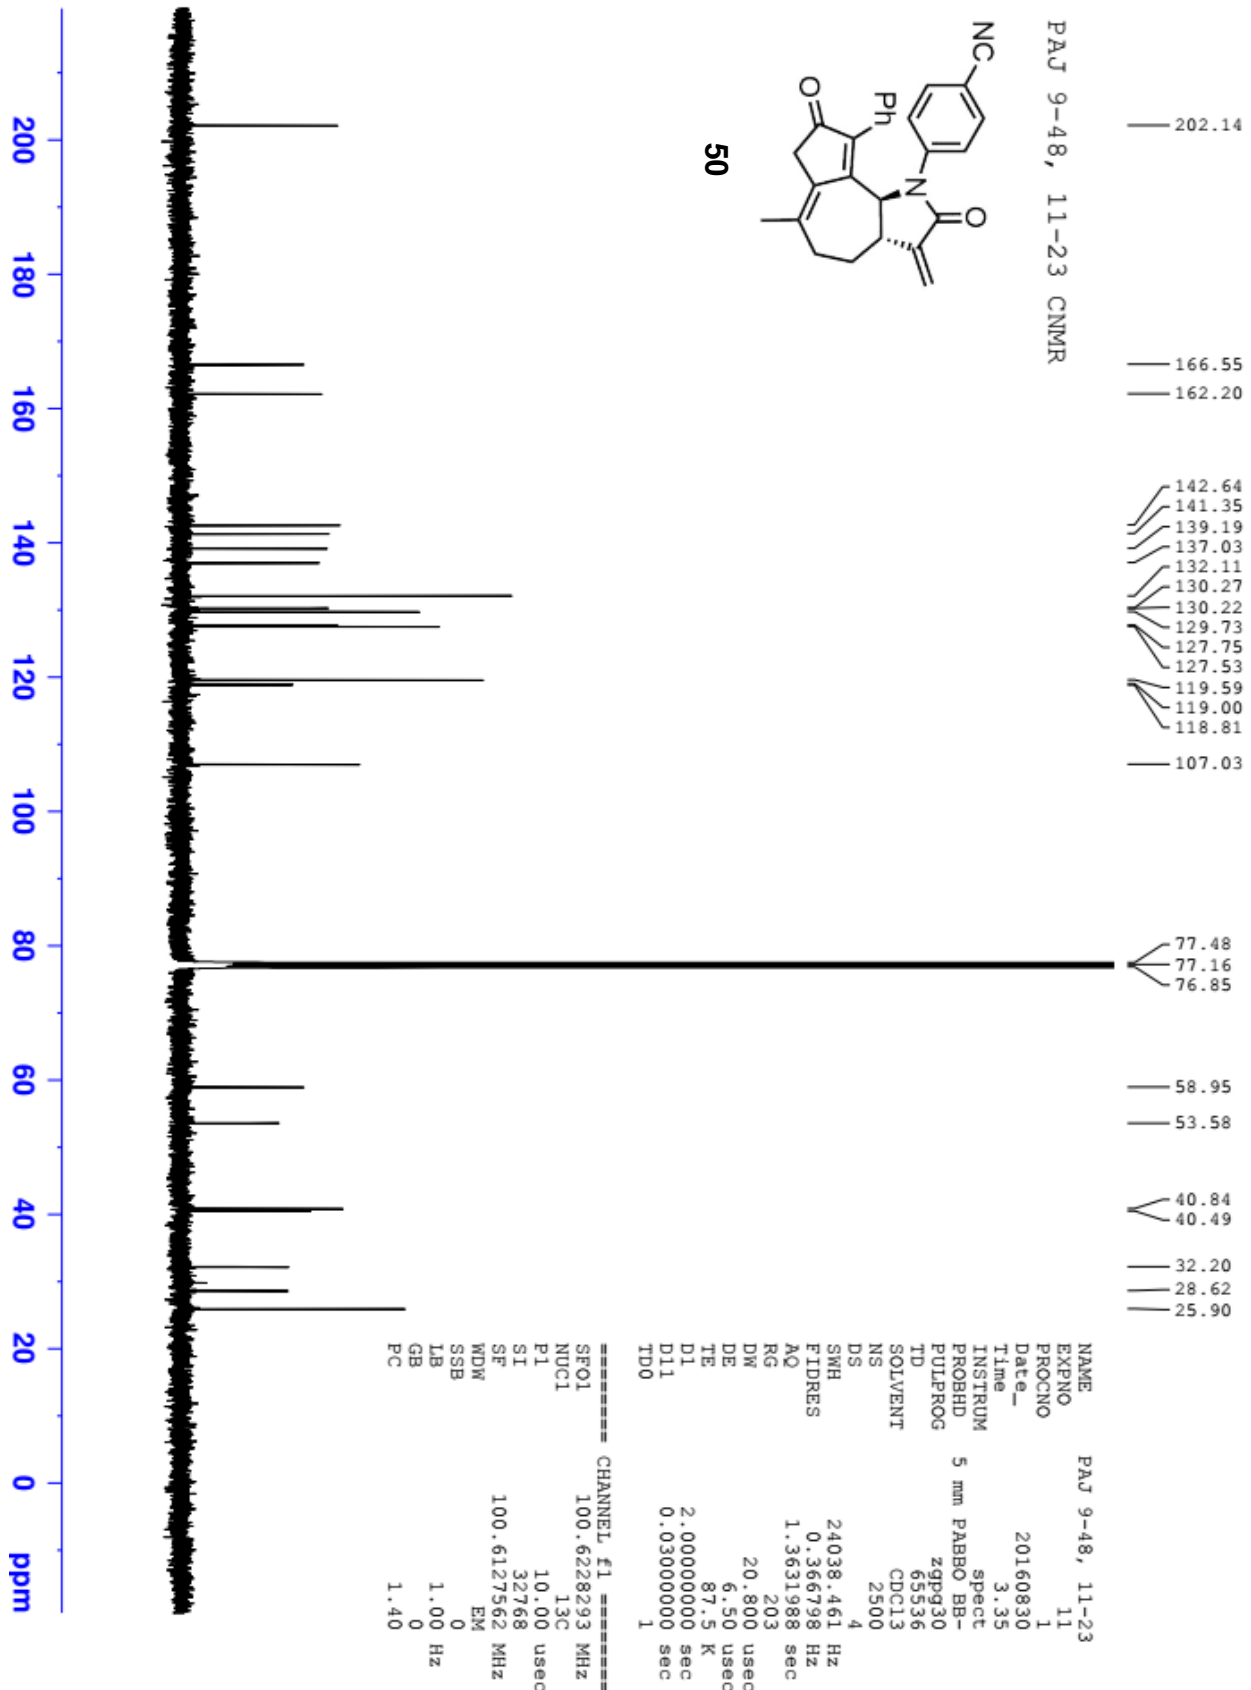

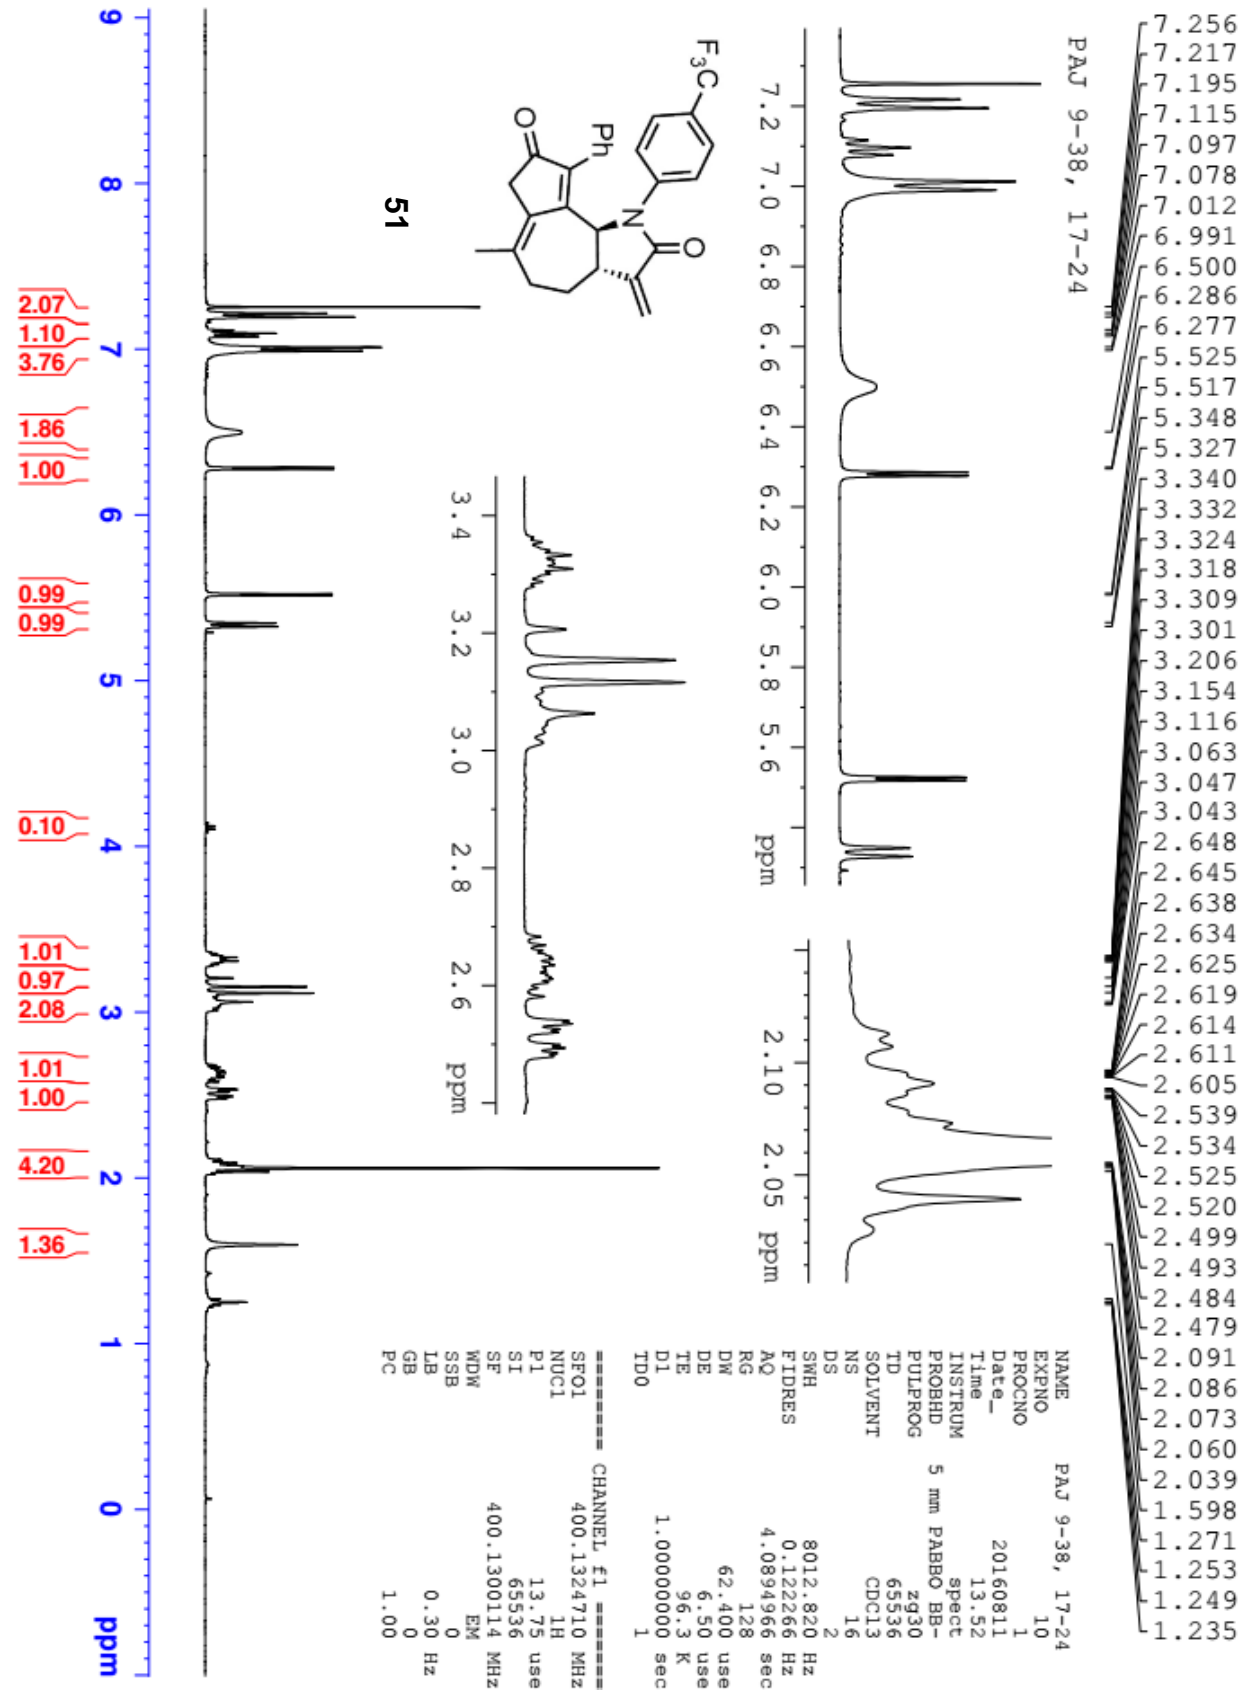

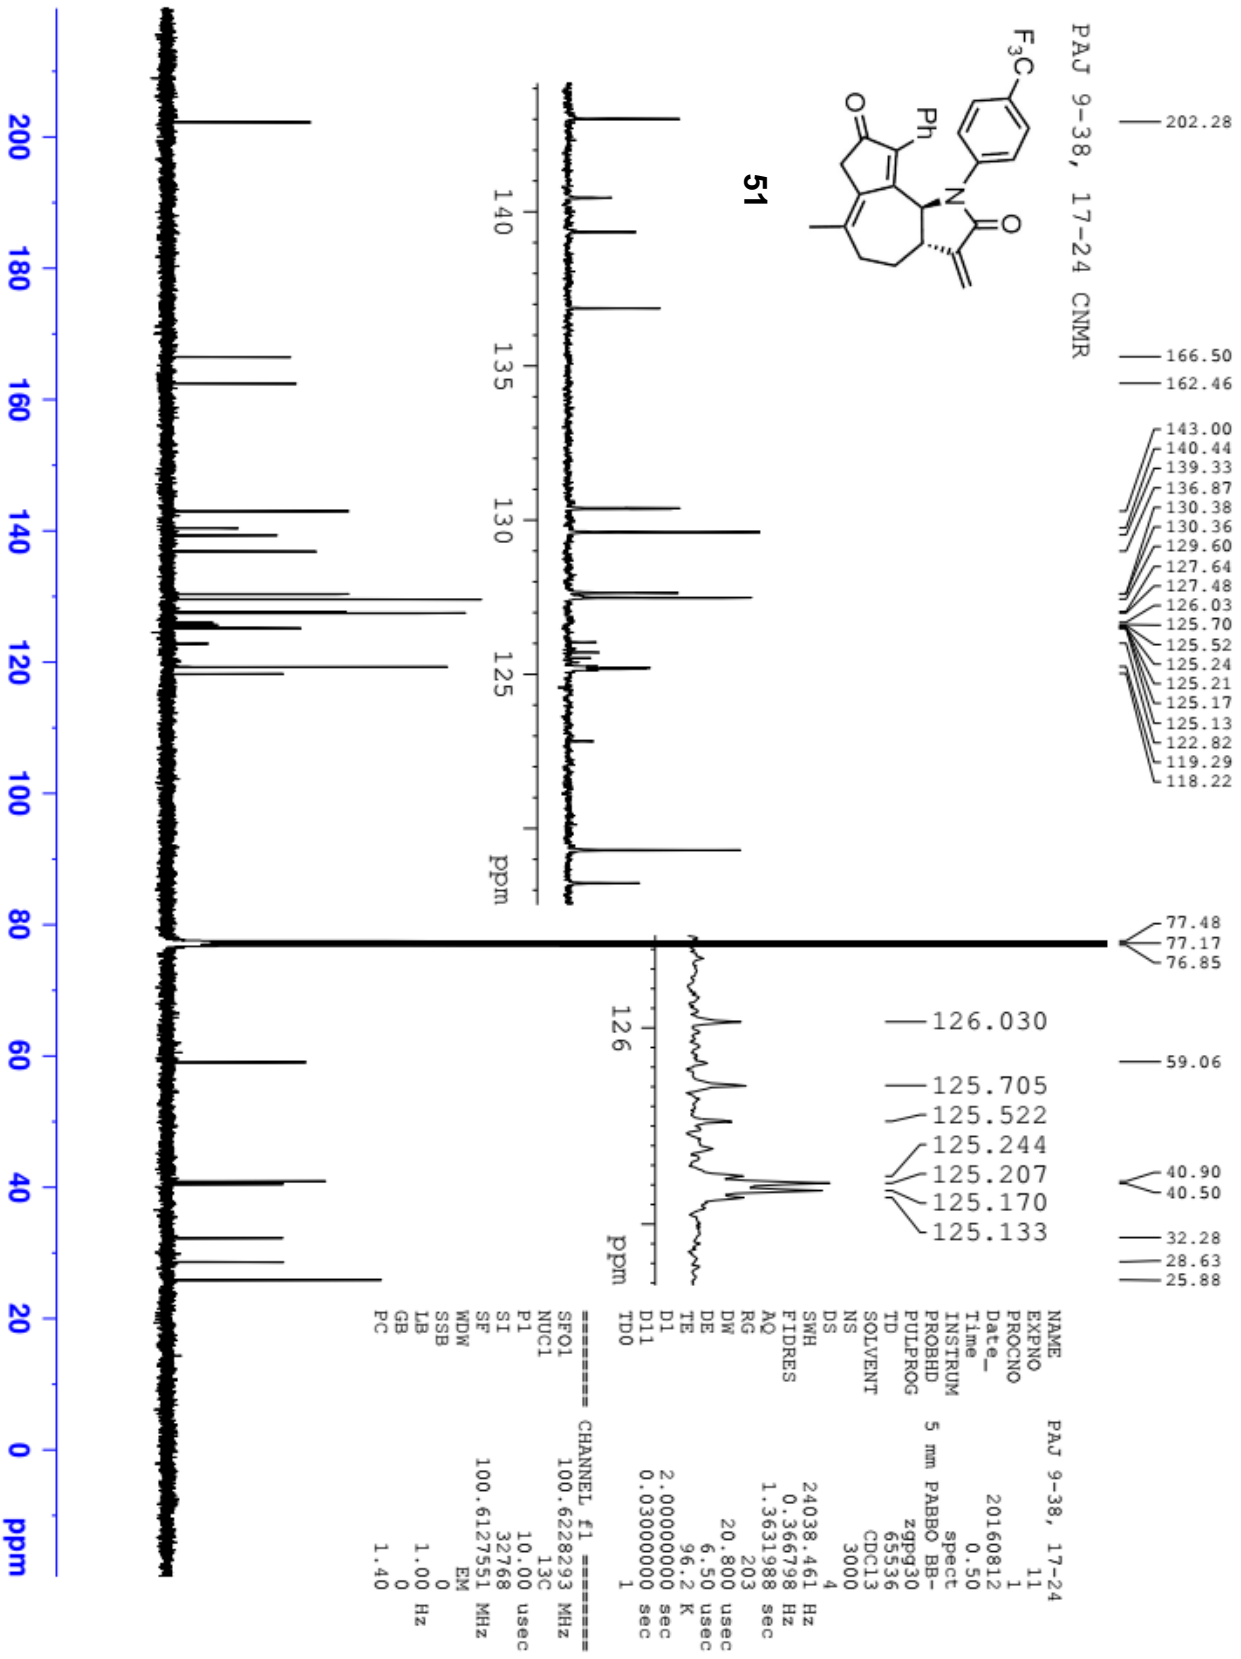

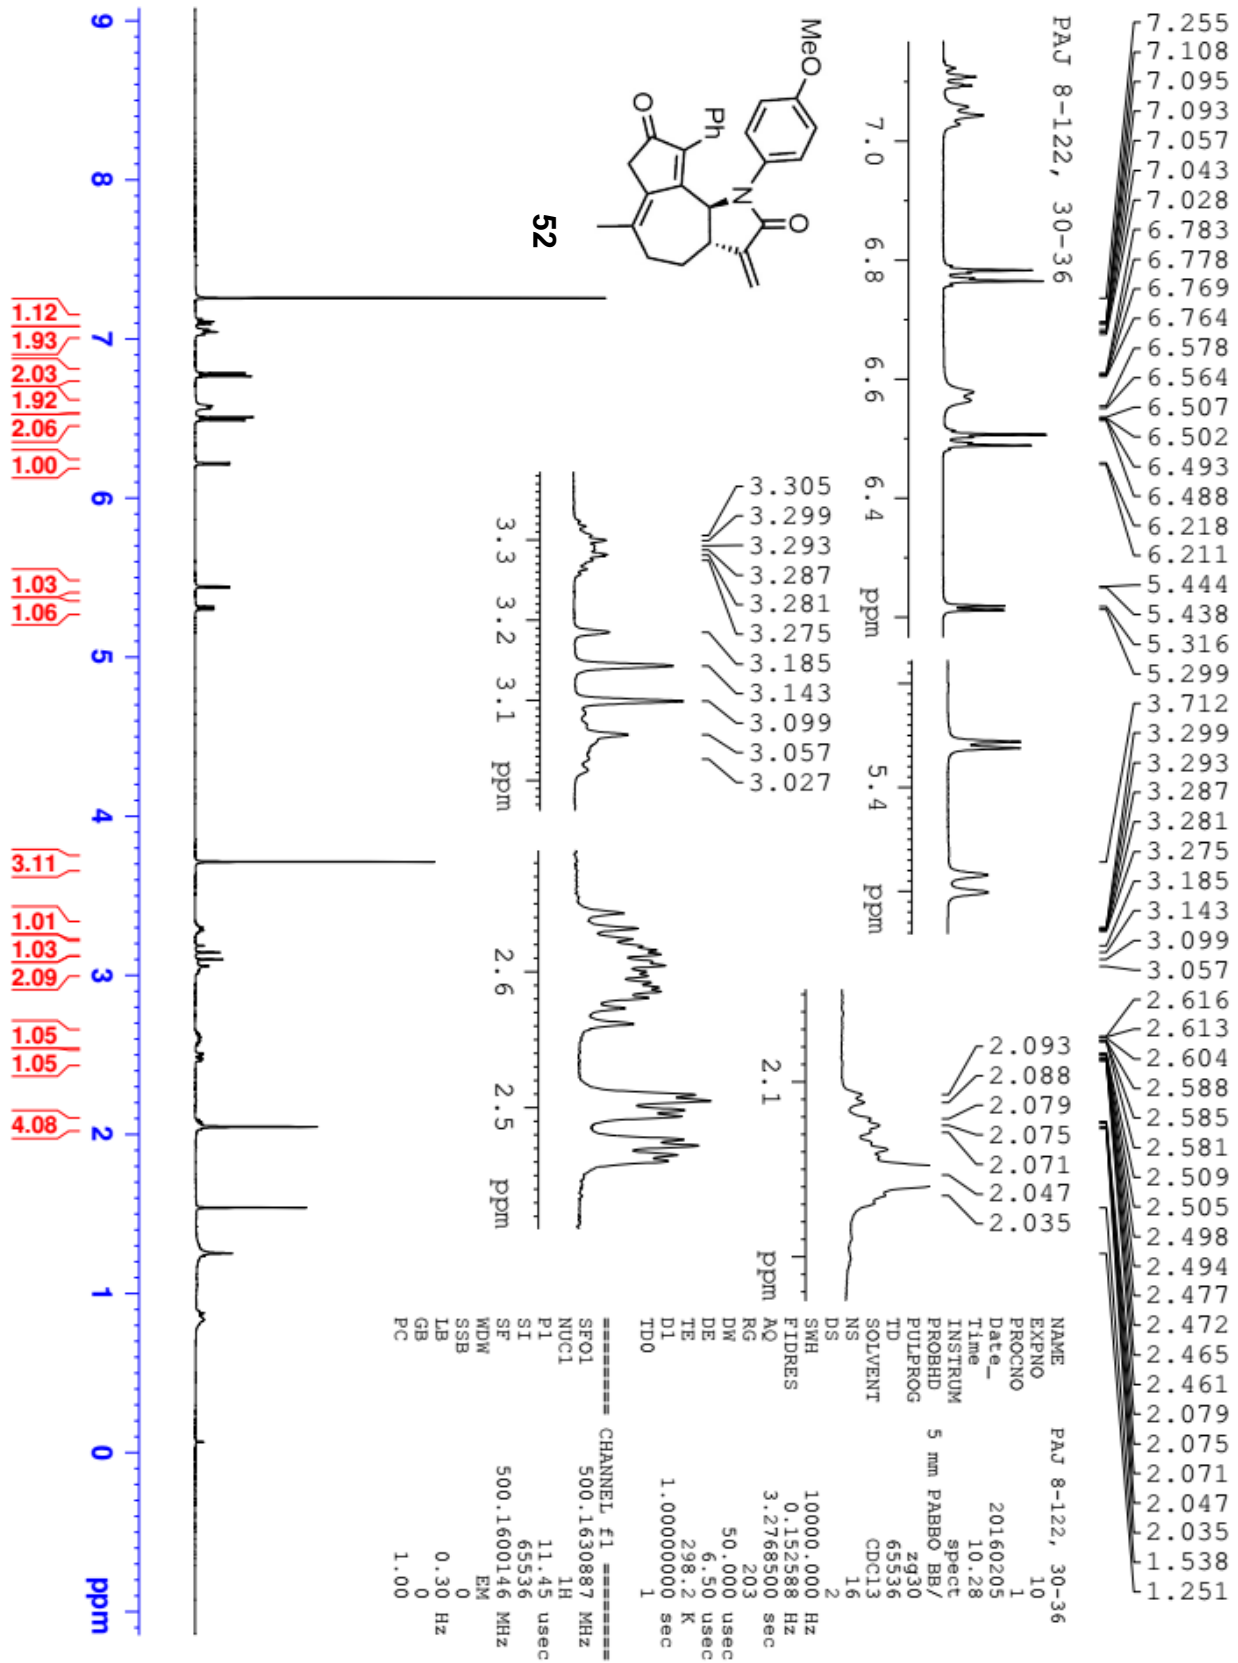

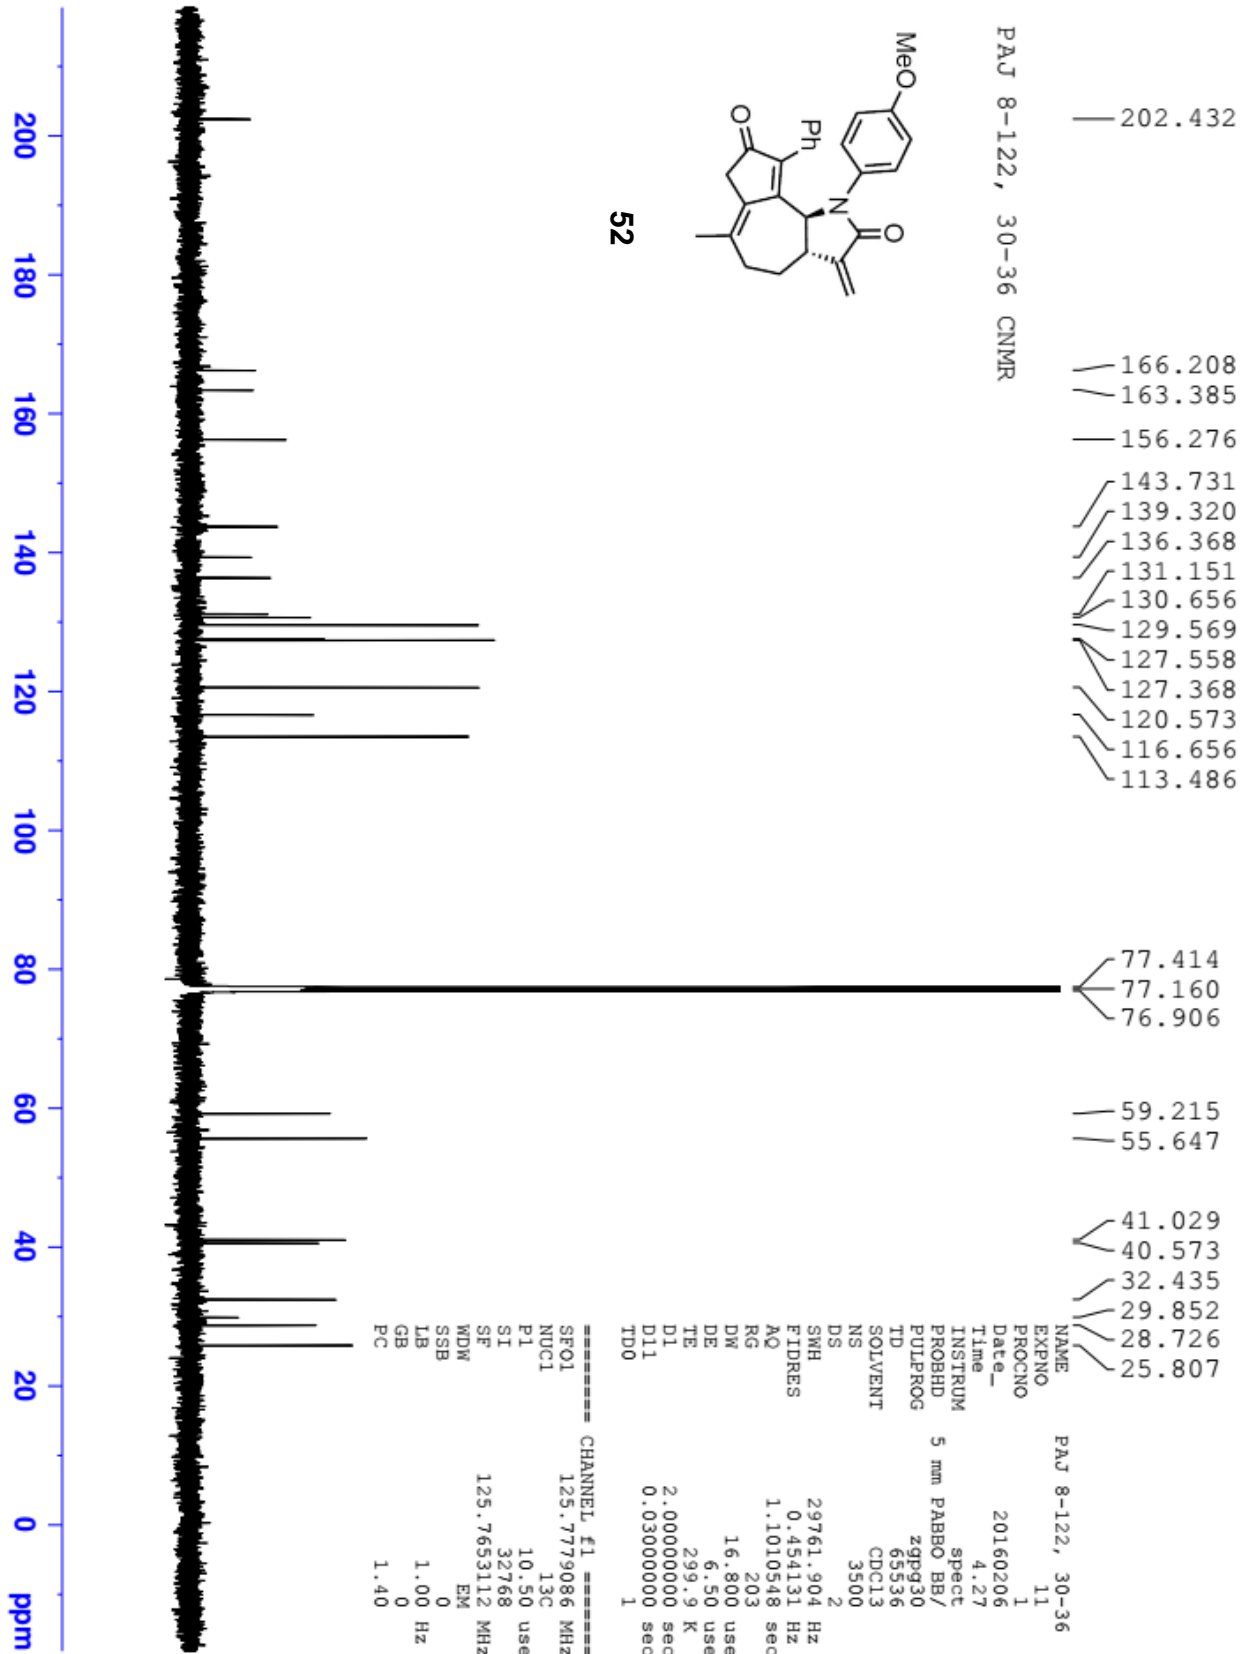



7.258  
7.100  
7.087  
7.083  
7.079  
7.072  
7.054  
7.037  
6.705  
6.701  
6.691  
6.688  
6.648  
6.645  
6.641  
6.629  
6.625  
6.608  
6.599  
6.595  
6.585  
6.257  
6.252  
6.248  
6.244  
5.495  
5.487  
5.170  
5.150  
3.381  
3.360  
3.235  
3.183  
3.145  
3.092  
2.624  
2.538  
2.534  
2.522  
2.518  
2.497  
2.493  
2.482  
2.478  
2.060  
2.034  
2.028  
2.019  
2.014  
2.009  
2.005  
2.000  
1.995  
1.990  
1.567

PAJ 9-2, 11-14

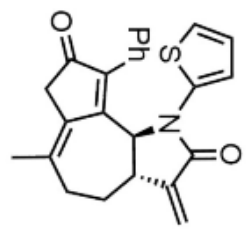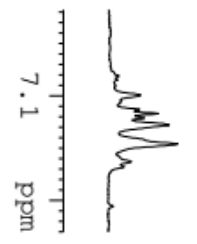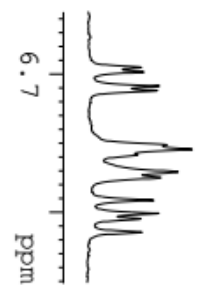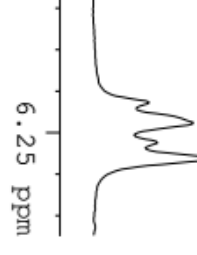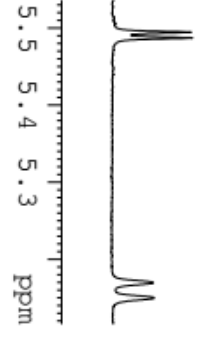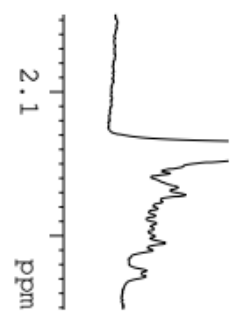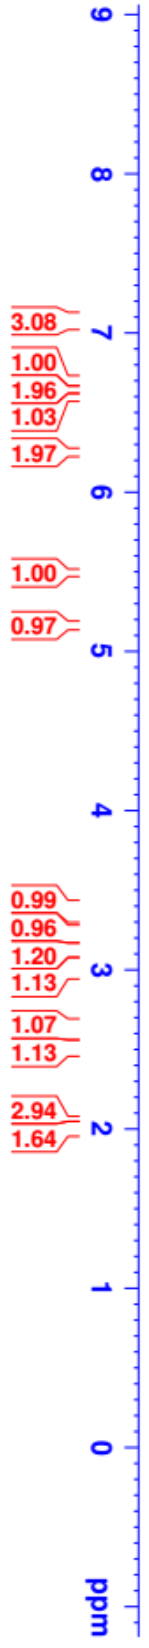

```

NAME          PAJ 9-2, 11-14
EXPNO         10
PROCNO        1
Date_         20160607
Time         17.07
INSTRUM       5 mm PABBO BB-
PROBHD        zg30
PULPROG       65536
TD            65536
SOLVENT       CDCl3
NS            16
DS            2
SWH           8012.820 Hz
FIDRES        0.122266 Hz
AQ            4.0894966 sec
RG            161
DE            62.400 usec
TE            95.8 K
D1            1.00000000 sec
TD0           1

----- CHANNEL f1 -----
SF01          400.1324710 MHz
NUC1          1H
P1            13.75 usec
SI            65536
SF            400.1300106 MHz
WDW           EM
SSB           0
LB            0.30 Hz
GB            0
PC            1.00
  
```

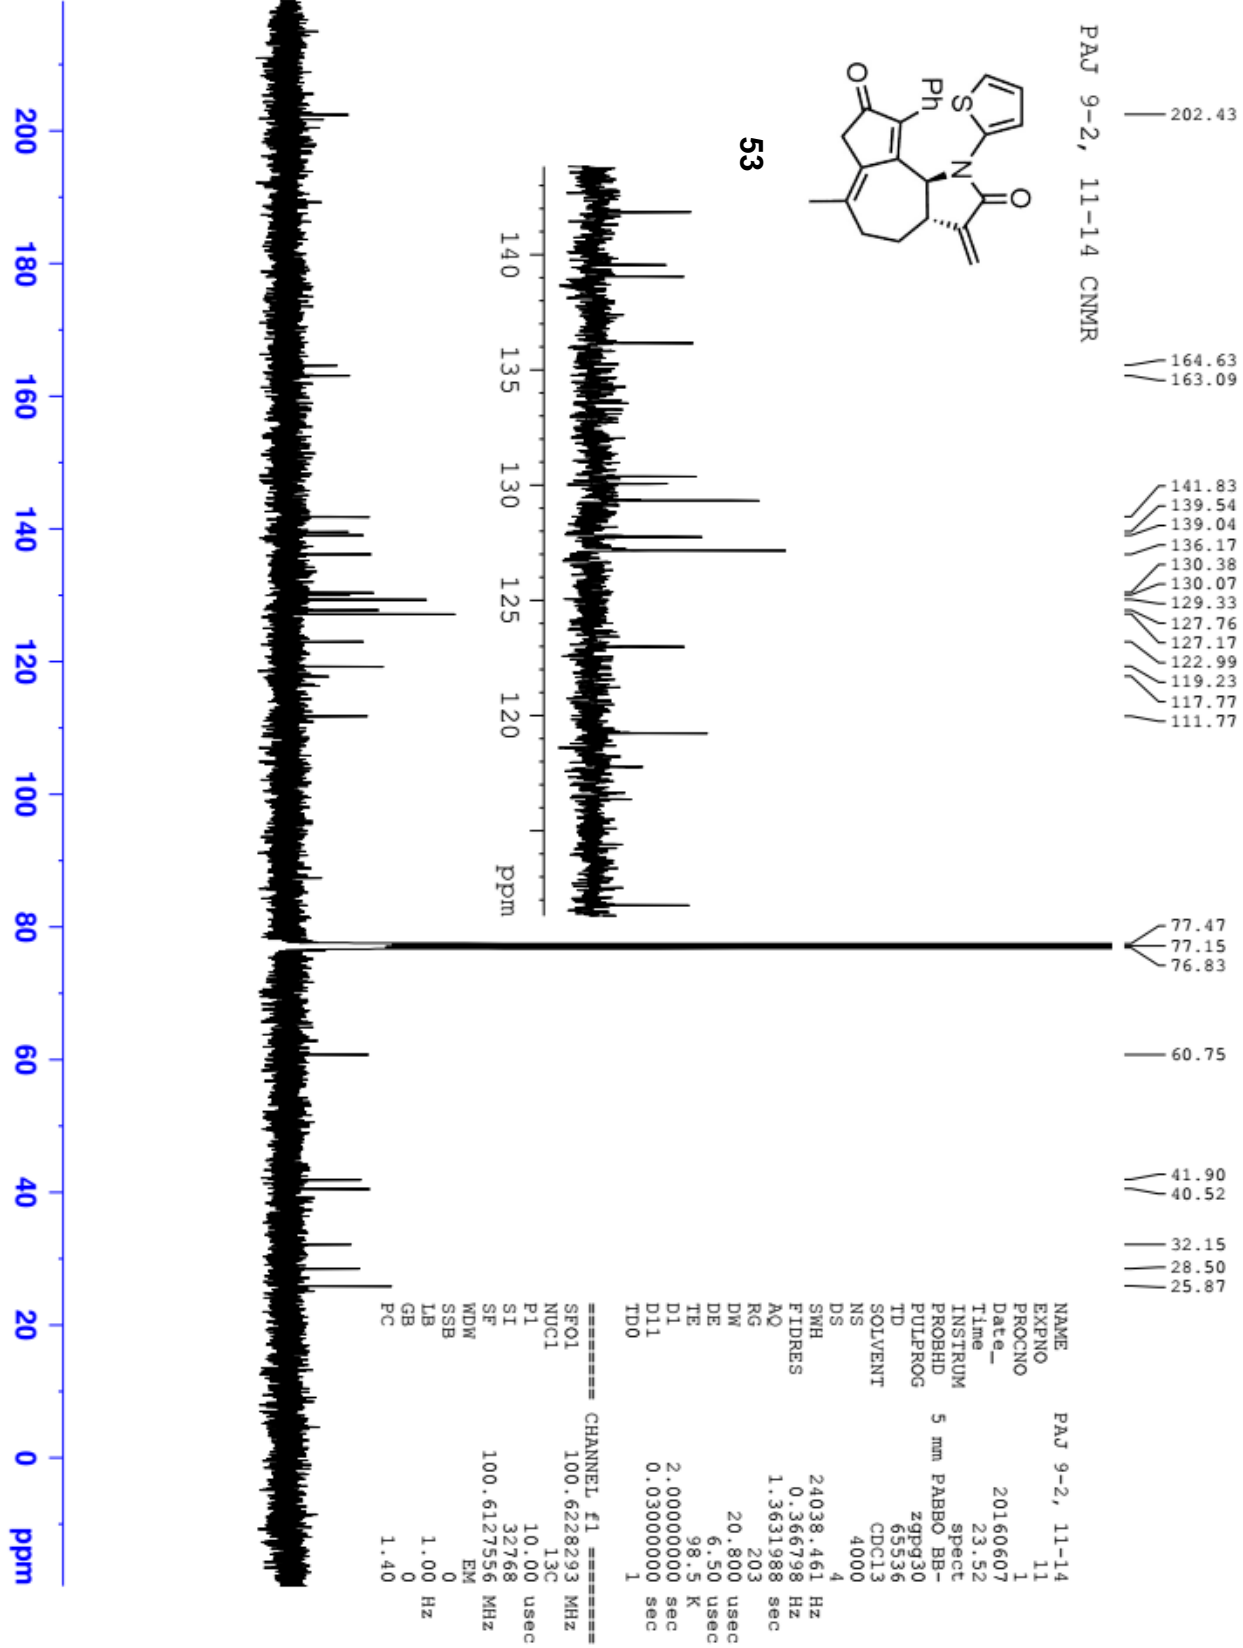

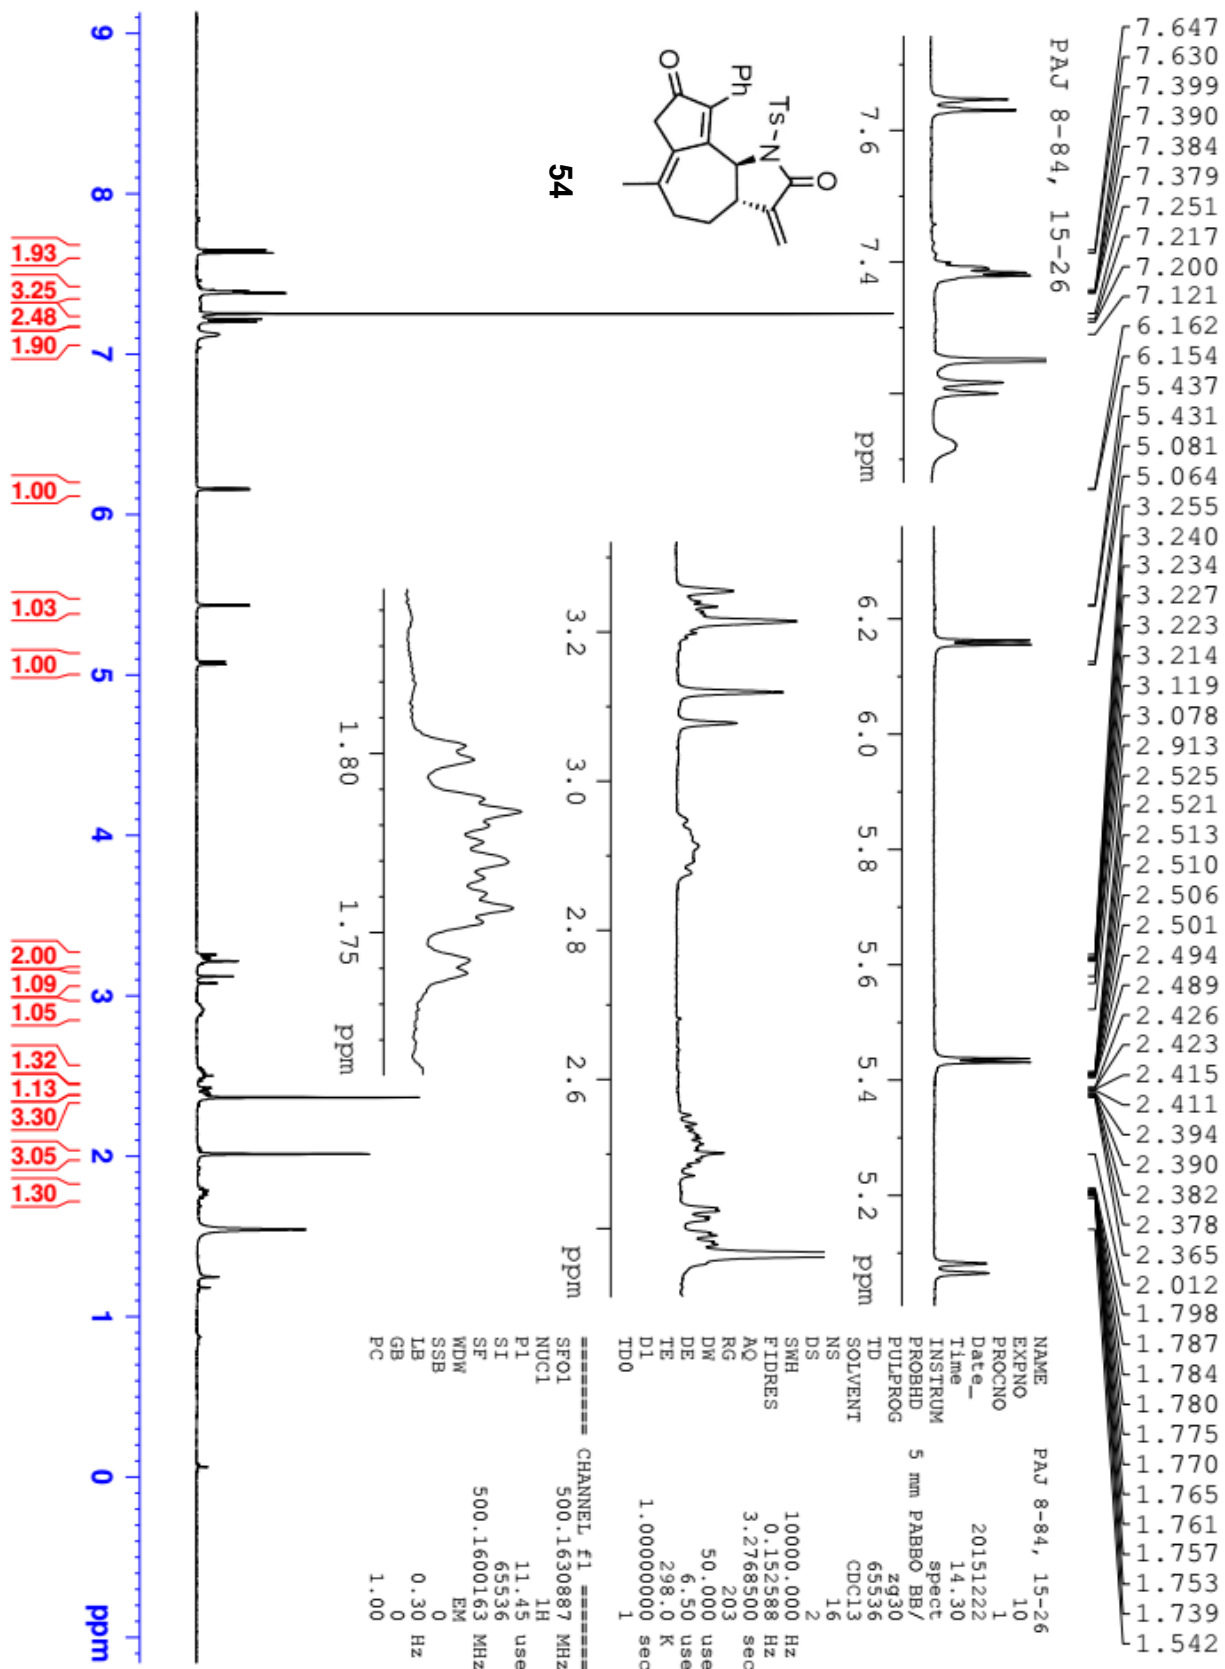

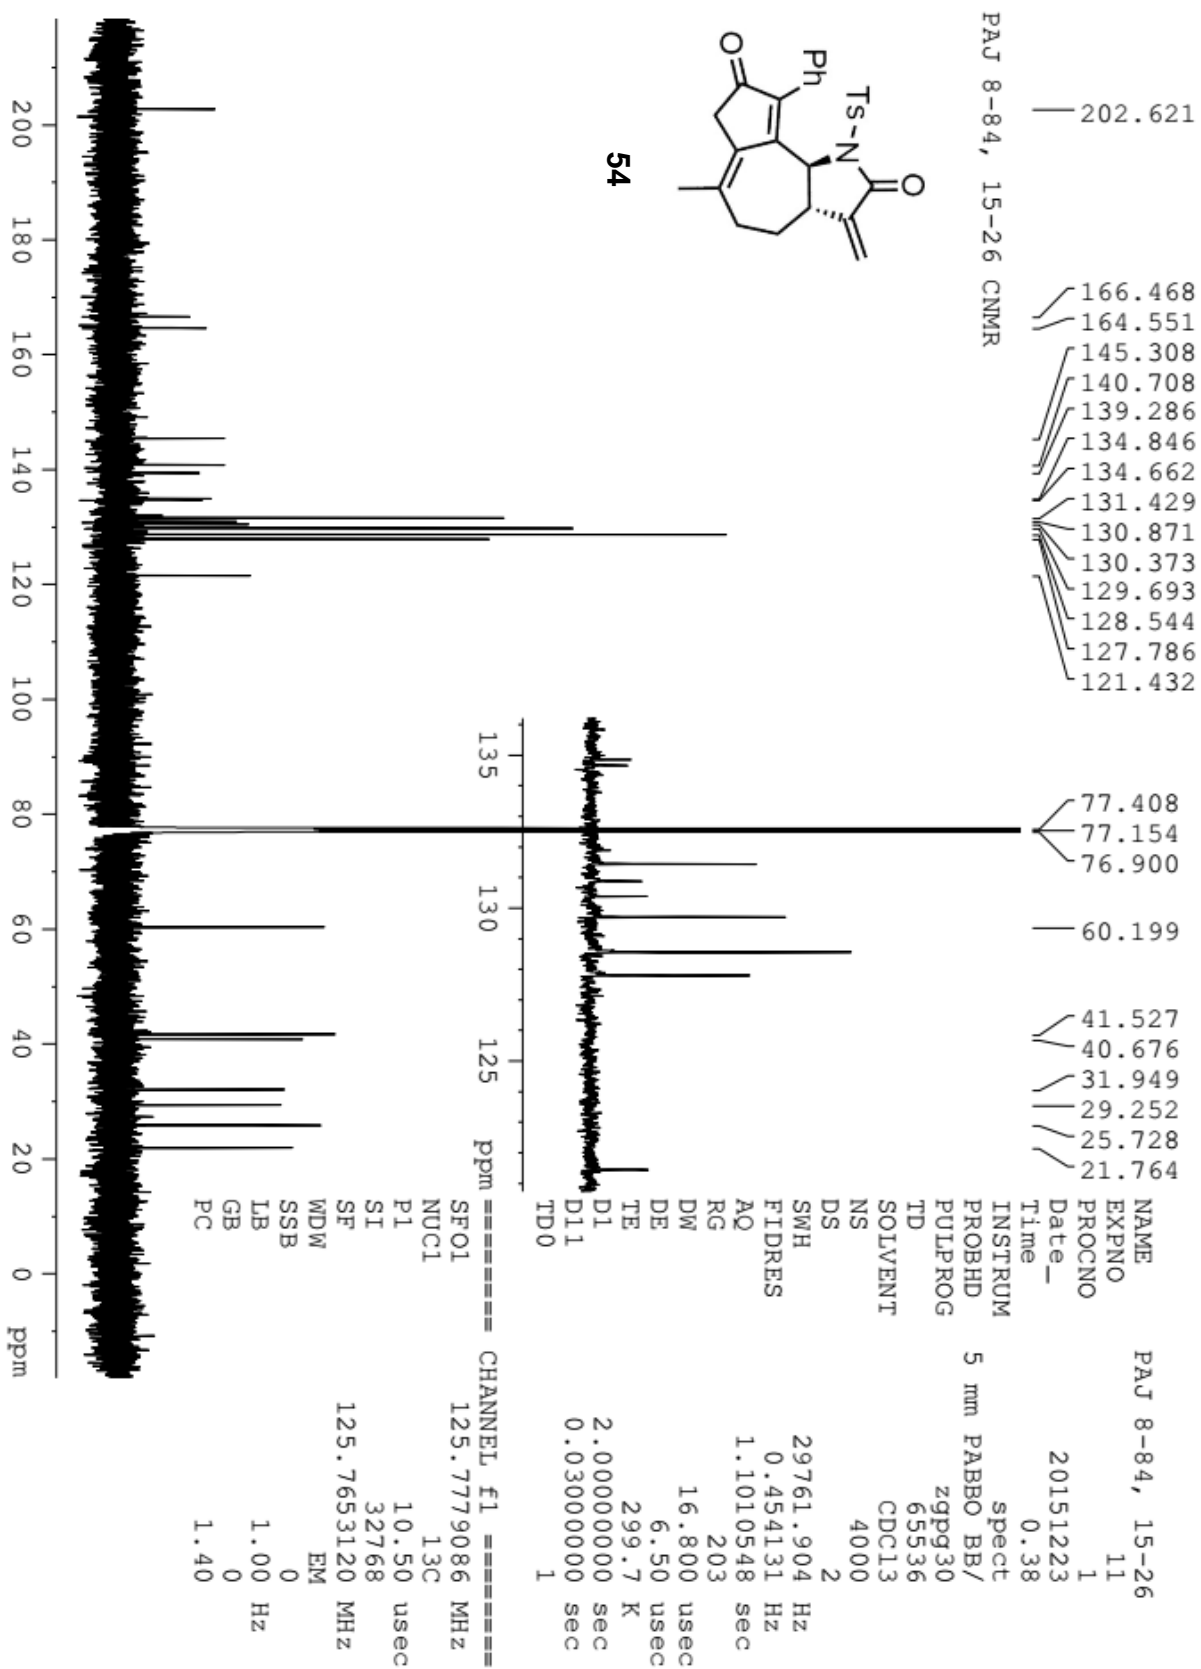

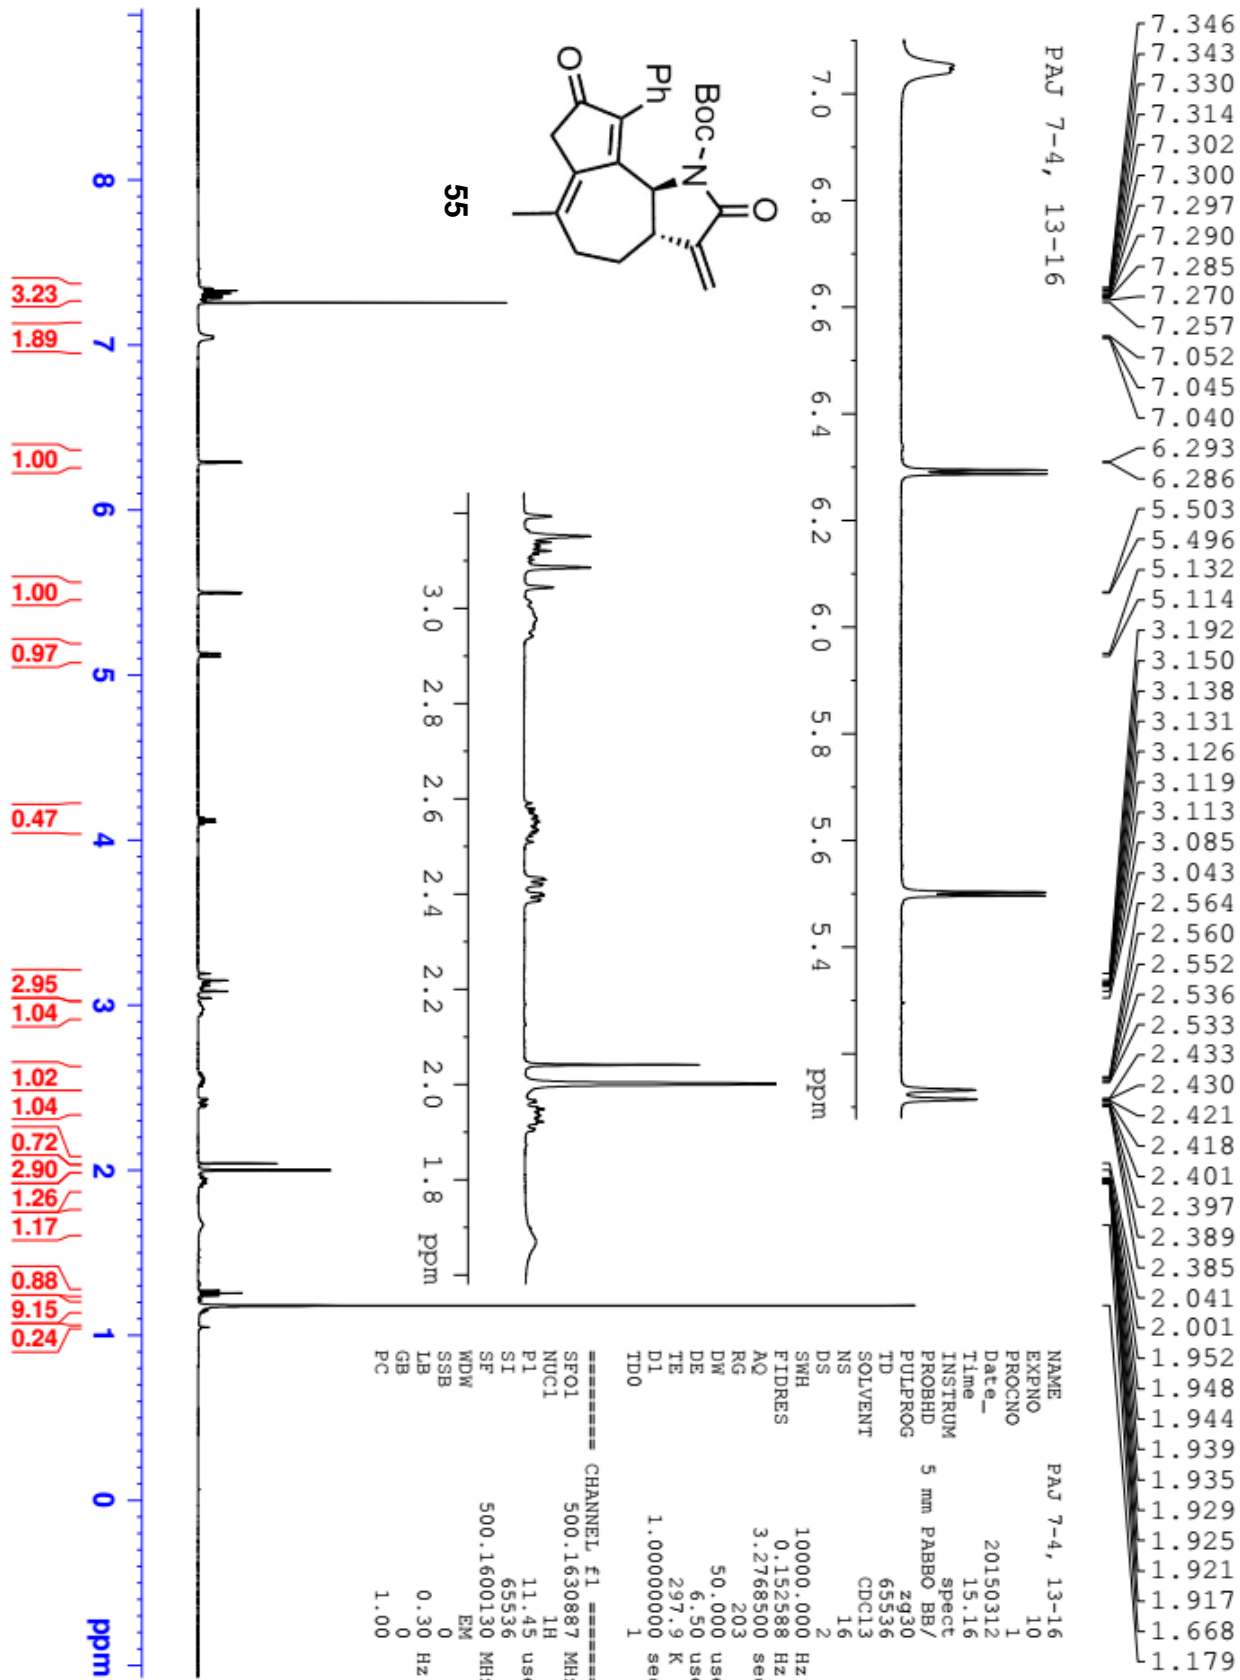

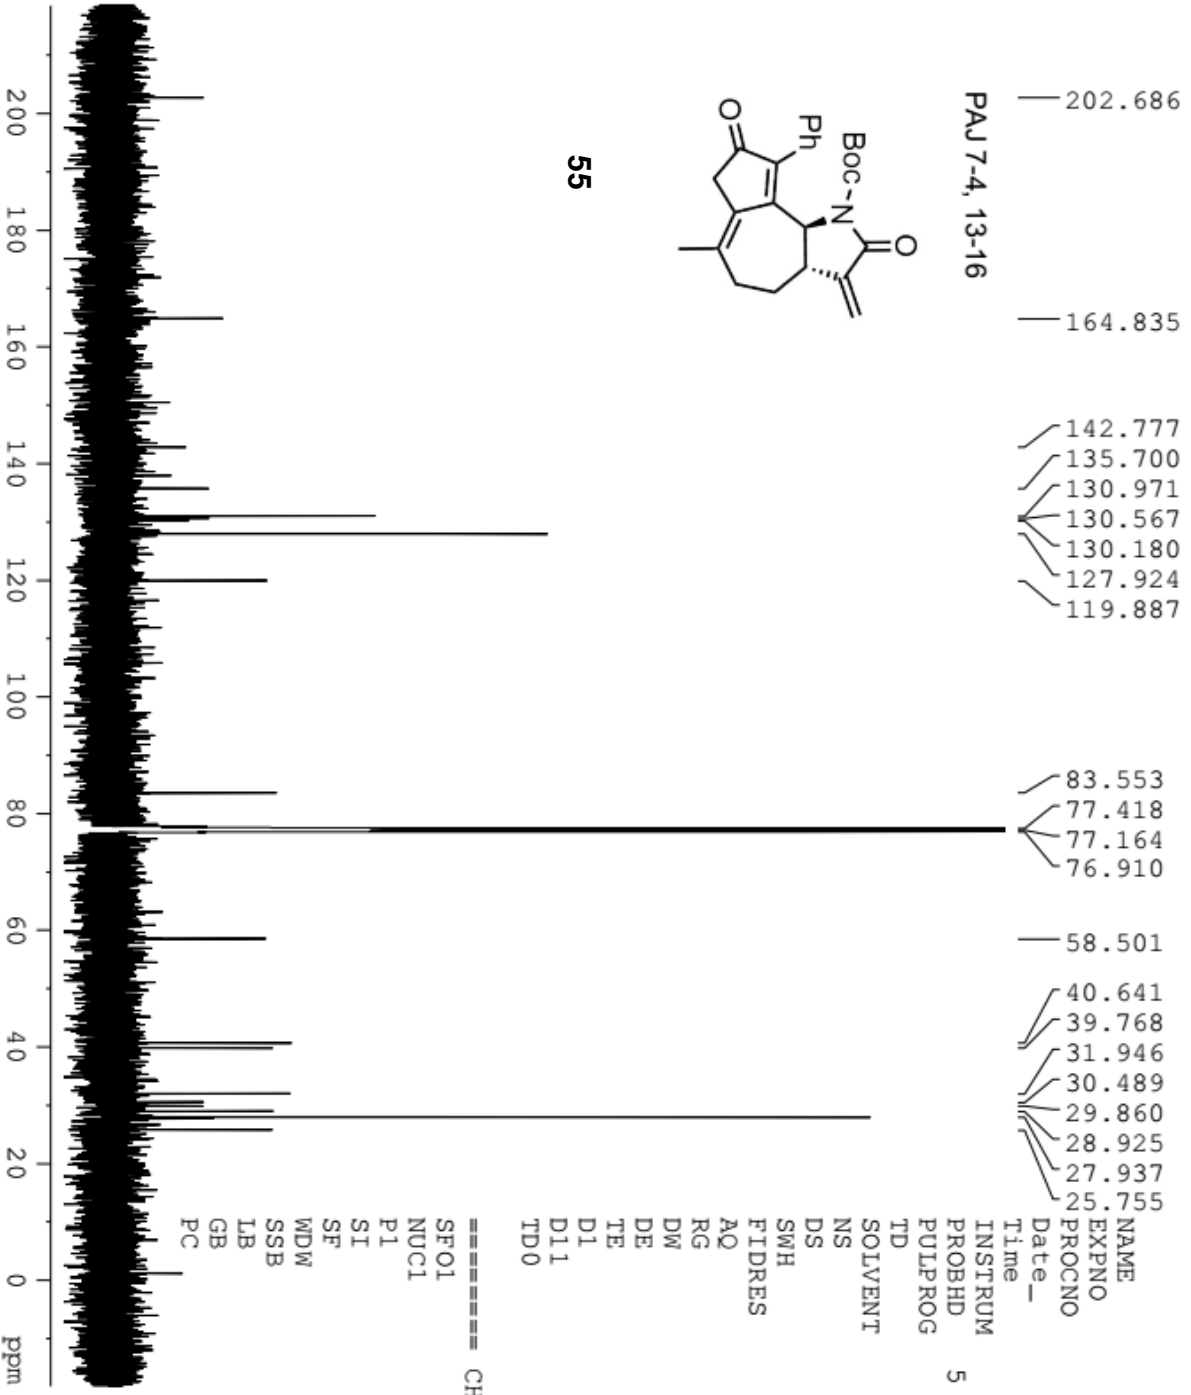

55

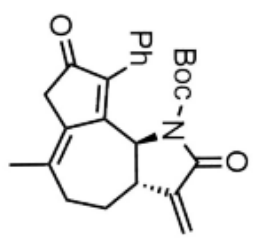

PAJ 7-4, 13-16

- 202.686
- 164.835
- 142.777
- 135.700
- 130.971
- 130.567
- 130.180
- 127.924
- 119.887

- 83.553
- 77.418
- 77.164
- 76.910

- 58.501
- 40.641
- 39.768
- 31.946
- 30.489
- 29.860
- 28.925
- 27.937
- 25.755

```

NAME                PAJ 7-4
EXPNO                11
PROCNO               1
Date_                20150522
Time_                1.38
INSTRUM              spect
PROBHD               5 mm PABBO BB/
PULPROG              zgpg30
TD                   65536
SOLVENT              CDCl3
NS                   3000
DS                   2
SWH                  29761.904 Hz
FIDRES               0.454131 Hz
AQ                   1.1010548 sec
RG                   203
DW                   16.800 use
DE                   6.50 use
TE                   298.7 K
D1                   2.00000000 sec
D11                  0.03000000 sec
TD0                  1

===== CHANNEL f1 =====
SF01                 125.7779086 MHz
NUC1                 13C
P1                   10.50 use
SI                   32768
SF                   125.7653120 MHz
WDW                  EM
SSB                  0
LB                   1.00 Hz
GB                   0
PC                   1.40
  
```

7.257  
6.037  
4.651  
4.645  
4.638  
4.632  
4.625  
3.932  
3.929  
3.917  
3.914  
2.390  
2.386  
2.362  
2.358  
2.168  
2.152  
2.149  
2.137  
2.134  
2.122  
2.107  
2.100  
2.093  
2.088  
2.080  
2.074  
2.069  
2.062  
2.056  
2.050  
2.038  
2.032  
2.026  
2.019  
2.005  
1.787  
1.771  
1.759  
1.753  
1.747  
1.741  
1.728  
1.707  
1.700  
1.694  
1.687  
1.672  
1.669  
1.622  
1.607  
1.591  
1.250  
1.236  
1.101  
1.086

PAJ 8-74, 4-8

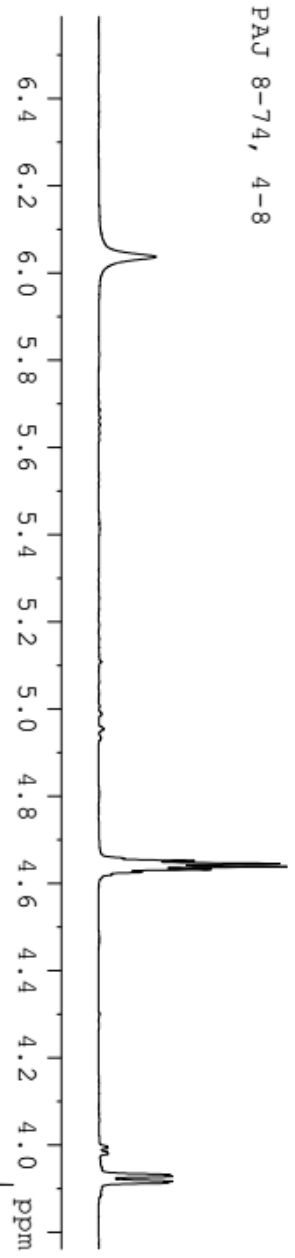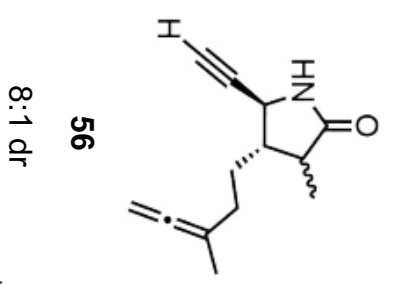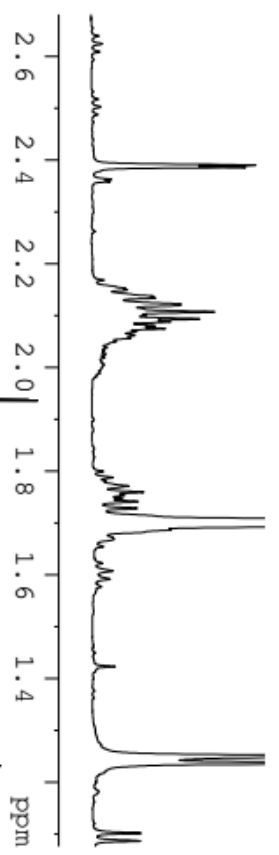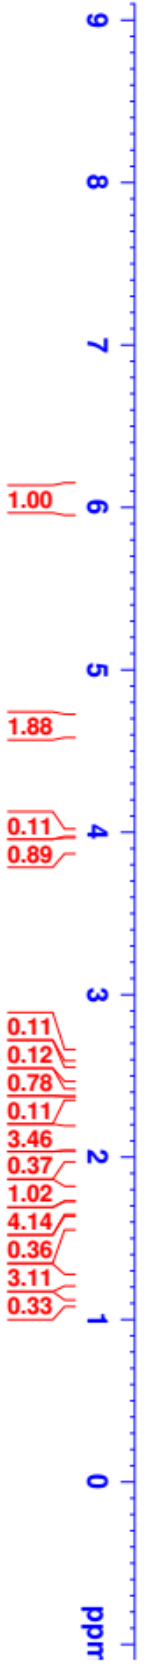

1.00  
1.88  
0.11  
0.89  
0.11  
0.12  
0.78  
0.11  
3.46  
0.37  
1.02  
4.14  
0.36  
3.11  
0.33

```

NAME          PAJ 8-74, 4-8
EXPNO         10
PROCNO        1
Date_         20151215
Time          10.54
INSTRUM       spect
PROBHD        5 mm PABBO BB/
PULPROG       zg30
TD            65536
SOLVENT       CDCl3
NS            16
DS            2
SWH           10000.000 Hz
FIDRES        0.152588 Hz
AQ            3.2768500 sec
RG            80.6
DE            50.000 usec
TE            298.1 K
D1            1.00000000 sec
TD0           1

===== CHANNEL f1 =====
SFO1          500.1630887 MHz
NUC1          1H
P1            11.45 usec
SI            65536
SF            500.1600128 MHz
WDW           EM
SSB           0
LB            0.30 Hz
GB            0
PC            1.00
  
```

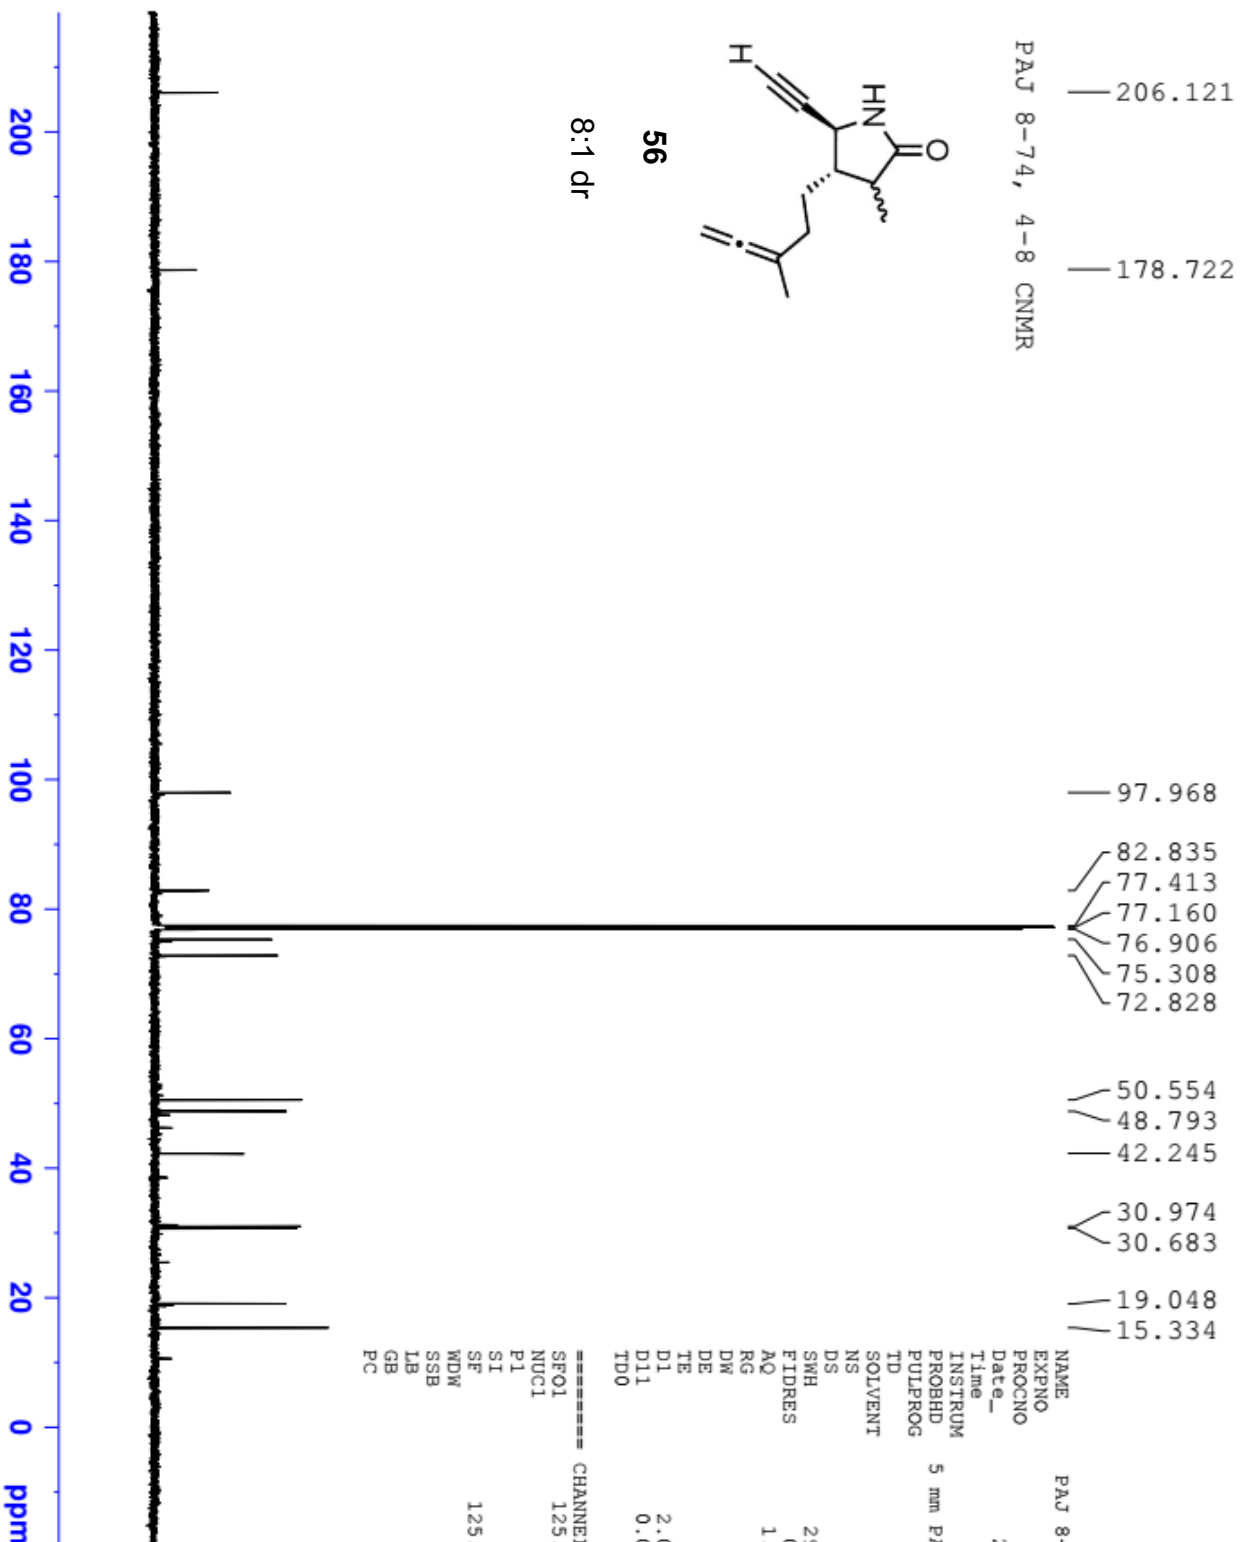



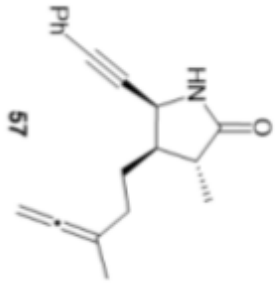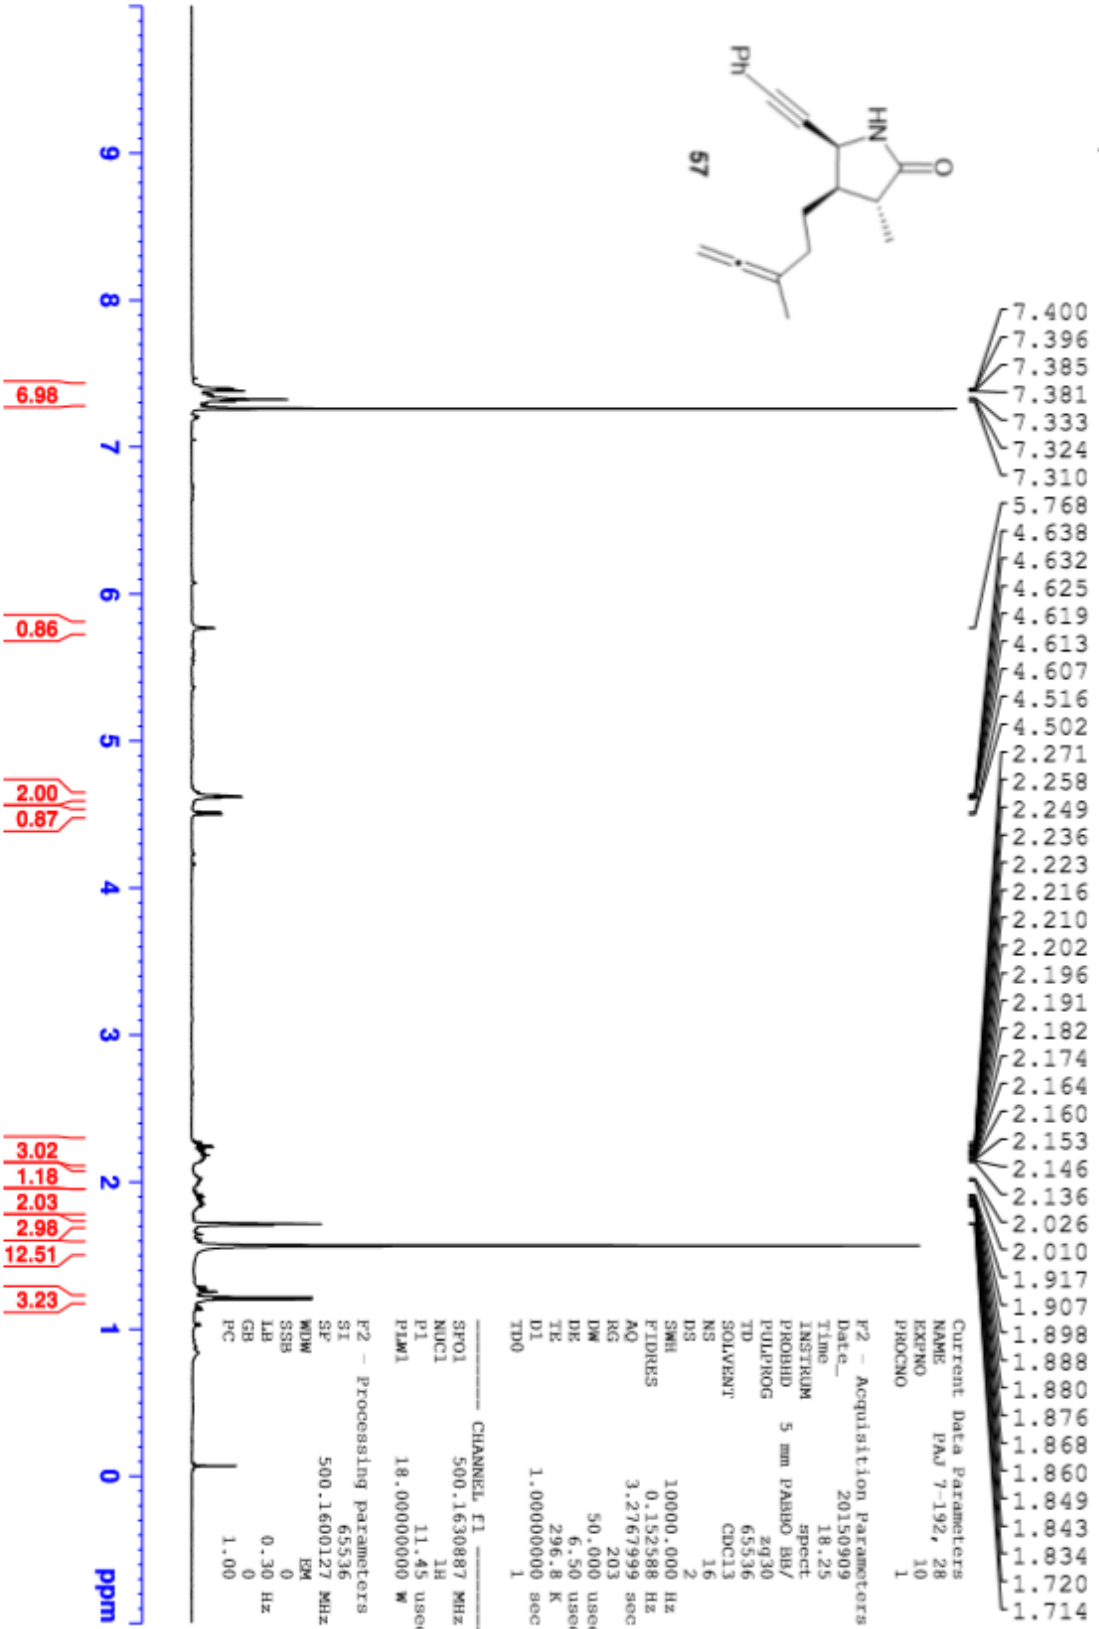

PAJ 7-192, 28 CNMR

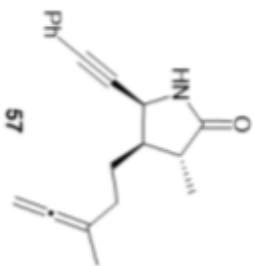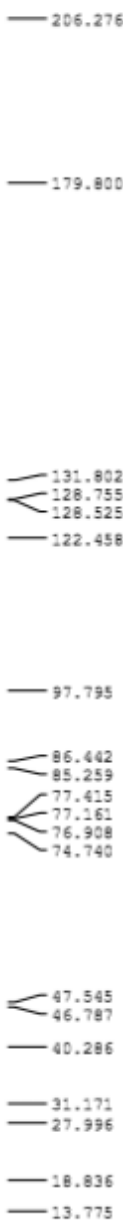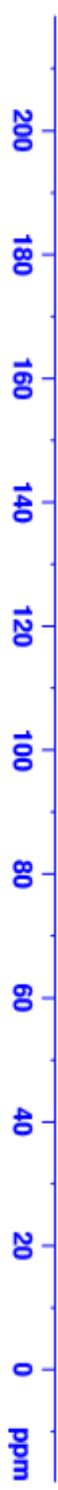

Current Data Parameters  
 NAME PAJ 7-192, 28  
 EXPNO 11  
 PROCNO 1

F2 - Acquisition Parameters  
 Date\_ 20150910  
 Time 5.52

PROBHD 5 mm PABBO BB/  
 PULPROG zgpg30  
 TD 65536  
 SOLVENT CDCl3  
 NS 4500  
 DS 2  
 SWH 29761.904 Hz  
 FIDRES 0.454131 Hz  
 AQ 1.1010048 sec  
 RG 203  
 DW 16.800 usec  
 DE 6.50 usec  
 TE 297.8 K  
 D1 2.00000000 sec  
 D11 0.03000000 sec  
 TD0 1

CHANNEL F1  
 SFO1 125.7779086 MHz  
 NUCL 13C  
 P1 10.50 usec  
 PLM1 110.00000000 W

CHANNEL F2  
 SFO2 500.1520006 MHz  
 NUCL 1H  
 CPDPRG2 waltz16  
 PCPD2 80.00 usec  
 PLM2 18.00000000 W  
 PLM12 0.36873001 W  
 PLM13 0.23598000 W

F2 - Processing parameters  
 SI 32768  
 SF 125.7653135 MHz  
 WDW EM  
 SSB 0  
 LB 1.00 Hz  
 GB 0  
 LB 1.40

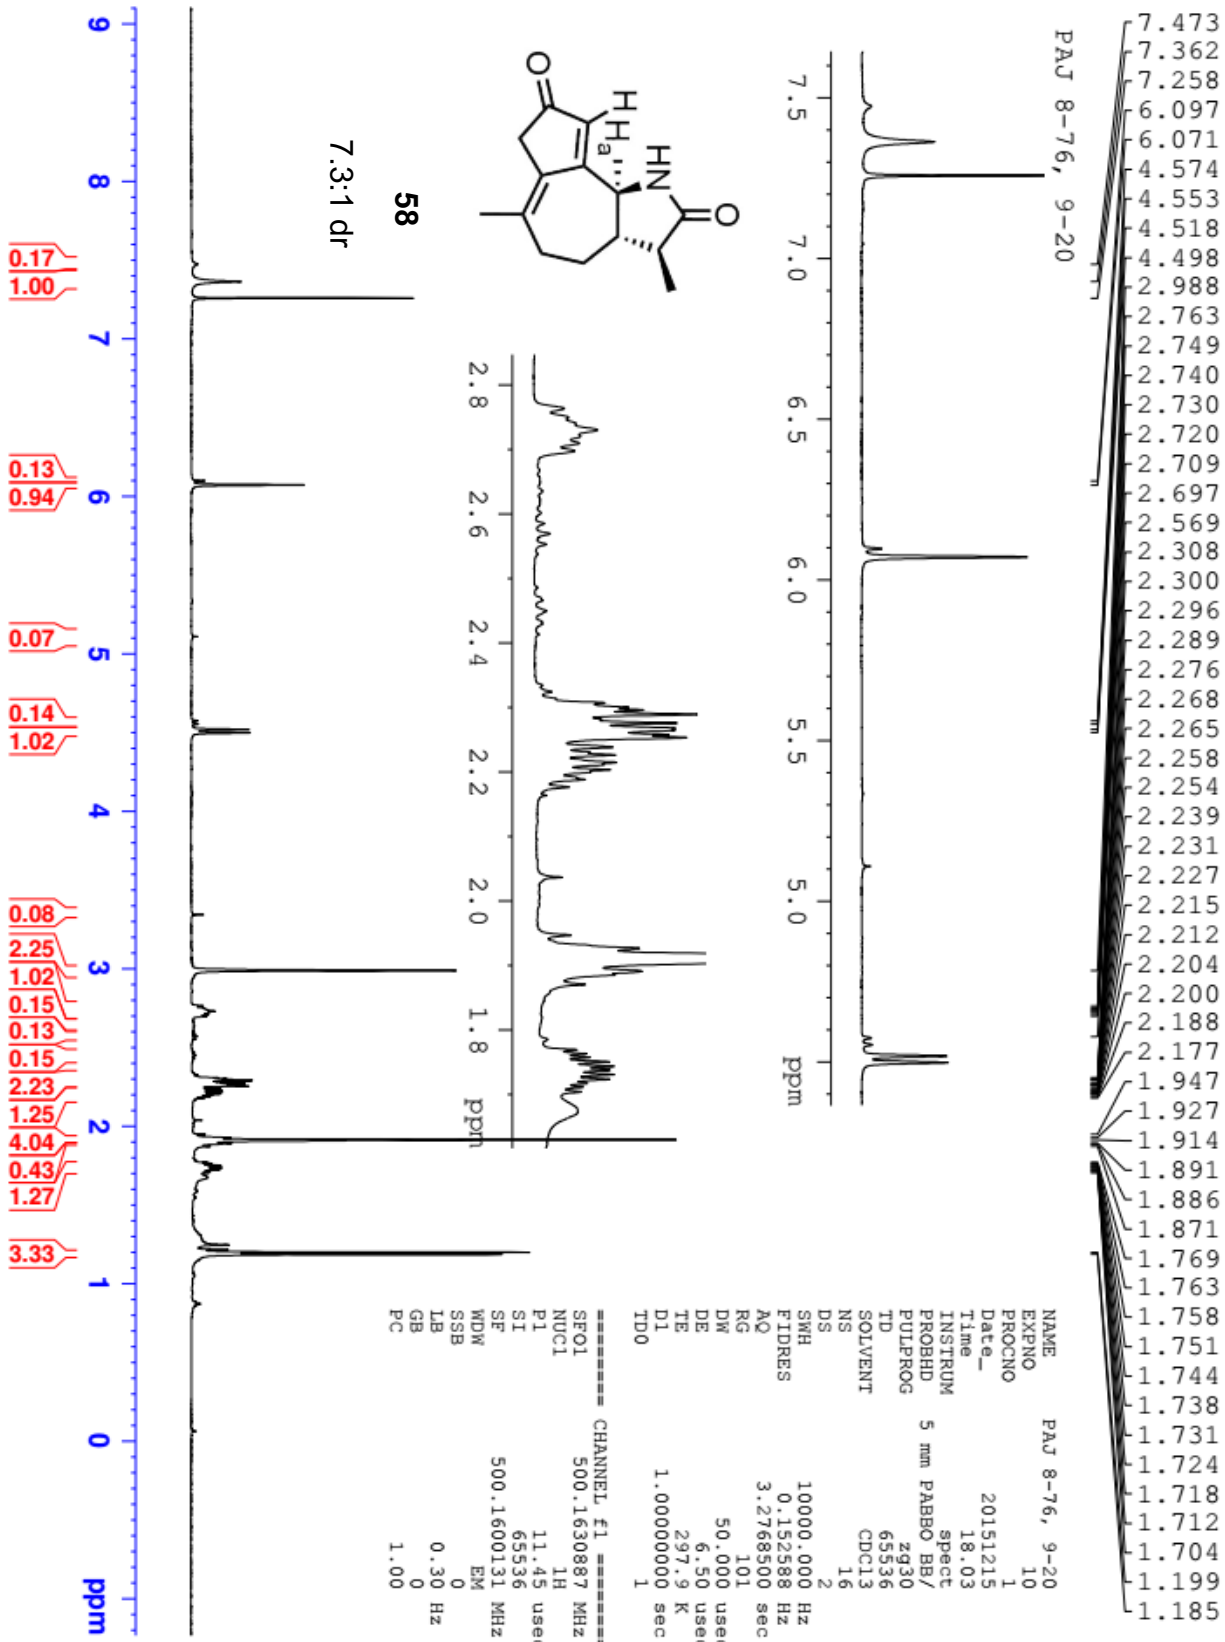

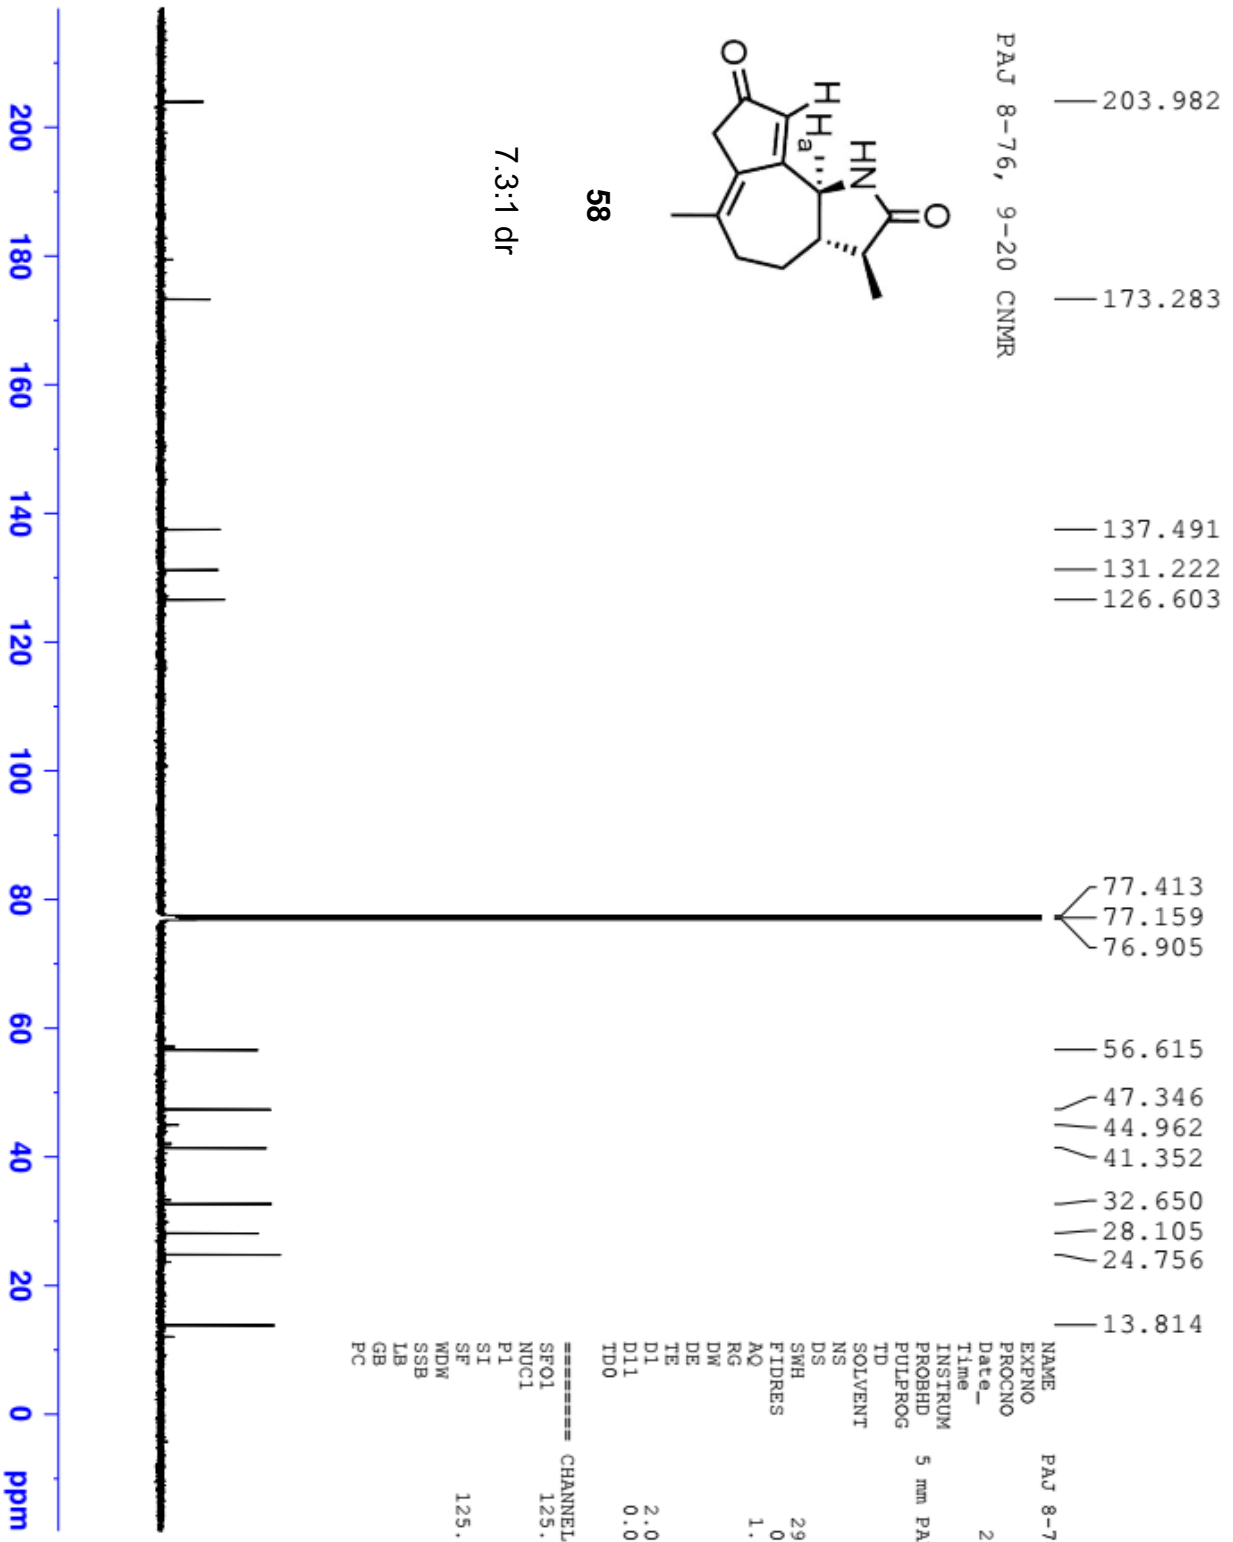

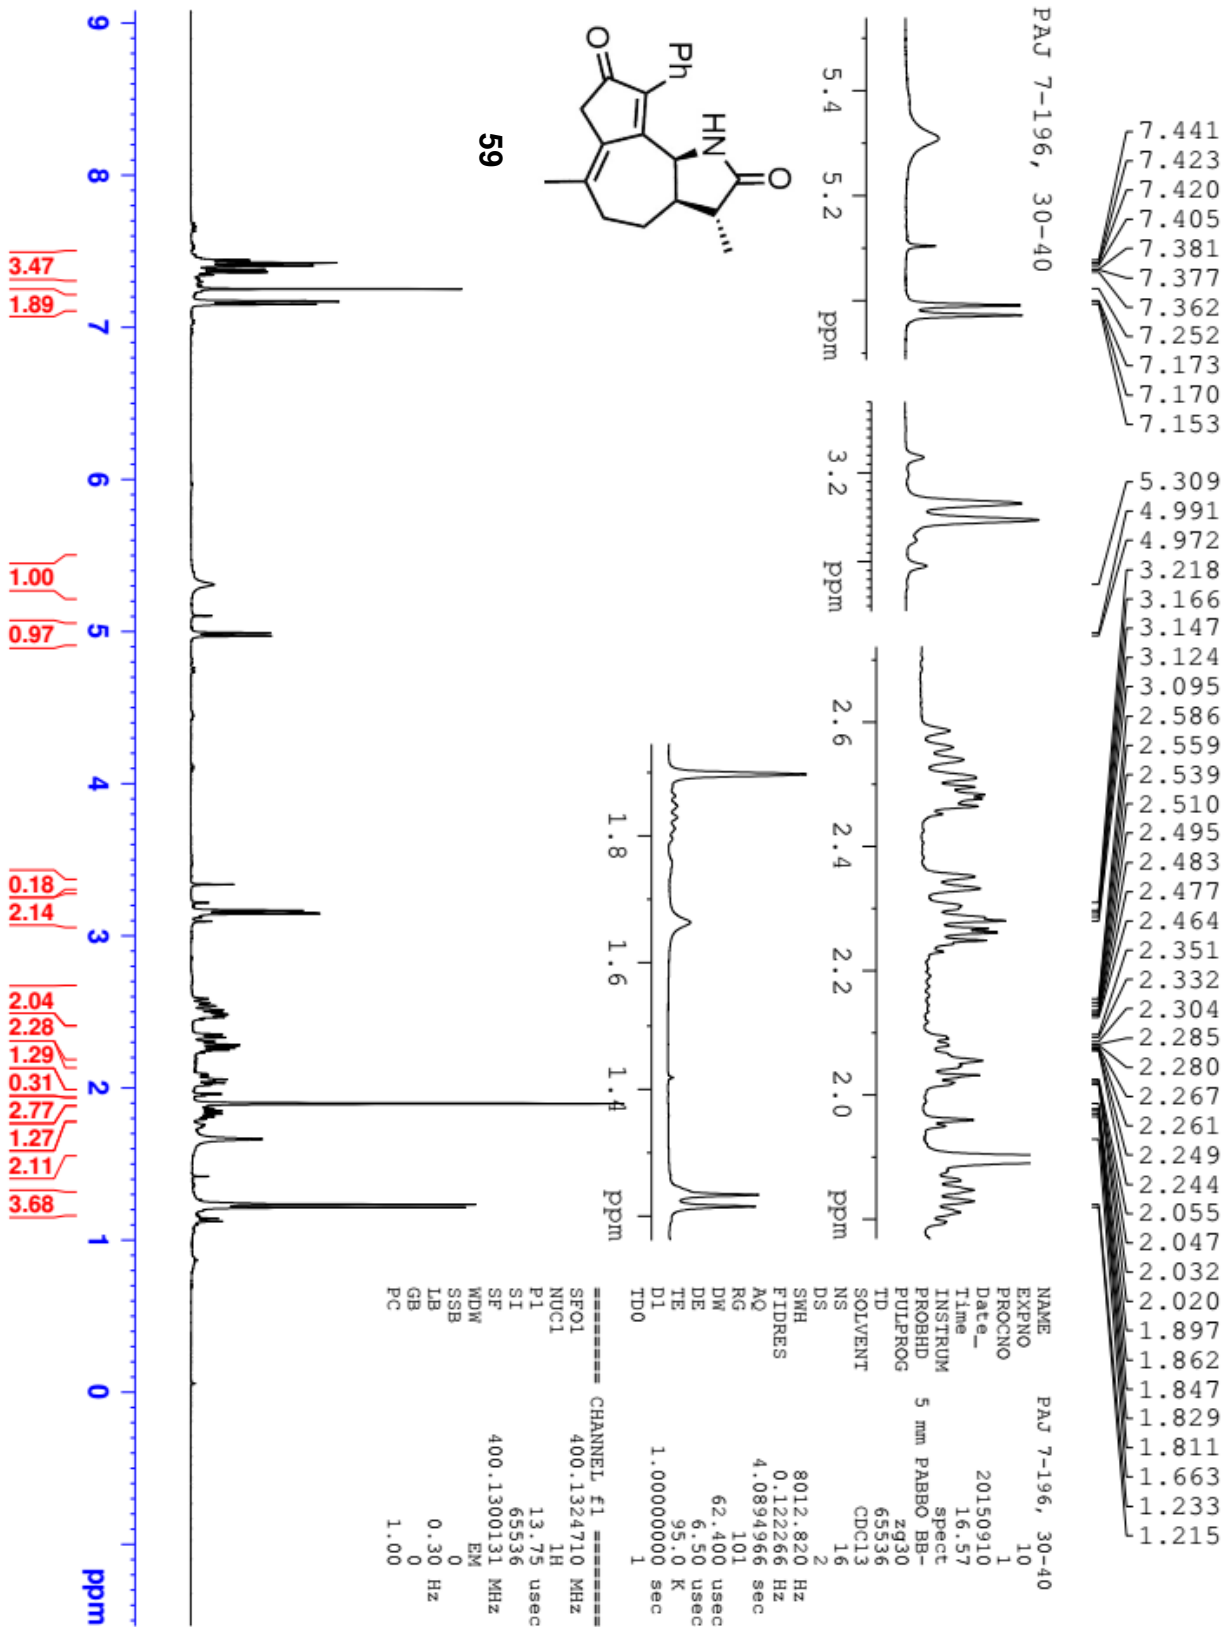

PAJ 7-196, 30-40 CNMR

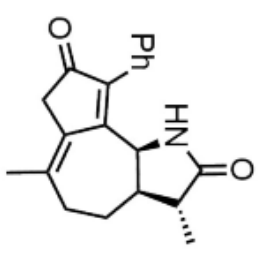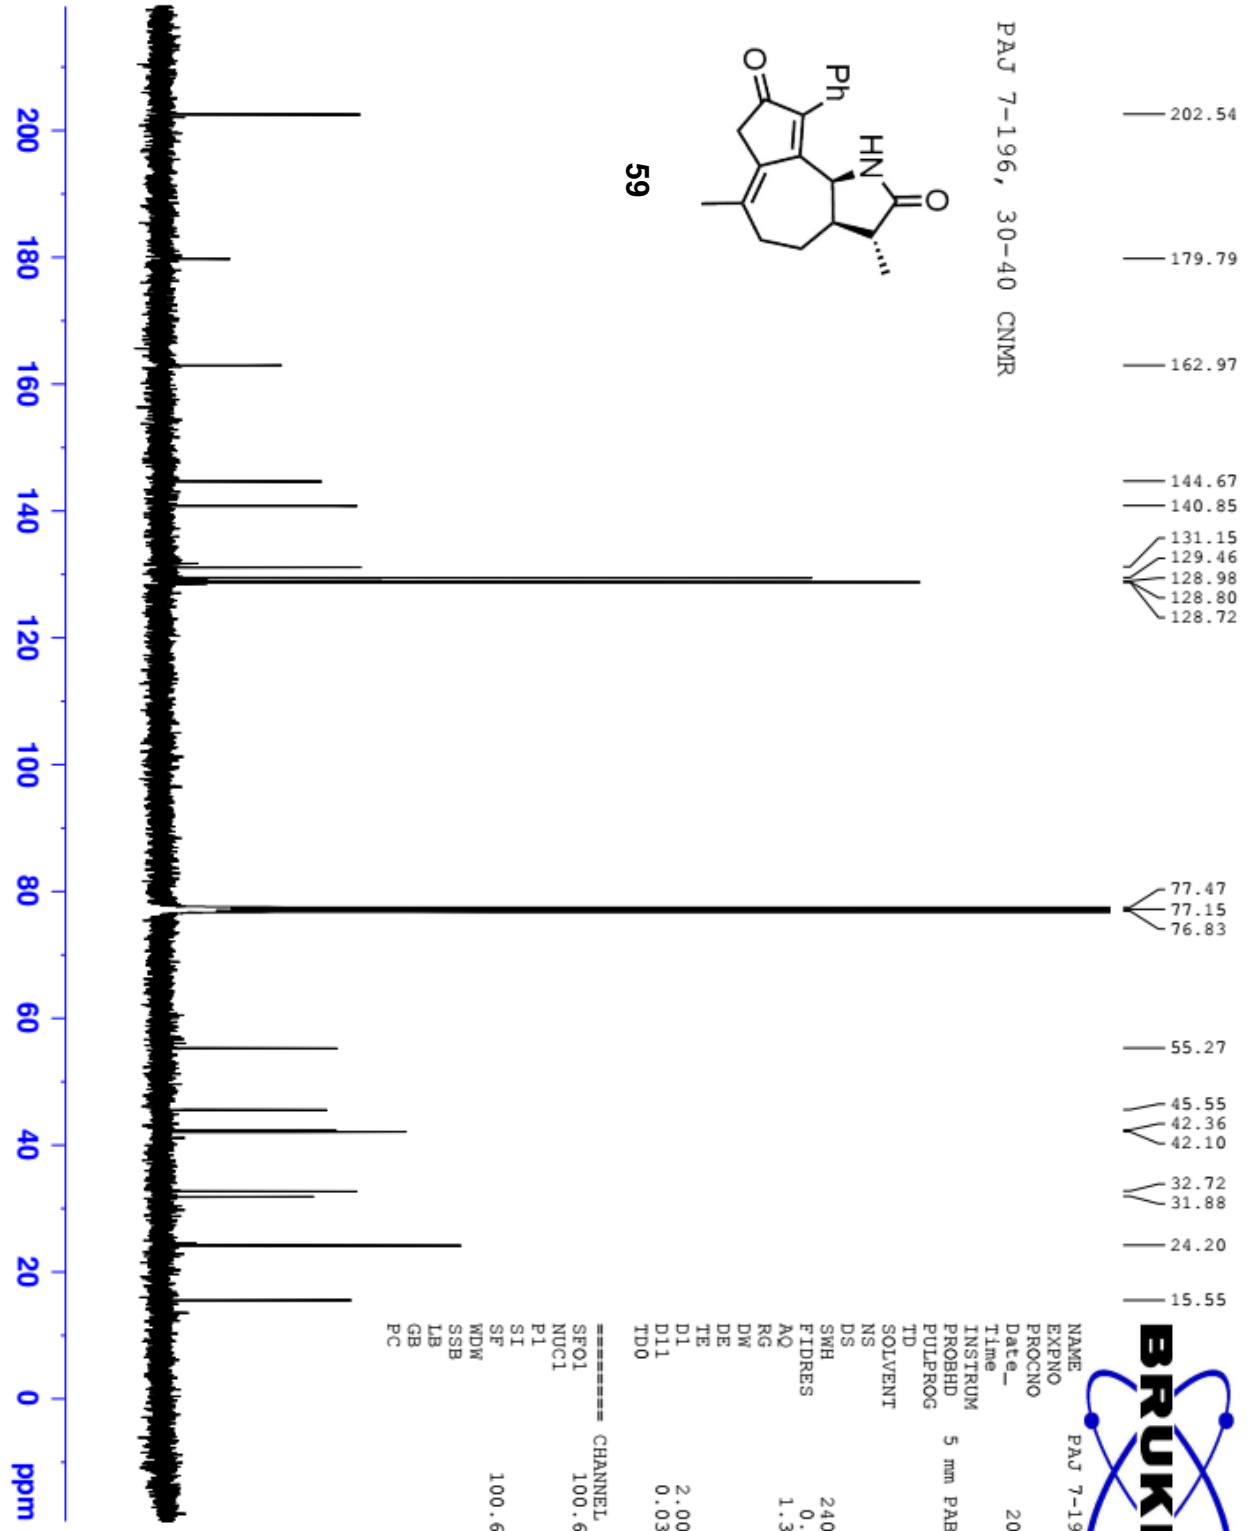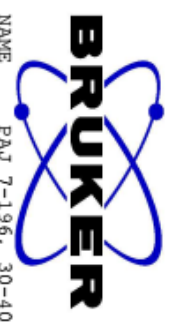

NAME PAJ 7-196, 30-40  
 EXPNO 11  
 PROCNO 1  
 Date\_ 20150910  
 Time 22.01  
 INSTRUM spect  
 PROBHD 5 mm PABBO BB-  
 PULPROG zgpg30  
 TD 65536  
 SOLVENT CDCl3  
 NS 2048  
 DS 4  
 SWH 24038.461 Hz  
 FIDRES 0.366798 Hz  
 AQ 1.3631988 sec  
 RG 181  
 DW 20.800 usec  
 DE 6.50 usec  
 TE 95.0 K  
 D1 2.00000000 sec  
 D11 0.03000000 sec  
 TDO 1

==== CHANNEL f1 =====  
 SF01 100.6228293 MHz  
 NUC1 13C  
 P1 10.00 usec  
 SI 32768  
 SF 100.6127567 MHz  
 WDW EM  
 SSB 0  
 LB 1.00 Hz  
 GB 0  
 PC 1.40

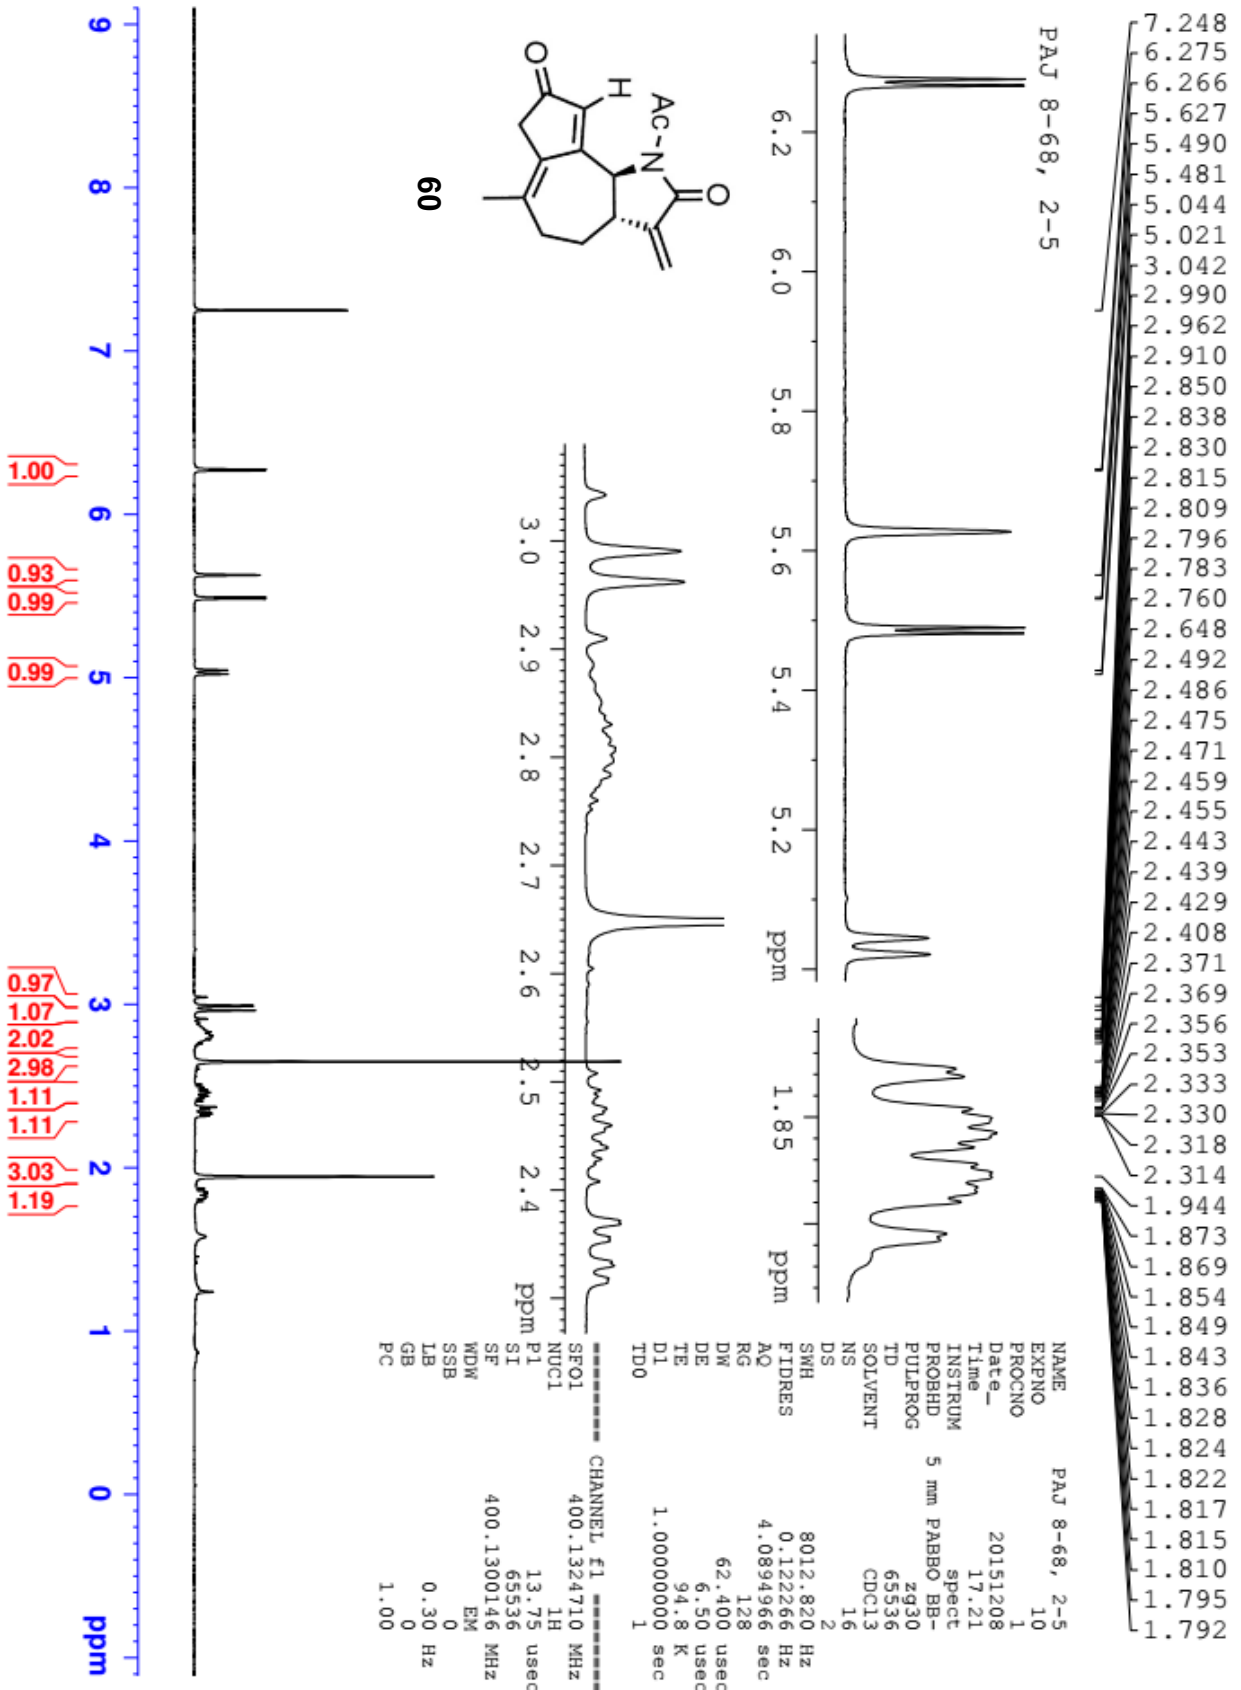

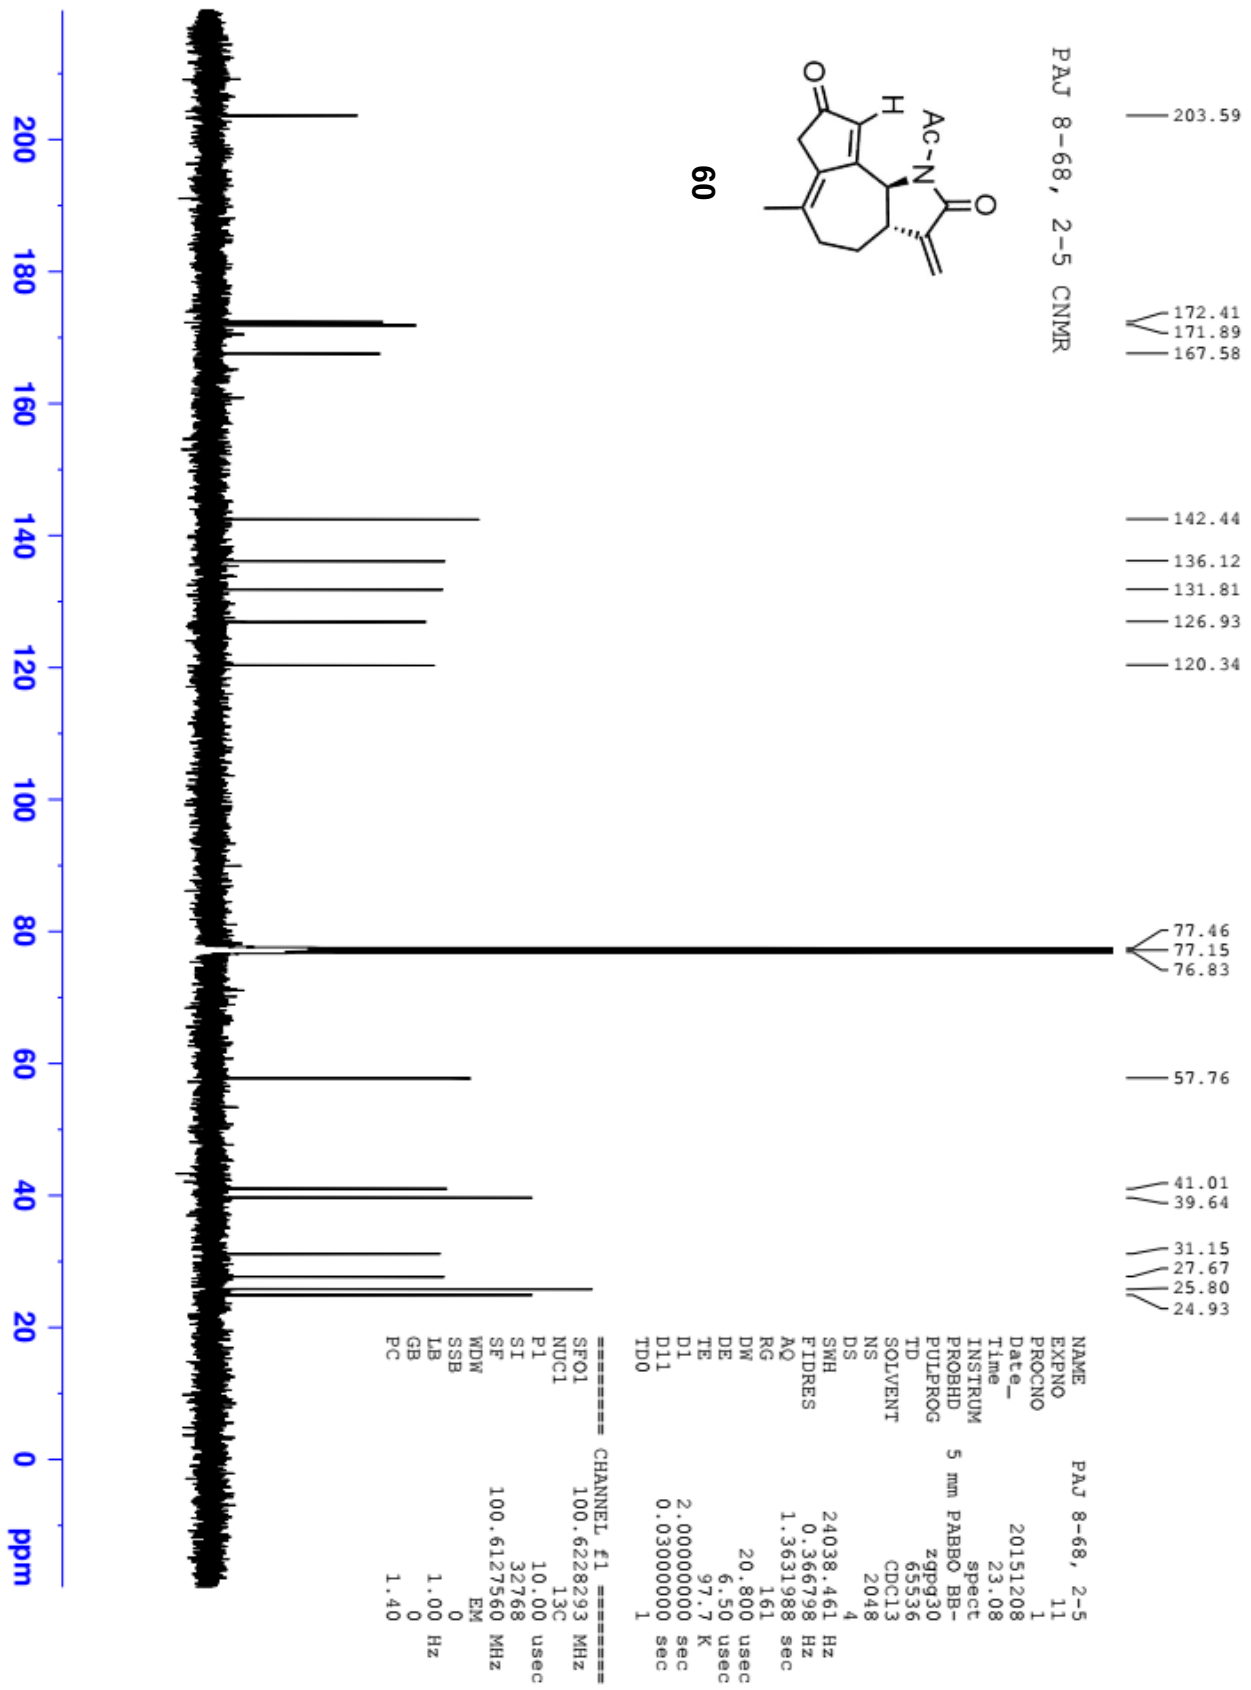



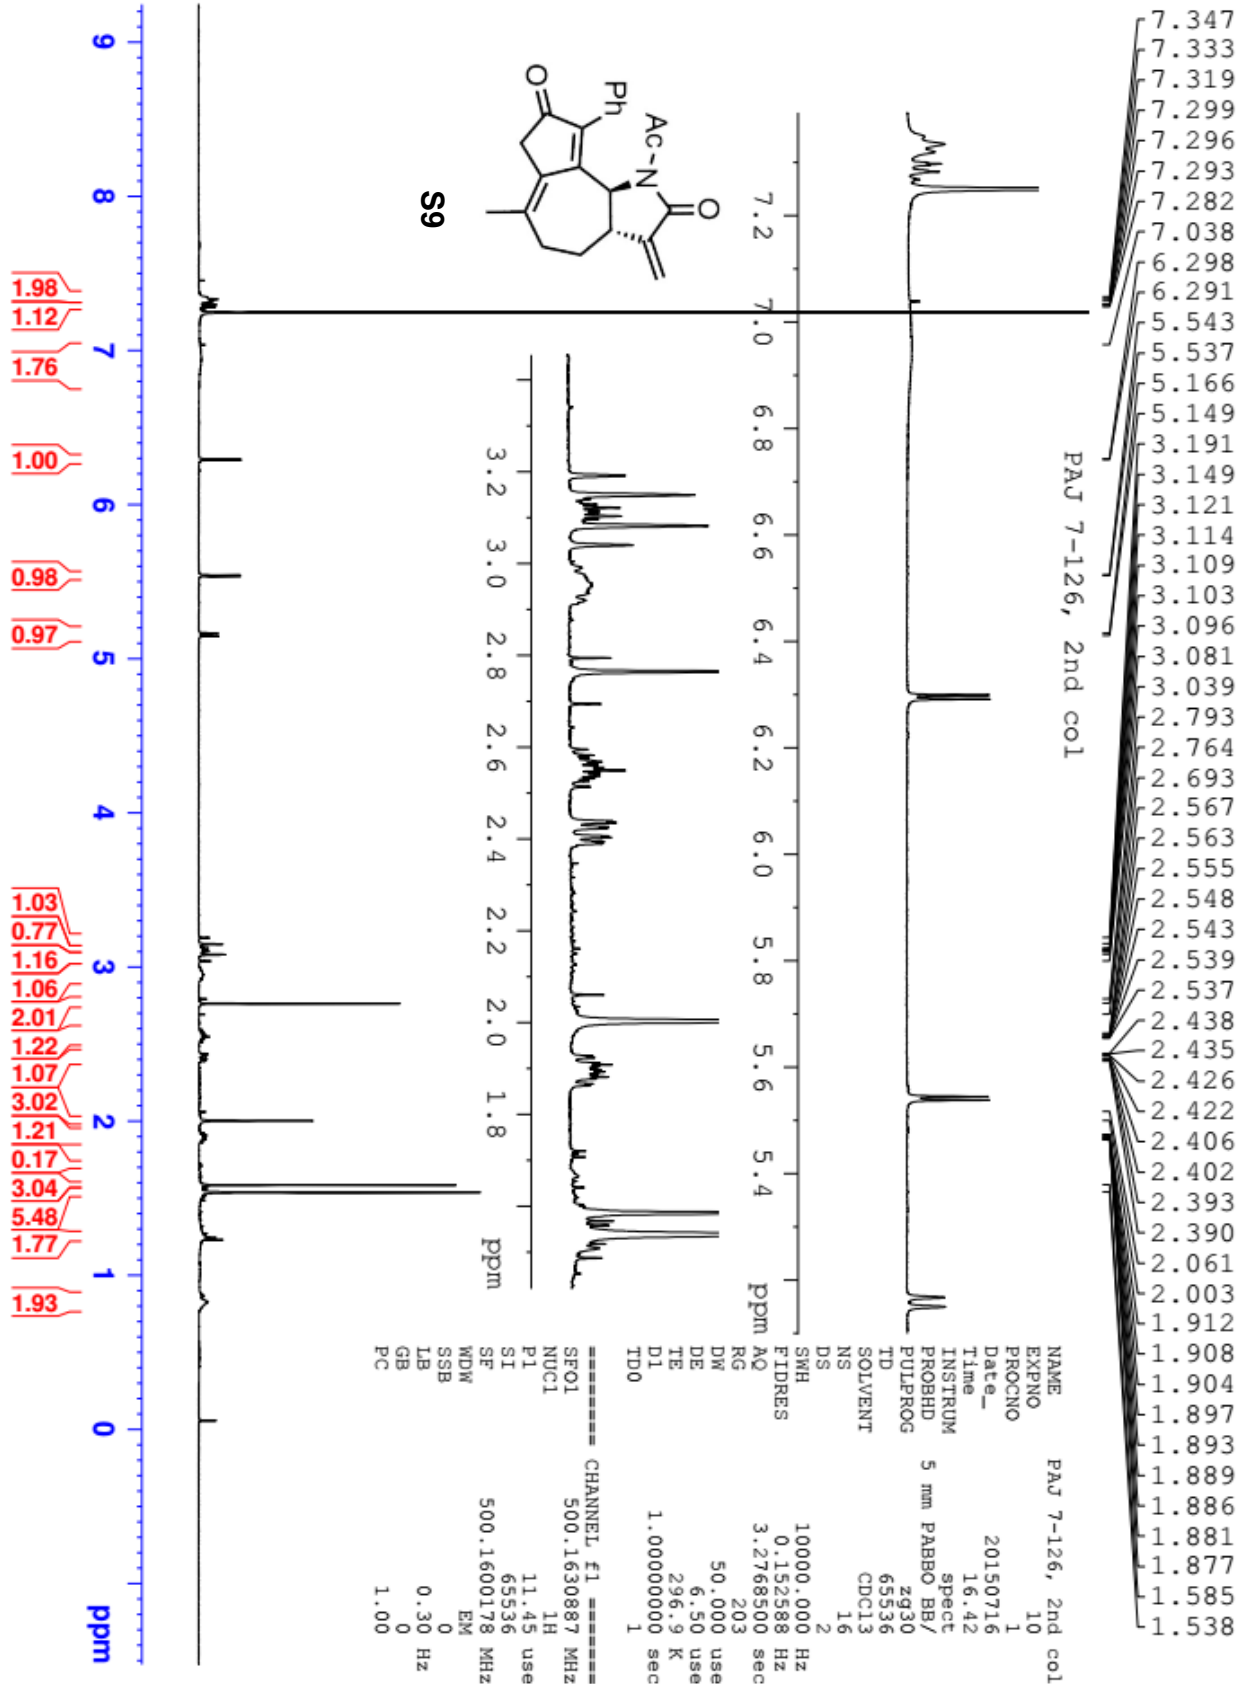

PAJ 7-126, 2nd col CNMR

202.668  
 171.803  
 166.414  
 164.488  
 142.759  
 138.256  
 135.827  
 131.166  
 131.011  
 130.597  
 127.840  
 120.636

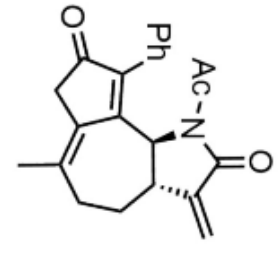

S9

77.405  
 77.151  
 76.898  
 57.400  
 40.459  
 39.735  
 31.846  
 29.717  
 28.614  
 25.711  
 23.855

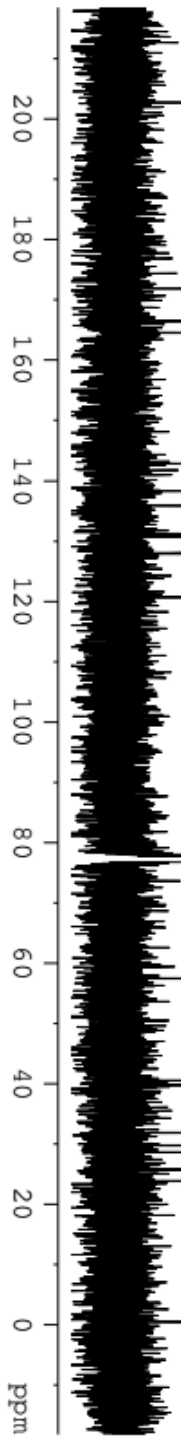

```

===== CHANNEL f1 =====
SF01      125.7779086 MHz
NUC1      13C
P1        10.50 use
SI        32768
SF        125.7653132 MHz
WDW       EM
SSB       0
LB        1.00 Hz
GB        0
PC        1.40
  
```

```

NAME      PAJ 7-126, 2nd col
EXPNO     11
PROCNO    1
Date_     20150717
Time      3.21
INSTRUM   spect
PROBHD    5 mm PABBO BB/
PULPROG   zgpg30
TD        65536
SOLVENT   CDCl3
NS        4500
DS        2
SWH        29761.904 Hz
FIDRES    0.454131 Hz
AQ        1.1010548 sec
RG        203
DW        16.800 use
DE        6.50 use
TE        298.0 K
D1        2.00000000 sec
D11       0.03000000 sec
TD0       1
  
```

7.256  
5.592  
5.035  
5.014  
3.032  
2.990  
2.957  
2.915  
2.867  
2.853  
2.841  
2.814  
2.572  
2.568  
2.405  
2.391  
2.382  
2.378  
2.368  
2.364  
2.354  
2.347  
2.340  
2.336  
2.325  
2.320  
2.309  
2.301  
2.291  
2.289  
2.274  
2.271  
2.263  
2.259  
1.929  
1.871  
1.853  
1.836  
1.832  
1.813  
1.808  
1.792  
1.707  
1.704  
1.690  
1.684  
1.680  
1.677  
1.671  
1.667  
1.662  
1.658  
1.648  
1.244  
1.230

PAJ 8-78, 8-15

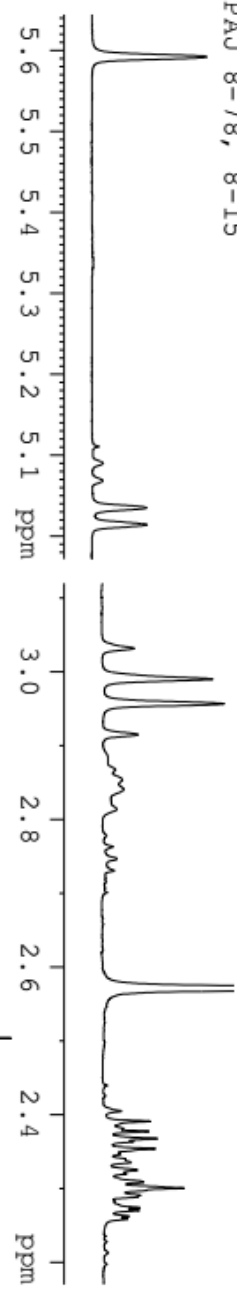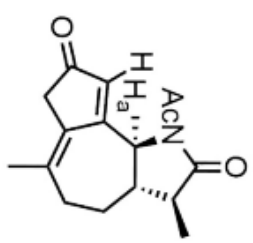

S10

4.75:1 dr

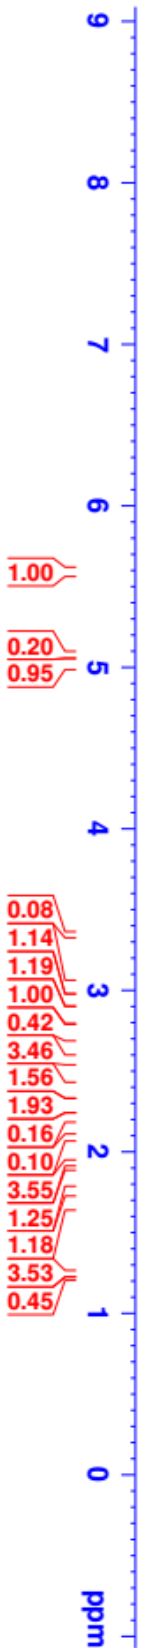

```

NAME          PAJ 8-78, 8-15
EXPNO         10
PROCNO        1
Date_         20151216
Time          18.07
INSTRUM       spect
PROBHD        5 mm PABBO BH/
PULPROG       zg30
TD            65536
SOLVENT       CDCl3
NS            16
DS            2
SMH           10000.000 Hz
FIDRES        0.152588 Hz
AQ            3.2768500 sec
RG            203
DW            50.000 usec
DE            6.50 usec
TE            298.3 K
D1            1.00000000 sec
TD0           1

===== CHANNEL f1 =====
SF01          500.1630887 MHz
NUC1          1H
P1            11.45 usec
SI            65536
SF            500.1600142 MHz
WDW           EM
SSB           0
LB            0.30 Hz
GB            0
PC            1.00
  
```

PAJ 8-78, 8-15 CNMR

- 203.712
- 177.103
- 172.459
- 171.672
- 136.454
- 131.660
- 127.058
- 77.414
- 77.160
- 76.905
- 65.988
- 58.262
- 45.682
- 42.331
- 41.048
- 31.576
- 29.030
- 25.441
- 24.725
- 15.416
- 13.666

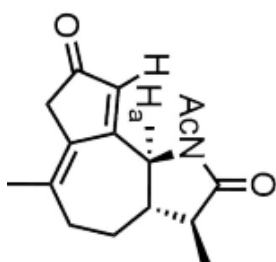

S10

4.75:1 dr

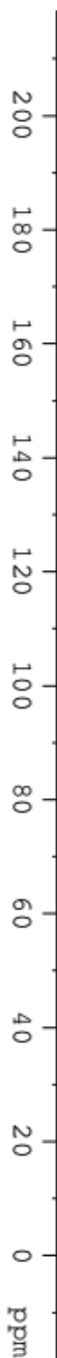

|         |                |
|---------|----------------|
| NAME    | PAJ 8-78, 8-15 |
| EXPNO   | 11             |
| PROCNO  | 1              |
| Date_   | 20151217       |
| Time    | 0.44           |
| INSTRUM | spect          |
| PROBHD  | 5 mm PABBO BB/ |
| PULPROG | zgpg30         |
| TD      | 65536          |
| SOLVENT | CDC13          |
| NS      | 2500           |
| DS      | 2              |
| SWH     | 29761.904 Hz   |
| FIDRES  | 0.454131 Hz    |
| AQ      | 1.1010548 sec  |
| RG      | 203            |
| DW      | 16.800 use     |
| DE      | 6.50 use       |
| TE      | 299.3 K        |
| D1      | 2.00000000 sec |
| D11     | 0.03000000 sec |
| TD0     | 1              |

|                        |                 |
|------------------------|-----------------|
| ===== CHANNEL f1 ===== |                 |
| SFO1                   | 125.7779086 MHz |
| NUC1                   | 13C             |
| P1                     | 10.50 use       |
| SI                     | 32768           |
| SF                     | 125.7653118 MHz |
| WDW                    | EM              |
| SSB                    | 0               |
| LB                     | 1.00 Hz         |
| GB                     | 0               |
| PC                     | 1.40            |

7.331  
7.320  
7.318  
7.313  
7.307  
7.303  
7.297  
7.283  
7.276  
7.268  
7.257  
7.229  
7.224  
7.213  
4.671  
4.651  
4.505  
4.488  
3.172  
3.165  
3.158  
3.148  
3.142  
3.132  
3.113  
3.071  
2.982  
2.940  
2.934  
2.834  
2.818  
2.810  
2.794  
2.622  
2.503  
2.489  
2.483  
2.475  
2.466  
2.458  
2.447  
2.354  
2.348  
2.343  
2.338  
2.329  
2.321  
2.316  
2.310  
2.307  
1.978  
1.948  
1.900  
1.374  
1.369

PAJ 8-130, 23-32

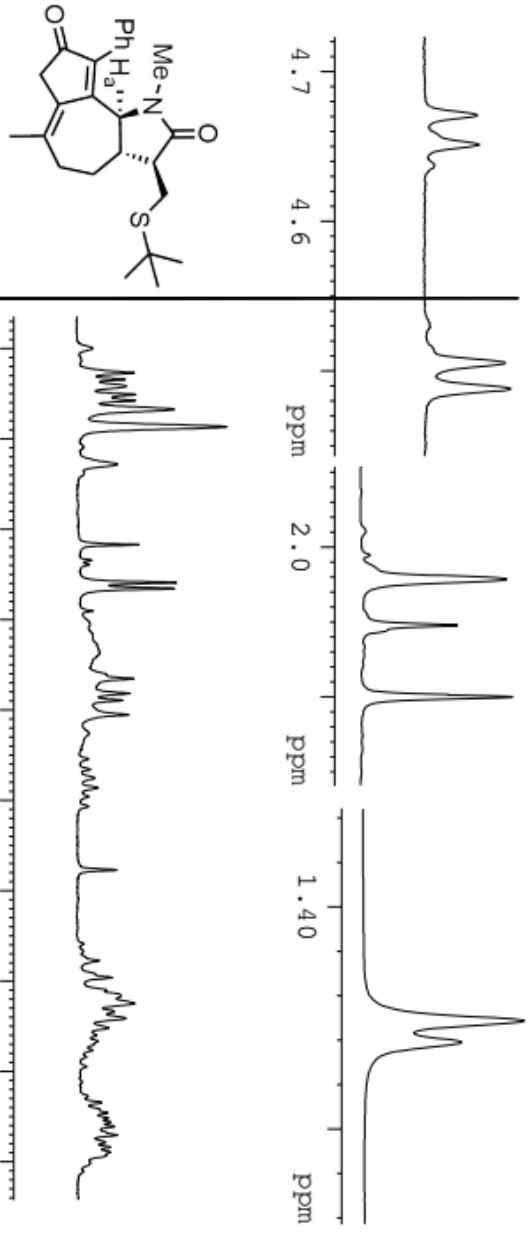

S11  
1.6:1 dr

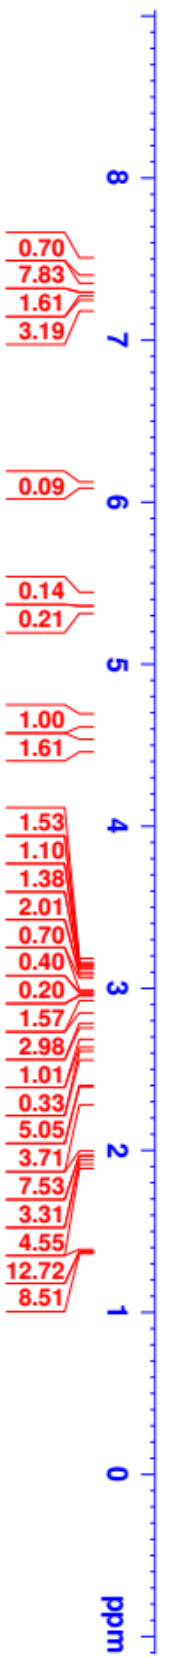

```

NAME          PAJ 8-130, 23-32
EXPNO         10
PROCNO        1
Date_         20160223
Time          18.24
INSTRUM       spect
PROBHD        5 mm PABBO BB/
PULPROG       zg30
TD            65536
SOLVENT       CDCl3
NS            16
DS            2
SMH           10000.000 Hz
FIDRES        0.152588 Hz
AQ            3.2768500 sec
RG            203
DW            50.000 usec
DE            6.50 usec
TE            297.6 K
D1            1.00000000 sec
TD0           1

===== CHANNEL f1 =====
SF01          500.1630887 MHz
NUC1          1H
P1            11.45 usec
SI            65536
SF           500.1600141 MHz
WDW           EM
SSB           0
LB            0.30 Hz
GB            0
PC            1.00
  
```

- 202.921
- 202.856
- 175.252
- 166.107
- 138.496
- 137.710
- 137.078
- 130.809
- 130.729
- 130.667
- 130.556
- 128.486
- 128.363
- 127.660
- 127.610
- 77.414
- 77.160
- 76.906
- 76.443
- 62.735
- 61.667
- 50.226
- 44.170
- 43.178
- 42.749
- 42.564
- 40.587
- 40.547
- 34.295
- 33.404
- 32.648
- 31.070
- 31.032
- 30.785
- 30.417
- 30.323
- 30.303

PAJ 8-130, 23-32 CNMR

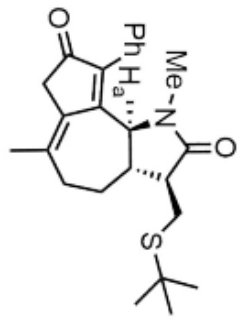

1.6:1 dr

S11

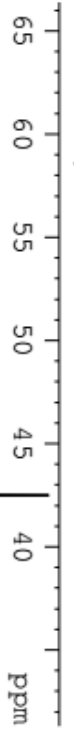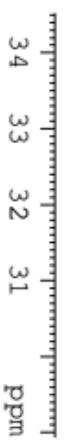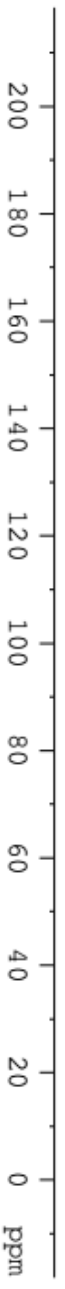

|         |                  |
|---------|------------------|
| NAME    | PAJ 8-130, 23-32 |
| EXPNO   | 11               |
| PROCNO  | 1                |
| Date_   | 20160224         |
| Time    | 0.15             |
| INSTRUM | spect            |
| PROBHD  | 5 mm PABBO BB/   |
| PULPROG | zgpg30           |
| TD      | 65536            |
| SOLVENT | CDCl3            |
| NS      | 3500             |
| DS      | 2                |
| SWH     | 29761.904 Hz     |
| FIDRES  | 0.454131 Hz      |
| AQ      | 1.1010548 sec    |
| RG      | 203              |
| DW      | 16.800 usec      |
| DE      | 6.50 usec        |
| TE      | 298.3 K          |
| D1      | 2.0000000 sec    |
| D11     | 0.0300000 sec    |
| TD0     | 1                |

  

|                        |
|------------------------|
| ===== CHANNEL f1 ===== |
| SFO1 125.7779086 MHZ   |
| NUC1 13C               |
| P1 10.50 usec          |
| SI 32768               |
| SF 125.7653125 MHZ     |
| WDW EM                 |
| SSB 0                  |
| LB 1.00 Hz             |
| GB 0                   |
| PC 1.40                |

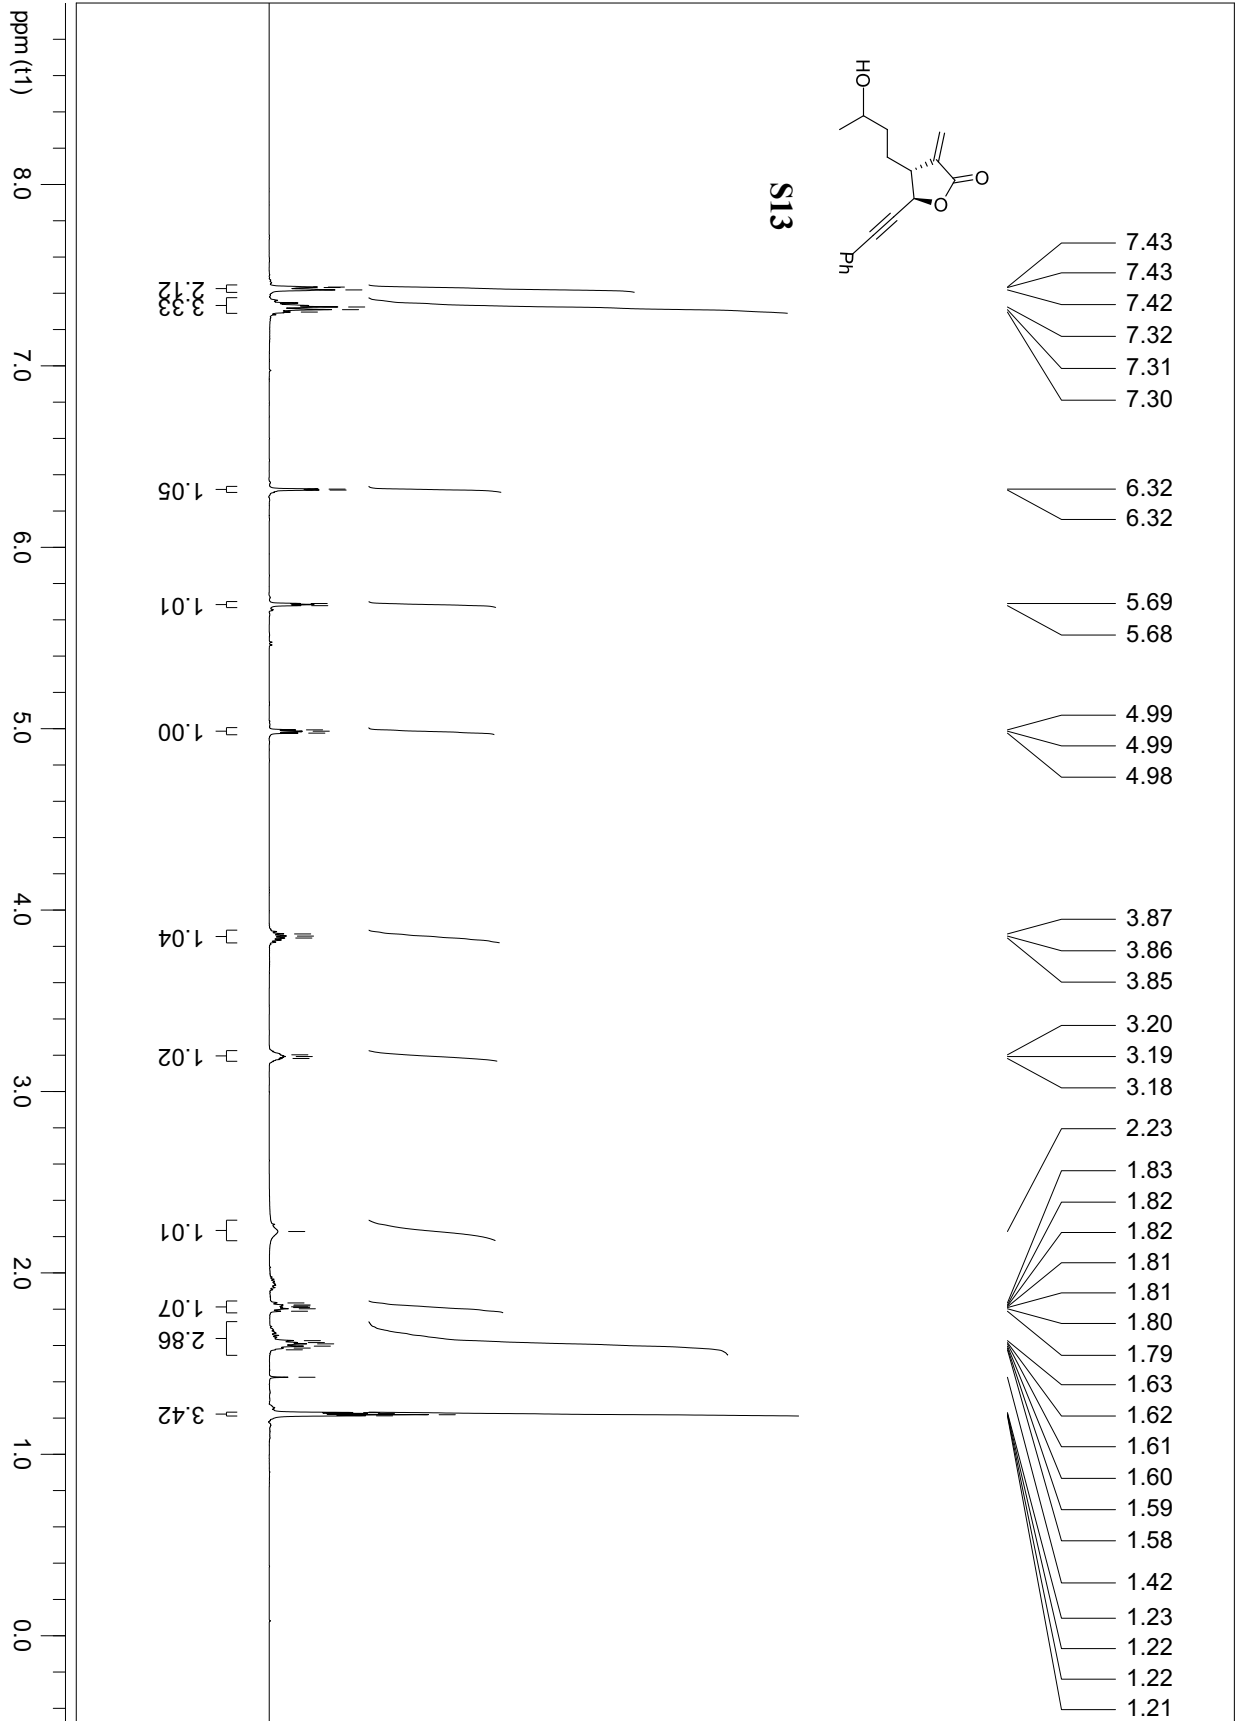

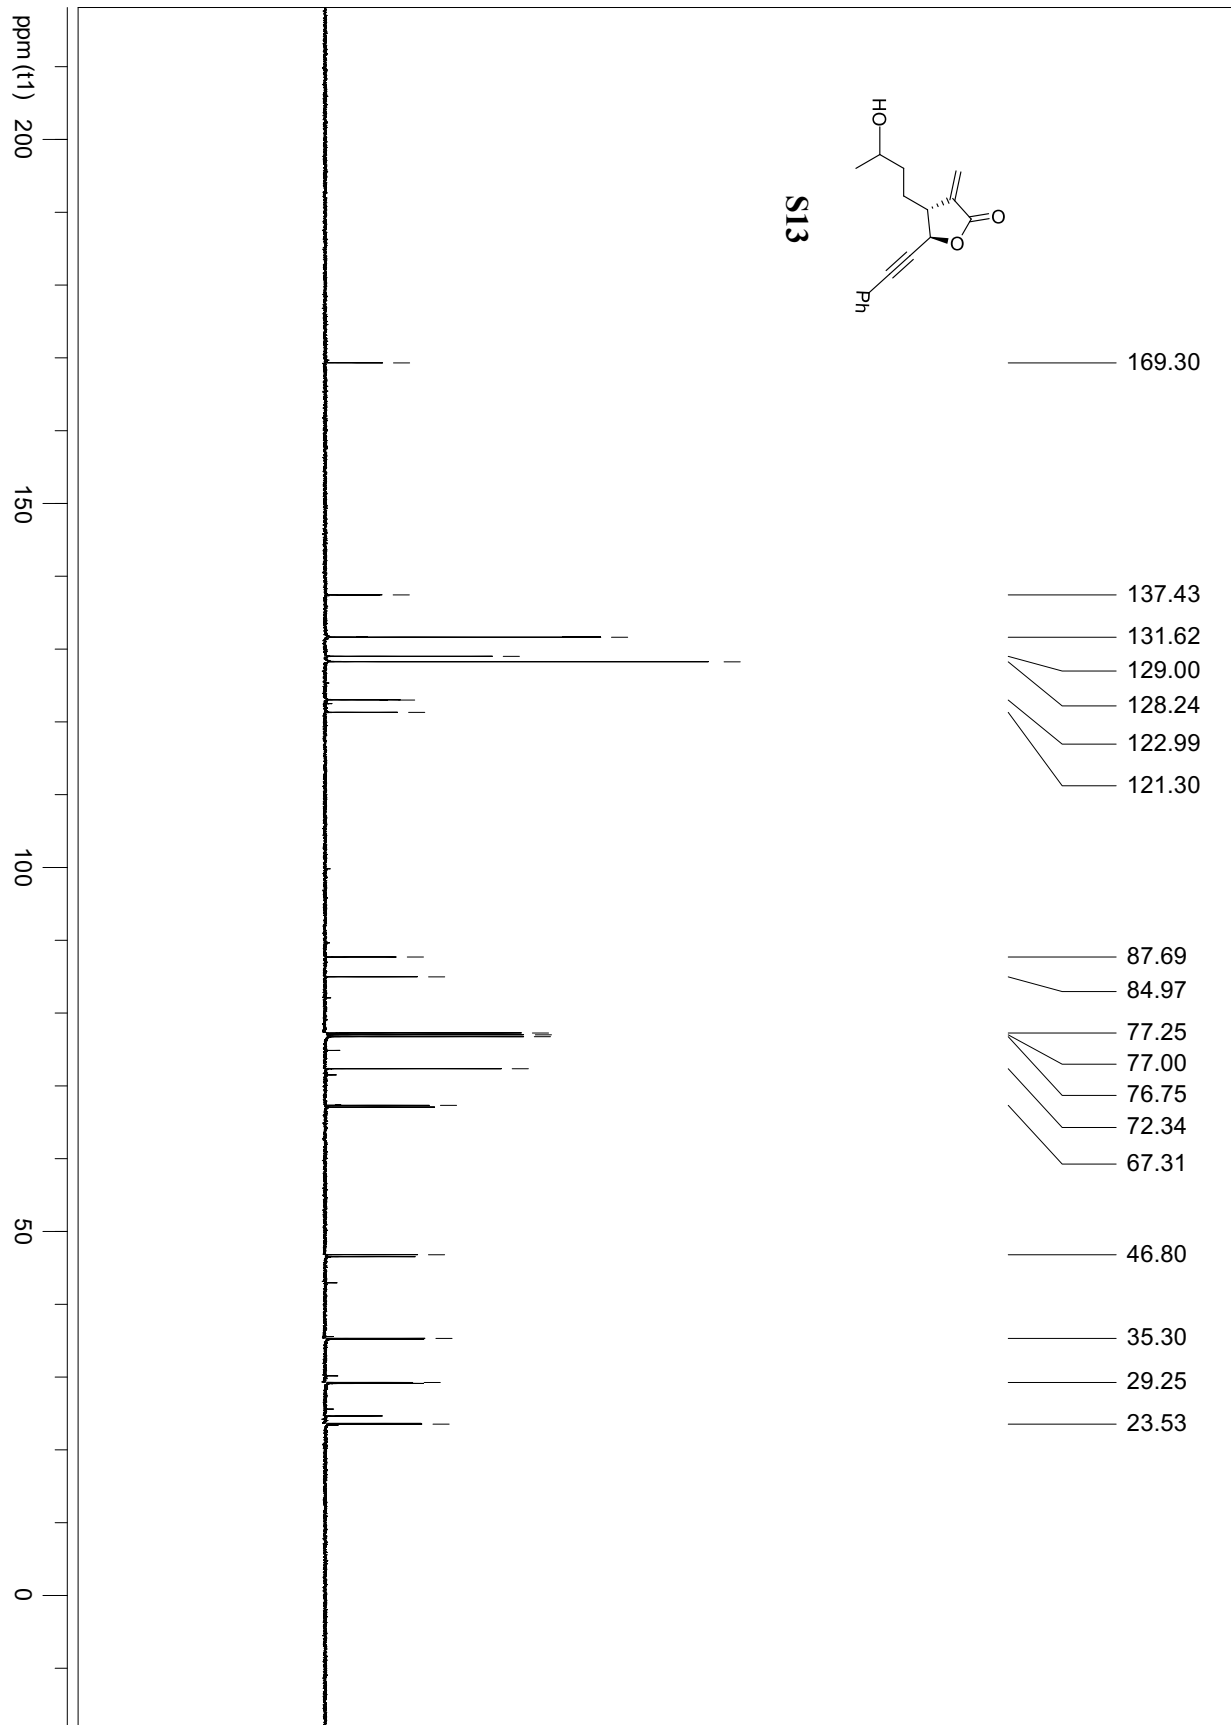



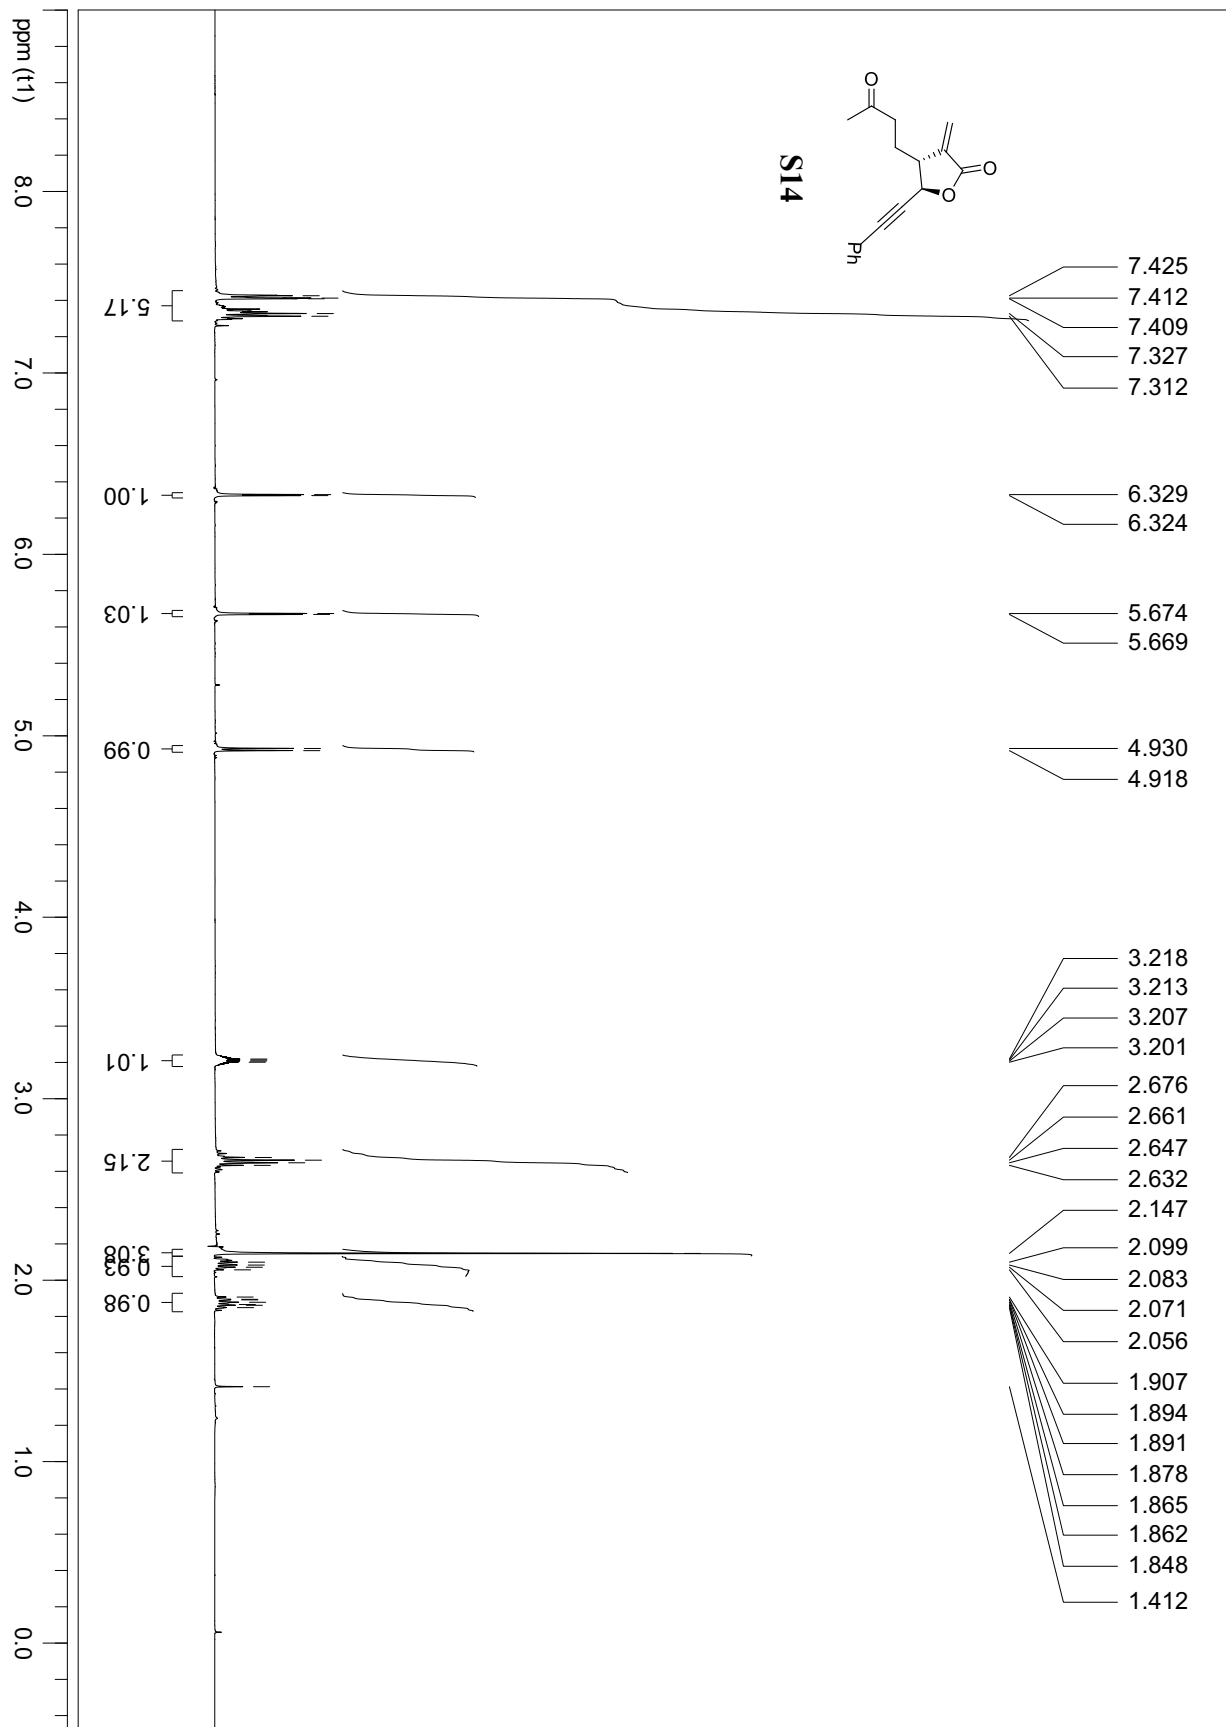

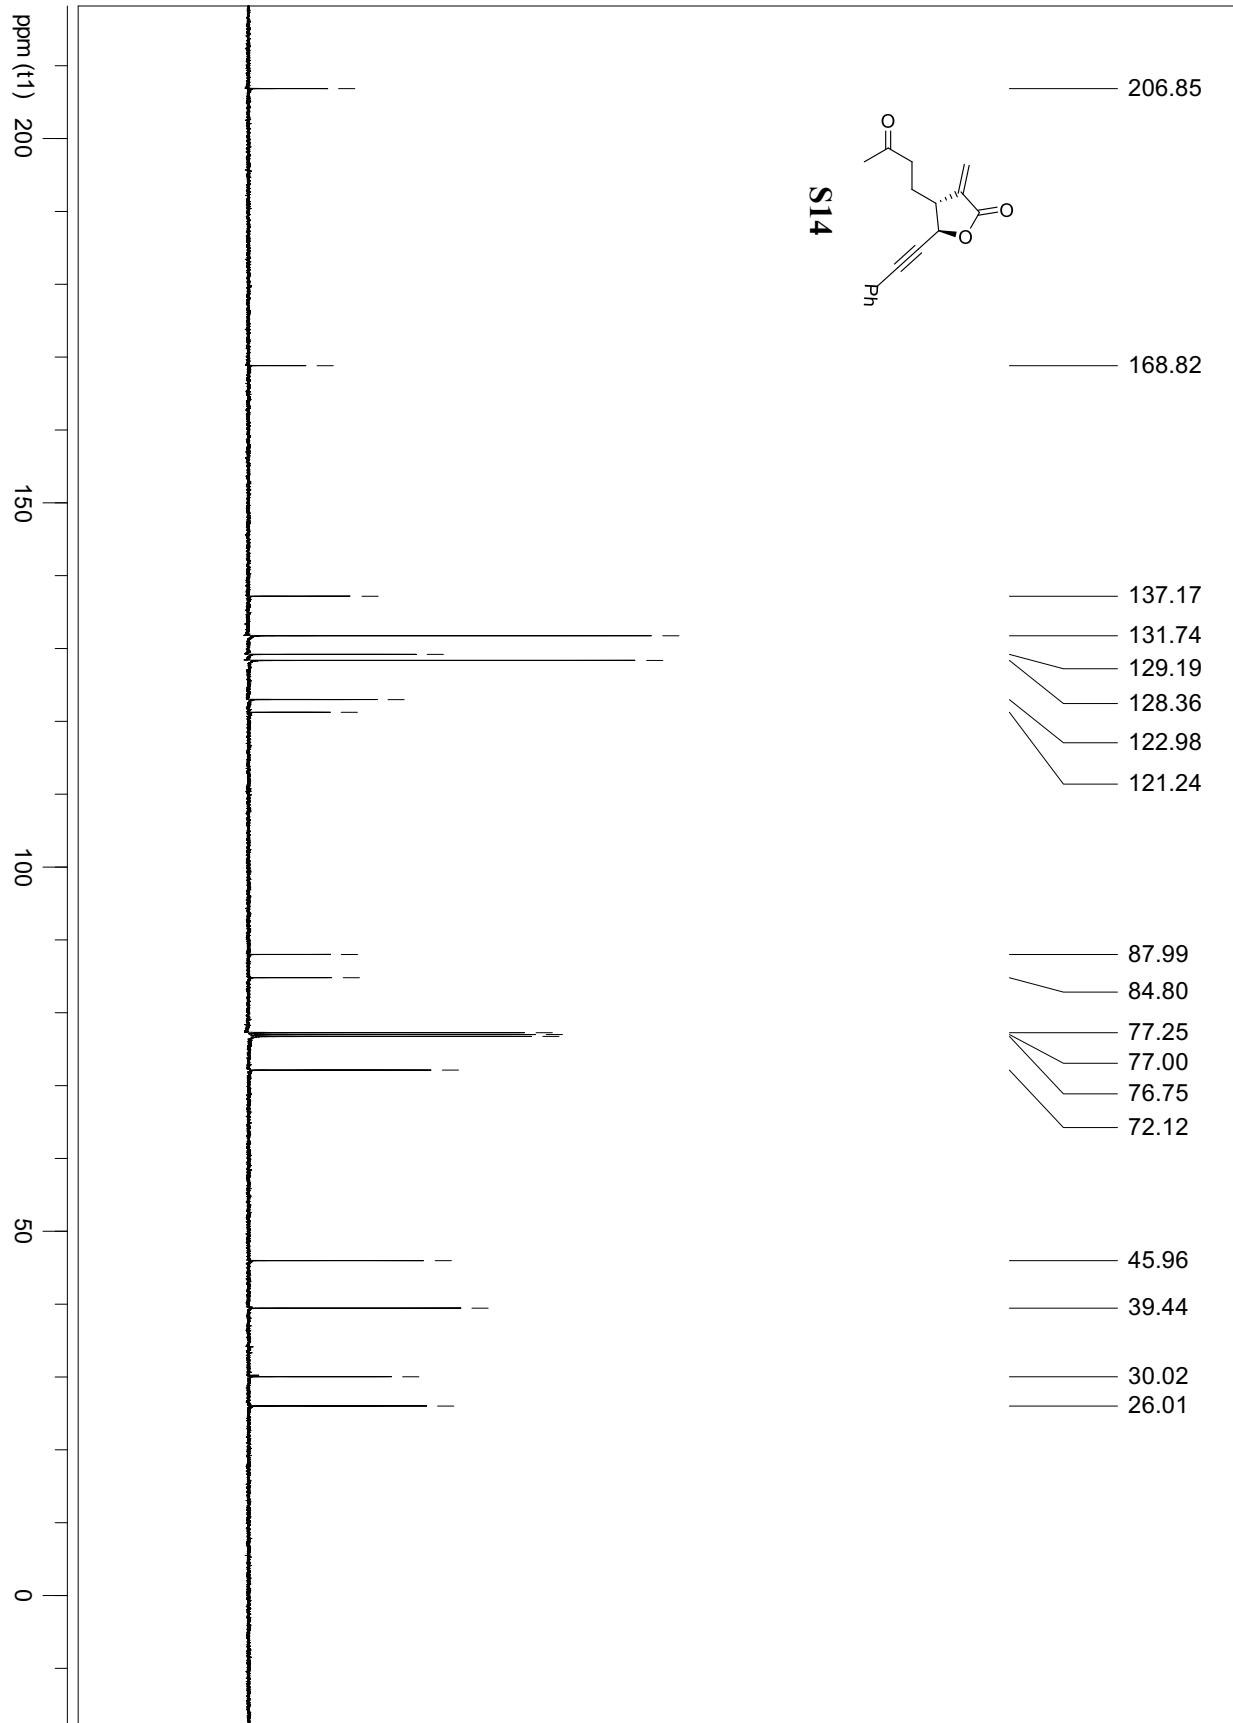

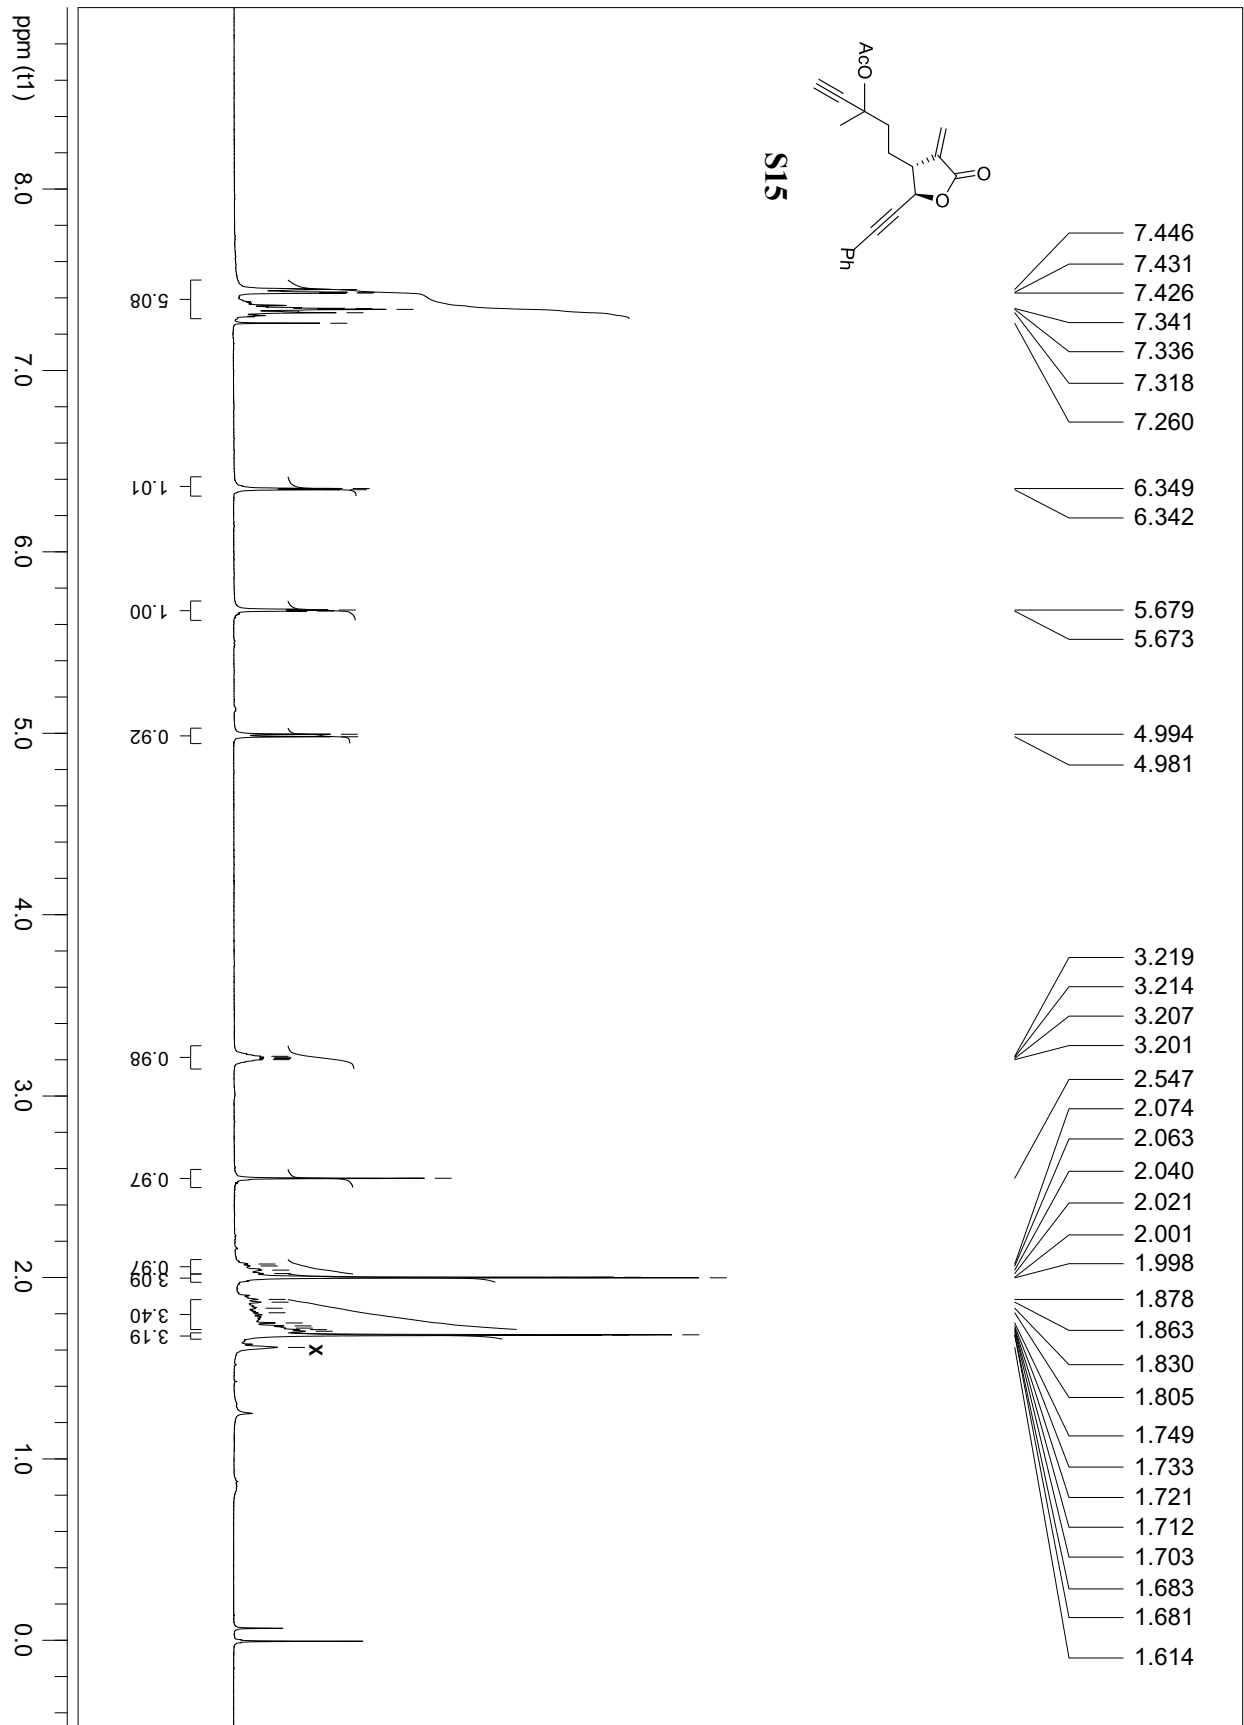

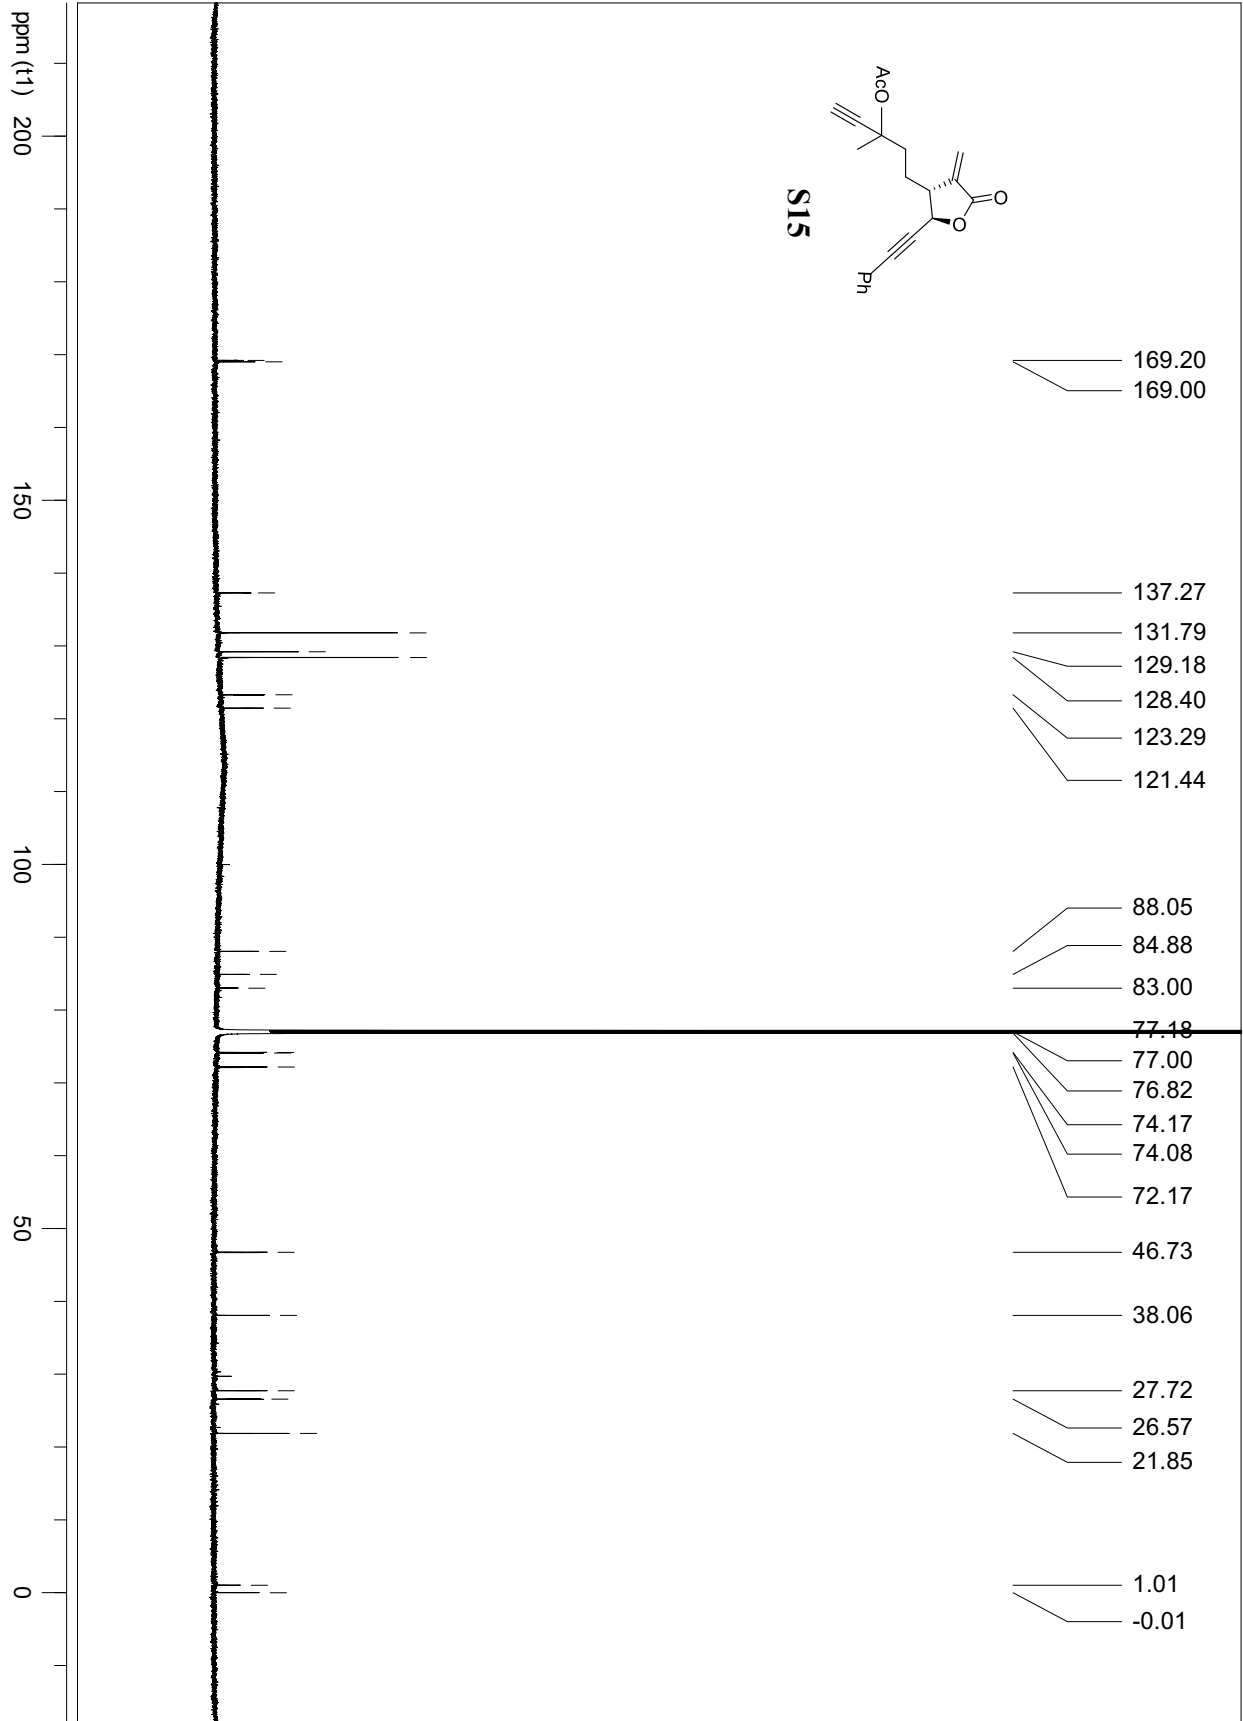

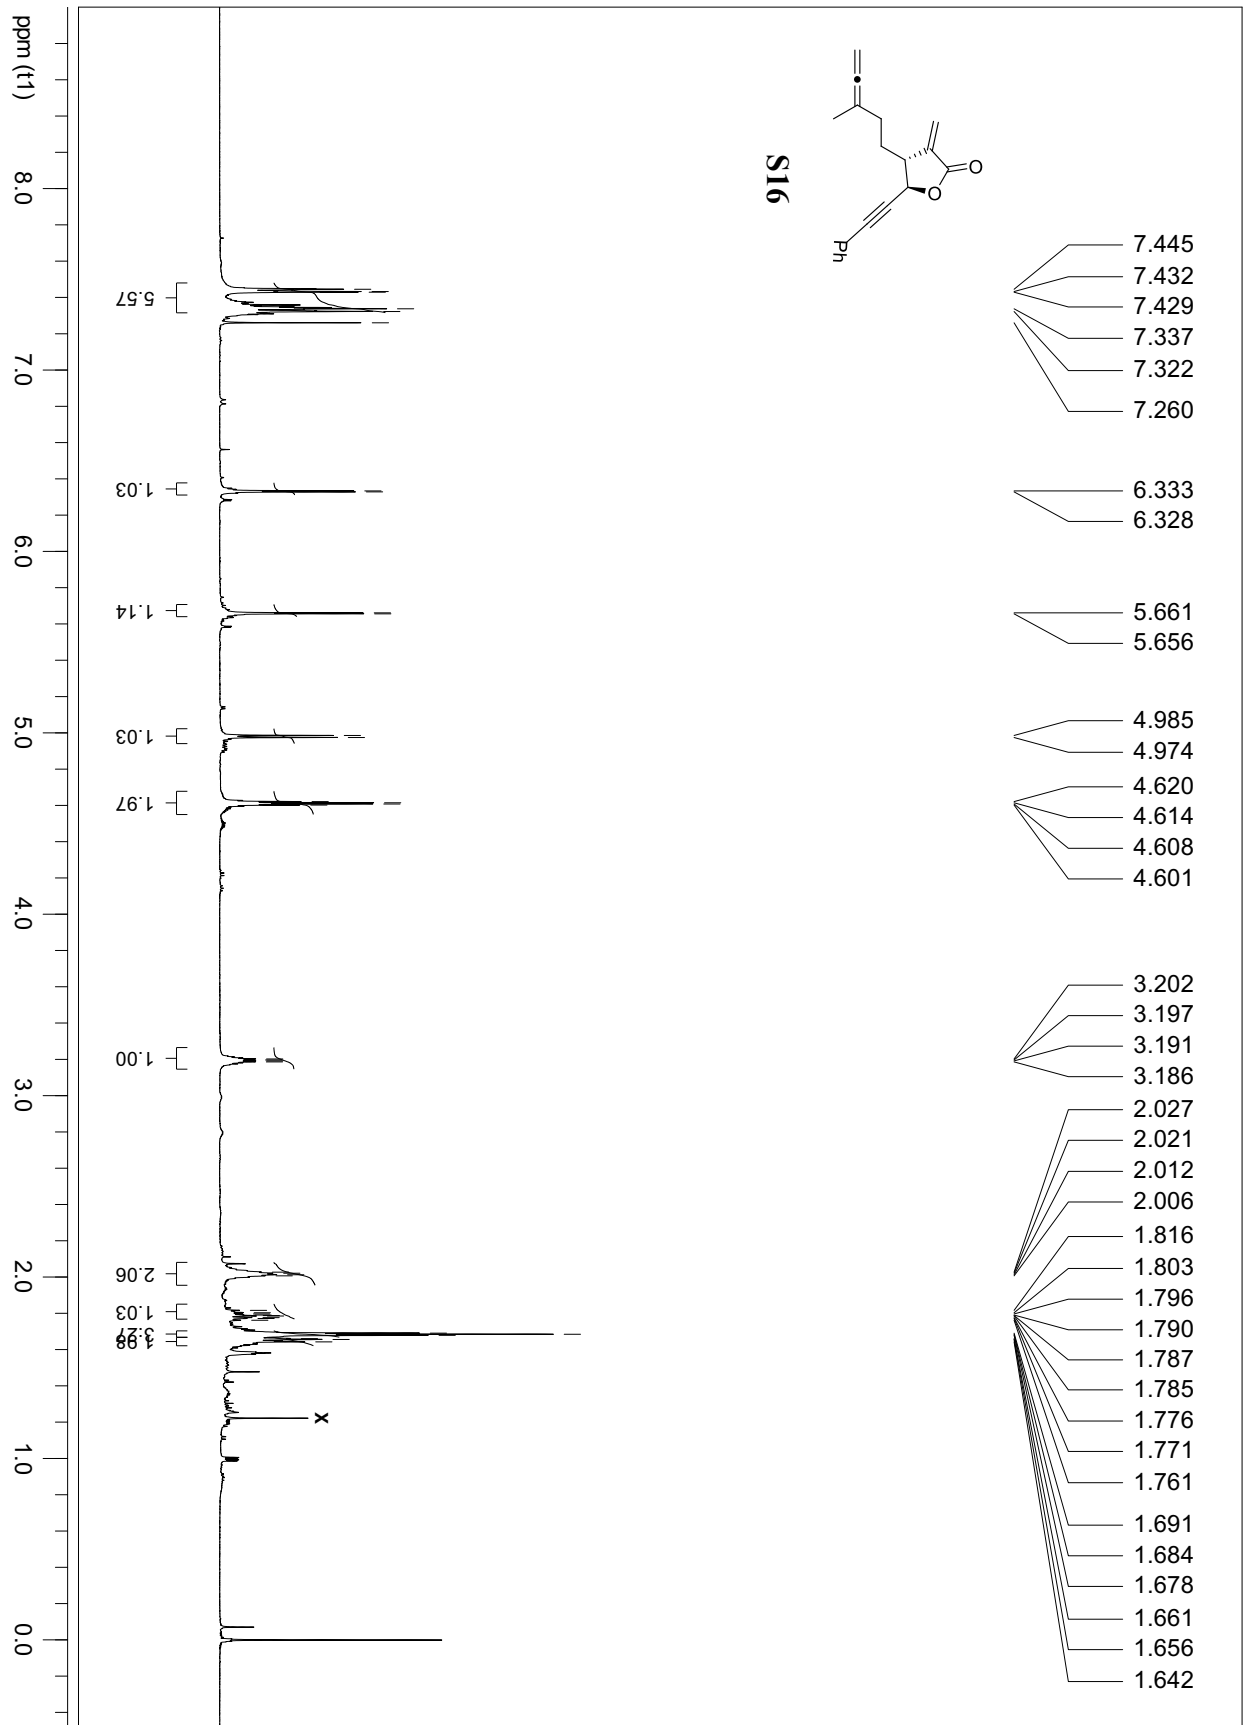

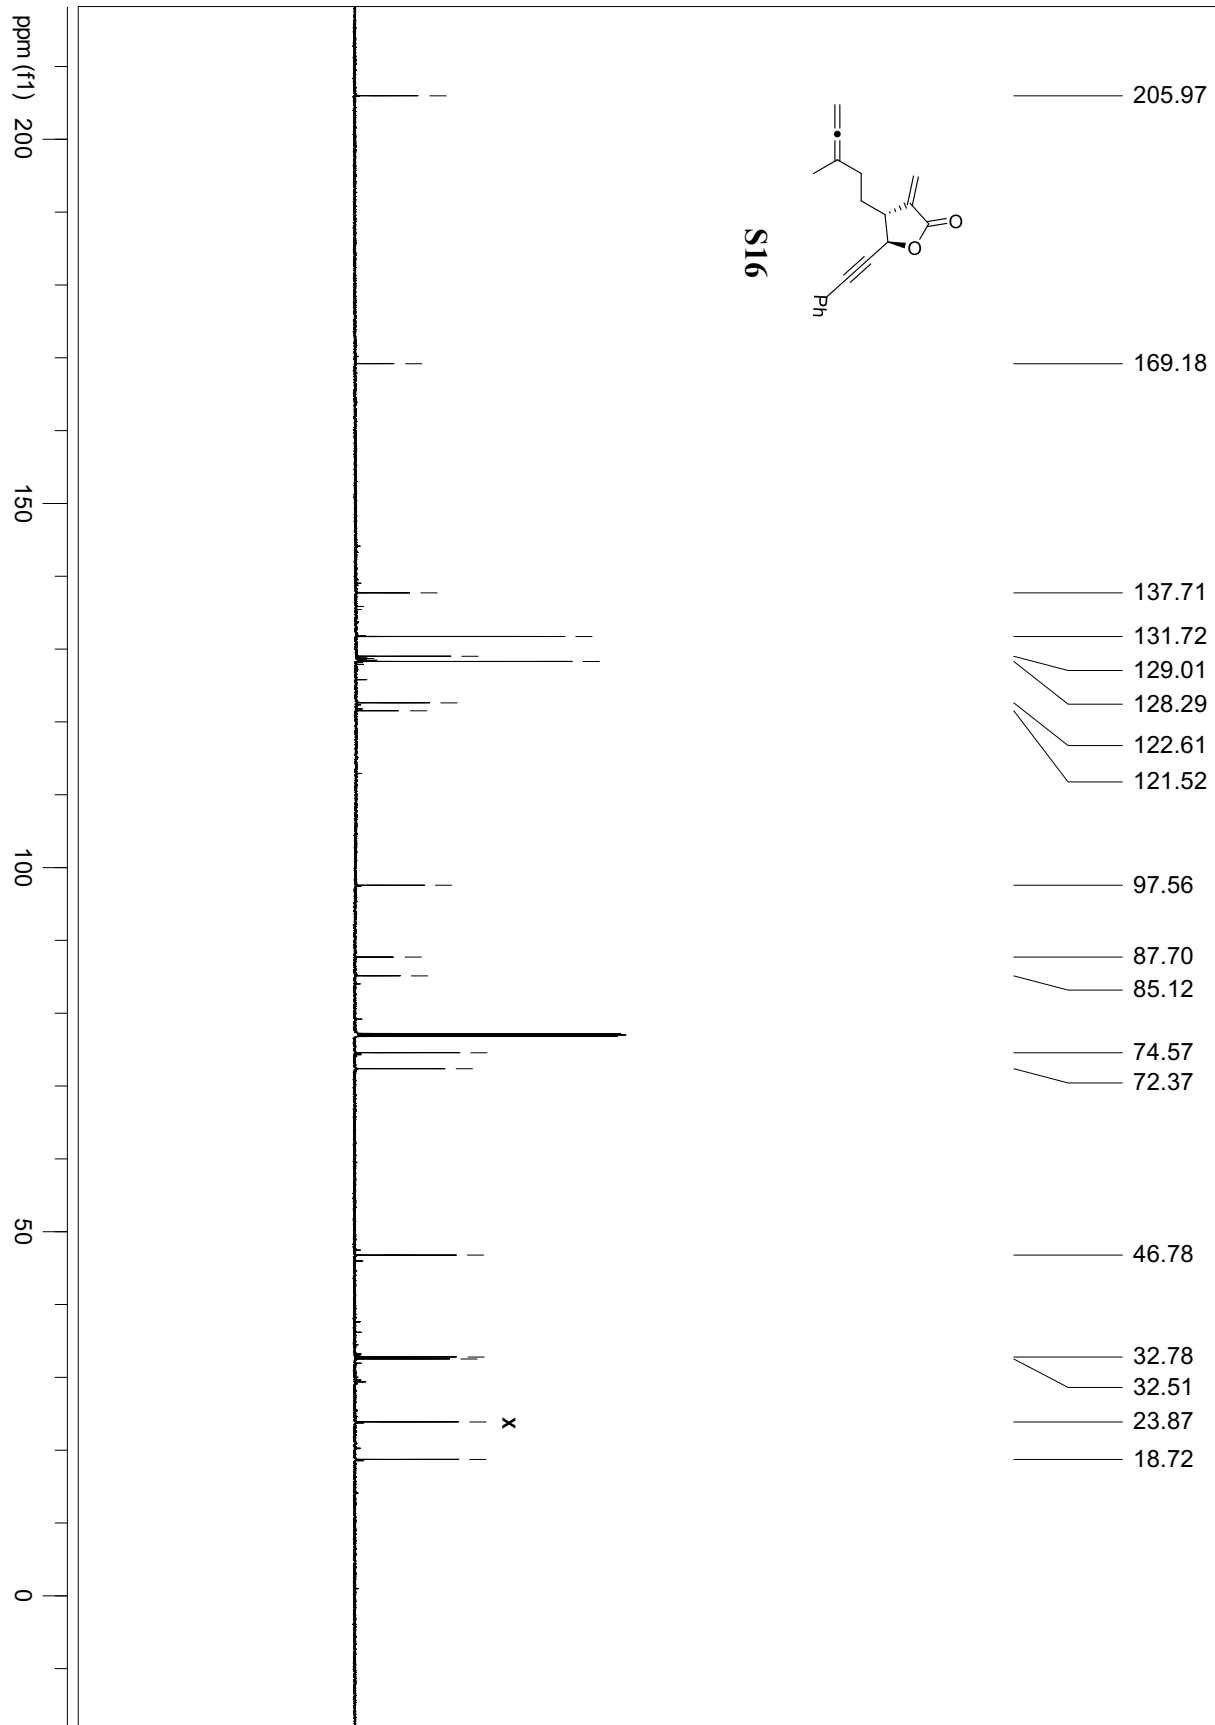

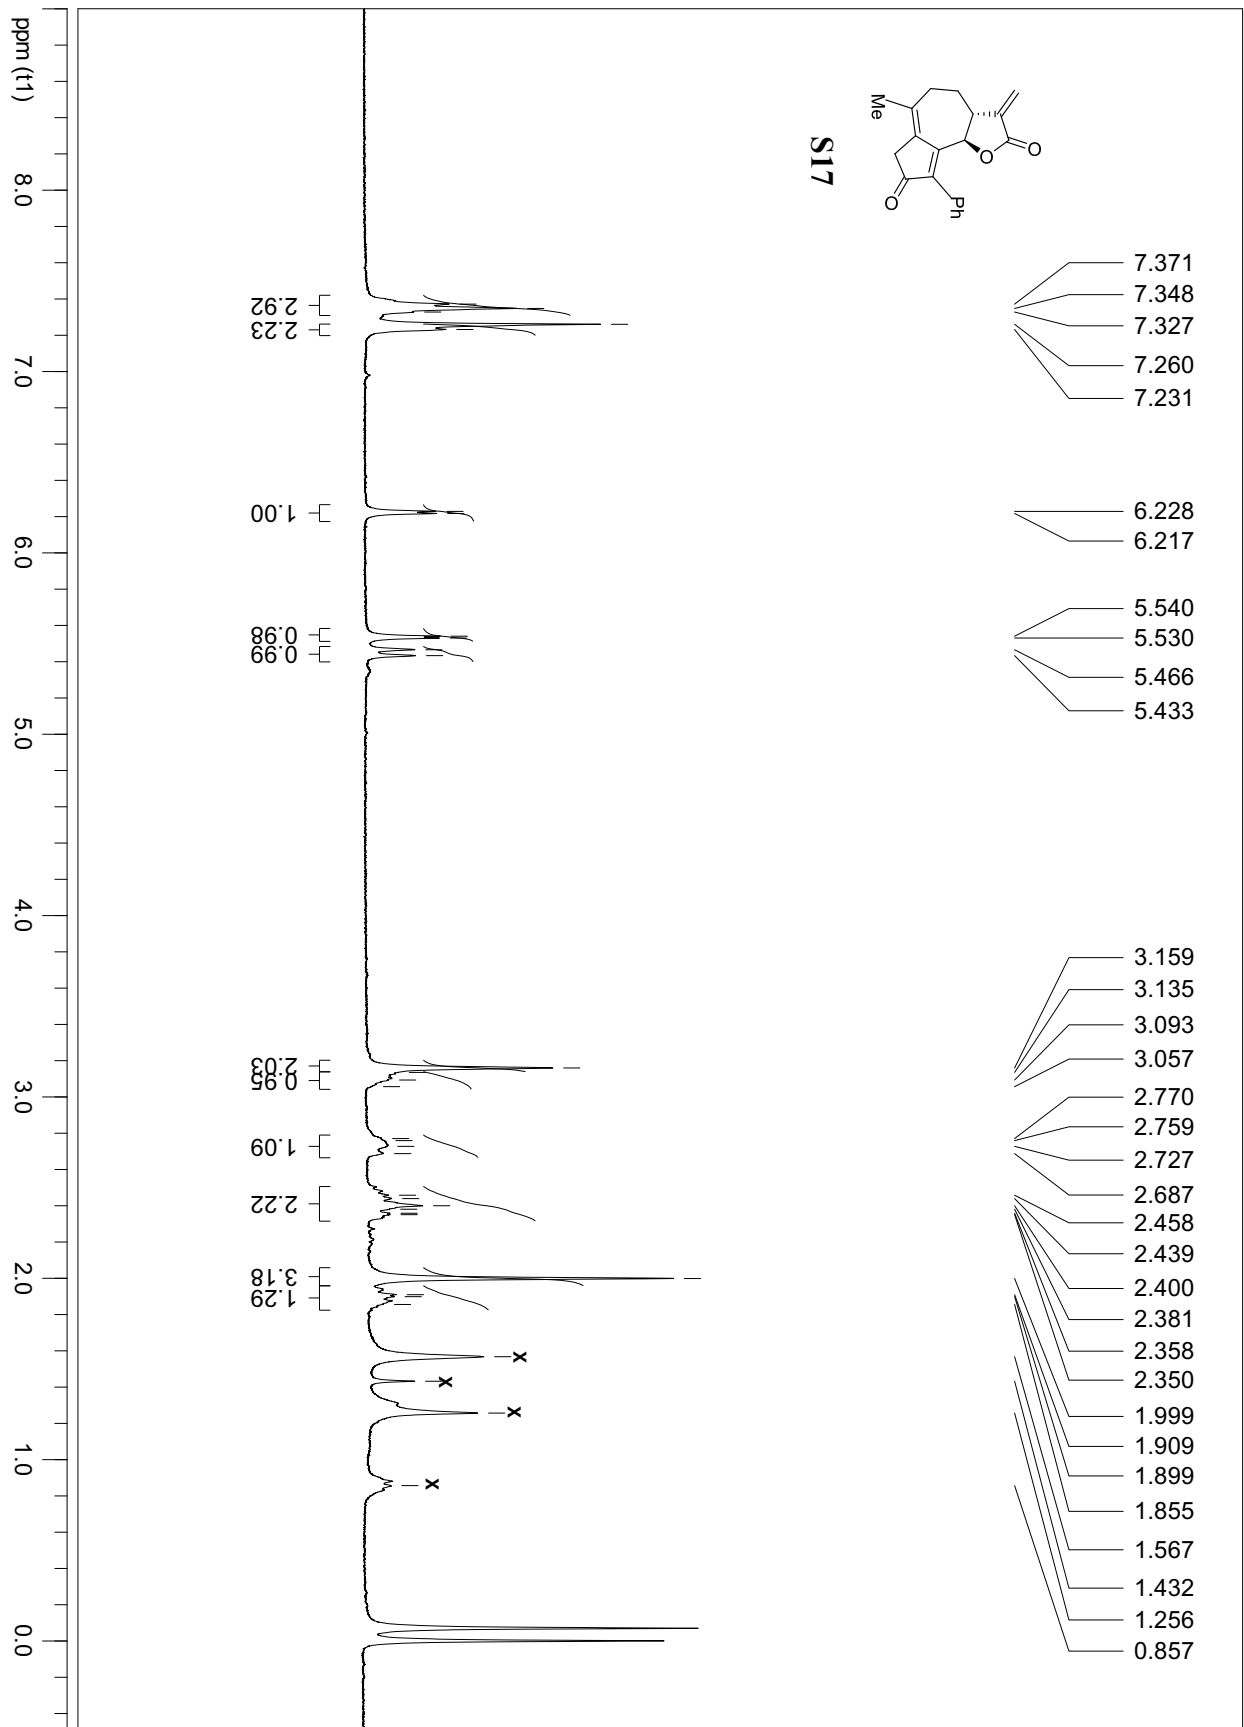

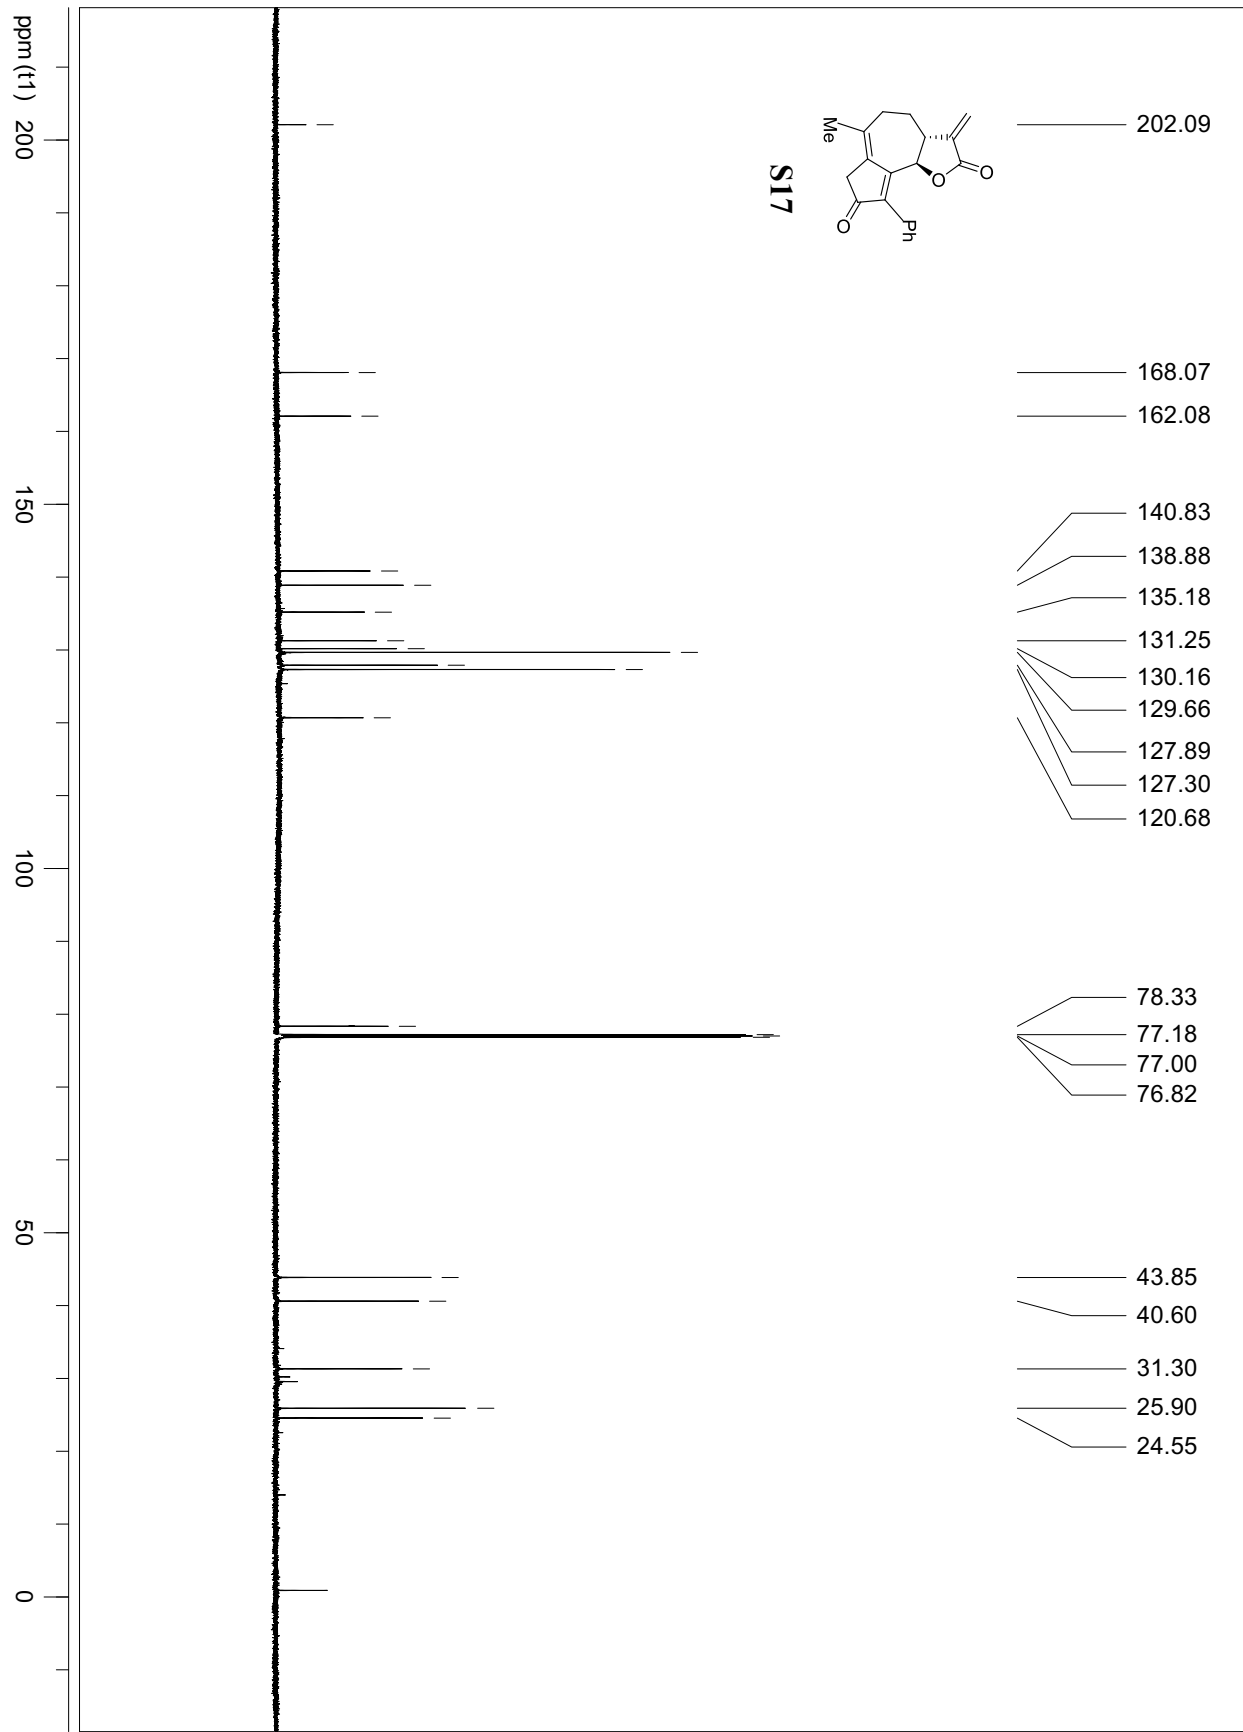



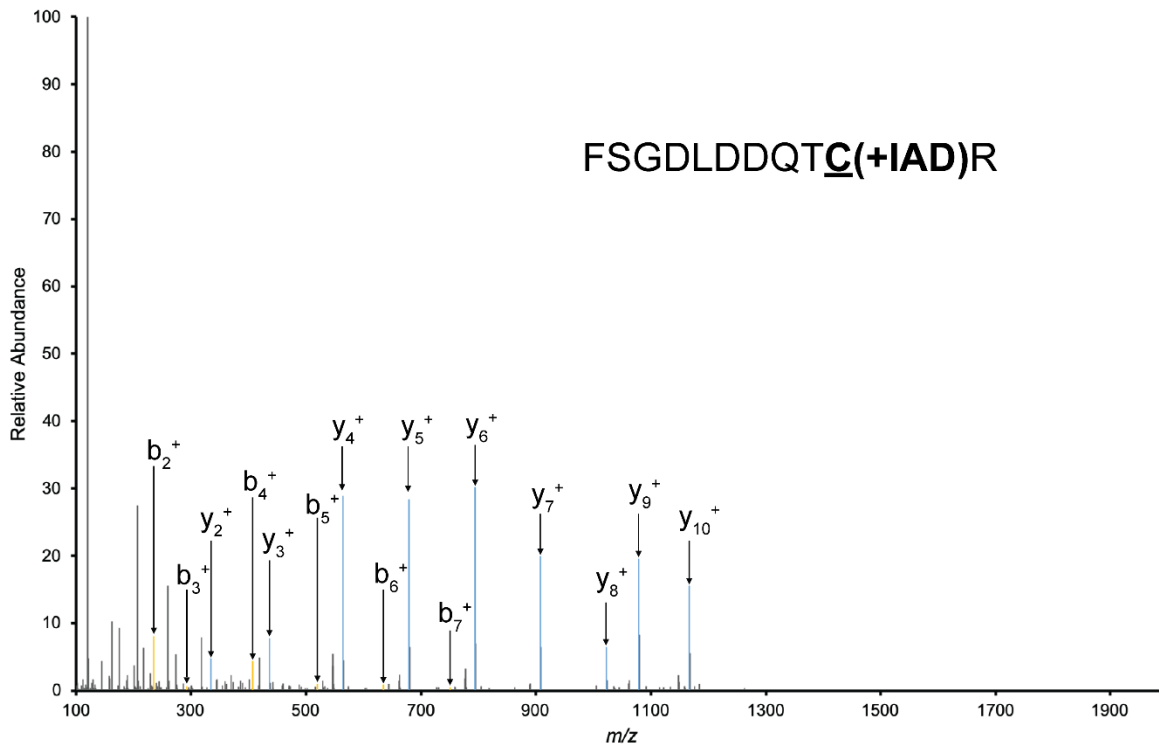

**Figure S27.** Example MS/MS spectrum from precursor ion  $m/z = 657.274$  that is positively identified as a target peptide. The y- and b-ions of the carbamidomethylated FSGDLDDQTC<sup>245</sup>R are highlighted in blue and orange, respectively.

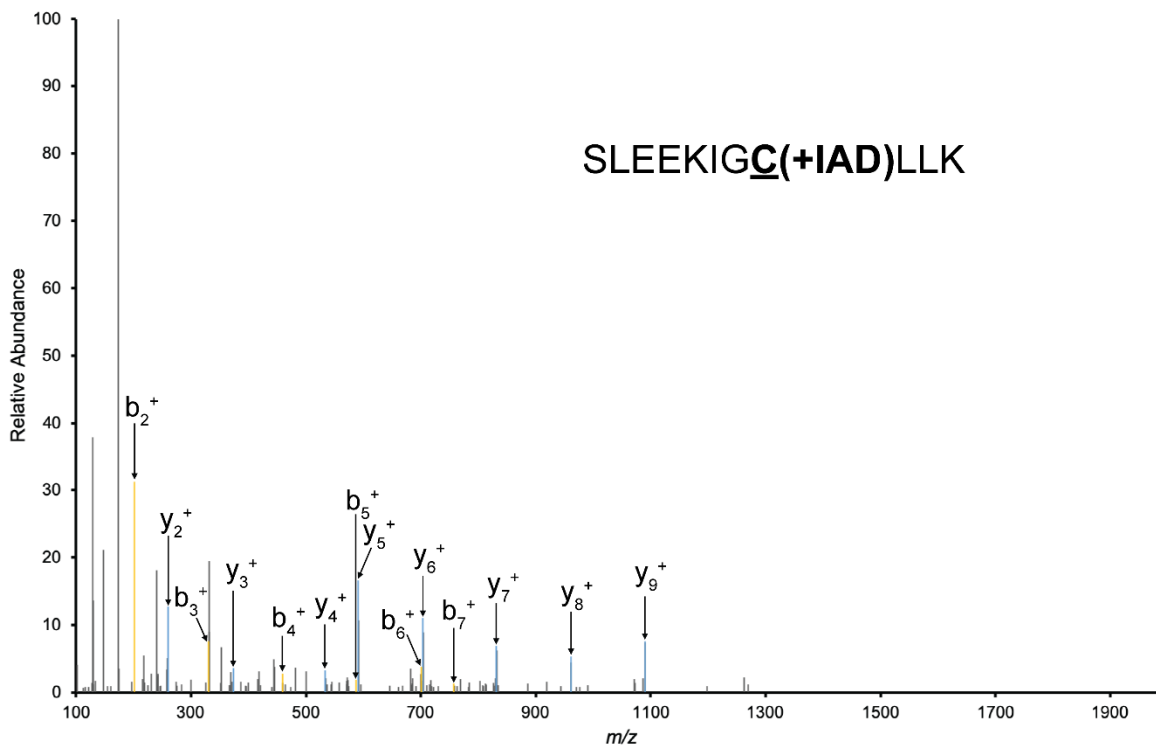

**Figure S28.** Example MS/MS spectrum from precursor ion  $m/z = 645.360$  that is positively identified as a target peptide. The y- and b-ions of the carbamidomethylated SLEEKIGC<sup>232</sup>LLK are highlighted in blue and orange, respectively.

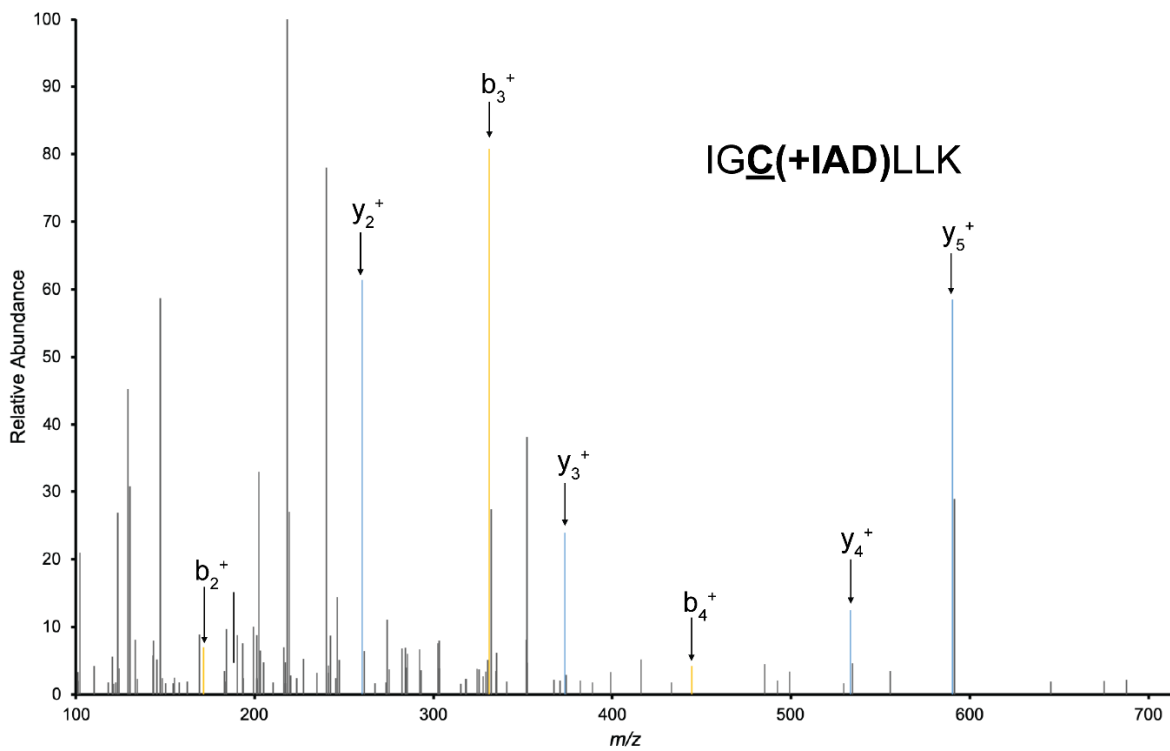

**Figure S29.** Example MS/MS spectrum from precursor ion  $m/z = 352.212$  that is positively identified as a target peptide. The  $y$ - and  $b$ -ions of the carbamidomethylated IGC<sup>232</sup>LLK are highlighted in blue and orange, respectively.

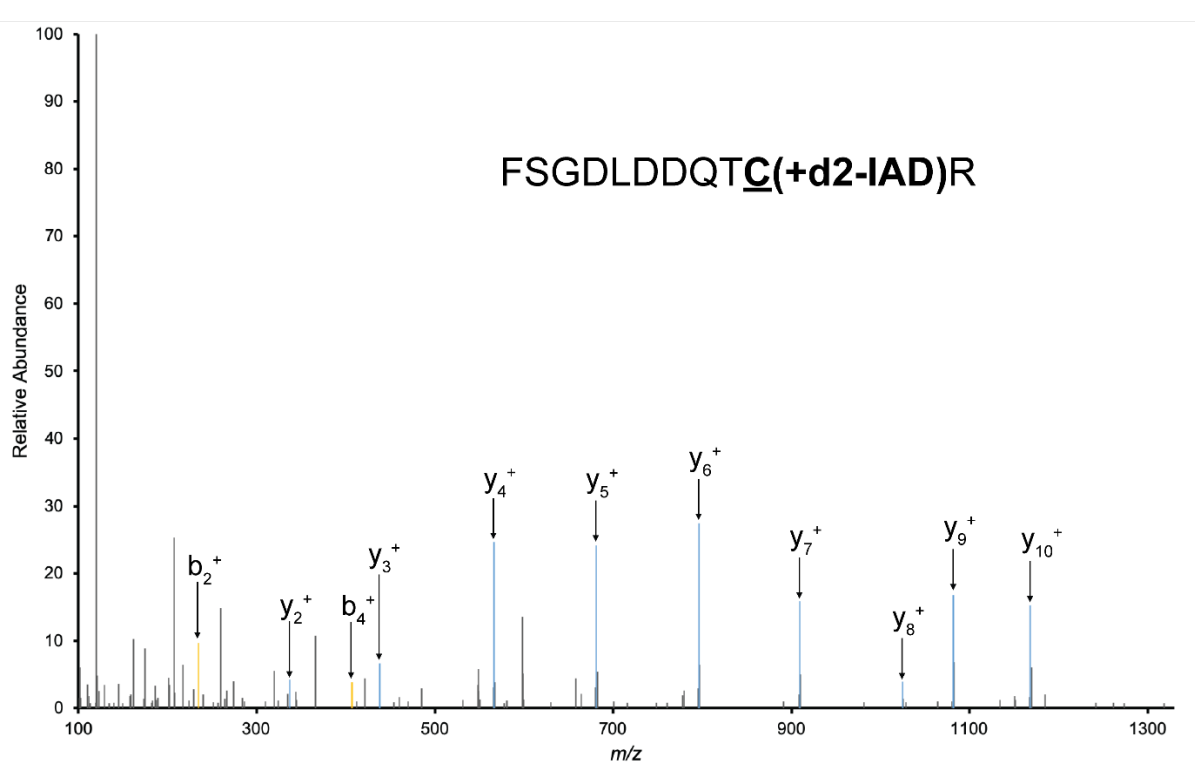

**Figure S30.** Example MS/MS spectrum from precursor ion  $m/z = 658.281$  that is positively identified as a target peptide. The y- and b-ions of the d<sub>2</sub>-carbamidomethylated FSGDLDDQTC<sup>245</sup>R are highlighted in blue and orange, respectively.

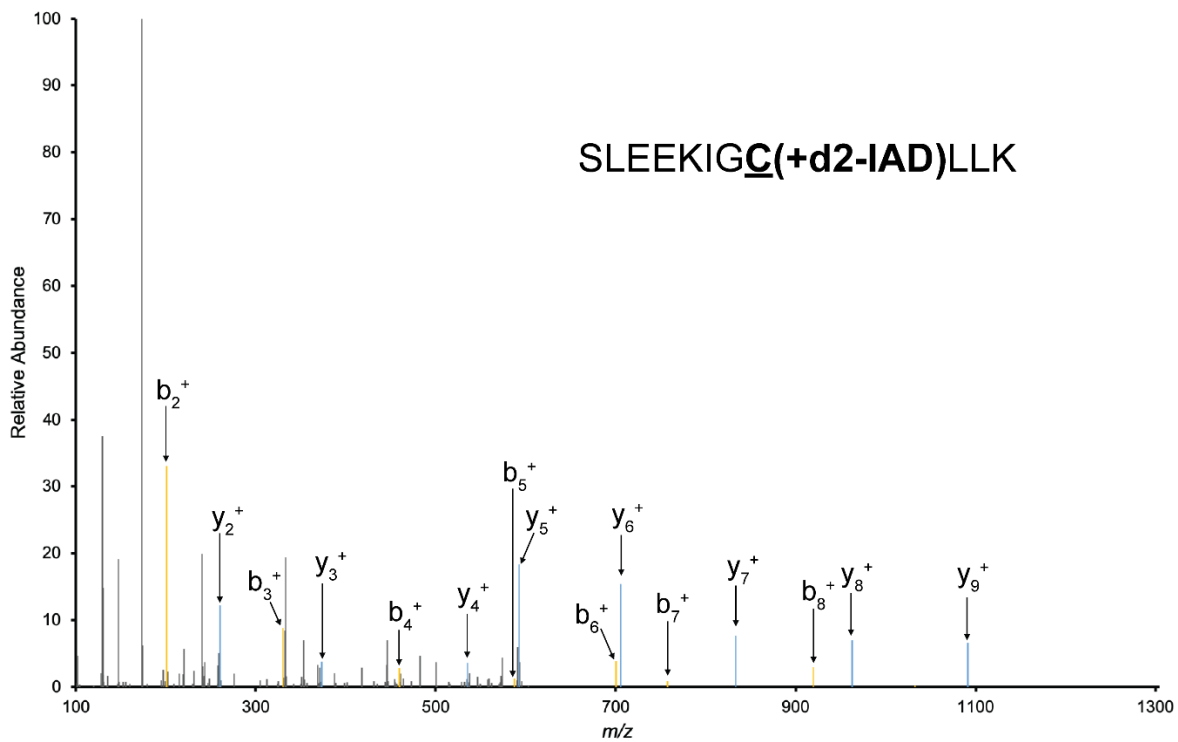

**Figure S31.** Example MS/MS spectrum from precursor ion  $m/z = 646.366$  that is positively identified as a target peptide. The y- and b-ions of the d<sub>2</sub>-carbamidomethylated SLEEKIGC<sup>232</sup>LLK are highlighted in blue and orange, respectively.

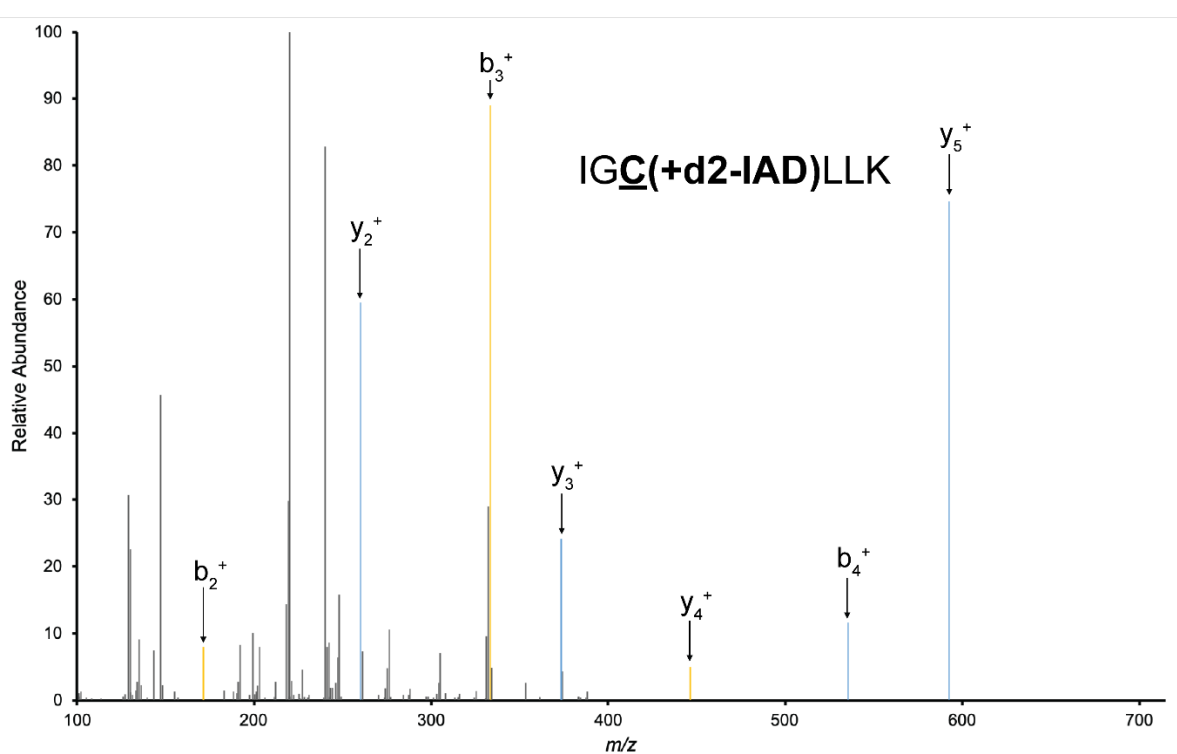

**Figure S32.** Example MS/MS spectrum from precursor ion  $m/z = 353.218$  that is positively identified as a target peptide. The y- and b-ions of the d<sub>2</sub>-carbamidomethylated IGC<sup>232</sup>LLK are highlighted in blue and orange, respectively.

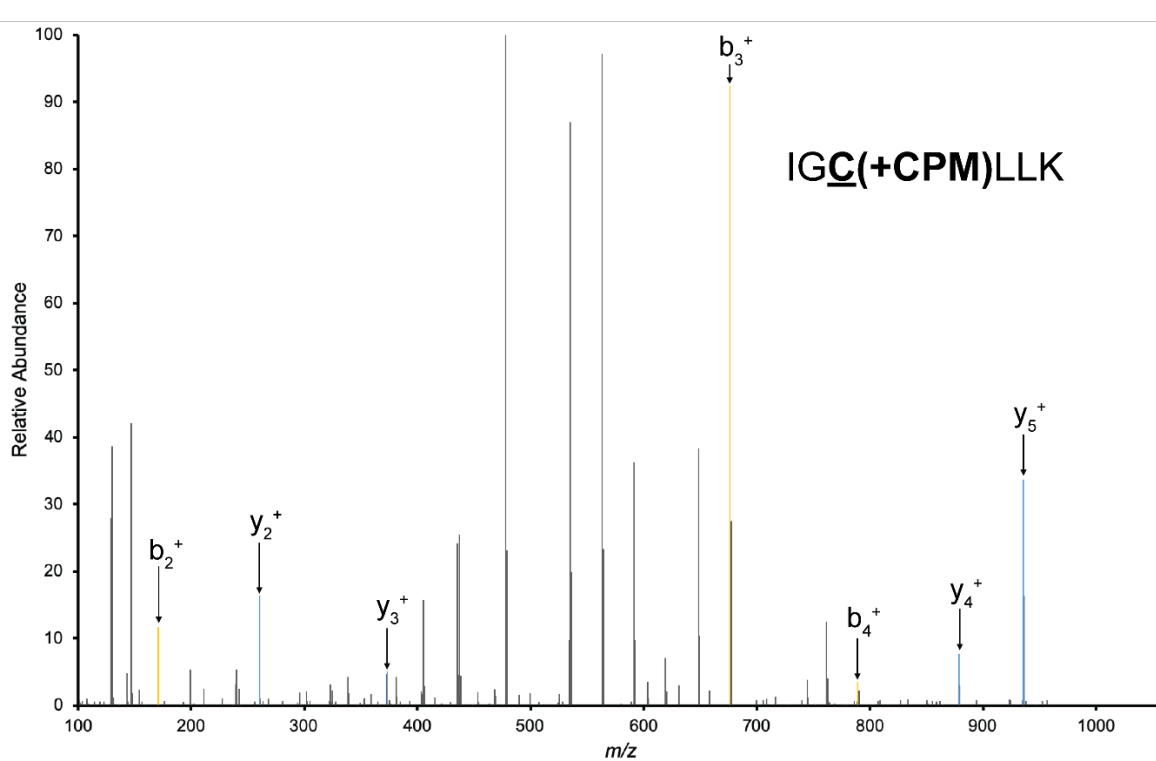

**Figure S33.** Example MS/MS spectrum from precursor ion  $m/z = 524.780$  that is positively identified as a target peptide. The y- and b-ions of the CPM-adducted IGC<sup>232</sup>LLK are highlighted in blue and orange, respectively.

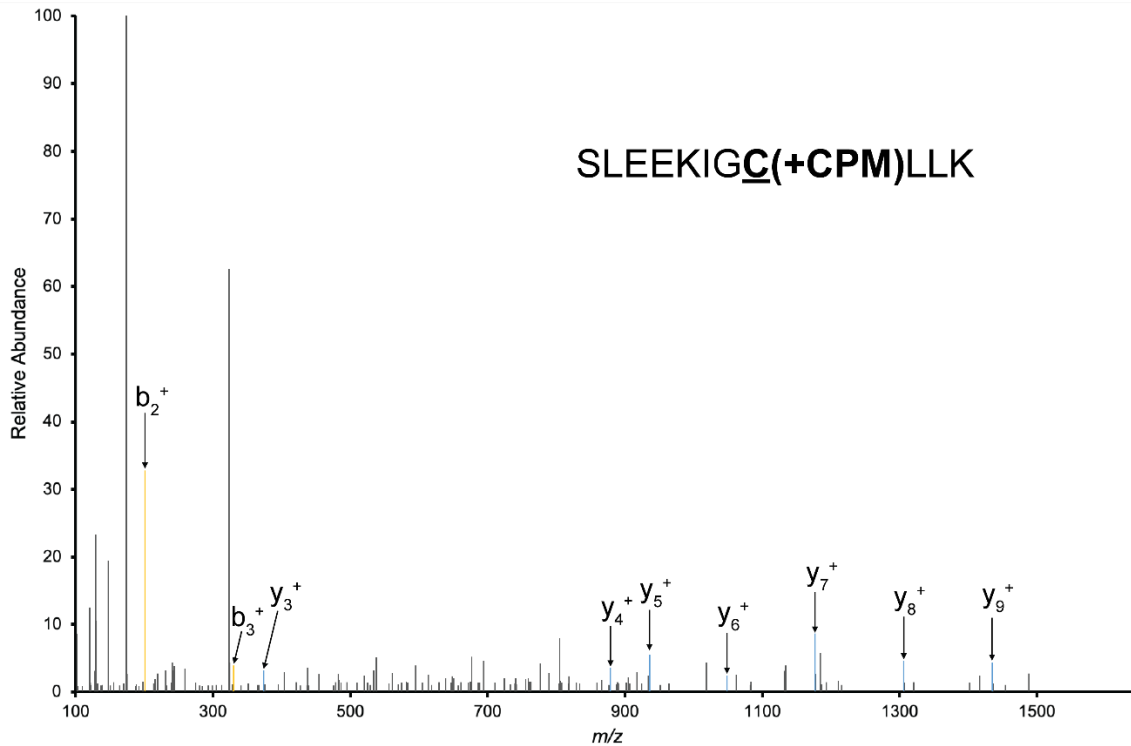

**Figure S34.** Example MS/MS spectrum from precursor ion  $m/z = 817.928$  that is positively identified as a target peptide. The y- and b-ions of the CPM-adducted SLEEKIGC<sup>232</sup>LLK are highlighted in blue and orange, respectively.



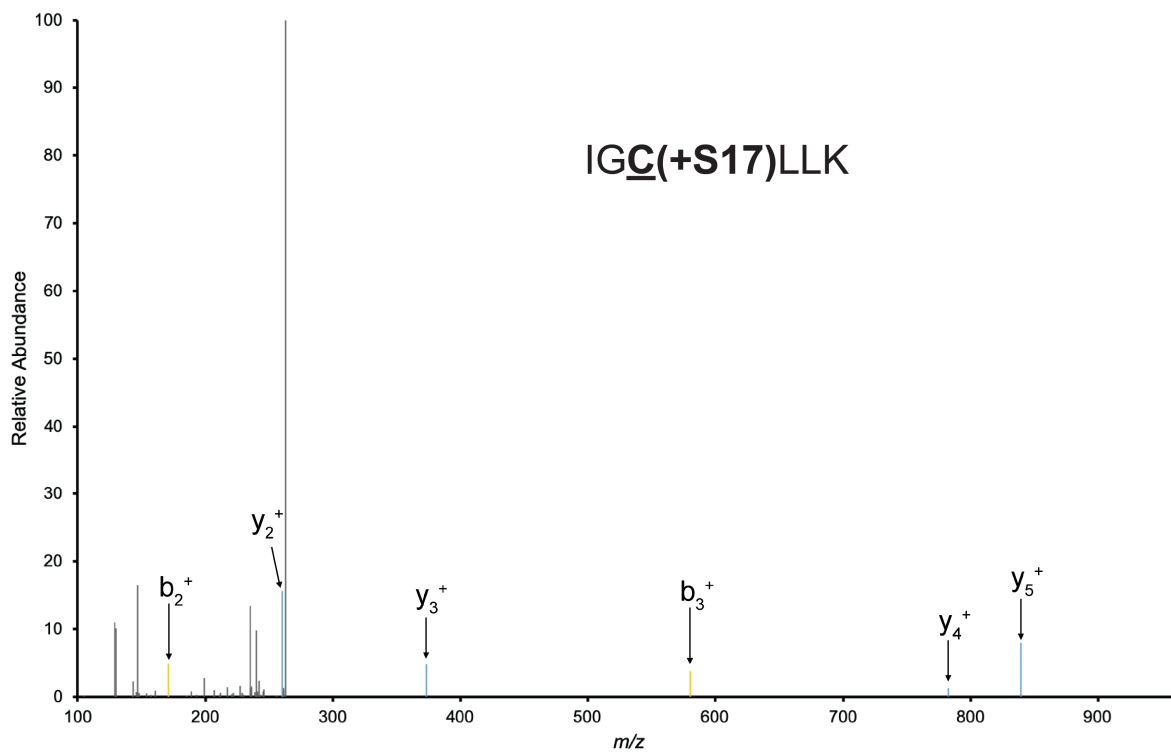

**Figure S35.** Example MS/MS spectrum from precursor ion  $m/z = 476.764$  that is positively identified as a target peptide. The y- and b-ions of the **S17**-adducted IGC<sup>232</sup>LLK are highlighted in blue and orange, respectively.

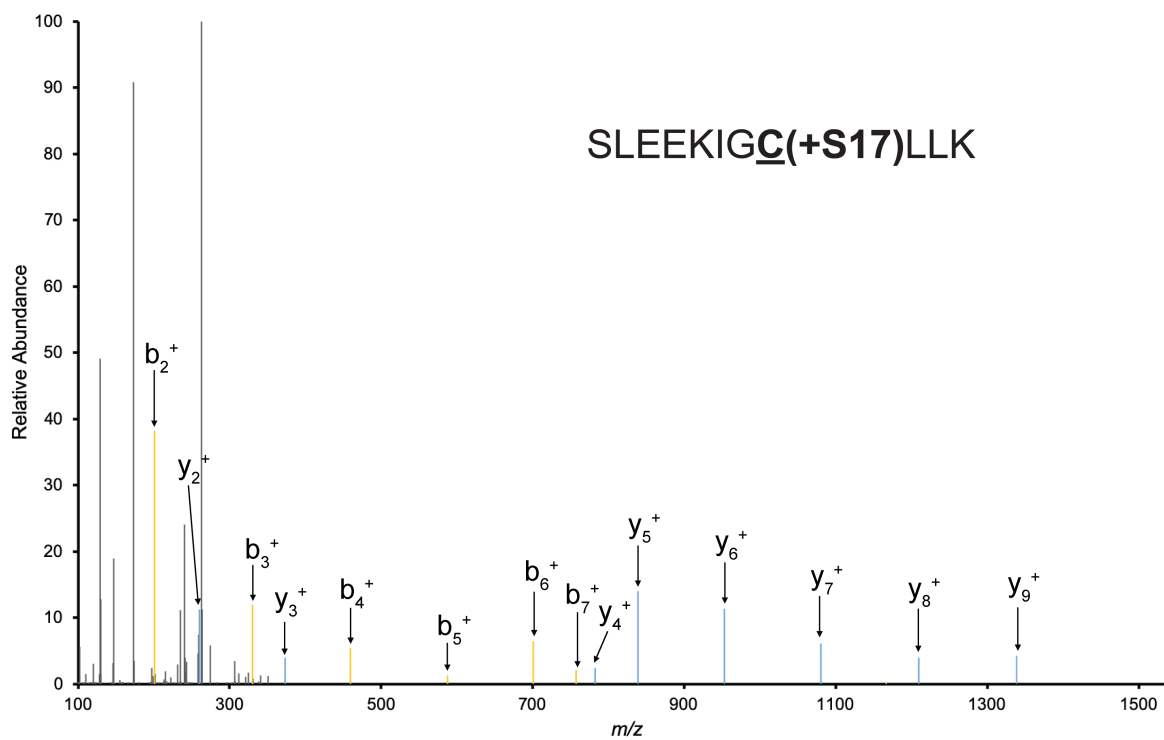

**Figure S36.** Example MS/MS spectrum from precursor ion  $m/z = 817.928$  that is positively identified as a target peptide. The y- and b-ions of the **S17**-adducted SLEEKIGC<sup>232</sup>LLK are highlighted in blue and orange, respectively.

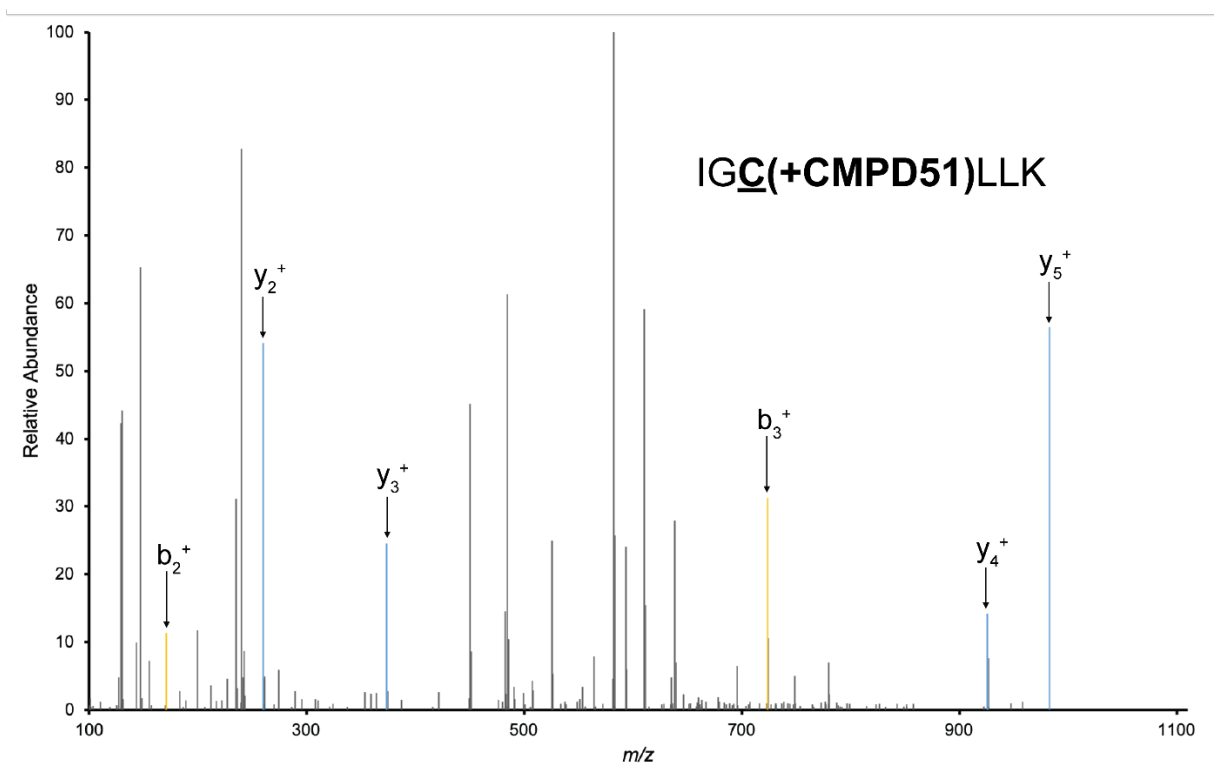

**Figure S37.** Example MS/MS spectrum from precursor ion  $m/z = 548.281$  that is positively identified as a target peptide. The y- and b-ions of **51**-adducted IGC<sup>232</sup>LLK are highlighted in blue and orange, respectively.

## HSQC of $\alpha$ -Methylene- $\gamma$ -Lactam 52

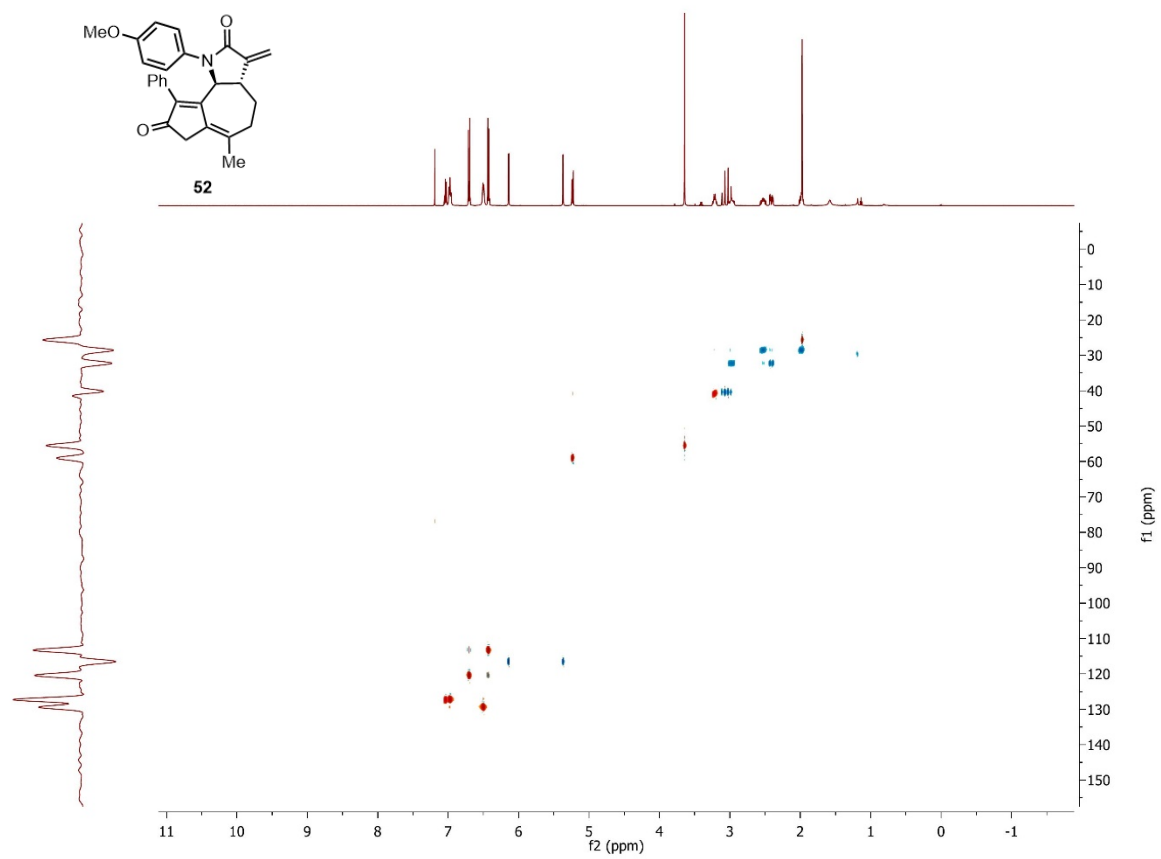

Supplement: NIHMS1776635-supplement-Supporting_Information.pdf [file NIHMS1776635-supplement-Supporting_Information.pdf]
